# Supplementary material for: Effects of Selenium Yeast on Egg Quality, Plasma Antioxidants, Selenium Deposition and Eggshell Formation in Aged Laying Hens
Source: MDPI journal article supplement (doi:10.3390/ani13050902), 2023-03-01
Supplement: s1 [file s1]

**Table S1.** Primers used for qRT-PCR.

| Gene           | Sequence (5'-3')                                       | Product    | Annealing       |
|----------------|--------------------------------------------------------|------------|-----------------|
|                |                                                        | length, bp | temperature, °C |
| <i>OVAL</i>    | F: AAGCAGGCAGAGAGGTGGTAGG<br>R: ACGGCGTTGGTTGCGATGTG   | 121        | 62              |
| <i>SLC6A17</i> | F: TCAAGGTGCGGAAGGAGGTGTT<br>R: ACGGCGATGTTCTCCAGGATGA | 163        | 64              |
| <i>CEMIP</i>   | F: TCTTCAGCGACCGTCCACTCAA<br>R: CTGCCGATCCGTAGCTCTCCAT | 131        | 58              |
| <i>β-actin</i> | F: GAGAAATTGTGCGTGACATCA<br>R: CCTGAACCTCTCATTGCCA     | 152        | 56              |

Abbreviations: *OVAL* = ovalbumin; *SLC6A17* = solute carrier family 6 member 17; *CEMIP* = cell migration inducing hyaluronidase 1.
