# Supplementary material for: Effects of Selenium Yeast on Egg Quality, Plasma Antioxidants, Selenium Deposition and Eggshell Formation in Aged Laying Hens
Source: Animals (Basel). 2023 Mar 1;13(5):902. doi: 10.3390/ani13050902 (PMC10000209; doi:10.3390/ani13050902)
Supplement: Supplementary file 1 [file animals-13-00902-s001.zip]

Archive with 5 entries (5 files):
- Figure S1.pdf
- Supplementary Table S1.pdf
- Supplementary Table S2.xlsx
- Supplementary Table S3.xlsx
- Supplementary Table S4.xlsx
