# Supplementary material for: Effects of Selenium Yeast on Egg Quality, Plasma Antioxidants, Selenium Deposition and Eggshell Formation in Aged Laying Hens
Source: Animals (Basel). 2023 Mar 1;13(5):902. doi: 10.3390/ani13050902 (PMC10000209; doi:10.3390/ani13050902)
Supplement: Supplementary file 1 [file animals-13-00902-s001.zip › Supplementary Table S2.xlsx]

## Sheet: SD vs SY0.15
gene	locus	sample_1	sample_2	value_1	value_2	log2(fold_change)	p_value	q_value	significant
RNase_MRP	4:40106903-40107190	con	SY_0.15	0.0001	7.19178	16.1341	0.00135	0.0140969	yes
ENSGALG00000038852	AADN04008185.1:6942-8537	con	SY_0.15	0.0001	4.04943	15.3054	5e-05	0.000905823	yes
GAL3ST2	9:4749642-4754097	con	SY_0.15	0.324134	231.135	9.47793	5e-05	0.000905823	yes
CHGA	5:44953315-44963482	con	SY_0.15	0.740989	56.0309	6.24063	5e-05	0.000905823	yes
ENSGALG00000040355	2:115687084-115692586	con	SY_0.15	12.1865	903.803	6.21265	5e-05	0.000905823	yes
gallin_2	3:107578250-107578746	con	SY_0.15	25.2021	933.325	5.21077	5e-05	0.000905823	yes
AREG	4:45060435-45066903	con	SY_0.15	0.538772	19.0411	5.1433	5e-05	0.000905823	yes
EREG	4:45042455-45050324	con	SY_0.15	0.379584	13.0148	5.09958	5e-05	0.000905823	yes
PENK	2:111735939-111739272	con	SY_0.15	23.4342	612.413	4.70782	5e-05	0.000905823	yes
FGF1	13:17348658-17363069	con	SY_0.15	6.1657	142.582	4.53138	5e-05	0.000905823	yes
ENSGALG00000042236	AADN04001811.1:20-20443	con	SY_0.15	1.59987	36.2029	4.50008	5e-05	0.000905823	yes
DRD4	5:520311-526176	con	SY_0.15	1.82733	41.0467	4.48946	5e-05	0.000905823	yes
ENSGALG00000014900	3:63404965-63414848	con	SY_0.15	0.262785	5.01795	4.25514	5e-05	0.000905823	yes
DUSP4	4:49691810-49696013	con	SY_0.15	0.34215	5.52647	4.01366	5e-05	0.000905823	yes
ENSGALG00000021274	17:1423994-1430435	con	SY_0.15	0.24341	3.83204	3.97665	5e-05	0.000905823	yes
C15orf59	10:2199546-2206730	con	SY_0.15	1.58646	21.5374	3.76296	5e-05	0.000905823	yes
ENSGALG00000037797	AADN04007824.1:1592-4710	con	SY_0.15	0.0924055	1.1421	3.62756	0.0068	0.0486387	yes
B3GNT7	9:15318556-15320500	con	SY_0.15	3.37094	37.4939	3.47543	5e-05	0.000905823	yes
PHLDA2	5:13148443-13149910	con	SY_0.15	18.4934	183.308	3.30919	5e-05	0.000905823	yes
OTOP2	18:10636189-10650511	con	SY_0.15	25.6902	251.979	3.29401	5e-05	0.000905823	yes
FOS	5:38264803-38267713	con	SY_0.15	11.3305	110.104	3.28059	5e-05	0.000905823	yes
TSKU	1:193483507-193498274	con	SY_0.15	5.52731	53.448	3.27349	5e-05	0.000905823	yes
CDHR1	6:3035223-3068706	con	SY_0.15	0.312079	2.99132	3.2608	5e-05	0.000905823	yes
ETV4	27:3550455-3562778	con	SY_0.15	2.59134	24.2497	3.2262	5e-05	0.000905823	yes
SLC5A9	8:22688087-22754261	con	SY_0.15	2.42706	22.3262	3.20146	0.0012	0.0128174	yes
ENSGALG00000016165	1:109383705-109388083	con	SY_0.15	11.2708	99.3127	3.13939	5e-05	0.000905823	yes
TC2N	5:44480200-44495004	con	SY_0.15	6.56133	57.1819	3.1235	5e-05	0.000905823	yes
NR4A1	AADN04001839.1:12961-19403	con	SY_0.15	3.21257	26.2088	3.02825	5e-05	0.000905823	yes
ENSGALG00000043582	2:148492681-148497873	con	SY_0.15	20.9679	170.426	3.02289	5e-05	0.000905823	yes
ASIC2	27:1939763-2016704	con	SY_0.15	0.7287	5.89065	3.01503	5e-05	0.000905823	yes
GREM1	5:30579486-30580185	con	SY_0.15	3.46431	27.4236	2.98478	5e-05	0.000905823	yes
REG4	8:4258297-4259712	con	SY_0.15	1.51346	11.9618	2.98251	5e-05	0.000905823	yes
ENSGALG00000036145	7:6803174-6803883	con	SY_0.15	30.2135	234.88	2.95866	5e-05	0.000905823	yes
PDE4C	28:3997168-4005304	con	SY_0.15	0.481493	3.64515	2.92039	5e-05	0.000905823	yes
ENSGALG00000033283	AADN04007470.1:134-9448	con	SY_0.15	0.240442	1.79526	2.90043	0.00075	0.00889549	yes
T	3:43074401-43082303	con	SY_0.15	0.795948	5.83516	2.87403	5e-05	0.000905823	yes
ENSGALG00000030720	AADN04000704.1:70101-77227	con	SY_0.15	1.55889	11.2916	2.85665	5e-05	0.000905823	yes
PLK2	Z:18020073-18025386	con	SY_0.15	8.26118	59.6254	2.85151	5e-05	0.000905823	yes
Id1	20:10207841-10209004	con	SY_0.15	14.3482	101.548	2.82322	5e-05	0.000905823	yes
PRKG2	4:45935472-45954816	con	SY_0.15	2.62386	18.5508	2.82172	5e-05	0.000905823	yes
ETV5	9:5114527-5123909	con	SY_0.15	6.37173	44.8441	2.81516	5e-05	0.000905823	yes
ANKRD9	5:49728730-49729609	con	SY_0.15	3.42784	23.9747	2.80614	5e-05	0.000905823	yes
MSS51	14:13126747-13129142	con	SY_0.15	0.14186	0.973241	2.77833	0.0047	0.0367447	yes
TRIM35	3:105797590-105802351	con	SY_0.15	22.9002	153.492	2.74474	5e-05	0.000905823	yes
ENSGALG00000035935	10:8129597-8287922	con	SY_0.15	1.86561	12.4747	2.74128	5e-05	0.000905823	yes
STC2	13:9230033-9239581	con	SY_0.15	10.6975	71.2907	2.73644	5e-05	0.000905823	yes
ENSGALG00000044761	KQ759404.1:315979-317695	con	SY_0.15	0.175633	1.15192	2.7134	0.00165	0.0166018	yes
WNT7A	12:6037840-6069834	con	SY_0.15	2.68622	17.212	2.67977	5e-05	0.000905823	yes
ENSGALG00000033586	AADN04006626.1:20-5521	con	SY_0.15	12.9536	81.3566	2.6509	5e-05	0.000905823	yes
EGR1	13:18348954-18351756	con	SY_0.15	10.3955	64.8189	2.64045	5e-05	0.000905823	yes
GADL1	2:40023359-40105157	con	SY_0.15	16.0994	99.6913	2.63046	5e-05	0.000905823	yes
GNG4	3:38148553-38161698	con	SY_0.15	1.32455	8.04873	2.60326	5e-05	0.000905823	yes
OXTR	12:19319351-19323273	con	SY_0.15	0.488587	2.7811	2.50897	0.0005	0.00640767	yes
ENSGALG00000008896	7:14159349-14200241	con	SY_0.15	0.268849	1.51746	2.49679	0.00175	0.0173246	yes
ENSGALG00000013072	1:62496372-62504516	con	SY_0.15	7.48509	41.9605	2.48694	5e-05	0.000905823	yes
ENSGALG00000025996	6:33407190-33426169	con	SY_0.15	0.235113	1.31349	2.48199	5e-05	0.000905823	yes
NR4A3	2:89674439-89694916	con	SY_0.15	3.56047	19.7641	2.47274	5e-05	0.000905823	yes
ENSGALG00000043210	AADN04012245.1:4096-4677	con	SY_0.15	143.643	777.8	2.43691	5e-05	0.000905823	yes
ENSGALG00000043026	AADN04000704.1:45427-51696	con	SY_0.15	3.58879	19.2467	2.42304	5e-05	0.000905823	yes
MAP3K15	1:120215623-120287272	con	SY_0.15	2.57383	13.7835	2.42095	5e-05	0.000905823	yes
BPIFB2	20:10498384-10503032	con	SY_0.15	1.10433	5.88237	2.41323	5e-05	0.000905823	yes
ENSGALG00000003203	12:2634370-2635472	con	SY_0.15	1.50942	7.92047	2.39159	0.00015	0.00237699	yes
CREBZF	1:190323785-190324640	con	SY_0.15	0.697837	3.62368	2.37649	0.0008	0.0093573	yes
EAF2	7:26469582-26482932	con	SY_0.15	13.9613	67.8785	2.28152	5e-05	0.000905823	yes
ENSGALG00000008352	10:20173862-20181914	con	SY_0.15	10.0603	48.8262	2.27898	5e-05	0.000905823	yes
ENSGALG00000011281	2:36030780-36036088	con	SY_0.15	16.4744	78.291	2.24863	5e-05	0.000905823	yes
ENSGALG00000030898	AADN04012696.1:20-6668	con	SY_0.15	0.461426	2.18929	2.24629	5e-05	0.000905823	yes
ENSGALG00000043903	AADN04000704.1:31648-32962	con	SY_0.15	3.62861	17.0387	2.23133	5e-05	0.000905823	yes
ENSGALG00000037851	13:16816437-16818397	con	SY_0.15	1.00008	4.67144	2.22375	0.00115	0.0123909	yes
SYT8	5:14108058-14112076	con	SY_0.15	8.63461	40.2543	2.22094	5e-05	0.000905823	yes
ENSGALG00000003644	10:4364154-4365882	con	SY_0.15	6.4726	29.9943	2.21227	5e-05	0.000905823	yes
ENSGALG00000027899	4:2129526-2130582	con	SY_0.15	1.1354	5.25552	2.21063	0.00055	0.00690459	yes
RGS1	8:3620500-3624059	con	SY_0.15	0.202817	0.938685	2.21046	0.0052	0.039848	yes
ENSGALG00000008932	17:1407212-1416410	con	SY_0.15	11.5981	52.6986	2.18387	5e-05	0.000905823	yes
RNF208	17:1464875-1465673	con	SY_0.15	6.65159	30.0814	2.1771	5e-05	0.000905823	yes
ENSGALG00000046133	12:2696195-2701876	con	SY_0.15	3.81621	17.202	2.17236	5e-05	0.000905823	yes
TRIB2	3:98314007-98334982	con	SY_0.15	7.57464	33.8429	2.15961	5e-05	0.000905823	yes
ENSGALG00000010268	4:34869459-34877868	con	SY_0.15	29.9564	133.195	2.1526	5e-05	0.000905823	yes
ENSGALG00000030751	15:2634712-2636326	con	SY_0.15	2.73291	11.95	2.1285	5e-05	0.000905823	yes
ENSGALG00000006375	9:4743414-4745533	con	SY_0.15	0.736261	3.16373	2.10334	0.00165	0.0166018	yes
PTGES	17:6141753-6144217	con	SY_0.15	14.3256	61.5332	2.10277	5e-05	0.000905823	yes
ENSGALG00000010926	4:45974554-45977750	con	SY_0.15	135.847	579.449	2.0927	5e-05	0.000905823	yes
RGS7	3:36010697-36240970	con	SY_0.15	0.872988	3.71195	2.08814	5e-05	0.000905823	yes
ENSGALG00000046548	1:83108717-83116269	con	SY_0.15	1.13466	4.73766	2.06191	0.00115	0.0123909	yes
ENSGALG00000041290	AADN04017652.1:20-4304	con	SY_0.15	0.401049	1.65455	2.04458	0.00015	0.00237699	yes
ENSGALG00000032910	12:3500783-3501119	con	SY_0.15	67.5392	278.342	2.04306	5e-05	0.000905823	yes
ENSGALG00000028238	6:23565910-23569213	con	SY_0.15	0.80106	3.24152	2.01669	0.0001	0.00169162	yes
BDKRB1	5:46461640-46462717	con	SY_0.15	0.420131	1.69791	2.01485	0.0059	0.043919	yes
ENSGALG00000006407	5:13059341-13065622	con	SY_0.15	23.3405	93.8411	2.00739	5e-05	0.000905823	yes
ENSGALG00000008881	17:1861275-1913128	con	SY_0.15	58.3826	234.636	2.00681	5e-05	0.000905823	yes
NDUFAF8	18:9347715-9348299	con	SY_0.15	23.2437	92.1792	1.9876	5e-05	0.000905823	yes
ENSGALG00000038715	14:14262436-14262808	con	SY_0.15	6.16766	24.2584	1.97569	0.00265	0.0238606	yes
RUBCNL	1:168099690-168119251	con	SY_0.15	12.5552	49.2837	1.97282	5e-05	0.000905823	yes
ENSGALG00000044604	KQ759573.1:3948-8264	con	SY_0.15	0.210557	0.822083	1.96507	0.0028	0.024995	yes
ENSGALG00000011324	7:22321912-22324930	con	SY_0.15	3.51871	13.6813	1.95909	5e-05	0.000905823	yes
ANGPTL4	28:838934-846067	con	SY_0.15	0.666994	2.59121	1.95788	0.00025	0.00359538	yes
CPZ	4:81756779-81791318	con	SY_0.15	2.83773	11.0175	1.95698	5e-05	0.000905823	yes
RPS27	25:2081231-2081985	con	SY_0.15	613.443	2371.8	1.95099	5e-05	0.000905823	yes
ALDH1A1	Z:35893998-35947479	con	SY_0.15	0.810759	3.12482	1.94643	0.0001	0.00169162	yes
BTC	4:34879239-34884609	con	SY_0.15	1.18371	4.55744	1.94491	0.00015	0.00237699	yes
MMP9	20:10773801-10777893	con	SY_0.15	0.238989	0.91453	1.93609	0.0025	0.0228598	yes
ENSGALG00000043546	AADN04006481.1:2043-7252	con	SY_0.15	142.775	543.212	1.92778	5e-05	0.000905823	yes
CTHRC1	2:130013429-130018289	con	SY_0.15	1.30194	4.94436	1.92512	0.00015	0.00237699	yes
ENSGALG00000030767	2:111387707-111406662	con	SY_0.15	0.393562	1.48229	1.91317	0.0006	0.00743571	yes
ENSGALG00000044278	3:40814254-40818323	con	SY_0.15	2.63346	9.89032	1.90906	0.0003	0.00419411	yes
PLAU	6:15493643-15501817	con	SY_0.15	5.90406	22.0011	1.8978	5e-05	0.000905823	yes
FABP3	23:593368-596671	con	SY_0.15	17.2425	63.5195	1.88123	5e-05	0.000905823	yes
ENSGALG00000000115	16:189280-190877	con	SY_0.15	10.9929	40.4919	1.88106	5e-05	0.000905823	yes
ENSGALG00000011166	5:48265286-48268809	con	SY_0.15	3.15142	11.6027	1.88039	0.00015	0.00237699	yes
ENSGALG00000023950	26:2657651-2663698	con	SY_0.15	19.956	73.3685	1.87834	5e-05	0.000905823	yes
C8orf4	22:2509376-2510527	con	SY_0.15	39.5257	145.02	1.87539	5e-05	0.000905823	yes
ENSGALG00000020982	20:10511916-10517297	con	SY_0.15	4.51769	16.3901	1.85917	5e-05	0.000905823	yes
NR4A2	7:36220883-36228064	con	SY_0.15	1.37574	4.97483	1.85444	5e-05	0.000905823	yes
RPS28	28:874866-875414	con	SY_0.15	199.945	719.809	1.84801	5e-05	0.000905823	yes
ENSGALG00000030635	7:7918156-7919078	con	SY_0.15	4.93915	17.6175	1.83467	5e-05	0.000905823	yes
ENSGALG00000045878	12:2903111-2908468	con	SY_0.15	2.82901	10.0034	1.82212	5e-05	0.000905823	yes
TBXAS1	1:55806773-56041222	con	SY_0.15	1.81819	6.39014	1.81334	5e-05	0.000905823	yes
ENSGALG00000012382	7:31731613-31814126	con	SY_0.15	0.602519	2.10494	1.8047	0.0009	0.0102869	yes
ENSGALG00000034594	21:4107701-4108148	con	SY_0.15	55.386	191.833	1.79226	5e-05	0.000905823	yes
ENSGALG00000034997	AADN04017342.1:16-3247	con	SY_0.15	0.716377	2.48009	1.7916	0.0036	0.0300919	yes
CDCP2	8:25223274-25226916	con	SY_0.15	2.99275	10.3171	1.78549	5e-05	0.000905823	yes
SRM	21:4108252-4113303	con	SY_0.15	34.7876	119.104	1.77557	5e-05	0.000905823	yes
TNS4	27:4872137-4879191	con	SY_0.15	7.33632	24.9491	1.76586	5e-05	0.000905823	yes
THBS4	Z:22015577-22053824	con	SY_0.15	0.266746	0.906932	1.76553	0.00105	0.0115903	yes
ODC1	3:97207232-97215296	con	SY_0.15	30.0747	101.874	1.76016	5e-05	0.000905823	yes
ENSGALG00000034566	AADN04001110.1:722-11866	con	SY_0.15	3.81564	12.8599	1.75288	5e-05	0.000905823	yes
BTBD17	18:9214741-9217838	con	SY_0.15	1.03527	3.47763	1.7481	0.0002	0.00296127	yes
ENSGALG00000040226	18:8869721-8871282	con	SY_0.15	5.41186	18.1757	1.74781	5e-05	0.000905823	yes
MCOLN2	8:16453749-16476405	con	SY_0.15	0.845132	2.81882	1.73784	5e-05	0.000905823	yes
SGK1	3:56365720-56371288	con	SY_0.15	97.8286	325.809	1.7357	5e-05	0.000905823	yes
ENSGALG00000045559	Z:70205472-70211427	con	SY_0.15	0.779882	2.57938	1.7257	0.0031	0.0268409	yes
ENSGALG00000044536	AADN04001032.1:6805-7358	con	SY_0.15	9.54918	31.3752	1.71618	5e-05	0.000905823	yes
IGFBP1	2:55087643-55093886	con	SY_0.15	1.48771	4.88377	1.7149	5e-05	0.000905823	yes
WIF1	1:33881873-33923658	con	SY_0.15	6.27678	20.5305	1.70967	5e-05	0.000905823	yes
WNT5B	1:60973500-60989342	con	SY_0.15	6.44222	21.051	1.70826	5e-05	0.000905823	yes
ENSGALG00000038012	AADN04006259.1:3851-6561	con	SY_0.15	2.6561	8.57309	1.6905	5e-05	0.000905823	yes
CNGA2	4:10960844-10962293	con	SY_0.15	0.471453	1.51933	1.68825	0.0045	0.0355093	yes
COL21A1	3:87551100-87625448	con	SY_0.15	2.59445	8.30283	1.67817	5e-05	0.000905823	yes
ACP5	AADN04001212.1:12362-15202	con	SY_0.15	3.1042	9.88929	1.67165	0.0002	0.00296127	yes
BRINP1	17:4502516-4580960	con	SY_0.15	0.470942	1.49981	1.67116	0.0014	0.0145628	yes
KCNJ2	18:8259054-8265799	con	SY_0.15	3.10171	9.83238	1.66448	5e-05	0.000905823	yes
EGR3	AADN04000931.1:9736-13063	con	SY_0.15	2.67643	8.45009	1.65865	0.00015	0.00237699	yes
ENSGALG00000009458	9:20403470-20563585	con	SY_0.15	2.44981	7.71883	1.65571	5e-05	0.000905823	yes
ENSGALG00000040904	AADN04012242.1:1935-6199	con	SY_0.15	1.4014	4.39862	1.65019	0.0002	0.00296127	yes
FAIM2	33:1421844-1435440	con	SY_0.15	3.73571	11.6875	1.64552	0.00015	0.00237699	yes
WSCD2	15:6524247-6533384	con	SY_0.15	4.82544	15.0187	1.63802	5e-05	0.000905823	yes
SERPINB5	2:68016051-68022790	con	SY_0.15	6.91803	21.5083	1.63646	5e-05	0.000905823	yes
FJX1	5:19185022-19186177	con	SY_0.15	2.82712	8.78264	1.63532	0.0003	0.00419411	yes
SGK3	2:115613449-115669550	con	SY_0.15	34.0201	105.46	1.63224	5e-05	0.000905823	yes
CARHSP1	14:10077020-10104332	con	SY_0.15	29.793	92.279	1.63103	5e-05	0.000905823	yes
ENSGALG00000028145	3:76105663-76106296	con	SY_0.15	8.49396	26.3	1.63055	5e-05	0.000905823	yes
HTR1E	3:76904837-76905953	con	SY_0.15	1.1545	3.57286	1.62981	0.00035	0.00477957	yes
ENSGALG00000042660	AADN04004671.1:7070-7764	con	SY_0.15	2.62366	8.08959	1.62448	0.0054	0.0409861	yes
ENSGALG00000035155	AADN04012245.1:5949-7351	con	SY_0.15	2.19167	6.73444	1.61953	0.0002	0.00296127	yes
EFCAB10	1:14012403-14013602	con	SY_0.15	23.6167	72.4698	1.61757	0.00015	0.00237699	yes
FXYD2	24:5375782-5377024	con	SY_0.15	30.022	92.0974	1.61714	0.00045	0.00590102	yes
MYOM2	3:91089248-91163384	con	SY_0.15	1.44627	4.43128	1.61539	5e-05	0.000905823	yes
ENSGALG00000027534	13:13010725-13018170	con	SY_0.15	70.2951	215.357	1.61523	5e-05	0.000905823	yes
ENSGALG00000032405	AADN04000661.1:61201-67038	con	SY_0.15	0.668104	2.0379	1.60894	0.00045	0.00590102	yes
ENSGALG00000036119	AADN04004278.1:5211-7947	con	SY_0.15	2.60867	7.95164	1.60794	5e-05	0.000905823	yes
NOXA1	17:1392827-1406063	con	SY_0.15	13.3048	40.4687	1.60486	5e-05	0.000905823	yes
CILP	10:17819515-17827876	con	SY_0.15	0.276411	0.836532	1.59761	0.001	0.0111658	yes
ENSGALG00000039647	KQ759707.1:814-6252	con	SY_0.15	37.1216	110.907	1.57903	5e-05	0.000905823	yes
PTN	1:57724422-57794404	con	SY_0.15	29.1631	87.0672	1.57799	5e-05	0.000905823	yes
DUSP6	1:43288466-43292808	con	SY_0.15	9.67416	28.7233	1.57001	5e-05	0.000905823	yes
ENSGALG00000001369	26:3151010-3153878	con	SY_0.15	0.870272	2.58311	1.56957	0.00095	0.010678	yes
PKD2	4:45959957-45974346	con	SY_0.15	17.4071	51.6518	1.56914	5e-05	0.000905823	yes
AGR2	2:28627302-28631323	con	SY_0.15	504.189	1494.33	1.56747	5e-05	0.000905823	yes
BARX2B	24:1345214-1371346	con	SY_0.15	3.9431	11.6629	1.56452	5e-05	0.000905823	yes
ENSGALG00000043121	AADN04000661.1:74699-95847	con	SY_0.15	1.70137	5.0208	1.56122	5e-05	0.000905823	yes
NIPAL1	4:66993586-66998001	con	SY_0.15	3.97551	11.7078	1.55826	5e-05	0.000905823	yes
ESYT3	7:28438095-28465232	con	SY_0.15	1.92558	5.60169	1.54057	5e-05	0.000905823	yes
HPSE	4:46759038-46763458	con	SY_0.15	1.37712	4.00117	1.53877	0.00015	0.00237699	yes
ENSGALG00000024136	25:1069828-1071422	con	SY_0.15	10.4138	30.2031	1.5362	5e-05	0.000905823	yes
KIF1A	9:4834318-4867054	con	SY_0.15	1.11845	3.23692	1.53312	5e-05	0.000905823	yes
BFSP1	3:11489064-11507709	con	SY_0.15	1.79457	5.1898	1.53204	5e-05	0.000905823	yes
ENSGALG00000027712	25:1331122-1334664	con	SY_0.15	1.65929	4.79638	1.53138	0.0002	0.00296127	yes
CRYBA1	19:5961994-5965823	con	SY_0.15	2.2832	6.59171	1.5296	0.00235	0.0217379	yes
ENSGALG00000033467	AADN04015740.1:737-2737	con	SY_0.15	1.71132	4.93245	1.5272	0.00215	0.0202477	yes
ENSGALG00000036187	AADN04008251.1:2042-3583	con	SY_0.15	0.91705	2.63174	1.52094	0.00685	0.04879	yes
ENSGALG00000005964	4:3087983-3093028	con	SY_0.15	6.85806	19.6642	1.5197	5e-05	0.000905823	yes
NOX5	10:19302362-19308218	con	SY_0.15	0.395063	1.12717	1.51255	0.00325	0.0278369	yes
ENSGALG00000043925	28:2016302-2018157	con	SY_0.15	0.814338	2.31605	1.50797	0.00035	0.00477957	yes
CCR7	27:4891170-4899901	con	SY_0.15	2.17399	6.12086	1.49339	5e-05	0.000905823	yes
GPC4	4:3791473-3853513	con	SY_0.15	89.729	250.966	1.48384	5e-05	0.000905823	yes
KRT20	27:4939478-4943858	con	SY_0.15	84.1895	233.28	1.47035	5e-05	0.000905823	yes
ENSGALG00000011450	13:13565094-13570421	con	SY_0.15	8.24768	22.8086	1.46751	5e-05	0.000905823	yes
ARSI	13:13183769-13186780	con	SY_0.15	0.76515	2.11114	1.46421	0.00155	0.0158191	yes
SLC17A9	20:8633022-8647973	con	SY_0.15	1.40068	3.86101	1.46285	5e-05	0.000905823	yes
HS6ST2	4:3612122-3713509	con	SY_0.15	21.3933	58.602	1.45379	5e-05	0.000905823	yes
MIDN	28:3074462-3086759	con	SY_0.15	10.9402	29.9069	1.45084	5e-05	0.000905823	yes
EEPD1	2:46965661-47025197	con	SY_0.15	7.52031	20.5308	1.44892	5e-05	0.000905823	yes
ENSGALG00000010169	3:30323970-30326268	con	SY_0.15	0.927714	2.5212	1.44236	0.0009	0.0102869	yes
TXK	4:66975728-66988120	con	SY_0.15	0.563916	1.5262	1.43639	0.00545	0.041273	yes
WNT11	1:193938734-193964975	con	SY_0.15	2.56815	6.93253	1.43265	5e-05	0.000905823	yes
ATF3	3:21874341-21876244	con	SY_0.15	11.0195	29.6908	1.42996	0.0004	0.00536492	yes
SOX9	18:8866455-8869366	con	SY_0.15	14.7872	39.7032	1.4249	5e-05	0.000905823	yes
SDC1	3:102005546-102025143	con	SY_0.15	107.015	287	1.42324	5e-05	0.000905823	yes
ENSGALG00000020679	6:27542959-27567902	con	SY_0.15	0.891294	2.38978	1.42291	0.00125	0.0132365	yes
ENSGALG00000042557	3:3642403-3648617	con	SY_0.15	1.427	3.81894	1.42018	0.0034	0.0288659	yes
GADD45B	28:3324493-3327985	con	SY_0.15	41.9419	111.93	1.41613	5e-05	0.000905823	yes
ENSGALG00000042020	4:50050412-50052876	con	SY_0.15	32.9345	87.8559	1.41554	5e-05	0.000905823	yes
ENSGALG00000028341	28:2684353-2687041	con	SY_0.15	1.15702	3.07863	1.41187	0.00155	0.0158191	yes
ENSGALG00000030111	2:44982605-44984766	con	SY_0.15	0.445172	1.18237	1.40925	0.00505	0.0389855	yes
TSPAN19	1:41728239-41737904	con	SY_0.15	1.58102	4.1756	1.40113	0.0054	0.0409861	yes
ITM2C	9:5386984-5403209	con	SY_0.15	21.5653	56.9131	1.40005	5e-05	0.000905823	yes
GKN2	22:268676-272038	con	SY_0.15	741.638	1949.79	1.39453	5e-05	0.000905823	yes
JUND	28:3991325-3992297	con	SY_0.15	54.2552	142.606	1.3942	5e-05	0.000905823	yes
KIAA0040	8:7091406-7091736	con	SY_0.15	49.6805	130.528	1.39361	0.00205	0.0194959	yes
ENSGALG00000011404	4:49592535-49595831	con	SY_0.15	5.75892	15.1123	1.39185	5e-05	0.000905823	yes
ENSGALG00000003196	6:9290893-9300707	con	SY_0.15	22.009	57.69	1.39023	5e-05	0.000905823	yes
ENSGALG00000033672	AADN04001431.1:6003-15863	con	SY_0.15	8.60638	22.4361	1.38235	5e-05	0.000905823	yes
PUS1	15:2631282-2634476	con	SY_0.15	16.5196	43.0612	1.38221	5e-05	0.000905823	yes
CA2	2:123391256-123408736	con	SY_0.15	132.46	344.872	1.3805	5e-05	0.000905823	yes
ENSGALG00000003921	20:5248042-5254471	con	SY_0.15	29.1115	75.7302	1.37928	5e-05	0.000905823	yes
LDLRAD1	8:25201223-25204045	con	SY_0.15	12.5014	32.4516	1.37619	0.0005	0.00640767	yes
ATP8B3	28:2286961-2297493	con	SY_0.15	4.44048	11.5083	1.37389	5e-05	0.000905823	yes
ENSGALG00000036044	5:278454-291212	con	SY_0.15	2.41261	6.2399	1.37093	0.0003	0.00419411	yes
NRXN1	3:6563214-7213964	con	SY_0.15	0.279251	0.721277	1.36899	0.00075	0.00889549	yes
NKIRAS1	2:37318199-37327078	con	SY_0.15	3.8705	9.96417	1.36423	0.0008	0.0093573	yes
ENSGALG00000045182	17:1474149-1480217	con	SY_0.15	10.5329	26.9633	1.35609	5e-05	0.000905823	yes
ENSGALG00000016326	1:118163052-118171318	con	SY_0.15	4.54852	11.59	1.34941	0.0007	0.00847326	yes
ADGRG2	1:120395078-120415594	con	SY_0.15	7.63154	19.4378	1.34882	5e-05	0.000905823	yes
ENSGALG00000031149	26:2653655-2657098	con	SY_0.15	9.29022	23.5516	1.34204	5e-05	0.000905823	yes
ENSGALG00000022802	KQ759337.1:4295-14033	con	SY_0.15	0.543813	1.3775	1.34087	0.00665	0.0477931	yes
ENSGALG00000012277	1:51010582-51013540	con	SY_0.15	5.21414	13.1885	1.33877	5e-05	0.000905823	yes
NR13	10:8889123-8891224	con	SY_0.15	9.10818	22.939	1.33257	0.00205	0.0194959	yes
ENSGALG00000036766	AADN04011679.1:22-7719	con	SY_0.15	1.08514	2.72877	1.33036	0.00325	0.0278369	yes
ENSGALG00000002461	15:2725943-2728629	con	SY_0.15	9.30843	23.3809	1.32872	5e-05	0.000905823	yes
GPX2	5:305527-306315	con	SY_0.15	3.11474	7.81946	1.32796	0.0035	0.0294013	yes
FAM3D	12:11897290-11901425	con	SY_0.15	9.39976	23.5867	1.32728	5e-05	0.000905823	yes
ENSGALG00000031183	23:196438-201435	con	SY_0.15	6.12618	15.3138	1.32178	5e-05	0.000905823	yes
NABP1	7:8149373-8157458	con	SY_0.15	50.2391	125.568	1.32159	5e-05	0.000905823	yes
ENSGALG00000009095	3:7621410-7640925	con	SY_0.15	0.861294	2.15269	1.32157	0.00165	0.0166018	yes
IFITM10	5:14141049-14147360	con	SY_0.15	4.28005	10.6192	1.31098	0.0041	0.0331652	yes
ENSGALG00000025738	3:39921767-39926303	con	SY_0.15	46.8141	115.075	1.29757	5e-05	0.000905823	yes
MYC	2:139845724-139849615	con	SY_0.15	2.66998	6.5511	1.29491	5e-05	0.000905823	yes
GFPT2	13:13929616-13940653	con	SY_0.15	2.60953	6.38297	1.29044	0.0002	0.00296127	yes
SIAT9	4:85969309-85990133	con	SY_0.15	40.2411	98.3992	1.28998	5e-05	0.000905823	yes
SLC41A3	12:10499368-10520263	con	SY_0.15	20.2799	49.5205	1.28798	5e-05	0.000905823	yes
ENSGALG00000008040	15:10972570-10982701	con	SY_0.15	9.08896	22.1417	1.28458	5e-05	0.000905823	yes
DUSP8	5:14163586-14184836	con	SY_0.15	7.43266	18.1062	1.28453	5e-05	0.000905823	yes
FAM3B	1:108910670-108917505	con	SY_0.15	10.1543	24.6681	1.28055	0.0004	0.00536492	yes
ENSGALG00000028815	24:6257930-6267229	con	SY_0.15	1.01766	2.46973	1.2791	0.00195	0.0188361	yes
ENSGALG00000033498	5:15945532-15981209	con	SY_0.15	56.1571	136.156	1.27772	5e-05	0.000905823	yes
TXNDC15	13:15756932-15759926	con	SY_0.15	8.07113	19.5061	1.27308	5e-05	0.000905823	yes
RRS1	2:115487419-115488492	con	SY_0.15	2.44888	5.91261	1.27167	0.0039	0.0319484	yes
ATP13A5	9:13147007-13173536	con	SY_0.15	58.9486	142.029	1.26865	5e-05	0.000905823	yes
ENSGALG00000021451	11:1103752-1106406	con	SY_0.15	3.57722	8.60537	1.2664	0.00105	0.0115903	yes
SLC29A4	14:4092938-4098100	con	SY_0.15	3.8874	9.351	1.26632	0.00035	0.00477957	yes
ENSGALG00000001885	19:4149873-4151555	con	SY_0.15	84.3875	202.831	1.26518	5e-05	0.000905823	yes
CERK	1:16132581-16175969	con	SY_0.15	13.6002	32.6646	1.2641	5e-05	0.000905823	yes
CH25H	6:19330372-19331756	con	SY_0.15	2.44485	5.87086	1.26383	0.00245	0.0225244	yes
ENSGALG00000039468	9:22370705-22384584	con	SY_0.15	8.05748	19.3338	1.26273	5e-05	0.000905823	yes
ENSGALG00000029857	2:4084785-4086964	con	SY_0.15	12.0518	28.8552	1.25959	5e-05	0.000905823	yes
ISCA2	5:37966201-37967271	con	SY_0.15	12.373	29.5996	1.25839	0.0003	0.00419411	yes
ACSF2	18:10433381-10468658	con	SY_0.15	93.1223	222.733	1.25812	5e-05	0.000905823	yes
LCAT	11:1094449-1100820	con	SY_0.15	4.17209	9.97622	1.25772	5e-05	0.000905823	yes
KAZALD1	6:23063010-23067024	con	SY_0.15	1.92974	4.6121	1.25702	0.0015	0.0154252	yes
Zfp36l1	5:28356159-28358209	con	SY_0.15	133.558	317.305	1.24841	5e-05	0.000905823	yes
ENSGALG00000044832	Z:39808981-39809938	con	SY_0.15	6.29299	14.9348	1.24686	0.0009	0.0102869	yes
ENSGALG00000037611	Z:9259341-9296314	con	SY_0.15	0.435894	1.03306	1.24487	0.0069	0.0490429	yes
RXRG	8:5154110-5168109	con	SY_0.15	5.94139	14.0763	1.24439	5e-05	0.000905823	yes
GRIK1	1:104161062-104236516	con	SY_0.15	1.37113	3.23744	1.23949	0.00175	0.0173246	yes
ENSGALG00000035362	21:4390404-4404128	con	SY_0.15	7.28489	17.1897	1.23856	5e-05	0.000905823	yes
RAB37	18:10524514-10529085	con	SY_0.15	2.40066	5.65528	1.23617	0.00365	0.0303972	yes
ENSGALG00000038442	1:46016847-46028306	con	SY_0.15	5.47392	12.8728	1.23368	0.0003	0.00419411	yes
PLCB2	5:622098-658176	con	SY_0.15	1.74538	4.07614	1.22366	5e-05	0.000905823	yes
ENSGALG00000030592	17:6086304-6102773	con	SY_0.15	5.98812	13.9614	1.22127	0.00165	0.0166018	yes
RXFP1	4:22025963-22073637	con	SY_0.15	15.7132	36.5671	1.21857	5e-05	0.000905823	yes
NFKBIZ	1:85395265-85411616	con	SY_0.15	3.19613	7.43468	1.21795	5e-05	0.000905823	yes
LAMB3	26:3114634-3124587	con	SY_0.15	1.49648	3.48079	1.21784	0.00015	0.00237699	yes
ENSGALG00000036670	AADN04000866.1:11268-32015	con	SY_0.15	1.69078	3.9146	1.21118	0.00335	0.0285129	yes
ENSGALG00000032108	24:3788079-3791070	con	SY_0.15	2.07122	4.794	1.21075	0.0001	0.00169162	yes
ENSGALG00000023622	Z:9164720-9165903	con	SY_0.15	8.7591	20.2189	1.20685	0.00265	0.0238606	yes
CPXM1	AADN04000623.1:106098-113274	con	SY_0.15	0.998872	2.30427	1.20594	0.00385	0.0317115	yes
TFCP2L1	7:26189843-26218128	con	SY_0.15	84.5073	194.855	1.20525	5e-05	0.000905823	yes
WNT1	KQ759553.1:25469-28139	con	SY_0.15	4.79499	11.0543	1.20501	0.0012	0.0128174	yes
NDUFB6	14:13454269-13456392	con	SY_0.15	148.707	342.1	1.20195	5e-05	0.000905823	yes
CLDN10	1:146034758-146094044	con	SY_0.15	369.531	847.875	1.19816	5e-05	0.000905823	yes
PLCD1	2:4635396-4683167	con	SY_0.15	6.49259	14.8737	1.1959	5e-05	0.000905823	yes
GPC3	4:3865351-3986168	con	SY_0.15	0.756536	1.72744	1.19116	0.0068	0.0486387	yes
C2orf88	7:192382-196571	con	SY_0.15	8.61785	19.6596	1.18983	0.00075	0.00889549	yes
ENSGALG00000010203	8:20988108-20994448	con	SY_0.15	9.65571	22.013	1.1889	5e-05	0.000905823	yes
ENSGALG00000007728	15:10154962-10165658	con	SY_0.15	5.72071	13.0411	1.1888	5e-05	0.000905823	yes
HERPUD1	11:661330-665530	con	SY_0.15	59.4839	135.2	1.18452	5e-05	0.000905823	yes
C14orf159	5:44254118-44275768	con	SY_0.15	2.18098	4.95018	1.18251	0.0004	0.00536492	yes
SLC37A2	24:213691-220807	con	SY_0.15	1.90862	4.33001	1.18184	0.0042	0.0336921	yes
ENSGALG00000045251	24:5494864-5498918	con	SY_0.15	1.37622	3.121	1.1813	0.0035	0.0294013	yes
PCYOX1L	13:8509617-8512241	con	SY_0.15	22.8831	51.8824	1.18097	5e-05	0.000905823	yes
RGS2	8:3575630-3578451	con	SY_0.15	36.115	81.5437	1.17498	5e-05	0.000905823	yes
PLPPR4	8:12223291-12251722	con	SY_0.15	3.42056	7.7204	1.17444	0.00035	0.00477957	yes
ENSGALG00000042293	3:24875244-24897060	con	SY_0.15	0.939795	2.11931	1.17318	0.00695	0.0493465	yes
ENSGALG00000006325	12:10728707-10770062	con	SY_0.15	1.20298	2.70676	1.16995	0.00285	0.0252746	yes
APELA	4:23934180-23936941	con	SY_0.15	10.6444	23.9491	1.16988	0.0053	0.0403856	yes
NT5DC3	1:54798749-54818100	con	SY_0.15	7.52131	16.8287	1.16187	5e-05	0.000905823	yes
PCDH1	13:2037708-2061000	con	SY_0.15	6.15222	13.7453	1.15976	5e-05	0.000905823	yes
CCNO	Z:16730623-16731687	con	SY_0.15	4.37948	9.77105	1.15775	0.0067	0.0480759	yes
ACOT11	8:25308307-25318308	con	SY_0.15	15.8364	35.3286	1.15759	5e-05	0.000905823	yes
PDK4	2:23933442-23942823	con	SY_0.15	5.34952	11.9028	1.15382	5e-05	0.000905823	yes
MST1	12:2456732-2465055	con	SY_0.15	5.21963	11.6074	1.15303	0.0043	0.0343113	yes
ENSGALG00000023742	7:6580436-6603208	con	SY_0.15	1.89016	4.19704	1.15086	0.0006	0.00743571	yes
ENSGALG00000041329	AADN04005320.1:4659-6021	con	SY_0.15	4.26175	9.45989	1.15038	0.0011	0.0119761	yes
PMP22	18:2352299-2365897	con	SY_0.15	83.1653	184.546	1.14993	5e-05	0.000905823	yes
SETBP1	Z:2631389-2878777	con	SY_0.15	1.3251	2.91891	1.13933	5e-05	0.000905823	yes
B3GNT4	15:5834813-5835917	con	SY_0.15	3.67899	8.09992	1.1386	0.0022	0.0206039	yes
WBP1L	6:23364622-23386208	con	SY_0.15	32.3018	70.9905	1.13601	5e-05	0.000905823	yes
ENSGALG00000040785	4:68878950-68881771	con	SY_0.15	7.51024	16.5012	1.13564	0.00345	0.0291078	yes
SOCS3	18:9931035-9933083	con	SY_0.15	1.89941	4.1703	1.1346	0.0042	0.0336921	yes
FAM110D	23:3204811-3205849	con	SY_0.15	6.1937	13.556	1.13006	0.00125	0.0132365	yes
PGLYRP2	KQ759549.1:40469-46056	con	SY_0.15	6.53237	14.2964	1.12997	0.0002	0.00296127	yes
ABI3BP	1:84985336-85117095	con	SY_0.15	28.4908	62.2132	1.12672	5e-05	0.000905823	yes
ENSGALG00000032190	26:20953-32029	con	SY_0.15	4.14546	9.02835	1.12293	5e-05	0.000905823	yes
KY	9:3683202-3694882	con	SY_0.15	2.30469	5.00416	1.11856	0.00045	0.00590102	yes
C1D	3:11233264-11246857	con	SY_0.15	21.351	46.3381	1.11789	5e-05	0.000905823	yes
EPHA2	21:4315015-4323502	con	SY_0.15	6.0334	13.0743	1.11569	5e-05	0.000905823	yes
GDPD2	4:2546261-2553430	con	SY_0.15	6.85173	14.7803	1.10913	0.00015	0.00237699	yes
ENSGALG00000046460	AADN04008278.1:20-10271	con	SY_0.15	8.40714	18.1266	1.10842	0.0056	0.0421964	yes
AVPR1A	1:33298675-33301273	con	SY_0.15	14.202	30.57	1.10602	5e-05	0.000905823	yes
SPRY1	4:53714524-53715490	con	SY_0.15	8.59993	18.5079	1.10574	0.0005	0.00640767	yes
ATP13A2	21:4407475-4423378	con	SY_0.15	23.416	50.3492	1.10447	5e-05	0.000905823	yes
PLEKHN1	21:2848493-2859631	con	SY_0.15	1.29657	2.78638	1.10369	0.0065	0.0470398	yes
VLDLR	Z:26557584-26572292	con	SY_0.15	13.6455	29.307	1.10282	5e-05	0.000905823	yes
ENSGALG00000041909	33:1607019-1608482	con	SY_0.15	8.1207	17.4058	1.09989	0.0006	0.00743571	yes
KLF2	28:4398875-4401204	con	SY_0.15	20.401	43.715	1.09949	5e-05	0.000905823	yes
ULK1	15:2638996-2708090	con	SY_0.15	10.1297	21.658	1.0963	5e-05	0.000905823	yes
TNFSF15	17:3061246-3074511	con	SY_0.15	1.65064	3.51493	1.09047	0.00685	0.04879	yes
RASSF5	26:2496280-2506102	con	SY_0.15	0.602567	1.27846	1.08522	0.0064	0.0466404	yes
HSPA5	17:10076956-10081027	con	SY_0.15	302.897	641.781	1.08325	0.0025	0.0228598	yes
ENSGALG00000040832	28:2853994-2865980	con	SY_0.15	107.142	226.747	1.08156	5e-05	0.000905823	yes
SIVA1	5:51660595-51662558	con	SY_0.15	8.8134	18.5967	1.07727	0.0018	0.0177288	yes
ENSGALG00000028015	9:12963816-12974386	con	SY_0.15	73.7824	155.648	1.07694	0.0001	0.00169162	yes
RPS6KA	23:117565-147202	con	SY_0.15	14.9369	31.3132	1.06789	5e-05	0.000905823	yes
MTMR11	25:925458-932068	con	SY_0.15	30.3598	63.6283	1.06751	5e-05	0.000905823	yes
ENSGALG00000011806	7:28071746-28077677	con	SY_0.15	11.305	23.6711	1.06617	5e-05	0.000905823	yes
CCNA1	1:172568580-172574262	con	SY_0.15	2.8144	5.89216	1.06597	0.00145	0.0149793	yes
ENSGALG00000015056	2:103493135-103529171	con	SY_0.15	3.30265	6.91139	1.06535	5e-05	0.000905823	yes
ENSGALG00000004627	8:7557777-7561205	con	SY_0.15	1.99781	4.17169	1.06221	0.00665	0.0477931	yes
S100A6	25:1874282-1875569	con	SY_0.15	858.324	1790.84	1.06104	5e-05	0.000905823	yes
TRIB1	2:138969887-138972814	con	SY_0.15	3.44942	7.19404	1.06045	0.00575	0.0430153	yes
SERINC2	23:612114-618224	con	SY_0.15	18.8441	39.2996	1.0604	5e-05	0.000905823	yes
ENSGALG00000023542	21:6616877-6622890	con	SY_0.15	7.88098	16.431	1.05997	0.0006	0.00743571	yes
OAF	24:3833145-3843905	con	SY_0.15	79.3889	165.51	1.05991	5e-05	0.000905823	yes
C12orf45	1:54370468-54374950	con	SY_0.15	26.6381	55.5236	1.05961	5e-05	0.000905823	yes
ENSGALG00000027805	10:2279142-2280927	con	SY_0.15	3.07491	6.40592	1.05886	0.00665	0.0477931	yes
DBN1	13:10144881-10154247	con	SY_0.15	4.89664	10.1983	1.05846	0.00015	0.00237699	yes
BCAR1	11:2033490-2038419	con	SY_0.15	26.3309	54.8179	1.05789	5e-05	0.000905823	yes
PTTG1IP	9:5153143-5158994	con	SY_0.15	15.3352	31.7977	1.05208	5e-05	0.000905823	yes
ENSGALG00000005747	4:2451343-2452399	con	SY_0.15	5.66094	11.6635	1.04289	0.00175	0.0173246	yes
IFITM3	5:1552702-1554224	con	SY_0.15	21.4691	44.2064	1.04199	0.0059	0.043919	yes
PDE8A	10:10947157-11053735	con	SY_0.15	5.11214	10.5177	1.04082	5e-05	0.000905823	yes
ENSGALG00000039028	AADN04005455.1:9276-13360	con	SY_0.15	13.985	28.7548	1.03992	5e-05	0.000905823	yes
LGALS3	5:56397121-56400208	con	SY_0.15	164.169	337.292	1.03882	5e-05	0.000905823	yes
PIK3R5	18:2023338-2072419	con	SY_0.15	0.678616	1.39346	1.03801	0.00515	0.0396219	yes
TMPRSS13	24:5391161-5394288	con	SY_0.15	34.5042	70.688	1.03469	5e-05	0.000905823	yes
SCARA5	3:105581244-105594207	con	SY_0.15	8.07008	16.4961	1.03147	5e-05	0.000905823	yes
TMEM51	21:4948041-4953951	con	SY_0.15	20.9241	42.7615	1.03115	5e-05	0.000905823	yes
ENSGALG00000009606	6:31447761-31460698	con	SY_0.15	3.41697	6.97772	1.03004	0.0006	0.00743571	yes
ENSGALG00000031688	7:13630694-13637673	con	SY_0.15	3.92508	7.9882	1.02515	0.00045	0.00590102	yes
TNFRSF6B	20:9851269-9855152	con	SY_0.15	5.97981	12.1029	1.01718	0.00215	0.0202477	yes
FST	Z:16072648-16079246	con	SY_0.15	6.06734	12.2678	1.01574	5e-05	0.000905823	yes
SSTR1	5:37394622-37395903	con	SY_0.15	6.4721	13.0765	1.01467	0.00155	0.0158191	yes
CREM	2:13001321-13032921	con	SY_0.15	79.0898	159.63	1.01317	5e-05	0.000905823	yes
EVA1C	1:104968386-104988771	con	SY_0.15	4.1465	8.36865	1.0131	0.0051	0.0393043	yes
TSPAN8	1:36146150-36163273	con	SY_0.15	11.8764	23.9398	1.01131	0.00095	0.010678	yes
ENSGALG00000039595	1:53427815-53497435	con	SY_0.15	3.82069	7.6973	1.01052	0.00045	0.00590102	yes
MAB21L3	1:80302816-80325374	con	SY_0.15	10.269	20.6383	1.00703	0.00055	0.00690459	yes
C1QA	21:6088914-6090874	con	SY_0.15	10.3395	20.7556	1.00534	0.00015	0.00237699	yes
FBLN7	3:3223263-3229095	con	SY_0.15	1.74101	3.49479	1.00528	0.004	0.0326096	yes
NOCT	4:29428816-29433345	con	SY_0.15	9.64467	19.3483	1.0044	5e-05	0.000905823	yes
GADD45G	Z:43730713-43732242	con	SY_0.15	63.0198	126.326	1.00327	5e-05	0.000905823	yes
ELL	28:3910629-3946424	con	SY_0.15	30.8946	61.928	1.00324	5e-05	0.000905823	yes
ENSGALG00000006608	5:14113197-14118876	con	SY_0.15	4.29615	8.60646	1.00238	0.0003	0.00419411	yes
PRELID3A	2:97422839-97433227	con	SY_0.15	6.12203	12.248	1.00047	5e-05	0.000905823	yes
QSOX1	8:6001333-6008935	con	SY_0.15	313.681	627.412	1.00012	0.0001	0.00169162	yes
ITSN1	1:105492243-105575073	con	SY_0.15	17.6937	8.84616	-1.00011	5e-05	0.000905823	yes
FIBIN	5:3463975-3465700	con	SY_0.15	532.38	266.15	-1.00022	0.002	0.0191144	yes
TROVE2	8:3508643-3516114	con	SY_0.15	10.1382	5.04879	-1.00579	0.0002	0.00296127	yes
PRRG1	1:113283936-113314035	con	SY_0.15	24.0974	11.9925	-1.00675	5e-05	0.000905823	yes
MIGA2	17:5923594-5935776	con	SY_0.15	40.51	20.1508	-1.00744	5e-05	0.000905823	yes
EVPL	18:4597351-4613120	con	SY_0.15	26.1233	12.9936	-1.00754	5e-05	0.000905823	yes
CAV1	1:25060565-25074918	con	SY_0.15	60.2079	29.9359	-1.00808	0.0004	0.00536492	yes
LONRF3	4:16763541-16777172	con	SY_0.15	40.3821	20.0306	-1.01151	5e-05	0.000905823	yes
SMIM5	18:4833138-4870020	con	SY_0.15	54.8159	27.1608	-1.01307	0.00465	0.0364803	yes
TSPAN4	5:15271750-15336034	con	SY_0.15	51.4682	25.4696	-1.0149	5e-05	0.000905823	yes
LNPEP	Z:51602731-51651196	con	SY_0.15	11.2075	5.54549	-1.01508	5e-05	0.000905823	yes
USP12	1:176357321-176388427	con	SY_0.15	24.8549	12.2747	-1.01785	0.0001	0.00169162	yes
ZDHHC8	15:1325921-1408363	con	SY_0.15	5.59372	2.75734	-1.02053	0.0002	0.00296127	yes
C1QTNF2	13:7837677-7845187	con	SY_0.15	2.38875	1.17693	-1.02123	0.0054	0.0409861	yes
ADAMTS5	1:103067329-103106355	con	SY_0.15	2.64852	1.30478	-1.02138	0.00545	0.041273	yes
Lpin1	3:97873226-97919894	con	SY_0.15	5.82746	2.86956	-1.02204	0.00015	0.00237699	yes
HNF4G	2:119132531-119162556	con	SY_0.15	5.24214	2.57634	-1.02483	0.00495	0.0383448	yes
ANKRD50	4:53218479-53254834	con	SY_0.15	7.6778	3.7734	-1.02483	5e-05	0.000905823	yes
SAMD12	2:136229888-136298472	con	SY_0.15	35.8542	17.6096	-1.02577	0.0044	0.0349034	yes
ITGAV	7:1319203-1364895	con	SY_0.15	30.267	14.861	-1.02622	5e-05	0.000905823	yes
ENSGALG00000000311	22:844643-915617	con	SY_0.15	4.13799	2.02605	-1.03026	5e-05	0.000905823	yes
SEPSECS	4:74019755-74043563	con	SY_0.15	51.7428	25.3167	-1.03127	5e-05	0.000905823	yes
PIAS1	10:19107953-19156499	con	SY_0.15	22.3015	10.9114	-1.03131	5e-05	0.000905823	yes
FAT4	4:52866489-52987950	con	SY_0.15	1.32152	0.646139	-1.03228	5e-05	0.000905823	yes
ENSGALG00000042110	7:6970350-7039655	con	SY_0.15	4.76103	2.32767	-1.03239	0.0053	0.0403856	yes
FMO3	8:4824821-4831264	con	SY_0.15	13.6088	6.65113	-1.03287	5e-05	0.000905823	yes
ENSGALG00000032750	26:1156251-1162125	con	SY_0.15	3.53962	1.7295	-1.03324	0.0005	0.00640767	yes
PTPRB	1:35846166-35891845	con	SY_0.15	8.64869	4.22513	-1.03349	5e-05	0.000905823	yes
ENSGALG00000044716	4:54141943-54156023	con	SY_0.15	6.01886	2.93908	-1.03413	0.00015	0.00237699	yes
ENSGALG00000009480	1:27184786-27262852	con	SY_0.15	2.30531	1.12531	-1.03464	0.0044	0.0349034	yes
ENSGALG00000023936	21:2221201-2229269	con	SY_0.15	11.0273	5.37675	-1.03627	0.00075	0.00889549	yes
ENSGALG00000015219	2:107995286-108042299	con	SY_0.15	15.2742	7.44653	-1.03646	0.00045	0.00590102	yes
ENSGALG00000006138	20:9941291-9949052	con	SY_0.15	7.28774	3.55021	-1.03757	5e-05	0.000905823	yes
SLC16A7	1:32086286-32120482	con	SY_0.15	6.64936	3.23661	-1.03873	0.00015	0.00237699	yes
CLSTN2	9:6212444-6381940	con	SY_0.15	2.3684	1.15277	-1.03881	0.00295	0.02589	yes
DICER1	5:45907274-45950884	con	SY_0.15	6.63368	3.22287	-1.04146	5e-05	0.000905823	yes
cNFI-A	8:27133820-27369637	con	SY_0.15	34.4643	16.7412	-1.0417	5e-05	0.000905823	yes
PTGR1	Z:66488488-66508364	con	SY_0.15	45.1531	21.9173	-1.04276	5e-05	0.000905823	yes
NHLRC2	6:27592398-27623494	con	SY_0.15	5.61599	2.72574	-1.04289	0.0001	0.00169162	yes
ENSGALG00000005349	14:6029102-6043043	con	SY_0.15	1.97213	0.957177	-1.0429	0.0065	0.0470398	yes
SPOPL	7:31558413-31573289	con	SY_0.15	11.8961	5.76724	-1.04453	0.0003	0.00419411	yes
ENSGALG00000017204	1:185466217-185503920	con	SY_0.15	4.76175	2.30753	-1.04514	0.0012	0.0128174	yes
RPIA	4:86722232-86737031	con	SY_0.15	178.952	86.6006	-1.04713	5e-05	0.000905823	yes
PANK3	13:4684398-4691245	con	SY_0.15	39.8609	19.2858	-1.04744	5e-05	0.000905823	yes
ZDHHC21	Z:31657272-31700916	con	SY_0.15	21.2464	10.2756	-1.04799	0.00035	0.00477957	yes
SQLE	2:138793477-138807608	con	SY_0.15	28.5013	13.7843	-1.048	5e-05	0.000905823	yes
NADK2	Z:10993358-11023191	con	SY_0.15	7.91084	3.82434	-1.04862	0.00145	0.0149793	yes
GAS7	18:230966-334718	con	SY_0.15	3.59811	1.73928	-1.04875	0.0026	0.0235042	yes
ENSGALG00000034674	1:177395490-177410045	con	SY_0.15	11.0542	5.3362	-1.05071	0.0002	0.00296127	yes
IKZF2	7:3645915-3763784	con	SY_0.15	4.15181	2.00314	-1.05148	0.00185	0.0181289	yes
USP53	4:55086275-55109473	con	SY_0.15	4.99468	2.40722	-1.05302	0.00015	0.00237699	yes
PLD5	3:35580788-35747135	con	SY_0.15	4.83206	2.32786	-1.05364	0.0042	0.0336921	yes
SPG20	1:172618671-172629426	con	SY_0.15	44.5023	21.4294	-1.05429	5e-05	0.000905823	yes
ENSGALG00000033360	5:45175751-45182316	con	SY_0.15	7.79915	3.75187	-1.05571	0.00235	0.0217379	yes
ZDHHC23	1:83045333-83052578	con	SY_0.15	12.0481	5.78675	-1.05798	5e-05	0.000905823	yes
PLCH1	9:23080039-23133003	con	SY_0.15	3.91397	1.87987	-1.058	5e-05	0.000905823	yes
PLBD1	1:48929923-48958286	con	SY_0.15	17.5106	8.40583	-1.05877	5e-05	0.000905823	yes
KIAA2022	4:12427662-12436332	con	SY_0.15	1.78828	0.857626	-1.06016	0.0014	0.0145628	yes
SH3TC1	4:81396417-81418574	con	SY_0.15	14.1339	6.77128	-1.06166	5e-05	0.000905823	yes
GALC	5:42900088-42935408	con	SY_0.15	21.267	10.1847	-1.06222	5e-05	0.000905823	yes
STON2	5:40913515-40968803	con	SY_0.15	9.92705	4.74933	-1.06364	5e-05	0.000905823	yes
PDE7A	2:115238662-115308978	con	SY_0.15	28.8098	13.7764	-1.06436	5e-05	0.000905823	yes
PLA2G15	11:77319-153913	con	SY_0.15	41.529	19.8545	-1.06465	5e-05	0.000905823	yes
AKAP11	1:166395610-166427361	con	SY_0.15	8.91359	4.26021	-1.06508	5e-05	0.000905823	yes
STXBP6	5:32441310-32495180	con	SY_0.15	37.8874	18.1065	-1.06521	5e-05	0.000905823	yes
SCRN1	2:33940268-33974780	con	SY_0.15	15.7966	7.54571	-1.06589	5e-05	0.000905823	yes
DENND4A	10:18113900-18150025	con	SY_0.15	6.04005	2.88184	-1.06757	5e-05	0.000905823	yes
QPCT	3:33675542-33688162	con	SY_0.15	6.45283	3.07494	-1.06937	0.0016	0.0162315	yes
MACC1	2:29988268-30018558	con	SY_0.15	6.25787	2.98167	-1.06955	0.0001	0.00169162	yes
FAM126B	7:11398839-11423739	con	SY_0.15	3.59539	1.71219	-1.07031	0.00355	0.0297291	yes
MTMR12	Z:9711745-9742375	con	SY_0.15	9.06069	4.31145	-1.07145	0.0002	0.00296127	yes
SPDEF	26:4355983-4357800	con	SY_0.15	108.59	51.6442	-1.07222	5e-05	0.000905823	yes
TMEM200A	3:57945698-57947168	con	SY_0.15	15.5876	7.40548	-1.07373	5e-05	0.000905823	yes
CACNA1D	12:7053448-7219032	con	SY_0.15	1.7286	0.821224	-1.07375	0.00045	0.00590102	yes
SMIM15	Z:19017607-19204794	con	SY_0.15	202.229	96.0076	-1.07477	5e-05	0.000905823	yes
KLHL14	2:106913657-106974273	con	SY_0.15	13.951	6.6132	-1.07695	5e-05	0.000905823	yes
ATP2C2	11:16970802-16992524	con	SY_0.15	382.957	181.474	-1.07742	0.00015	0.00237699	yes
ZNF618	17:1550304-1694877	con	SY_0.15	5.86385	2.77818	-1.07771	0.00015	0.00237699	yes
RBPJ	4:73717883-73740235	con	SY_0.15	13.9595	6.61234	-1.07802	0.0005	0.00640767	yes
PPP1R16B	20:3918079-3963460	con	SY_0.15	5.60561	2.65467	-1.07834	0.00025	0.00359538	yes
VAV3	8:992069-1140063	con	SY_0.15	27.0868	12.8215	-1.07902	5e-05	0.000905823	yes
PTPN21	5:43127201-43159385	con	SY_0.15	4.4368	2.09896	-1.07984	5e-05	0.000905823	yes
FRRS1	8:12096265-12113785	con	SY_0.15	27.8423	13.16	-1.08111	5e-05	0.000905823	yes
SLC13A5	19:9799045-9813490	con	SY_0.15	281.973	132.989	-1.08425	5e-05	0.000905823	yes
CTTNBP2	1:24474947-24550085	con	SY_0.15	4.62509	2.18107	-1.08445	5e-05	0.000905823	yes
STAM	2:19670925-19700789	con	SY_0.15	17.5864	8.2817	-1.08647	5e-05	0.000905823	yes
TEF	1:49698483-49713034	con	SY_0.15	65.2835	30.7089	-1.08806	5e-05	0.000905823	yes
ENSGALG00000017706	Z:61011124-61071967	con	SY_0.15	37.3448	17.5645	-1.08824	5e-05	0.000905823	yes
ENSGALG00000035761	2:22663993-22676382	con	SY_0.15	4.82113	2.26688	-1.08866	0.00385	0.0317115	yes
SACS	1:177637906-177668206	con	SY_0.15	1.40496	0.660213	-1.08953	5e-05	0.000905823	yes
CYP2U1	4:38240516-38250340	con	SY_0.15	11.6092	5.43293	-1.09546	0.0001	0.00169162	yes
CHMP4C	2:122037632-122051680	con	SY_0.15	87.8667	41.0739	-1.0971	5e-05	0.000905823	yes
TBC1D14	4:80453648-80515768	con	SY_0.15	46.3781	21.6687	-1.09783	5e-05	0.000905823	yes
ENSGALG00000034397	3:57378296-57417465	con	SY_0.15	9.48431	4.42636	-1.09942	5e-05	0.000905823	yes
ENSGALG00000016142	1:108921072-108942022	con	SY_0.15	29.8466	13.9292	-1.09945	0.00055	0.00690459	yes
SNX10	2:32275229-32308776	con	SY_0.15	15.1422	7.0596	-1.10092	0.0001	0.00169162	yes
PEAK1	10:2987919-3016419	con	SY_0.15	12.2438	5.70332	-1.10218	5e-05	0.000905823	yes
COL6A3	7:4808258-4861524	con	SY_0.15	11.3886	5.29953	-1.10365	5e-05	0.000905823	yes
PER3	21:272582-291803	con	SY_0.15	4.02209	1.8712	-1.10399	5e-05	0.000905823	yes
HIPK1	26:3733067-3803416	con	SY_0.15	62.6903	29.1398	-1.10525	5e-05	0.000905823	yes
ENSGALG00000014071	1:67751003-67983940	con	SY_0.15	57.0579	26.4755	-1.10777	5e-05	0.000905823	yes
SLC39A8	4:61121024-61141216	con	SY_0.15	767.958	356.064	-1.10889	5e-05	0.000905823	yes
MGAT5	7:30391777-30481854	con	SY_0.15	8.28537	3.8378	-1.11029	5e-05	0.000905823	yes
ENSGALG00000010513	6:35336652-35342219	con	SY_0.15	9.22498	4.26542	-1.11286	0.00305	0.0265268	yes
ENSGALG00000045939	2:55510517-55513949	con	SY_0.15	7.42443	3.42876	-1.11459	0.00375	0.031039	yes
KLHL36	11:17068156-17080221	con	SY_0.15	14.0331	6.48007	-1.11475	5e-05	0.000905823	yes
IPMK	6:5253420-5283874	con	SY_0.15	28.5828	13.1957	-1.11508	5e-05	0.000905823	yes
ENSGALG00000006717	5:14871235-14911577	con	SY_0.15	1.79324	0.827361	-1.11598	0.0003	0.00419411	yes
TP53INP1	2:126909066-127051879	con	SY_0.15	64.6577	29.8136	-1.11685	0.0042	0.0336921	yes
TRAF6	5:19483883-19564179	con	SY_0.15	12.8949	5.94123	-1.11797	0.0001	0.00169163	yes
RASGRF2	Z:63782411-63904890	con	SY_0.15	2.56481	1.18033	-1.11965	0.0005	0.00640767	yes
C3orf58	9:10928330-10941709	con	SY_0.15	9.35497	4.30334	-1.12028	0.0003	0.00419411	yes
ENSGALG00000039459	18:6011513-6014434	con	SY_0.15	75.3794	34.6604	-1.12088	0.00085	0.00982327	yes
PHIP	3:79785428-79884137	con	SY_0.15	8.16683	3.74658	-1.1242	5e-05	0.000905823	yes
ENSGALG00000046678	KQ759336.1:11618-18626	con	SY_0.15	3.10086	1.4178	-1.12901	0.0044	0.0349034	yes
BNC2	Z:32351222-32692277	con	SY_0.15	1.60469	0.733477	-1.12947	0.00105	0.0115903	yes
SP4	2:30491274-30515206	con	SY_0.15	14.805	6.75746	-1.13153	5e-05	0.000905823	yes
RSAD2	3:95406460-95415464	con	SY_0.15	4.14019	1.88427	-1.13569	0.00025	0.00359538	yes
GPATCH2L	5:38603360-38633448	con	SY_0.15	5.6369	2.55997	-1.13877	0.0004	0.00536492	yes
TMEM9	26:901104-904818	con	SY_0.15	51.378	23.3026	-1.14066	5e-05	0.000905823	yes
EFNB2	1:141049588-141090557	con	SY_0.15	15.5417	7.03548	-1.14342	0.0002	0.00296127	yes
HAS2	2:137467300-137485205	con	SY_0.15	169.027	76.5154	-1.14344	5e-05	0.000905823	yes
ENSGALG00000043572	3:40738383-40744280	con	SY_0.15	9.53858	4.31724	-1.14367	0.0001	0.00169162	yes
TMTC4	1:143892181-143945330	con	SY_0.15	11.3453	5.1344	-1.14383	5e-05	0.000905823	yes
RASL11B	4:66369834-66373520	con	SY_0.15	28.4751	12.873	-1.14535	5e-05	0.000905823	yes
PLEKHM3	7:12077099-12176465	con	SY_0.15	3.70157	1.67262	-1.14603	0.0005	0.00640767	yes
CREBRF	13:9155351-9173391	con	SY_0.15	12.9393	5.84121	-1.14742	0.0001	0.00169162	yes
INO80D	7:12652294-12683284	con	SY_0.15	2.35434	1.06229	-1.14814	0.00025	0.00359538	yes
DENND1B	8:2339756-2479306	con	SY_0.15	4.59072	2.06924	-1.14962	0.00015	0.00237699	yes
INPP4B	4:30289660-30557052	con	SY_0.15	2.54272	1.14598	-1.14979	0.00085	0.00982327	yes
COCH	5:34263827-34280520	con	SY_0.15	42.7008	19.2235	-1.15139	5e-05	0.000905823	yes
FOCAD	Z:34160760-34260236	con	SY_0.15	21.1147	9.4913	-1.15357	5e-05	0.000905823	yes
THSD7A	2:26317032-26546888	con	SY_0.15	19.5206	8.76809	-1.15467	5e-05	0.000905823	yes
HLF	18:5980975-6011456	con	SY_0.15	72.3744	32.5015	-1.15497	5e-05	0.000905823	yes
EGFR	2:51987049-52134485	con	SY_0.15	24.1126	10.8196	-1.15614	5e-05	0.000905823	yes
ENSGALG00000043669	4:47198236-47232926	con	SY_0.15	6.09915	2.73387	-1.15766	0.0002	0.00296127	yes
POU2F1	1:91662966-91748448	con	SY_0.15	1.77069	0.79366	-1.15771	0.004	0.0326096	yes
STK17A	2:51671798-51696372	con	SY_0.15	32.6557	14.635	-1.15791	5e-05	0.000905823	yes
SMAD9	1:172377066-172398079	con	SY_0.15	41.0588	18.3906	-1.15873	5e-05	0.000905823	yes
ENSGALG00000006868	5:15714416-15737602	con	SY_0.15	119.008	53.2936	-1.15902	5e-05	0.000905823	yes
GUCD1	15:8479512-8485340	con	SY_0.15	35.0936	15.7027	-1.1602	5e-05	0.000905823	yes
CCDC80	1:83535297-83558902	con	SY_0.15	80.8306	36.1382	-1.16137	5e-05	0.000905823	yes
LRRC31	9:20002981-20011556	con	SY_0.15	17.4171	7.78698	-1.16137	5e-05	0.000905823	yes
UBAP1	Z:7564116-7574415	con	SY_0.15	6.16932	2.75287	-1.16417	0.0008	0.0093573	yes
BMPR1A	6:2497709-2573153	con	SY_0.15	12.7846	5.7046	-1.16421	5e-05	0.000905823	yes
RAPGEF2	4:22207133-22378393	con	SY_0.15	12.0047	5.34426	-1.16754	5e-05	0.000905823	yes
SMOC1	5:27718428-27835276	con	SY_0.15	3.12342	1.39046	-1.16756	0.00425	0.0340327	yes
ENSGALG00000016732	3:111265110-111274122	con	SY_0.15	23.5261	10.4501	-1.17074	5e-05	0.000905823	yes
ENSGALG00000034465	AADN04016254.1:39-3226	con	SY_0.15	4.84006	2.14897	-1.17138	0.0034	0.0288659	yes
ASAP2	3:96512107-96596917	con	SY_0.15	27.8481	12.349	-1.17319	5e-05	0.000905823	yes
OVOL2	3:15460177-15465535	con	SY_0.15	26.252	11.6312	-1.17442	0.0002	0.00296127	yes
DOK7	4:82476480-82501693	con	SY_0.15	5.82086	2.57494	-1.17669	0.0004	0.00536492	yes
KCNN2	Z:73269455-73338347	con	SY_0.15	85.6914	37.8842	-1.17755	5e-05	0.000905823	yes
PPM1F	15:474489-479338	con	SY_0.15	4.21668	1.86318	-1.17834	0.00365	0.0303972	yes
C5orf30	Z:49956073-49965412	con	SY_0.15	122.279	53.9397	-1.18076	5e-05	0.000905823	yes
FGFR3	4:83993010-84044572	con	SY_0.15	76.9029	33.9226	-1.18079	5e-05	0.000905823	yes
NUAK1	1:53983408-54028357	con	SY_0.15	9.23978	4.06818	-1.18348	5e-05	0.000905823	yes
TRPC4	1:171798603-171935943	con	SY_0.15	4.75896	2.09466	-1.18393	5e-05	0.000905823	yes
SLC30A1	3:22218949-22224149	con	SY_0.15	34.0663	14.9798	-1.18532	5e-05	0.000905823	yes
C1orf198	3:40659666-40679553	con	SY_0.15	23.3802	10.2803	-1.18541	5e-05	0.000905823	yes
CAV2	1:25079043-25090122	con	SY_0.15	61.1091	26.826	-1.18776	5e-05	0.000905823	yes
CLIP4	3:8504536-8527052	con	SY_0.15	74.3419	32.6339	-1.1878	5e-05	0.000905823	yes
SUCO	8:4492612-4529747	con	SY_0.15	75.9738	33.2532	-1.19201	5e-05	0.000905823	yes
UNC93A	3:42528288-42549146	con	SY_0.15	3.78501	1.6544	-1.19399	0.0011	0.0119761	yes
ENSGALG00000015140	2:106277510-106298765	con	SY_0.15	4.70811	2.0564	-1.19502	0.00035	0.00477957	yes
ACSL5	6:26724691-26741477	con	SY_0.15	27.7265	12.1036	-1.19583	5e-05	0.000905823	yes
ENSGALG00000045168	1:59380188-59387463	con	SY_0.15	42.0609	18.3556	-1.19625	5e-05	0.000905823	yes
TMEM106B	2:26625915-26756149	con	SY_0.15	96.5726	42.0273	-1.20029	5e-05	0.000905823	yes
ENSGALG00000041296	3:107272766-107275351	con	SY_0.15	291.974	126.771	-1.20362	5e-05	0.000905823	yes
ENSGALG00000007570	4:11492246-11500746	con	SY_0.15	173.668	75.3559	-1.20454	5e-05	0.000905823	yes
LRP6	1:71750242-71874216	con	SY_0.15	10.466	4.532	-1.2075	5e-05	0.000905823	yes
ENSGALG00000031456	5:24977291-24994712	con	SY_0.15	3.99076	1.72682	-1.20854	5e-05	0.000905823	yes
CHST12	14:3145181-3146474	con	SY_0.15	610.947	264.28	-1.20898	5e-05	0.000905823	yes
FAM83F	1:50300710-50313130	con	SY_0.15	19.1673	8.28829	-1.2095	5e-05	0.000905823	yes
SLC26A5	1:13005188-13038545	con	SY_0.15	25.2654	10.9148	-1.21088	5e-05	0.000905823	yes
BICC1	6:762211-857639	con	SY_0.15	13.179	5.68634	-1.21267	5e-05	0.000905823	yes
TTPA	2:114206087-114218909	con	SY_0.15	14.8248	6.38898	-1.21436	0.00285	0.0252746	yes
PDE5	4:55000128-55059970	con	SY_0.15	31.4592	13.5575	-1.21439	5e-05	0.000905823	yes
ENSGALG00000007408	2:15445583-15567893	con	SY_0.15	16.7946	7.22396	-1.21714	5e-05	0.000905823	yes
DSE	3:64034687-64054970	con	SY_0.15	29.492	12.6798	-1.21779	5e-05	0.000905823	yes
DIS3L	10:18467489-18482742	con	SY_0.15	29.8636	12.8347	-1.21833	5e-05	0.000905823	yes
EPB41L4A	Z:46187203-46301052	con	SY_0.15	39.4663	16.9617	-1.21834	5e-05	0.000905823	yes
Dab1	8:25927811-26016403	con	SY_0.15	14.2352	6.10214	-1.22208	5e-05	0.000905823	yes
MSMO1	4:24031389-24037718	con	SY_0.15	125.289	53.6824	-1.22274	5e-05	0.000905823	yes
ENSGALG00000033925	4:83722054-83733392	con	SY_0.15	194.696	83.4156	-1.22283	5e-05	0.000905823	yes
IL13RA1	4:3411946-3422822	con	SY_0.15	3.69683	1.58238	-1.22419	0.002	0.0191144	yes
SMTNL2	19:9933641-9955929	con	SY_0.15	4.66052	1.99069	-1.22722	0.0018	0.0177288	yes
ENSGALG00000036535	AADN04024150.1:0-7941	con	SY_0.15	3.51711	1.50136	-1.22812	0.0028	0.024995	yes
ENSGALG00000007080	13:17126955-17144545	con	SY_0.15	26.3963	11.2676	-1.22816	5e-05	0.000905823	yes
OSBPL6	7:15499240-15581031	con	SY_0.15	0.806441	0.343944	-1.2294	0.0056	0.0421964	yes
SOX5	1:65938355-66226982	con	SY_0.15	19.0093	8.10576	-1.22969	5e-05	0.000905823	yes
GAREM1	2:106691609-106844648	con	SY_0.15	11.183	4.76213	-1.23162	0.00035	0.00477957	yes
LAMA2	3:58293668-58629545	con	SY_0.15	10.574	4.4976	-1.2333	5e-05	0.000905823	yes
GUCY1A3	4:20922070-20955918	con	SY_0.15	52.4097	22.2796	-1.23411	5e-05	0.000905823	yes
FGFR2	6:30907653-30979928	con	SY_0.15	117.501	49.9002	-1.23555	5e-05	0.000905823	yes
FP	8:18795461-18813236	con	SY_0.15	25.7798	10.9285	-1.23815	5e-05	0.000905823	yes
ENSGALG00000016196	1:109708830-109726598	con	SY_0.15	18.0091	7.63025	-1.23892	5e-05	0.000905823	yes
MSX2	13:9797291-9802103	con	SY_0.15	543.714	230.104	-1.24056	5e-05	0.000905823	yes
PLEKHG1	3:48760266-48790770	con	SY_0.15	4.03749	1.70655	-1.24238	5e-05	0.000905823	yes
MAT1A	6:4436645-4453363	con	SY_0.15	4.04084	1.69814	-1.2507	0.00055	0.00690459	yes
GPR75	3:3016355-3017966	con	SY_0.15	18.7255	7.8429	-1.25555	5e-05	0.000905823	yes
MYO1B	7:8014555-8105794	con	SY_0.15	92.3747	38.6435	-1.25727	5e-05	0.000905823	yes
MECOM	9:20063009-20363223	con	SY_0.15	143.209	59.8824	-1.25791	5e-05	0.000905823	yes
KIF26B	3:34440792-34727673	con	SY_0.15	3.33627	1.39431	-1.25868	5e-05	0.000905823	yes
LMBRD2	Z:10937323-10990078	con	SY_0.15	18.6892	7.80504	-1.25973	0.00015	0.00237699	yes
NEO1	10:1742726-1938673	con	SY_0.15	21.2169	8.84493	-1.26229	5e-05	0.000905823	yes
HMCN1	8:10119574-10310613	con	SY_0.15	12.8607	5.3612	-1.26234	5e-05	0.000905823	yes
GNA14	Z:37709881-37769362	con	SY_0.15	12.4911	5.20517	-1.26288	0.00015	0.00237699	yes
ENSGALG00000007710	4:12285789-12294879	con	SY_0.15	76.5297	31.8304	-1.26562	5e-05	0.000905823	yes
ZMIZ1	6:12266617-12412519	con	SY_0.15	30.9377	12.8328	-1.26953	5e-05	0.000905823	yes
GRIK4	24:3593269-3711248	con	SY_0.15	3.39509	1.40809	-1.26971	0.00075	0.00889549	yes
ZFHX4	2:119748595-119874210	con	SY_0.15	1.43007	0.592578	-1.27101	5e-05	0.000905823	yes
ENSGALG00000038140	4:25162883-25180520	con	SY_0.15	7.7048	3.18601	-1.27401	0.0002	0.00296127	yes
STK38L	1:68136802-68179594	con	SY_0.15	22.0988	9.10585	-1.2791	5e-05	0.000905823	yes
ZBTB44	24:1595969-1635701	con	SY_0.15	9.1991	3.78959	-1.27945	5e-05	0.000905823	yes
FRS2	1:35449508-35495133	con	SY_0.15	5.6494	2.32676	-1.27977	5e-05	0.000905823	yes
TRIM2	4:19996053-20033183	con	SY_0.15	8.4006	3.45953	-1.27991	5e-05	0.000905823	yes
SLC35F3	3:38615907-38665544	con	SY_0.15	64.4452	26.5386	-1.27998	5e-05	0.000905823	yes
ENSGALG00000019077	1:177369324-177371367	con	SY_0.15	8.48924	3.49289	-1.28121	5e-05	0.000905823	yes
PIGR	26:2579725-2590284	con	SY_0.15	103.375	42.5221	-1.2816	5e-05	0.000905823	yes
ENSGALG00000039269	18:9594759-9619312	con	SY_0.15	3.95983	1.62841	-1.28197	5e-05	0.000905823	yes
MRC2	27:2576055-2597588	con	SY_0.15	40.751	16.7261	-1.28474	5e-05	0.000905823	yes
SRGAP1	1:33440187-33580652	con	SY_0.15	11.4753	4.70788	-1.28539	5e-05	0.000905823	yes
SLC6A4	19:6202078-6214207	con	SY_0.15	6.58074	2.69237	-1.28937	5e-05	0.000905823	yes
SH3BGRL2	3:79624481-79659456	con	SY_0.15	452.455	184.992	-1.29031	5e-05	0.000905823	yes
MCTP1	Z:57623924-57794587	con	SY_0.15	5.86829	2.3979	-1.29117	5e-05	0.000905823	yes
KCTD7	19:5008444-5015244	con	SY_0.15	3.88799	1.5858	-1.29381	0.0017	0.0169287	yes
HEY2	3:60044510-60053824	con	SY_0.15	37.951	15.471	-1.29457	5e-05	0.000905823	yes
ENSGALG00000046458	AADN04006573.1:4432-11954	con	SY_0.15	19.8957	8.09368	-1.29759	5e-05	0.000905823	yes
ARHGEF4	9:2275485-2312749	con	SY_0.15	21.9962	8.93142	-1.30029	5e-05	0.000905823	yes
ENSGALG00000030789	7:10044963-10074000	con	SY_0.15	8.07292	3.2777	-1.30041	5e-05	0.000905823	yes
C7	Z:12937308-12956457	con	SY_0.15	5.01549	2.03467	-1.30159	5e-05	0.000905823	yes
FDFT1	3:107816739-107827820	con	SY_0.15	106.464	43.1415	-1.30322	5e-05	0.000905823	yes
ZBTB37	8:7425583-7430354	con	SY_0.15	5.45914	2.20286	-1.3093	0.00155	0.0158191	yes
SMPD3	11:191661-296948	con	SY_0.15	3.91988	1.58052	-1.31041	0.0001	0.00169162	yes
TRAF1	17:8783104-8792615	con	SY_0.15	7.97796	3.21404	-1.31163	5e-05	0.000905823	yes
ENSGALG00000031586	5:34471730-34492617	con	SY_0.15	5.14229	2.06835	-1.31393	0.0013	0.0136485	yes
DENND4C	Z:33679445-33728466	con	SY_0.15	30.0668	12.0744	-1.31622	5e-05	0.000905823	yes
FSD1L	Z:55008369-55037122	con	SY_0.15	5.24329	2.09995	-1.32012	5e-05	0.000905823	yes
SALL4	20:13306171-13320343	con	SY_0.15	28.3389	11.3362	-1.32184	5e-05	0.000905823	yes
CACNA1C	1:61471635-61671542	con	SY_0.15	1.20821	0.483128	-1.32239	0.00015	0.00237699	yes
PLA2G4F	5:25553602-25573229	con	SY_0.15	3.73753	1.49386	-1.32305	0.00295	0.02589	yes
AP1S2	1:121850196-121884181	con	SY_0.15	100.584	40.1684	-1.32427	5e-05	0.000905823	yes
LPP	9:14391787-14675571	con	SY_0.15	5.15213	2.04892	-1.3303	5e-05	0.000905823	yes
SGMS2	4:38259657-38285988	con	SY_0.15	97.8064	38.8086	-1.33355	5e-05	0.000905823	yes
hairy1	21:2797269-2799502	con	SY_0.15	82.2837	32.569	-1.33711	5e-05	0.000905823	yes
RAB32	3:47006776-47025939	con	SY_0.15	32.2405	12.7172	-1.3421	5e-05	0.000905823	yes
DCAF12	Z:7511920-7540939	con	SY_0.15	78.8604	31.1006	-1.34236	5e-05	0.000905823	yes
OTUD7A	10:5449520-5483094	con	SY_0.15	3.73119	1.47099	-1.34285	0.0001	0.00169162	yes
BMF	5:29410987-29430989	con	SY_0.15	12.2165	4.81036	-1.34461	5e-05	0.000905823	yes
LHFPL2	Z:22593955-22715343	con	SY_0.15	7.14129	2.80669	-1.34731	0.0002	0.00296127	yes
NOS1	15:11357296-11386044	con	SY_0.15	37.555	14.7507	-1.34822	5e-05	0.000905823	yes
ENSGALG00000033226	1:7293528-7352456	con	SY_0.15	15.2061	5.96308	-1.35052	5e-05	0.000905823	yes
SLC12A2	Z:56691801-56743665	con	SY_0.15	108.566	42.5291	-1.35205	5e-05	0.000905823	yes
GJB1	4:2330649-2333141	con	SY_0.15	35.9426	14.0285	-1.35734	5e-05	0.000905823	yes
ENSGALG00000041965	1:644121-644826	con	SY_0.15	264.414	103.121	-1.35847	5e-05	0.000905823	yes
PALMD	8:12119138-12143256	con	SY_0.15	39.576	15.4169	-1.36011	5e-05	0.000905823	yes
ENSGALG00000010639	5:43206890-43293003	con	SY_0.15	1.84461	0.717596	-1.36207	0.0001	0.00169162	yes
SHMT1	14:5132125-5136038	con	SY_0.15	8.27115	3.21423	-1.36361	5e-05	0.000905823	yes
SLC13A2	19:5661976-5671354	con	SY_0.15	7.76642	3.01638	-1.36443	0.00015	0.00237699	yes
HTR1B	3:80361172-80362338	con	SY_0.15	153.909	59.6805	-1.36674	5e-05	0.000905823	yes
FECH	Z:380961-391867	con	SY_0.15	12.5567	4.85319	-1.37145	5e-05	0.000905823	yes
DMXL1	Z:71667850-71706761	con	SY_0.15	8.95267	3.44974	-1.37583	5e-05	0.000905823	yes
FKBP5	26:67523-84823	con	SY_0.15	104.644	40.2634	-1.37795	5e-05	0.000905823	yes
NDC80	2:101458365-101477125	con	SY_0.15	2.67703	1.02819	-1.38053	0.00055	0.00690459	yes
PIK3CD	21:3417402-3489188	con	SY_0.15	3.69391	1.41775	-1.38155	5e-05	0.000905823	yes
ENSGALG00000041977	4:17396690-17432723	con	SY_0.15	277.911	106.397	-1.38517	5e-05	0.000905823	yes
PTPN3	2:84891046-85044337	con	SY_0.15	8.53481	3.26534	-1.38613	5e-05	0.000905823	yes
GPM6B	1:122827172-122931852	con	SY_0.15	22.076	8.43709	-1.38766	5e-05	0.000905823	yes
LZTS3	4:89251923-89258225	con	SY_0.15	20.0718	7.66765	-1.38832	5e-05	0.000905823	yes
ENSGALG00000014978	Z:23461598-23577675	con	SY_0.15	141.003	53.8471	-1.38878	5e-05	0.000905823	yes
GRM8	1:20929340-21246163	con	SY_0.15	3.15353	1.20429	-1.38879	0.00095	0.010678	yes
ENSGALG00000014786	Z:21646750-21656155	con	SY_0.15	3.24668	1.23966	-1.38902	0.0017	0.0169287	yes
CAPN2	3:17691063-17711286	con	SY_0.15	30.9784	11.8102	-1.39122	5e-05	0.000905823	yes
DCP2	Z:45955425-45980081	con	SY_0.15	7.74643	2.95288	-1.39141	5e-05	0.000905823	yes
SNX16	2:122059413-122083050	con	SY_0.15	30.2607	11.5085	-1.39475	5e-05	0.000905823	yes
ENSGALG00000039438	AADN04000879.1:34867-43489	con	SY_0.15	1.18714	0.451314	-1.39528	0.0062	0.0455756	yes
ENSGALG00000041372	2:44156260-44201027	con	SY_0.15	36.8892	13.942	-1.40376	5e-05	0.000905823	yes
ARFGEF3	3:54570806-54650676	con	SY_0.15	14.3518	5.42198	-1.40434	5e-05	0.000905823	yes
ARHGEF26	9:23309858-23353078	con	SY_0.15	33.1144	12.5091	-1.40448	5e-05	0.000905823	yes
CDC7	8:14544897-14558894	con	SY_0.15	4.56785	1.72209	-1.40736	5e-05	0.000905823	yes
TPCN2	5:17116981-17174722	con	SY_0.15	6.71491	2.52822	-1.40924	5e-05	0.000905823	yes
TESC	15:11411292-11414048	con	SY_0.15	35.0539	13.1817	-1.41104	5e-05	0.000905823	yes
ENSGALG00000041739	AADN04024149.1:777-5231	con	SY_0.15	4.2677	1.60381	-1.41195	0.00305	0.0265268	yes
ENSGALG00000034304	AADN04001998.1:3079-3750	con	SY_0.15	68.1384	25.5955	-1.41258	0.0001	0.00169162	yes
ENSGALG00000027056	1:59476228-59483268	con	SY_0.15	28.9714	10.8718	-1.41403	5e-05	0.000905823	yes
SNAP91	3:77916879-77987344	con	SY_0.15	36.3032	13.588	-1.41777	5e-05	0.000905823	yes
BCAT1	1:65432215-65472333	con	SY_0.15	55.5365	20.7466	-1.42056	5e-05	0.000905823	yes
STK32A	13:18066210-18085473	con	SY_0.15	4.87019	1.81643	-1.42287	0.0001	0.00169162	yes
DDAH1	8:16296874-16342908	con	SY_0.15	6.83026	2.54431	-1.42467	0.00035	0.00477957	yes
COL14A1	2:136894049-137014125	con	SY_0.15	9.20761	3.42448	-1.42694	5e-05	0.000905823	yes
PPM1E	19:7162888-7171399	con	SY_0.15	38.3978	14.2582	-1.42923	5e-05	0.000905823	yes
LIFR	Z:12007503-12048425	con	SY_0.15	6.25542	2.31991	-1.43104	5e-05	0.000905823	yes
ENSGALG00000033606	AADN04001852.1:18455-21661	con	SY_0.15	9.62252	3.56384	-1.43298	5e-05	0.000905823	yes
CRMP1A	4:79798865-79843362	con	SY_0.15	73.8972	27.3538	-1.43378	5e-05	0.000905823	yes
SMAD3	10:18812336-18872532	con	SY_0.15	24.0621	8.86225	-1.44102	5e-05	0.000905823	yes
TOX2	20:2376244-2489922	con	SY_0.15	7.33506	2.69855	-1.44262	5e-05	0.000905823	yes
MAST4	Z:21007929-21296657	con	SY_0.15	18.1351	6.65036	-1.44728	5e-05	0.000905823	yes
HLCS	1:106864785-106977050	con	SY_0.15	14.0264	5.12224	-1.4533	5e-05	0.000905823	yes
MYRF	5:183510-218679	con	SY_0.15	28.1378	10.269	-1.45421	5e-05	0.000905823	yes
CDO1	Z:72942622-72952484	con	SY_0.15	15.4755	5.63416	-1.45771	5e-05	0.000905823	yes
COBLL1	7:20140770-20213740	con	SY_0.15	87.5015	31.8543	-1.45782	5e-05	0.000905823	yes
FAM171B	7:1282402-1313156	con	SY_0.15	4.14941	1.50633	-1.46187	5e-05	0.000905823	yes
OSGIN1	11:2658955-2694119	con	SY_0.15	104.605	37.9724	-1.46193	5e-05	0.000905823	yes
RHOF	15:5657770-5666735	con	SY_0.15	25.6028	9.25483	-1.46802	5e-05	0.000905823	yes
ENSGALG00000026383	1:123358483-123360112	con	SY_0.15	1964.89	709.574	-1.46942	5e-05	0.000905823	yes
NELFA	4:83757395-83780690	con	SY_0.15	175.211	62.8259	-1.47966	5e-05	0.000905823	yes
SYT9	5:7176611-7235949	con	SY_0.15	2.13697	0.765253	-1.48156	0.00095	0.010678	yes
ENSGALG00000013575	2:90026992-90030445	con	SY_0.15	140.934	50.2779	-1.48703	5e-05	0.000905823	yes
IRX3	11:4648343-4649811	con	SY_0.15	6.56714	2.33897	-1.48939	0.00115	0.0123909	yes
GATA3	1:4402131-4591692	con	SY_0.15	37.01	13.158	-1.49198	5e-05	0.000905823	yes
ZFAND5	Z:35736062-35750582	con	SY_0.15	54.4305	19.3225	-1.49413	5e-05	0.000905823	yes
NPTX1	18:9564599-9566930	con	SY_0.15	5.61407	1.99259	-1.4944	0.0002	0.00296127	yes
CSGALNACT2	6:4770392-4784692	con	SY_0.15	50.3996	17.7855	-1.50271	5e-05	0.000905823	yes
NRIP1	1:98322193-98325661	con	SY_0.15	29.3908	10.3707	-1.50285	5e-05	0.000905823	yes
AMN1	1:59452518-59473212	con	SY_0.15	16.5441	5.83201	-1.50425	5e-05	0.000905823	yes
ENSGALG00000030855	2:44262333-44346921	con	SY_0.15	188.489	66.3632	-1.50603	0.0002	0.00296127	yes
LPCAT1	2:86095768-86157882	con	SY_0.15	8.03985	2.82738	-1.5077	5e-05	0.000905823	yes
PLPP4	6:30550104-30594979	con	SY_0.15	9.21996	3.23619	-1.51046	0.00065	0.00797502	yes
PSAT1	Z:37963279-37978569	con	SY_0.15	19.375	6.7932	-1.51203	5e-05	0.000905823	yes
ENSGALG00000033681	AADN04006716.1:4954-6328	con	SY_0.15	4.77376	1.67278	-1.51288	0.00345	0.0291078	yes
PTAR1	Z:34801344-34828236	con	SY_0.15	6.00606	2.1043	-1.51308	0.0001	0.00169162	yes
Sial-T2	1:66641207-66757539	con	SY_0.15	50.5733	17.6898	-1.51546	5e-05	0.000905823	yes
AMER2	1:177160926-177162801	con	SY_0.15	34.6582	12.0949	-1.51879	5e-05	0.000905823	yes
CRHBP	Z:23367197-23375648	con	SY_0.15	61.6504	21.4507	-1.52308	5e-05	0.000905823	yes
SLC18A2	6:29166113-29183730	con	SY_0.15	1.86788	0.649502	-1.52399	0.00535	0.0407208	yes
GATA2	12:9198667-9214691	con	SY_0.15	247.322	85.1215	-1.53879	5e-05	0.000905823	yes
PCGF5	6:19720930-19745244	con	SY_0.15	15.5118	5.32734	-1.54188	5e-05	0.000905823	yes
ENSGALG00000046617	1:91266900-91280783	con	SY_0.15	16.1717	5.55111	-1.54263	0.00055	0.00690459	yes
FAM219A	Z:7676382-7770624	con	SY_0.15	39.7839	13.6428	-1.54404	5e-05	0.000905823	yes
KRT19	27:4972721-4977524	con	SY_0.15	855.973	291.758	-1.55279	5e-05	0.000905823	yes
NSDHL	4:11324986-11335529	con	SY_0.15	21.0202	7.13204	-1.55939	5e-05	0.000905823	yes
SOSTDC1	2:28464104-28467890	con	SY_0.15	32.9027	11.1467	-1.56159	5e-05	0.000905823	yes
PAC1	2:1391173-1489728	con	SY_0.15	1.94769	0.659652	-1.56198	0.00195	0.0188361	yes
GPAM	6:26635202-26660787	con	SY_0.15	23.9053	8.0953	-1.56217	5e-05	0.000905823	yes
ENSGALG00000034611	AADN04007075.1:3130-9966	con	SY_0.15	1.15078	0.389046	-1.5646	0.00285	0.0252746	yes
CMTM4	11:11546670-11573359	con	SY_0.15	32.5819	10.99	-1.56788	5e-05	0.000905823	yes
ARHGEF28	Z:24570222-24702341	con	SY_0.15	60.5118	20.3887	-1.56944	5e-05	0.000905823	yes
SSTR2	18:9063415-9065697	con	SY_0.15	2.03437	0.683797	-1.57294	0.0004	0.00536492	yes
SFMBT2	1:3929631-4025430	con	SY_0.15	2.13788	0.717207	-1.57572	0.0002	0.00296127	yes
ENSGALG00000006724	9:3082799-3338435	con	SY_0.15	9.47599	3.16755	-1.58091	5e-05	0.000905823	yes
KCNK5	3:29274505-29304143	con	SY_0.15	19.8613	6.61263	-1.58666	5e-05	0.000905823	yes
NCAPG	4:76452107-76480363	con	SY_0.15	4.90594	1.63292	-1.58708	5e-05	0.000905823	yes
NEFL	22:952290-957139	con	SY_0.15	9.14795	3.04224	-1.58831	5e-05	0.000905823	yes
COL12A1	3:81088529-81188721	con	SY_0.15	3.25479	1.07947	-1.59224	5e-05	0.000905823	yes
PODN	8:24634399-24653942	con	SY_0.15	10.2233	3.3779	-1.59767	5e-05	0.000905823	yes
ENSGALG00000029776	AADN04020304.1:308-1901	con	SY_0.15	90.0805	29.6949	-1.601	5e-05	0.000905823	yes
SLC2A12	3:56395892-56424175	con	SY_0.15	86.2354	28.2232	-1.6114	5e-05	0.000905823	yes
DLG1	9:12488711-12640489	con	SY_0.15	68.9556	22.5307	-1.61378	5e-05	0.000905823	yes
CYP7B1	2:114794325-114922700	con	SY_0.15	3.41322	1.11511	-1.61395	0.00015	0.00237699	yes
ENSGALG00000013427	4:61488305-61532397	con	SY_0.15	37.7361	12.3104	-1.61607	5e-05	0.000905823	yes
PTPN14	3:21125848-21184909	con	SY_0.15	3.18618	1.03932	-1.61619	5e-05	0.000905823	yes
NSD2	4:83802146-83861078	con	SY_0.15	10.7209	3.49548	-1.61687	5e-05	0.000905823	yes
ENSGALG00000036437	4:54168181-54195086	con	SY_0.15	3.64392	1.18228	-1.62392	5e-05	0.000905823	yes
GRAMD1B	24:2901397-3006641	con	SY_0.15	8.73767	2.83431	-1.62425	5e-05	0.000905823	yes
TLR3	4:61707201-61720669	con	SY_0.15	33.2403	10.734	-1.63075	5e-05	0.000905823	yes
TLE1	Z:39184186-39254335	con	SY_0.15	7.80438	2.51454	-1.63399	5e-05	0.000905823	yes
ENSGALG00000014324	1:75871015-75879214	con	SY_0.15	226.27	72.8828	-1.63439	5e-05	0.000905823	yes
DOK6	2:94050943-94295278	con	SY_0.15	7.01846	2.2531	-1.63925	0.0002	0.00296127	yes
CACNB2	2:19149201-19371796	con	SY_0.15	4.60873	1.47647	-1.64221	5e-05	0.000905823	yes
ENSGALG00000018503	22:2639463-2641010	con	SY_0.15	4.57107	1.45675	-1.64977	0.0052	0.039848	yes
MTCL1	2:98980102-99067476	con	SY_0.15	4.33115	1.37743	-1.65277	5e-05	0.000905823	yes
ADCY8	2:140988803-141106986	con	SY_0.15	2.52485	0.800942	-1.65643	5e-05	0.000905823	yes
ENSGALG00000006728	15:8813667-8842734	con	SY_0.15	3.53338	1.12002	-1.65753	5e-05	0.000905823	yes
FRMD4A	1:6872403-6904583	con	SY_0.15	13.871	4.39628	-1.65772	5e-05	0.000905823	yes
FIGN	7:20674535-20676779	con	SY_0.15	1.85965	0.588713	-1.6594	0.0003	0.00419411	yes
ENSGALG00000011962	4:54545703-54562470	con	SY_0.15	21.563	6.82547	-1.65956	5e-05	0.000905823	yes
ADAMTS8	24:1657702-1668923	con	SY_0.15	13.6329	4.30501	-1.66301	5e-05	0.000905823	yes
ENSGALG00000030712	AADN04000776.1:10-7373	con	SY_0.15	40.6902	12.8281	-1.66537	5e-05	0.000905823	yes
ADORA2A	15:8526760-8536246	con	SY_0.15	101.567	31.8088	-1.67493	5e-05	0.000905823	yes
CAPN6	4:13384417-13431218	con	SY_0.15	2.25194	0.702747	-1.68009	0.0002	0.00296127	yes
ENSGALG00000012847	1:56693092-56705912	con	SY_0.15	7.45859	2.31946	-1.68511	5e-05	0.000905823	yes
CNTN3	12:16927114-16996501	con	SY_0.15	1.18982	0.369712	-1.68626	0.0009	0.0102869	yes
GRHL2	2:129435467-129485773	con	SY_0.15	30.2549	9.39846	-1.68667	5e-05	0.000905823	yes
SLC34A2	4:73916378-73933539	con	SY_0.15	371.207	115.137	-1.68887	0.0001	0.00169162	yes
TSHZ1	2:91647485-91699829	con	SY_0.15	10.7228	3.32295	-1.69015	5e-05	0.000905823	yes
ENSGALG00000011086	3:40139163-40141584	con	SY_0.15	306.502	94.7569	-1.69359	5e-05	0.000905823	yes
ABCA4	8:13683888-13758163	con	SY_0.15	4.62525	1.429	-1.69453	5e-05	0.000905823	yes
ENSGALG00000039528	6:20124538-20190565	con	SY_0.15	2.07741	0.640775	-1.6969	5e-05	0.000905823	yes
ATP7B	1:170322065-170351964	con	SY_0.15	1.12459	0.346375	-1.699	0.00055	0.00690459	yes
ENSGALG00000001483	21:2097420-2103217	con	SY_0.15	132.542	40.3938	-1.71424	5e-05	0.000905823	yes
VANGL2	25:1256422-1261166	con	SY_0.15	34.949	10.6487	-1.71457	5e-05	0.000905823	yes
MLLT3	Z:34030582-34141800	con	SY_0.15	35.4683	10.799	-1.71564	5e-05	0.000905823	yes
ENSGALG00000030769	4:61536298-61629758	con	SY_0.15	20.2236	6.15667	-1.71582	5e-05	0.000905823	yes
SLBP	4:84514572-84521325	con	SY_0.15	4.50733	1.3667	-1.72157	5e-05	0.000905823	yes
ENSGALG00000034695	17:2371746-2378780	con	SY_0.15	10.7104	3.22981	-1.72949	5e-05	0.000905823	yes
Lrrn1	12:18314288-18331017	con	SY_0.15	7.26003	2.17739	-1.73738	5e-05	0.000905823	yes
THSD4	10:6291472-6524226	con	SY_0.15	15.5517	4.66029	-1.73858	5e-05	0.000905823	yes
ATP8A1	4:68573328-68662442	con	SY_0.15	42.1374	12.6011	-1.74156	5e-05	0.000905823	yes
ENSGALG00000045221	5:45252099-45254363	con	SY_0.15	25.2149	7.48711	-1.7518	0.00065	0.00797502	yes
NRG2	13:1242063-1393985	con	SY_0.15	0.793728	0.235218	-1.75465	0.003	0.0261929	yes
ENSGALG00000004946	9:9318985-9370173	con	SY_0.15	0.884686	0.26189	-1.7562	0.00075	0.00889549	yes
ADRA2A	6:26252414-26253698	con	SY_0.15	33.3745	9.85862	-1.75929	5e-05	0.000905823	yes
EPHA7	3:74171527-74327787	con	SY_0.15	0.873578	0.257901	-1.76012	0.0013	0.0136485	yes
PAN3	1:175945882-176020918	con	SY_0.15	43.3049	12.7825	-1.76036	5e-05	0.000905823	yes
SYT12	5:1444686-1451053	con	SY_0.15	4.22088	1.2363	-1.77151	0.00015	0.00237699	yes
VIPR2	2:9667073-9717822	con	SY_0.15	1.10278	0.319735	-1.7862	0.00455	0.0357787	yes
ENSGALG00000044155	1:47946786-47951465	con	SY_0.15	56.0609	16.2203	-1.7892	5e-05	0.000905823	yes
SLC6A14	4:3062273-3075508	con	SY_0.15	152.838	44.0112	-1.79606	5e-05	0.000905823	yes
NR5A2	8:1592875-1687096	con	SY_0.15	3.17342	0.910295	-1.80163	5e-05	0.000905823	yes
COTL1	11:17047245-17065341	con	SY_0.15	666.128	190.676	-1.80467	5e-05	0.000905823	yes
LDLRAD3	5:19303711-19373731	con	SY_0.15	6.85299	1.94968	-1.81349	0.0004	0.00536492	yes
YPEL1	15:555263-562933	con	SY_0.15	84.4868	23.9539	-1.81846	5e-05	0.000905823	yes
ENSGALG00000042157	Z:37483155-37496430	con	SY_0.15	5.66962	1.60522	-1.82048	0.00065	0.00797502	yes
SPSB4	9:6576885-6663551	con	SY_0.15	11.1572	3.13809	-1.83002	5e-05	0.000905823	yes
RERG	1:62659917-62765595	con	SY_0.15	3.91079	1.09958	-1.83051	0.00215	0.0202477	yes
ENSGALG00000045592	1:173374918-173479349	con	SY_0.15	1.24354	0.349021	-1.83307	0.00705	0.0498733	yes
NLGN3	4:2335564-2353557	con	SY_0.15	10.4424	2.9047	-1.84599	5e-05	0.000905823	yes
ENSGALG00000008681	17:2234851-2252988	con	SY_0.15	49.4404	13.6155	-1.86044	5e-05	0.000905823	yes
ENSGALG00000006944	12:11681381-11694792	con	SY_0.15	9.24217	2.5362	-1.86556	0.0039	0.0319484	yes
COL19A1	3:83179141-83351003	con	SY_0.15	0.72857	0.199917	-1.86566	0.00125	0.0132365	yes
CSRP2	1:38237619-38245641	con	SY_0.15	382.671	104.819	-1.8682	5e-05	0.000905823	yes
BRK-3	7:11874179-11969327	con	SY_0.15	96.4255	26.4033	-1.8687	5e-05	0.000905823	yes
FGB	4:20472455-20478595	con	SY_0.15	299.831	81.8228	-1.87357	5e-05	0.000905823	yes
MAP2K6	18:8052644-8088396	con	SY_0.15	3.15732	0.860433	-1.87556	5e-05	0.000905823	yes
CNTNAP5	7:24545118-24814619	con	SY_0.15	0.991932	0.267948	-1.88829	5e-05	0.000905823	yes
ENSGALG00000036108	21:2080808-2096566	con	SY_0.15	152.054	40.6881	-1.90191	5e-05	0.000905823	yes
ELAVL4	8:23628028-23700939	con	SY_0.15	3.60993	0.962356	-1.90733	5e-05	0.000905823	yes
MCF2	4:5064751-5112915	con	SY_0.15	40.126	10.6477	-1.91399	5e-05	0.000905823	yes
Edar	1:136466223-136492266	con	SY_0.15	3.18661	0.84549	-1.91416	0.00045	0.00590102	yes
ENSGALG00000042678	1:75841909-75843836	con	SY_0.15	2.70439	0.709626	-1.93017	0.005	0.0386436	yes
ENSGALG00000044238	1:161278341-161284057	con	SY_0.15	0.761033	0.199605	-1.93081	0.00335	0.0285129	yes
ATP6V0A4	1:56383283-56408305	con	SY_0.15	222.771	58.2259	-1.93583	5e-05	0.000905823	yes
TNFSF10	9:19373429-19382089	con	SY_0.15	311.311	80.7365	-1.94706	5e-05	0.000905823	yes
USP13	9:17437021-17477511	con	SY_0.15	24.3429	6.28615	-1.95325	5e-05	0.000905823	yes
MMD2	14:4047603-4058713	con	SY_0.15	1.26097	0.319306	-1.98152	0.0003	0.00419411	yes
COL15A1	2:55990570-56094186	con	SY_0.15	2.07348	0.524623	-1.9827	5e-05	0.000905823	yes
KIAA1644	1:69360786-69416331	con	SY_0.15	1.18498	0.297526	-1.99377	0.0056	0.0421964	yes
FAM26F	3:64018363-64020812	con	SY_0.15	19.2387	4.82848	-1.99437	5e-05	0.000905823	yes
LZTS1	22:1597119-1599410	con	SY_0.15	5.70969	1.4323	-1.99508	5e-05	0.000905823	yes
RNF144B	2:60441861-60473502	con	SY_0.15	7.12814	1.78371	-1.99864	5e-05	0.000905823	yes
BCAS1	20:12593354-12627734	con	SY_0.15	10.4243	2.59398	-2.00671	5e-05	0.000905823	yes
GMNN	2:90523232-90528650	con	SY_0.15	86.3227	21.4223	-2.01062	5e-05	0.000905823	yes
ENSGALG00000010653	3:34311458-34422873	con	SY_0.15	4.11896	1.0215	-2.01159	5e-05	0.000905823	yes
CRYBA2	7:22475555-22477894	con	SY_0.15	7.83314	1.92877	-2.02191	0.0001	0.00169162	yes
NOV	2:136568797-136574085	con	SY_0.15	9.7648	2.39125	-2.02983	5e-05	0.000905823	yes
SOX13	26:1683808-1703852	con	SY_0.15	94.8538	22.6133	-2.06854	5e-05	0.000905823	yes
ENSGALG00000019846	3:107863810-107866429	con	SY_0.15	3.78051	0.897924	-2.07392	0.0046	0.0361299	yes
NBEAL1	7:13734318-13819369	con	SY_0.15	32.0929	7.51047	-2.09528	5e-05	0.000905823	yes
ENSGALG00000001035	28:2204643-2216483	con	SY_0.15	11.2249	2.62356	-2.0971	5e-05	0.000905823	yes
ENSGALG00000043817	1:75880171-75881531	con	SY_0.15	63.3208	14.7845	-2.0986	5e-05	0.000905823	yes
MOGAT1	9:8038069-8049501	con	SY_0.15	4.77432	1.10965	-2.10519	0.00025	0.00359538	yes
TCERG1L	6:34626203-34707794	con	SY_0.15	110.774	25.6205	-2.11225	5e-05	0.000905823	yes
KL	1:174247035-174291621	con	SY_0.15	11.7592	2.71318	-2.11573	5e-05	0.000905823	yes
PACSIN1	26:4361059-4364487	con	SY_0.15	13.3881	3.07105	-2.12414	5e-05	0.000905823	yes
SLC4A7	2:38586293-38666471	con	SY_0.15	95.6811	21.9341	-2.12506	5e-05	0.000905823	yes
ENSGALG00000019847	3:107860149-107861091	con	SY_0.15	417.893	95.6499	-2.1273	5e-05	0.000905823	yes
ENSGALG00000029456	4:84503284-84508288	con	SY_0.15	57.9562	13.1523	-2.13965	5e-05	0.000905823	yes
ENSGALG00000033420	AADN04000745.1:20-5551	con	SY_0.15	17.7327	3.99084	-2.15165	5e-05	0.000905823	yes
ENSGALG00000009639	4:25181858-25200923	con	SY_0.15	5.01582	1.12854	-2.15203	5e-05	0.000905823	yes
SOX6	5:11115669-11366088	con	SY_0.15	2.34109	0.523958	-2.15965	5e-05	0.000905823	yes
ENSGALG00000034065	4:84509163-84512376	con	SY_0.15	76.8069	17.0904	-2.16805	5e-05	0.000905823	yes
SEBOX	19:5638402-5639026	con	SY_0.15	350.256	77.8716	-2.16924	5e-05	0.000905823	yes
ENSGALG00000026768	Z:50223339-50282675	con	SY_0.15	4.82012	1.06712	-2.17535	5e-05	0.000905823	yes
EMB	Z:14736700-14761276	con	SY_0.15	153.397	33.6124	-2.19021	5e-05	0.000905823	yes
ENSGALG00000012464	5:58868217-58927474	con	SY_0.15	33.9553	7.22694	-2.23218	5e-05	0.000905823	yes
CP49	2:42607306-42777858	con	SY_0.15	2.38236	0.506541	-2.23364	5e-05	0.000905823	yes
REEP1	4:86105020-86142977	con	SY_0.15	11.0763	2.35257	-2.23517	5e-05	0.000905823	yes
NRXN3	5:39613133-39992277	con	SY_0.15	1.26981	0.269537	-2.23605	0.0001	0.00169162	yes
PDE8B	Z:23210325-23284124	con	SY_0.15	1.84169	0.384808	-2.25882	0.00035	0.00477957	yes
ENSGALG00000020554	Z:33379223-33557131	con	SY_0.15	26.1682	5.45621	-2.26184	5e-05	0.000905823	yes
FRMPD4	1:123533141-123555601	con	SY_0.15	5.89518	1.21924	-2.27355	5e-05	0.000905823	yes
ENSGALG00000000295	26:867136-875006	con	SY_0.15	1.14774	0.23505	-2.28776	0.0001	0.00169162	yes
FGF14	1:143252844-143354891	con	SY_0.15	4.33	0.88342	-2.2932	0.0002	0.00296127	yes
ISM1	3:12714884-12753773	con	SY_0.15	14.8462	3.0209	-2.29704	5e-05	0.000905823	yes
NPY	2:31520569-31529071	con	SY_0.15	239.03	47.738	-2.32398	5e-05	0.000905823	yes
ENSGALG00000000568	26:423512-463485	con	SY_0.15	4.38843	0.854116	-2.3612	0.0012	0.0128174	yes
THSD7B	7:31073811-31346787	con	SY_0.15	10.1067	1.93085	-2.388	5e-05	0.000905823	yes
TBX22	4:1519494-1524660	con	SY_0.15	1.32051	0.250263	-2.39958	5e-05	0.000905823	yes
ARHGAP25	22:300018-316574	con	SY_0.15	13.7245	2.5583	-2.4235	5e-05	0.000905823	yes
ENSGALG00000008759	9:16420967-16432613	con	SY_0.15	116.603	21.5483	-2.43596	5e-05	0.000905823	yes
ENSGALG00000017032	1:170511178-170526983	con	SY_0.15	76.9165	14.0716	-2.45051	5e-05	0.000905823	yes
IP6K3	26:4605012-4612987	con	SY_0.15	1.3097	0.23937	-2.45192	0.00135	0.0140969	yes
TMPRSS7	1:88606496-88632094	con	SY_0.15	1.29417	0.234519	-2.46424	0.0004	0.00536492	yes
BMPR1B	4:58732963-58968719	con	SY_0.15	5.47353	0.976999	-2.48604	5e-05	0.000905823	yes
CYP7A1	2:112384149-112391681	con	SY_0.15	6.69253	1.1855	-2.49705	5e-05	0.000905823	yes
BEAN1	11:11619892-11657333	con	SY_0.15	5.72683	1.00834	-2.50576	5e-05	0.000905823	yes
ENSGALG00000034899	2:113829128-113995963	con	SY_0.15	0.629261	0.110525	-2.50929	0.003	0.0261929	yes
PIWIL1	15:3348419-3365105	con	SY_0.15	5.89542	0.980426	-2.58811	5e-05	0.000905823	yes
HES5	21:1416931-1418581	con	SY_0.15	2.44613	0.401914	-2.60554	0.00025	0.00359538	yes
ENSGALG00000015263	1:84584802-84592547	con	SY_0.15	16.8753	2.75528	-2.61464	5e-05	0.000905823	yes
STEAP2	2:21695261-21701570	con	SY_0.15	2.2011	0.357907	-2.62057	0.0004	0.00536492	yes
ENSGALG00000008283	9:15737983-15742734	con	SY_0.15	14.5234	2.30267	-2.65699	5e-05	0.000905823	yes
CD83	2:60893103-60904213	con	SY_0.15	28.6209	4.46571	-2.68011	5e-05	0.000905823	yes
GRIN2A	14:9303506-9451731	con	SY_0.15	0.681711	0.104969	-2.69919	0.00015	0.00237699	yes
ENSGALG00000028602	13:9493413-9530196	con	SY_0.15	7.77372	1.15611	-2.74933	5e-05	0.000905823	yes
PER2	9:5502474-5526782	con	SY_0.15	112.111	16.2638	-2.78519	5e-05	0.000905823	yes
ENSGALG00000012593	Z:40166143-40179451	con	SY_0.15	64.7722	9.24998	-2.80785	5e-05	0.000905823	yes
RORB	Z:36543162-36676401	con	SY_0.15	1.91824	0.272837	-2.81367	0.00015	0.00237699	yes
ENSGALG00000019276	1:65220691-65266821	con	SY_0.15	39.5023	5.5777	-2.82419	5e-05	0.000905823	yes
SLC6A11	12:4050551-4133425	con	SY_0.15	1.13147	0.158842	-2.83254	0.0005	0.00640767	yes
ELOVL3	6:16800939-16805324	con	SY_0.15	5.86115	0.799224	-2.87451	5e-05	0.000905823	yes
SLCO5A1	2:116787852-116850398	con	SY_0.15	3.20985	0.426511	-2.91185	5e-05	0.000905823	yes
ENSGALG00000044800	KQ759531.1:6338-38837	con	SY_0.15	30.1703	3.75344	-3.00684	5e-05	0.000905823	yes
ENPEP	4:58197815-58231230	con	SY_0.15	11.3395	1.37662	-3.04215	5e-05	0.000905823	yes
ENSGALG00000001136	21:1399142-1400827	con	SY_0.15	2.48141	0.295175	-3.07151	0.0001	0.00169162	yes
PTH1R	2:3598939-3705027	con	SY_0.15	1.06279	0.118586	-3.16385	0.0011	0.0119761	yes
TNC	17:3145479-3214636	con	SY_0.15	31.2889	3.40506	-3.1999	5e-05	0.000905823	yes
XAF1	19:9787706-9792676	con	SY_0.15	3.86423	0.412372	-3.22816	0.0001	0.00169162	yes
GABRG1	4:67576490-67624911	con	SY_0.15	5.15091	0.548268	-3.23187	5e-05	0.000905823	yes
RSPO4	20:10087795-10091507	con	SY_0.15	2.30185	0.229762	-3.32458	0.0039	0.0319484	yes
CLDN8	1:104409440-104410115	con	SY_0.15	32.7862	3.20656	-3.35399	5e-05	0.000905823	yes
TMC3	10:12084066-12101401	con	SY_0.15	3.00416	0.264047	-3.50809	5e-05	0.000905823	yes
ENSGALG00000011727	1:47965221-47968879	con	SY_0.15	1.22231	0.0961854	-3.66764	0.0061	0.0451594	yes
DPYS	2:130564106-130592497	con	SY_0.15	15.5057	1.20267	-3.68848	5e-05	0.000905823	yes
AKR1D1	1:56602261-56640860	con	SY_0.15	55.6917	3.32796	-4.06475	5e-05	0.000905823	yes
ENSGALG00000020575	7:36400377-36402792	con	SY_0.15	3.1622	0.171577	-4.204	0.00115	0.0123909	yes
CHST4	11:20098882-20100019	con	SY_0.15	13.9474	0.707442	-4.30124	5e-05	0.000905823	yes
TMEM132D	15:3525978-3717176	con	SY_0.15	0.959039	0.038577	-4.63578	0.0017	0.0169287	yes
ENSGALG00000016483	3:102109980-102119802	con	SY_0.15	8.45591	0.186162	-5.50533	5e-05	0.000905823	yes
ENSGALG00000038804	2:32575509-32576176	con	SY_0.15	1.36152	0.0001	-13.7329	0.0016	0.0162315	yes
ENSGALG00000046201	2:30871019-30878577	con	SY_0.15	2.17274	0.0001	-14.4072	0.0017	0.0169287	yes

## Sheet: SD vs SY0.30
gene	locus	sample_1	sample_2	value_1	value_2	log2(fold_change)	p_value	q_value	significant
RNase_MRP	4:40106903-40107190	con	SY_0.3	0.0001	6.04926	15.8845	0.0048	0.0411813	yes
ENSGALG00000030056	1:159799177-159799510	con	SY_0.3	0.0001	4.40262	15.4261	0.00035	0.00505568	yes
ENSGALG00000015134	1:83204421-83207367	con	SY_0.3	0.0001	1.42287	13.7965	5e-05	0.000952871	yes
ENSGALG00000042897	3:9169423-9170751	con	SY_0.3	0.0001	1.00594	13.2963	0.0001	0.00176485	yes
ENSGALG00000040984	AADN04020838.1:625-2611	con	SY_0.3	0.0001	0.621812	12.6023	5e-05	0.000952871	yes
GAL3ST2	9:4749642-4754097	con	SY_0.3	0.328391	132.044	8.65139	5e-05	0.000952871	yes
ENSGALG00000040355	2:115687084-115692586	con	SY_0.3	12.3481	472.192	5.25701	5e-05	0.000952871	yes
ENSGALG00000021274	17:1423994-1430435	con	SY_0.3	0.246806	5.50368	4.47894	5e-05	0.000952871	yes
AREG	4:45060435-45066903	con	SY_0.3	0.5458	11.1113	4.34751	5e-05	0.000952871	yes
ENSGALG00000042236	AADN04001811.1:20-20443	con	SY_0.3	1.62291	31.0908	4.25983	5e-05	0.000952871	yes
ENSGALG00000045829	12:2850819-2852133	con	SY_0.3	0.291709	5.12369	4.13458	0.0027	0.0267581	yes
FGF1	13:17348658-17363069	con	SY_0.3	6.24914	103.227	4.04601	5e-05	0.000952871	yes
EREG	4:45042455-45050324	con	SY_0.3	0.384967	5.96644	3.95406	0.0001	0.00176485	yes
FOS	5:38264803-38267713	con	SY_0.3	11.4833	158.458	3.7865	5e-05	0.000952871	yes
DRD4	5:520311-526176	con	SY_0.3	1.85221	24.4149	3.72044	5e-05	0.000952871	yes
TSKU	1:193483507-193498274	con	SY_0.3	5.6017	69.3828	3.63064	5e-05	0.000952871	yes
C15orf59	10:2199546-2206730	con	SY_0.3	1.60756	19.086	3.56957	5e-05	0.000952871	yes
SERPINB2	2:67931643-67938135	con	SY_0.3	0.102722	1.14716	3.48124	0.0035	0.032486	yes
PENK	2:111735939-111739272	con	SY_0.3	23.7665	263.279	3.46959	5e-05	0.000952871	yes
ENSGALG00000003203	12:2634370-2635472	con	SY_0.3	1.52991	14.1396	3.20822	5e-05	0.000952871	yes
T	3:43074401-43082303	con	SY_0.3	0.807282	7.39106	3.19464	5e-05	0.000952871	yes
ENSGALG00000033586	AADN04006626.1:20-5521	con	SY_0.3	13.133	115.503	3.13666	5e-05	0.000952871	yes
DUSP4	4:49691810-49696013	con	SY_0.3	0.346947	2.90003	3.06328	0.00025	0.00384813	yes
ENSGALG00000046133	12:2696195-2701876	con	SY_0.3	3.87008	30.6177	2.98393	5e-05	0.000952871	yes
SLC5A9	8:22688087-22754261	con	SY_0.3	2.45676	19.3373	2.97656	0.0001	0.00176485	yes
CDHR1	6:3035223-3068706	con	SY_0.3	0.316352	2.44702	2.95142	5e-05	0.000952871	yes
B3GNT7	9:15318556-15320500	con	SY_0.3	3.4138	25.7472	2.91497	5e-05	0.000952871	yes
ENSGALG00000043582	2:148492681-148497873	con	SY_0.3	21.2269	159.223	2.90709	5e-05	0.000952871	yes
ENSGALG00000044761	KQ759404.1:315979-317695	con	SY_0.3	0.178371	1.30861	2.87508	0.0012	0.0138376	yes
ENSGALG00000036145	7:6803174-6803883	con	SY_0.3	30.594	221.799	2.85793	5e-05	0.000952871	yes
NR4A1	AADN04001839.1:12961-19403	con	SY_0.3	3.25617	22.9116	2.81483	5e-05	0.000952871	yes
ENSGALG00000038746	KQ759576.1:315-9285	con	SY_0.3	0.167737	1.17423	2.80744	0.0001	0.00176485	yes
TC2N	5:44480200-44495004	con	SY_0.3	6.64927	46.3091	2.80003	5e-05	0.000952871	yes
ENSGALG00000043210	AADN04012245.1:4096-4677	con	SY_0.3	145.636	1012.94	2.79811	5e-05	0.000952871	yes
HTR1E	3:76904837-76905953	con	SY_0.3	1.16976	8.10505	2.79261	5e-05	0.000952871	yes
ENSGALG00000045878	12:2903111-2908468	con	SY_0.3	2.86951	19.6792	2.77779	5e-05	0.000952871	yes
PRKG2	4:45935472-45954816	con	SY_0.3	2.65642	17.9041	2.75273	5e-05	0.000952871	yes
Id1	20:10207841-10209004	con	SY_0.3	14.5368	97.5195	2.74598	5e-05	0.000952871	yes
ENSGALG00000024136	25:1069828-1071422	con	SY_0.3	10.5347	70.6589	2.74572	5e-05	0.000952871	yes
GKN2	22:268676-272038	con	SY_0.3	750.621	5030.36	2.74451	5e-05	0.000952871	yes
ENSGALG00000030720	AADN04000704.1:70101-77227	con	SY_0.3	1.57941	10.5251	2.73637	5e-05	0.000952871	yes
GNG4	3:38148553-38161698	con	SY_0.3	1.3407	8.68131	2.69492	5e-05	0.000952871	yes
ENSGALG00000030420	9:15622399-15625994	con	SY_0.3	0.372645	2.39141	2.68199	5e-05	0.000952871	yes
CACNG5	18:7370024-7381626	con	SY_0.3	0.345703	2.18967	2.66311	0.0002	0.0031755	yes
ENSGALG00000008352	10:20173862-20181914	con	SY_0.3	10.1804	64.3994	2.66125	5e-05	0.000952871	yes
OTOP2	18:10636189-10650511	con	SY_0.3	26.0327	164.239	2.6574	5e-05	0.000952871	yes
ENSGALG00000014900	3:63404965-63414848	con	SY_0.3	0.265528	1.62198	2.61082	0.00065	0.00847991	yes
ENSGALG00000013072	1:62496372-62504516	con	SY_0.3	7.59088	46.1349	2.60352	5e-05	0.000952871	yes
ASIC2	27:1939763-2016704	con	SY_0.3	0.738551	4.48479	2.60227	5e-05	0.000952871	yes
GADL1	2:40023359-40105157	con	SY_0.3	16.3025	98.1022	2.58919	5e-05	0.000952871	yes
WNT11	1:193938734-193964975	con	SY_0.3	2.60123	15.3738	2.56321	5e-05	0.000952871	yes
PTHLH	1:72518737-72529849	con	SY_0.3	0.944418	5.55485	2.55625	5e-05	0.000952871	yes
BPIFB2	20:10498384-10503032	con	SY_0.3	1.12105	6.5685	2.55072	5e-05	0.000952871	yes
RNF208	17:1464875-1465673	con	SY_0.3	6.73443	39.1284	2.53859	5e-05	0.000952871	yes
PHLDA2	5:13148443-13149910	con	SY_0.3	18.7371	108.352	2.53176	5e-05	0.000952871	yes
ENSGALG00000035579	6:10376263-10384285	con	SY_0.3	0.457164	2.60026	2.50787	0.0015	0.0166616	yes
TRIB2	3:98314007-98334982	con	SY_0.3	7.67132	43.6226	2.50753	5e-05	0.000952871	yes
ETV4	27:3550455-3562778	con	SY_0.3	2.62504	14.9066	2.50554	5e-05	0.000952871	yes
ENSGALG00000007875	9:15619584-15621929	con	SY_0.3	0.466259	2.61422	2.48718	0.0002	0.0031755	yes
ENSGALG00000033433	5:49376781-49378262	con	SY_0.3	0.575064	3.19528	2.47414	0.0001	0.00176485	yes
ENSGALG00000020982	20:10511916-10517297	con	SY_0.3	4.58613	25.0871	2.4516	5e-05	0.000952871	yes
TRIM35	3:105797590-105802351	con	SY_0.3	23.1972	125.417	2.43472	5e-05	0.000952871	yes
ENSGALG00000036119	AADN04004278.1:5211-7947	con	SY_0.3	2.64978	14.261	2.42813	5e-05	0.000952871	yes
RGS1	8:3620500-3624059	con	SY_0.3	0.205319	1.09588	2.41614	0.0016	0.0176285	yes
CPZ	4:81756779-81791318	con	SY_0.3	2.87443	15.0078	2.38437	5e-05	0.000952871	yes
NR4A3	2:89674439-89694916	con	SY_0.3	3.60943	18.4995	2.35765	5e-05	0.000952871	yes
SLC51A	9:14968947-14971146	con	SY_0.3	0.310298	1.58777	2.35528	0.00235	0.0240063	yes
BDKRB1	5:46461640-46462717	con	SY_0.3	0.425401	2.17424	2.35362	0.00075	0.00953762	yes
ETV5	9:5114527-5123909	con	SY_0.3	6.45532	32.4968	2.33174	5e-05	0.000952871	yes
ENSGALG00000028238	6:23565910-23569213	con	SY_0.3	0.81145	4.08064	2.33022	5e-05	0.000952871	yes
ENSGALG00000030635	7:7918156-7919078	con	SY_0.3	5.00315	25.0943	2.32645	5e-05	0.000952871	yes
SYT8	5:14108058-14112076	con	SY_0.3	8.73724	43.7534	2.32415	5e-05	0.000952871	yes
CDCP2	8:25223274-25226916	con	SY_0.3	3.03348	14.7482	2.28149	5e-05	0.000952871	yes
ENSGALG00000016165	1:109383705-109388083	con	SY_0.3	11.3918	55.2024	2.27674	5e-05	0.000952871	yes
ENSGALG00000008932	17:1407212-1416410	con	SY_0.3	11.7405	56.8403	2.27542	5e-05	0.000952871	yes
ENSGALG00000035572	AADN04017182.1:40-4577	con	SY_0.3	0.248199	1.20112	2.27481	5e-05	0.000952871	yes
ENSGALG00000003644	10:4364154-4365882	con	SY_0.3	6.55518	31.1165	2.24697	5e-05	0.000952871	yes
ENSGALG00000035935	10:8129597-8287922	con	SY_0.3	1.89033	8.93345	2.24058	5e-05	0.000952871	yes
ENSGALG00000035155	AADN04012245.1:5949-7351	con	SY_0.3	2.22312	10.4836	2.23747	5e-05	0.000952871	yes
ENSGALG00000045026	25:1084850-1087056	con	SY_0.3	0.350186	1.63408	2.22228	0.00525	0.0440968	yes
BAIAP2L2	1:51034056-51042293	con	SY_0.3	1.26258	5.84145	2.20995	0.0013	0.0147902	yes
RXRG	8:5154110-5168109	con	SY_0.3	6.01332	27.7687	2.20723	5e-05	0.000952871	yes
ENSGALG00000011281	2:36030780-36036088	con	SY_0.3	16.7122	76.461	2.19382	5e-05	0.000952871	yes
MAP3K15	1:120215623-120287272	con	SY_0.3	2.60638	11.91	2.19205	5e-05	0.000952871	yes
ENSGALG00000006375	9:4743414-4745533	con	SY_0.3	0.745894	3.40428	2.19031	0.00235	0.0240063	yes
ENSGALG00000015192	28:3241766-3243886	con	SY_0.3	0.395503	1.79853	2.18506	0.00585	0.0476652	yes
PLK2	Z:18020073-18025386	con	SY_0.3	8.36724	38.0158	2.18377	5e-05	0.000952871	yes
ENSGALG00000010268	4:34869459-34877868	con	SY_0.3	30.3159	135.472	2.15985	5e-05	0.000952871	yes
KCNJ2	18:8259054-8265799	con	SY_0.3	3.14126	14.003	2.15632	5e-05	0.000952871	yes
ENSGALG00000037382	AADN04013872.1:1737-6353	con	SY_0.3	0.147352	0.651006	2.14341	0.00065	0.00847991	yes
KCTD19	11:1292209-1304961	con	SY_0.3	0.204074	0.901476	2.1432	5e-05	0.000952871	yes
SLC6A17	26:1342525-1349149	con	SY_0.3	0.372677	1.64411	2.1413	0.00025	0.00384813	yes
ENSGALG00000043546	AADN04006481.1:2043-7252	con	SY_0.3	144.762	624.478	2.10897	5e-05	0.000952871	yes
GRIK1	1:104161062-104236516	con	SY_0.3	1.38829	5.91859	2.09195	5e-05	0.000952871	yes
NR4A2	7:36220883-36228064	con	SY_0.3	1.39492	5.90834	2.08257	5e-05	0.000952871	yes
ENSGALG00000043026	AADN04000704.1:45427-51696	con	SY_0.3	3.63457	15.2865	2.0724	5e-05	0.000952871	yes
EAF2	7:26469582-26482932	con	SY_0.3	14.1419	59.3683	2.06972	5e-05	0.000952871	yes
CREBZF	1:190323785-190324640	con	SY_0.3	0.706556	2.94523	2.05951	0.00105	0.0124346	yes
NDUFAF8	18:9347715-9348299	con	SY_0.3	23.5592	95.984	2.0265	5e-05	0.000952871	yes
ANKRD9	5:49728730-49729609	con	SY_0.3	3.47338	14.0711	2.01833	5e-05	0.000952871	yes
MPL	8:19742563-19746687	con	SY_0.3	0.240575	0.969361	2.01055	0.0034	0.0317528	yes
SGK1	3:56365720-56371288	con	SY_0.3	99.1613	391.354	1.98063	5e-05	0.000952871	yes
ENSGALG00000033283	AADN04007470.1:134-9448	con	SY_0.3	0.243742	0.956107	1.97182	0.0057	0.0468923	yes
ENSGALG00000000115	16:189280-190877	con	SY_0.3	11.1193	43.3118	1.9617	5e-05	0.000952871	yes
gallin_2	3:107578250-107578746	con	SY_0.3	25.5889	99.6689	1.96163	0.0022	0.0226955	yes
ENSGALG00000008881	17:1861275-1913128	con	SY_0.3	59.1713	229.717	1.95689	5e-05	0.000952871	yes
ENSGALG00000025996	6:33407190-33426169	con	SY_0.3	0.238467	0.919778	1.9475	5e-05	0.000952871	yes
ENSGALG00000012382	7:31731613-31814126	con	SY_0.3	0.609543	2.33562	1.93801	5e-05	0.000952871	yes
ENSGALG00000011166	5:48265286-48268809	con	SY_0.3	3.19131	12.0294	1.91435	5e-05	0.000952871	yes
ALDH1A1	Z:35893998-35947479	con	SY_0.3	0.822071	3.09105	1.91076	5e-05	0.000952871	yes
PDE4C	28:3997168-4005304	con	SY_0.3	0.48762	1.82789	1.90635	5e-05	0.000952871	yes
EEPD1	2:46965661-47025197	con	SY_0.3	7.61691	28.3984	1.89853	5e-05	0.000952871	yes
ENSGALG00000011324	7:22321912-22324930	con	SY_0.3	3.56399	13.1299	1.88129	5e-05	0.000952871	yes
ENSGALG00000034566	AADN04001110.1:722-11866	con	SY_0.3	3.86743	14.204	1.87685	5e-05	0.000952871	yes
ENSGALG00000038069	2:44531019-44534335	con	SY_0.3	0.237614	0.869441	1.87147	0.0014	0.0157436	yes
ENSGALG00000030898	AADN04012696.1:20-6668	con	SY_0.3	0.467908	1.70666	1.86688	5e-05	0.000952871	yes
ENSGALG00000036187	AADN04008251.1:2042-3583	con	SY_0.3	0.930575	3.34243	1.8447	0.0004	0.0056755	yes
BTBD17	18:9214741-9217838	con	SY_0.3	1.04897	3.73632	1.83265	5e-05	0.000952871	yes
RNaseP_nuc	8:6643266-6643588	con	SY_0.3	12.1021	43.074	1.83156	0.00475	0.0408554	yes
ENSGALG00000010169	3:30323970-30326268	con	SY_0.3	0.939753	3.32518	1.82308	0.00015	0.00251361	yes
ENSGALG00000032910	12:3500783-3501119	con	SY_0.3	68.4619	241.867	1.82084	5e-05	0.000952871	yes
IGFBP1	2:55087643-55093886	con	SY_0.3	1.50549	5.3125	1.81916	5e-05	0.000952871	yes
EGR1	13:18348954-18351756	con	SY_0.3	10.5252	37.1106	1.81798	5e-05	0.000952871	yes
ENSGALG00000038012	AADN04006259.1:3851-6561	con	SY_0.3	2.68945	9.4769	1.8171	5e-05	0.000952871	yes
ATP13A5	9:13147007-13173536	con	SY_0.3	59.6621	209.32	1.81082	5e-05	0.000952871	yes
CARHSP1	14:10077020-10104332	con	SY_0.3	30.1713	105.51	1.80614	5e-05	0.000952871	yes
ENSGALG00000043903	AADN04000704.1:31648-32962	con	SY_0.3	3.67805	12.8601	1.80589	0.0003	0.00443707	yes
ENSGALG00000035558	14:5953226-5954077	con	SY_0.3	0.918563	3.17798	1.79066	0.0052	0.043812	yes
ENSGALG00000039748	AADN04010091.1:4613-8816	con	SY_0.3	0.249353	0.861021	1.78786	0.00455	0.0395856	yes
MYC	2:139845724-139849615	con	SY_0.3	2.70448	9.32564	1.78585	5e-05	0.000952871	yes
ENSGALG00000001369	26:3151010-3153878	con	SY_0.3	0.880091	3.0342	1.78559	0.00015	0.00251361	yes
PTGES	17:6141753-6144217	con	SY_0.3	14.508	49.8857	1.78178	5e-05	0.000952871	yes
ENSGALG00000032405	AADN04000661.1:61201-67038	con	SY_0.3	0.676368	2.31974	1.77808	0.0003	0.00443707	yes
ATF3	3:21874341-21876244	con	SY_0.3	11.1692	38.1331	1.77152	5e-05	0.000952871	yes
STC2	13:9230033-9239581	con	SY_0.3	10.8483	36.9914	1.76973	5e-05	0.000952871	yes
ENSGALG00000032327	7:31820105-31850405	con	SY_0.3	0.575707	1.95086	1.7607	0.00215	0.0222641	yes
NOX5	10:19302362-19308218	con	SY_0.3	0.400249	1.35593	1.76031	0.00075	0.00953762	yes
ENSGALG00000030592	17:6086304-6102773	con	SY_0.3	6.06002	20.4111	1.75196	5e-05	0.000952871	yes
ENSGALG00000039107	9:15341443-15343883	con	SY_0.3	0.404682	1.3563	1.74481	0.00295	0.0286514	yes
ENSGALG00000041329	AADN04005320.1:4659-6021	con	SY_0.3	4.31975	14.4179	1.73884	5e-05	0.000952871	yes
ENSGALG00000002097	10:1317806-1319927	con	SY_0.3	1.45796	4.85669	1.73602	0.00145	0.0161988	yes
TNS4	27:4872137-4879191	con	SY_0.3	7.43894	24.5965	1.72528	5e-05	0.000952871	yes
RUBCNL	1:168099690-168119251	con	SY_0.3	12.7276	41.4881	1.70474	5e-05	0.000952871	yes
APELA	4:23934180-23936941	con	SY_0.3	10.7836	34.8733	1.69328	5e-05	0.000952871	yes
ITM2C	9:5386984-5403209	con	SY_0.3	21.808	69.9381	1.68122	5e-05	0.000952871	yes
ENSGALG00000044493	AADN04009372.1:1518-3227	con	SY_0.3	0.38619	1.23309	1.67489	0.00455	0.0395856	yes
NFKBIZ	1:85395265-85411616	con	SY_0.3	3.2374	10.2884	1.66811	5e-05	0.000952871	yes
MCOLN2	8:16453749-16476405	con	SY_0.3	0.857414	2.71058	1.66054	5e-05	0.000952871	yes
RAB37	18:10524514-10529085	con	SY_0.3	2.43134	7.66666	1.65684	5e-05	0.000952871	yes
ENSGALG00000044863	28:1517176-1518181	con	SY_0.3	1.90253	5.97618	1.6513	0.0006	0.00791872	yes
TXK	4:66975728-66988120	con	SY_0.3	0.571399	1.76338	1.62577	0.00105	0.0124346	yes
SIAT9	4:85969309-85990133	con	SY_0.3	40.7296	125.653	1.6253	5e-05	0.000952871	yes
ATP8B3	28:2286961-2297493	con	SY_0.3	4.49113	13.7846	1.61791	5e-05	0.000952871	yes
OXTR	12:19319351-19323273	con	SY_0.3	0.495216	1.5147	1.6129	0.0044	0.0386762	yes
ENSGALG00000043121	AADN04000661.1:74699-95847	con	SY_0.3	1.72376	5.2707	1.61244	5e-05	0.000952871	yes
CNGA2	4:10960844-10962293	con	SY_0.3	0.477239	1.45261	1.60586	0.00355	0.0328604	yes
TBXAS1	1:55806773-56041222	con	SY_0.3	1.84134	5.57661	1.59863	5e-05	0.000952871	yes
ARSI	13:13183769-13186780	con	SY_0.3	0.775138	2.34221	1.59534	0.00035	0.00505568	yes
SH3PXD2A	6:23612167-24036604	con	SY_0.3	5.4019	16.241	1.5881	0.00325	0.0306464	yes
ENSGALG00000037851	13:16816437-16818397	con	SY_0.3	1.0124	3.04349	1.58795	0.00585	0.0476652	yes
ENSGALG00000030751	15:2634712-2636326	con	SY_0.3	2.76899	8.31568	1.58648	5e-05	0.000952871	yes
ENSGALG00000010926	4:45974554-45977750	con	SY_0.3	137.592	411.856	1.58175	5e-05	0.000952871	yes
ENSGALG00000020679	6:27542959-27567902	con	SY_0.3	0.902199	2.69758	1.58015	0.0003	0.00443707	yes
ENSGALG00000034788	1:37937946-37938426	con	SY_0.3	6.25251	18.6349	1.5755	0.0009	0.0110626	yes
ENSGALG00000040904	AADN04012242.1:1935-6199	con	SY_0.3	1.41979	4.22421	1.57301	5e-05	0.000952871	yes
ENSGALG00000027805	10:2279142-2280927	con	SY_0.3	3.11605	9.23248	1.567	5e-05	0.000952871	yes
ENSGALG00000029151	10:2537061-2540128	con	SY_0.3	0.40289	1.1931	1.56626	0.0012	0.0138376	yes
CRYBA1	19:5961994-5965823	con	SY_0.3	2.31062	6.81966	1.56142	0.00115	0.0134088	yes
ENSGALG00000038056	AADN04021857.1:262-2239	con	SY_0.3	1.70732	5.02713	1.558	0.0002	0.0031755	yes
ENSGALG00000040226	18:8869721-8871282	con	SY_0.3	5.48227	16.1081	1.55494	5e-05	0.000952871	yes
PKD2	4:45959957-45974346	con	SY_0.3	17.6353	51.1684	1.53679	5e-05	0.000952871	yes
NKIRAS1	2:37318199-37327078	con	SY_0.3	3.91888	11.3355	1.53233	5e-05	0.000952871	yes
C8orf4	22:2509376-2510527	con	SY_0.3	40.0564	115.464	1.52734	5e-05	0.000952871	yes
ENSGALG00000008040	15:10972570-10982701	con	SY_0.3	9.19708	26.4843	1.52589	5e-05	0.000952871	yes
ENSGALG00000042660	AADN04004671.1:7070-7764	con	SY_0.3	2.65996	7.63667	1.52154	0.00425	0.0376987	yes
BTC	4:34879239-34884609	con	SY_0.3	1.19937	3.44084	1.52048	0.00075	0.00953762	yes
ENSGALG00000006407	5:13059341-13065622	con	SY_0.3	23.6384	67.4943	1.51363	5e-05	0.000952871	yes
FZD1	2:22162540-22164687	con	SY_0.3	25.1818	71.8319	1.51225	5e-05	0.000952871	yes
TMEM88	21:2197050-2200663	con	SY_0.3	4.82436	13.6208	1.49741	5e-05	0.000952871	yes
CCR7	27:4891170-4899901	con	SY_0.3	2.2022	6.20694	1.49494	5e-05	0.000952871	yes
WNT5B	1:60973500-60989342	con	SY_0.3	6.52709	18.3912	1.4945	5e-05	0.000952871	yes
TRPM2	9:5193101-5205511	con	SY_0.3	0.236839	0.665741	1.49106	0.0008	0.0100328	yes
ABI3BP	1:84985336-85117095	con	SY_0.3	28.8638	80.6817	1.48298	5e-05	0.000952871	yes
Pit1W	1:92852809-92868421	con	SY_0.3	0.33475	0.929377	1.47318	0.00125	0.0143413	yes
ENSGALG00000027534	13:13010725-13018170	con	SY_0.3	71.1879	197.63	1.47309	5e-05	0.000952871	yes
DUSP8	5:14163586-14184836	con	SY_0.3	7.53312	20.9075	1.4727	5e-05	0.000952871	yes
HGFAC	4:82506599-82546305	con	SY_0.3	13.0667	36.2564	1.47234	5e-05	0.000952871	yes
GPC4	4:3791473-3853513	con	SY_0.3	90.8908	250.259	1.46121	5e-05	0.000952871	yes
RRAD	11:11349972-11355598	con	SY_0.3	0.461821	1.26878	1.45803	0.00585	0.0476652	yes
AMH	28:2018795-2022986	con	SY_0.3	0.349876	0.961177	1.45796	0.00265	0.0263201	yes
ENSGALG00000007526	4:11347257-11351079	con	SY_0.3	2.81581	7.72124	1.45529	5e-05	0.000952871	yes
FAM102B	8:1214520-1235188	con	SY_0.3	1.64409	4.50386	1.45388	0.00025	0.00384813	yes
ENSGALG00000028815	24:6257930-6267229	con	SY_0.3	1.031	2.81727	1.45025	0.0001	0.00176485	yes
ENSGALG00000044231	3:3270197-3273416	con	SY_0.3	0.331374	0.902158	1.44492	0.0054	0.0448856	yes
LAMB3	26:3114634-3124587	con	SY_0.3	1.51694	4.08874	1.43049	5e-05	0.000952871	yes
CA2	2:123391256-123408736	con	SY_0.3	134.188	361.022	1.42783	5e-05	0.000952871	yes
ENSGALG00000042006	KQ759616.1:2967-13735	con	SY_0.3	0.600674	1.61518	1.42704	0.00435	0.038311	yes
FABP3	23:593368-596671	con	SY_0.3	17.4598	46.8705	1.42464	5e-05	0.000952871	yes
TRIB1	2:138969887-138972814	con	SY_0.3	3.49639	9.32047	1.41454	0.0001	0.00176485	yes
RDH8	KQ759614.1:4350-7501	con	SY_0.3	1.44789	3.84345	1.40845	0.004	0.0358315	yes
ENTPD3	2:41324890-41345120	con	SY_0.3	4.0321	10.7002	1.40804	5e-05	0.000952871	yes
Sema6B	28:2574359-2580634	con	SY_0.3	1.90617	5.04776	1.40497	5e-05	0.000952871	yes
ENSGALG00000046524	AADN04020224.1:20-2851	con	SY_0.3	0.875351	2.31654	1.40404	0.0023	0.0235841	yes
PLPPR4	8:12223291-12251722	con	SY_0.3	3.47171	9.13297	1.39544	5e-05	0.000952871	yes
JUND	28:3991325-3992297	con	SY_0.3	54.9712	144.596	1.39528	5e-05	0.000952871	yes
ENSGALG00000023542	21:6616877-6622890	con	SY_0.3	7.96923	20.897	1.39078	5e-05	0.000952871	yes
SERPINB5	2:68016051-68022790	con	SY_0.3	7.00436	18.3578	1.39007	5e-05	0.000952871	yes
ENSGALG00000034639	AADN04023583.1:100-973	con	SY_0.3	15.4008	40.3308	1.38888	0.00225	0.0231587	yes
ENSGALG00000036622	KQ759510.1:69870-105675	con	SY_0.3	0.527372	1.37941	1.38716	0.0036	0.0331205	yes
ENSGALG00000037785	AADN04003456.1:9852-13034	con	SY_0.3	47.1541	122.732	1.38005	5e-05	0.000952871	yes
KLF2	28:4398875-4401204	con	SY_0.3	20.6803	53.8144	1.37973	5e-05	0.000952871	yes
SRM	21:4108252-4113303	con	SY_0.3	35.2565	91.4583	1.37522	5e-05	0.000952871	yes
ENSGALG00000029334	AADN04013142.1:2110-6656	con	SY_0.3	4.20714	10.8799	1.37076	0.00395	0.0355474	yes
NPTN	10:2096925-2160818	con	SY_0.3	253.621	654.883	1.36856	5e-05	0.000952871	yes
ENSGALG00000032116	AADN04009389.1:1578-3929	con	SY_0.3	2.92941	7.54779	1.36544	5e-05	0.000952871	yes
ENSGALG00000040560	8:1236601-1237579	con	SY_0.3	3.63247	9.32624	1.36034	0.00015	0.00251361	yes
ENSGALG00000042020	4:50050412-50052876	con	SY_0.3	33.3318	85.5532	1.35992	5e-05	0.000952871	yes
EFCAB10	1:14012403-14013602	con	SY_0.3	23.9252	61.2532	1.35625	0.00075	0.00953762	yes
ACSBG1	10:3686192-3715339	con	SY_0.3	0.404987	1.03612	1.35525	0.00385	0.0349946	yes
ENSGALG00000005374	19:8148608-8155225	con	SY_0.3	25.5959	65.3644	1.35259	5e-05	0.000952871	yes
SDC3	23:439986-458290	con	SY_0.3	7.16916	18.2812	1.35048	5e-05	0.000952871	yes
RGS7	3:36010697-36240970	con	SY_0.3	0.883935	2.25249	1.34951	0.0006	0.00791872	yes
ESYT3	7:28438095-28465232	con	SY_0.3	1.95045	4.9406	1.34088	5e-05	0.000952871	yes
MYOM2	3:91089248-91163384	con	SY_0.3	1.46623	3.71347	1.34065	5e-05	0.000952871	yes
ENSGALG00000042915	AADN04005841.1:6065-8921	con	SY_0.3	4.26115	10.7689	1.33756	0.00015	0.00251361	yes
ENSGALG00000009606	6:31447761-31460698	con	SY_0.3	3.45698	8.7102	1.33319	5e-05	0.000952871	yes
MIDN	28:3074462-3086759	con	SY_0.3	11.081	27.9077	1.33258	5e-05	0.000952871	yes
WIF1	1:33881873-33923658	con	SY_0.3	6.36447	15.9825	1.32838	5e-05	0.000952871	yes
ENSGALG00000025738	3:39921767-39926303	con	SY_0.3	47.4889	119.247	1.3283	5e-05	0.000952871	yes
UCP3	1:195746080-195749014	con	SY_0.3	1.37585	3.45363	1.32779	0.001	0.0119675	yes
RXFP1	4:22025963-22073637	con	SY_0.3	15.9221	39.9058	1.32557	5e-05	0.000952871	yes
ENSGALG00000034594	21:4107701-4108148	con	SY_0.3	56.1219	140.521	1.32415	5e-05	0.000952871	yes
LAPTM4B	2:127896685-127957080	con	SY_0.3	50.6748	126.838	1.32365	5e-05	0.000952871	yes
CHRNA1	7:16865855-16875595	con	SY_0.3	0.6251	1.56361	1.32272	0.0057	0.0468923	yes
ADGRG2	1:120395078-120415594	con	SY_0.3	7.739	19.3439	1.32166	5e-05	0.000952871	yes
ENSGALG00000032108	24:3788079-3791070	con	SY_0.3	2.09721	5.22226	1.31621	5e-05	0.000952871	yes
RHOBTB3	Z:57359527-57387760	con	SY_0.3	0.651406	1.61782	1.31243	0.00325	0.0306464	yes
LCAT	11:1094449-1100820	con	SY_0.3	4.22505	10.4909	1.31211	5e-05	0.000952871	yes
ENSGALG00000044536	AADN04001032.1:6805-7358	con	SY_0.3	9.68193	23.9538	1.30689	0.00145	0.0161988	yes
KLF6	2:11799037-11808009	con	SY_0.3	13.2604	32.8044	1.30676	5e-05	0.000952871	yes
HAPLN2	25:1487085-1489777	con	SY_0.3	0.836663	2.06553	1.30379	0.0043	0.0380183	yes
ISCA2	5:37966201-37967271	con	SY_0.3	12.5368	30.9045	1.30165	0.0002	0.0031755	yes
ENSGALG00000036033	AADN04003031.1:13691-18004	con	SY_0.3	110.598	271.696	1.29667	5e-05	0.000952871	yes
SH3RF2	13:17864462-17882839	con	SY_0.3	5.41774	13.299	1.29555	5e-05	0.000952871	yes
ENSGALG00000029844	AADN04001189.1:8798-10450	con	SY_0.3	1.81081	4.43194	1.29131	0.0024	0.0243889	yes
ENSGALG00000011450	13:13565094-13570421	con	SY_0.3	8.35273	20.4107	1.28901	5e-05	0.000952871	yes
DUSP6	1:43288466-43292808	con	SY_0.3	9.8138	23.9023	1.28426	5e-05	0.000952871	yes
ATP13A2	21:4407475-4423378	con	SY_0.3	23.7088	57.6899	1.2829	5e-05	0.000952871	yes
ENSGALG00000010242	21:4871479-4874774	con	SY_0.3	1.87257	4.55207	1.2815	0.00095	0.0115314	yes
ENSGALG00000037705	AADN04007509.1:445-7936	con	SY_0.3	1.60885	3.90287	1.27851	5e-05	0.000952871	yes
SDC1	3:102005546-102025143	con	SY_0.3	108.364	262.138	1.27443	5e-05	0.000952871	yes
IKBKE	26:2475900-2484810	con	SY_0.3	0.997991	2.41043	1.27219	0.00085	0.0105818	yes
SGK3	2:115613449-115669550	con	SY_0.3	34.4829	83.1943	1.2706	5e-05	0.000952871	yes
ENSGALG00000009458	9:20403470-20563585	con	SY_0.3	2.48324	5.99096	1.27057	5e-05	0.000952871	yes
ENSGALG00000044011	4:77588019-77589735	con	SY_0.3	0.946052	2.28119	1.2698	0.00205	0.02154	yes
KLF4	Z:55703410-55706995	con	SY_0.3	9.64269	23.2444	1.26937	5e-05	0.000952871	yes
ENSGALG00000042293	3:24875244-24897060	con	SY_0.3	0.951351	2.29009	1.26736	0.0031	0.0296845	yes
KIAA0040	8:7091406-7091736	con	SY_0.3	50.3561	121.082	1.26574	0.0011	0.0129032	yes
ENSGALG00000041855	AADN04003965.1:9757-13044	con	SY_0.3	4.78631	11.4978	1.26437	0.00015	0.00251361	yes
ENSGALG00000032637	3:67116257-67116749	con	SY_0.3	140.055	336.243	1.26351	5e-05	0.000952871	yes
BARX2B	24:1345214-1371346	con	SY_0.3	3.99293	9.55797	1.25926	0.0014	0.0157436	yes
ENSGALG00000031183	23:196438-201435	con	SY_0.3	6.20388	14.8493	1.25916	5e-05	0.000952871	yes
AVPR1A	1:33298675-33301273	con	SY_0.3	14.3976	34.2883	1.25189	5e-05	0.000952871	yes
EPHA2	21:4315015-4323502	con	SY_0.3	6.11357	14.5595	1.25188	5e-05	0.000952871	yes
CERK	1:16132581-16175969	con	SY_0.3	13.7759	32.7593	1.24976	5e-05	0.000952871	yes
TP53I11	5:22179396-22220666	con	SY_0.3	9.76714	23.2215	1.24946	5e-05	0.000952871	yes
NIPAL1	4:66993586-66998001	con	SY_0.3	4.02601	9.56993	1.24916	0.0004	0.0056755	yes
ENSGALG00000010719	4:42526293-42543086	con	SY_0.3	1.0231	2.41303	1.23791	0.0014	0.0157436	yes
PDE10A	3:43375110-43466306	con	SY_0.3	5.9658	14.0481	1.23559	5e-05	0.000952871	yes
ENSGALG00000035362	21:4390404-4404128	con	SY_0.3	7.3715	17.3375	1.23387	5e-05	0.000952871	yes
ENSGALG00000029548	AADN04002395.1:5724-8049	con	SY_0.3	1.21759	2.86062	1.2323	0.0036	0.0331205	yes
ENSGALG00000006325	12:10728707-10770062	con	SY_0.3	1.21946	2.85555	1.22752	0.00185	0.0198682	yes
ENSGALG00000012277	1:51010582-51013540	con	SY_0.3	5.28583	12.3378	1.22289	5e-05	0.000952871	yes
CNTFR	Z:8134643-8303354	con	SY_0.3	1.4556	3.39421	1.22146	0.0021	0.0218963	yes
ENSGALG00000042272	AADN04017336.1:1229-4489	con	SY_0.3	1.51614	3.5304	1.21943	0.00075	0.00953762	yes
ITGA11	10:19181612-19214397	con	SY_0.3	1.33026	3.09705	1.21918	0.0002	0.0031755	yes
PURB	AADN04001130.1:19745-20779	con	SY_0.3	2.23433	5.18887	1.21558	0.0043	0.0380183	yes
CLDN10	1:146034758-146094044	con	SY_0.3	374.098	868.175	1.21457	5e-05	0.000952871	yes
C2orf88	7:192382-196571	con	SY_0.3	8.72419	20.2362	1.21385	0.0001	0.00176485	yes
ENSGALG00000026301	3:106147417-106157704	con	SY_0.3	1.5554	3.602	1.21151	0.0003	0.00443707	yes
WSCD2	15:6524247-6533384	con	SY_0.3	4.88384	11.3001	1.21025	5e-05	0.000952871	yes
SOX9	18:8866455-8869366	con	SY_0.3	14.9802	34.5575	1.20594	5e-05	0.000952871	yes
SLC12A9	9:15627596-15640779	con	SY_0.3	13.8639	31.9432	1.20418	5e-05	0.000952871	yes
CDON	24:319876-352144	con	SY_0.3	6.25245	14.3989	1.20347	5e-05	0.000952871	yes
ROBO2	1:96895938-97053385	con	SY_0.3	1.77245	4.07976	1.20274	5e-05	0.000952871	yes
ENSGALG00000042435	AADN04005436.1:10936-13423	con	SY_0.3	51.1694	117.776	1.2027	5e-05	0.000952871	yes
CTSH	10:19886092-20028017	con	SY_0.3	45.5623	104.604	1.19902	0.00265	0.0263201	yes
ENSGALG00000003921	20:5248042-5254471	con	SY_0.3	29.5052	67.6651	1.19744	5e-05	0.000952871	yes
ENSGALG00000007489	6:22140759-22149894	con	SY_0.3	1.91276	4.38274	1.19618	0.00505	0.0428133	yes
CPXM1	AADN04000623.1:106098-113274	con	SY_0.3	1.0114	2.31433	1.19424	0.00245	0.0248229	yes
ENSGALG00000016326	1:118163052-118171318	con	SY_0.3	4.6053	10.5146	1.19103	0.00095	0.0115314	yes
SLC41A3	12:10499368-10520263	con	SY_0.3	20.5574	46.871	1.18904	5e-05	0.000952871	yes
GLI1	KQ759484.1:69693-77272	con	SY_0.3	1.77776	4.04686	1.18674	5e-05	0.000952871	yes
MFSD13A	6:23155413-23168239	con	SY_0.3	14.845	33.7569	1.18521	5e-05	0.000952871	yes
ENSGALG00000034870	AADN04005945.1:3807-8508	con	SY_0.3	81.1511	184.399	1.18415	5e-05	0.000952871	yes
NRTN	28:1518380-1532850	con	SY_0.3	1.50565	3.41862	1.18303	0.00085	0.0105818	yes
ENSGALG00000034519	24:98191-100791	con	SY_0.3	5.84073	13.2402	1.18071	0.0002	0.0031755	yes
ENSGALG00000038442	1:46016847-46028306	con	SY_0.3	5.54651	12.5698	1.1803	5e-05	0.000952871	yes
ENSGALG00000034580	5:57599105-57630953	con	SY_0.3	0.997849	2.25631	1.17707	0.00575	0.0471327	yes
SLC19A2	1:83652331-83662208	con	SY_0.3	7.15914	16.1819	1.17652	0.0001	0.00176485	yes
CD8A	4:86242514-86375718	con	SY_0.3	1.3016	2.93803	1.17456	0.0062	0.0497719	yes
ENSGALG00000044832	Z:39808981-39809938	con	SY_0.3	6.37658	14.3902	1.17423	0.001	0.0119675	yes
GPR162	1:77229604-77233181	con	SY_0.3	6.04921	13.6392	1.17294	5e-05	0.000952871	yes
ENSGALG00000005964	4:3087983-3093028	con	SY_0.3	6.94981	15.6573	1.17179	5e-05	0.000952871	yes
DLC1	4:64904549-64998990	con	SY_0.3	11.6924	26.3196	1.17057	5e-05	0.000952871	yes
ENSGALG00000037976	AADN04003021.1:11214-18050	con	SY_0.3	41.4691	93.3393	1.17045	5e-05	0.000952871	yes
SLC26A9	26:2323803-2335164	con	SY_0.3	2.39982	5.39837	1.1696	0.0002	0.0031755	yes
FBLN7	3:3223263-3229095	con	SY_0.3	1.76458	3.96055	1.16638	0.00035	0.00505568	yes
SCARA5	3:105581244-105594207	con	SY_0.3	8.17326	18.2994	1.16282	5e-05	0.000952871	yes
SEMA3G	12:3114600-3121990	con	SY_0.3	506.077	1132.17	1.16165	5e-05	0.000952871	yes
ENSGALG00000037512	AADN04004636.1:5994-9408	con	SY_0.3	1.02713	2.29779	1.16162	0.0017	0.0184907	yes
B3GNT4	15:5834813-5835917	con	SY_0.3	3.72338	8.3194	1.15987	0.00105	0.0124346	yes
ENSGALG00000005811	12:9077382-9082535	con	SY_0.3	5.38798	12.0373	1.15969	0.0001	0.00176485	yes
A2ML1	1:76082956-76112683	con	SY_0.3	1.35609	3.02277	1.15642	0.0001	0.00176485	yes
NOTUM	18:5104161-5110492	con	SY_0.3	8.52881	19.0044	1.15592	5e-05	0.000952871	yes
ENSGALG00000030736	AADN04001085.1:2448-12591	con	SY_0.3	105.921	235.984	1.1557	5e-05	0.000952871	yes
ST3GAL4	24:444004-452458	con	SY_0.3	1.95173	4.33531	1.15138	0.00315	0.0299735	yes
ENSGALG00000002461	15:2725943-2728629	con	SY_0.3	9.42254	20.8971	1.14911	5e-05	0.000952871	yes
HCLS1	1:70096-82102	con	SY_0.3	0.54152	1.20044	1.14847	0.0034	0.0317528	yes
ODC1	3:97207232-97215296	con	SY_0.3	30.4611	67.504	1.14801	5e-05	0.000952871	yes
CH25H	6:19330372-19331756	con	SY_0.3	2.47639	5.48754	1.14792	0.0008	0.0100328	yes
Zfp36l1	5:28356159-28358209	con	SY_0.3	135.383	299.819	1.14705	5e-05	0.000952871	yes
NOXA1	17:1392827-1406063	con	SY_0.3	13.4701	29.8191	1.14648	5e-05	0.000952871	yes
GDPD2	4:2546261-2553430	con	SY_0.3	6.93831	15.319	1.14267	5e-05	0.000952871	yes
PIK3AP1	6:16723977-16765056	con	SY_0.3	13.695	30.1771	1.1398	5e-05	0.000952871	yes
ENSGALG00000032940	AADN04012076.1:3432-7475	con	SY_0.3	138.344	304.267	1.13708	5e-05	0.000952871	yes
ULK1	15:2638996-2708090	con	SY_0.3	10.2646	22.5595	1.13605	5e-05	0.000952871	yes
ENSGALG00000042353	AADN04016363.1:20-2210	con	SY_0.3	1.64079	3.60384	1.13515	0.00575	0.0471327	yes
PDK4	2:23933442-23942823	con	SY_0.3	5.42841	11.8923	1.13143	5e-05	0.000952871	yes
FAM26E	3:63993332-64012992	con	SY_0.3	30.2063	66.012	1.12788	5e-05	0.000952871	yes
P2RY2	1:195388850-195390862	con	SY_0.3	6.75491	14.7411	1.12583	0.0005	0.0067967	yes
ENSGALG00000016667	3:107884724-107887441	con	SY_0.3	91.3448	199.327	1.12575	5e-05	0.000952871	yes
ENSGALG00000001885	19:4149873-4151555	con	SY_0.3	85.4713	186.488	1.12557	5e-05	0.000952871	yes
ABCA7	28:2927135-2938279	con	SY_0.3	2.08851	4.55298	1.12434	5e-05	0.000952871	yes
VLDLR	Z:26557584-26572292	con	SY_0.3	13.8227	30.0214	1.11896	5e-05	0.000952871	yes
ENSGALG00000046391	AADN04005122.1:11368-13314	con	SY_0.3	1.9972	4.3344	1.11785	0.0054	0.0448856	yes
TNFRSF19	1:177513345-177560920	con	SY_0.3	10.6263	22.9375	1.11007	5e-05	0.000952871	yes
ENSGALG00000031780	8:11023065-11024692	con	SY_0.3	2.99834	6.4695	1.10949	0.0009	0.0110626	yes
ENSGALG00000045182	17:1474149-1480217	con	SY_0.3	10.6614	22.9964	1.10901	5e-05	0.000952871	yes
ENSGALG00000029027	14:13113262-13120464	con	SY_0.3	14.6652	31.6225	1.10855	5e-05	0.000952871	yes
RD3	3:22244500-22283528	con	SY_0.3	4.07235	8.77135	1.10694	0.0059	0.0479291	yes
PLCD1	2:4635396-4683167	con	SY_0.3	6.57724	14.1084	1.101	5e-05	0.000952871	yes
TSPEAR	9:5184137-5190382	con	SY_0.3	1.18225	2.53423	1.10001	0.0032	0.0303431	yes
ENSGALG00000045979	1:101034872-101074782	con	SY_0.3	287.337	615.441	1.09887	5e-05	0.000952871	yes
ENSGALG00000031069	7:18698671-18701521	con	SY_0.3	3.99964	8.54109	1.09455	0.00205	0.02154	yes
HPSE	4:46759038-46763458	con	SY_0.3	1.39514	2.97707	1.09348	0.00425	0.0376987	yes
KY	9:3683202-3694882	con	SY_0.3	2.33283	4.97013	1.0912	0.00045	0.00624811	yes
FRAS1	4:35018317-35181390	con	SY_0.3	1.51148	3.21771	1.09008	5e-05	0.000952871	yes
ENSGALG00000039468	9:22370705-22384584	con	SY_0.3	8.16607	17.3533	1.0875	0.0002	0.0031755	yes
LRIG3	1:31721260-31765031	con	SY_0.3	0.577264	1.22098	1.08074	0.00325	0.0306464	yes
ENSGALG00000034033	AADN04003723.1:9502-15427	con	SY_0.3	4.52557	9.53065	1.07448	5e-05	0.000952871	yes
FAM3B	1:108910670-108917505	con	SY_0.3	10.2829	21.615	1.07179	0.0015	0.0166616	yes
GEM	2:126585919-126594298	con	SY_0.3	33.825	71.0568	1.07088	5e-05	0.000952871	yes
FLVCR2	5:38339288-38363624	con	SY_0.3	2.50028	5.24934	1.07004	0.0013	0.0147902	yes
ENSGALG00000045251	24:5494864-5498918	con	SY_0.3	1.39263	2.92369	1.06998	0.00455	0.0395856	yes
ENSGALG00000034152	AADN04007387.1:4681-8034	con	SY_0.3	7.67408	16.0576	1.06519	5e-05	0.000952871	yes
HS6ST2	4:3612122-3713509	con	SY_0.3	21.676	45.3146	1.06388	5e-05	0.000952871	yes
ENSGALG00000028858	26:3145546-3149510	con	SY_0.3	14.1452	29.566	1.06363	5e-05	0.000952871	yes
CHEK1	24:376424-380172	con	SY_0.3	1.25498	2.61711	1.06032	0.0059	0.0479291	yes
C12orf45	1:54370468-54374950	con	SY_0.3	26.9783	56.2108	1.05905	5e-05	0.000952871	yes
SCARA3	3:105632651-105635951	con	SY_0.3	7.76232	16.1548	1.05741	5e-05	0.000952871	yes
UBE3D	3:78275201-78350497	con	SY_0.3	3.89627	8.07943	1.05216	0.00085	0.0105818	yes
TFRC	9:14984086-14998385	con	SY_0.3	14.8739	30.7938	1.04985	5e-05	0.000952871	yes
KCNJ16	18:8243077-8244367	con	SY_0.3	73.6424	152.362	1.0489	5e-05	0.000952871	yes
ENSGALG00000039645	AADN04014251.1:3569-6178	con	SY_0.3	2.19389	4.53356	1.04715	0.0013	0.0147902	yes
ENSGALG00000014252	1:76146375-76177348	con	SY_0.3	0.95221	1.96765	1.04712	0.00225	0.0231587	yes
RGS2	8:3575630-3578451	con	SY_0.3	36.5745	75.5456	1.04651	5e-05	0.000952871	yes
ENSGALG00000041484	25:1813937-1827733	con	SY_0.3	10.9919	22.6927	1.04578	5e-05	0.000952871	yes
SLC17A9	20:8633022-8647973	con	SY_0.3	1.41874	2.92324	1.04296	0.0011	0.0129032	yes
H2A-VI	1:48193458-48195214	con	SY_0.3	23.1203	47.6005	1.04182	0.0001	0.00176485	yes
ENSGALG00000006469	24:2848178-2865777	con	SY_0.3	5.92018	12.1759	1.04032	5e-05	0.000952871	yes
ENSGALG00000026836	23:4983357-4985730	con	SY_0.3	4.18406	8.60525	1.04031	0.00075	0.00953762	yes
CWH43	4:66651376-66675027	con	SY_0.3	2.9261	6.01005	1.0384	0.00135	0.0152951	yes
PTTG1IP	9:5153143-5158994	con	SY_0.3	15.5298	31.8886	1.03801	5e-05	0.000952871	yes
FJX1	5:19185022-19186177	con	SY_0.3	2.86562	5.88327	1.03777	0.0061	0.0491722	yes
ANGPT4	20:10094791-10101201	con	SY_0.3	4.05998	8.30085	1.03179	0.0007	0.00899424	yes
ID4	2:59931745-59933580	con	SY_0.3	27.3844	55.979	1.03153	5e-05	0.000952871	yes
TOB1	18:10170956-10172858	con	SY_0.3	64.1772	131.047	1.02996	5e-05	0.000952871	yes
ENSGALG00000036515	AADN04012538.1:2576-4568	con	SY_0.3	7.98287	16.2986	1.02977	0.0001	0.00176485	yes
SLC4A11	4:89436575-89527283	con	SY_0.3	1.21165	2.47012	1.02761	0.00315	0.0299735	yes
ENSGALG00000040825	AADN04015798.1:2305-4868	con	SY_0.3	2.67845	5.45667	1.02662	0.0018	0.019516	yes
ENSGALG00000032556	KQ759456.1:613-10468	con	SY_0.3	5.7074	11.6142	1.02498	5e-05	0.000952871	yes
SEMA5A	2:78926049-79169210	con	SY_0.3	9.42485	19.1462	1.02252	5e-05	0.000952871	yes
PTGS2	8:9902169-9910762	con	SY_0.3	11.8345	24.0193	1.02119	5e-05	0.000952871	yes
CREM	2:13001321-13032921	con	SY_0.3	80.1054	162.538	1.02081	5e-05	0.000952871	yes
ENSGALG00000040953	AADN04004349.1:13152-15177	con	SY_0.3	12.7716	25.9061	1.02035	0.0007	0.00899424	yes
OTOG	5:11990009-12080323	con	SY_0.3	1.07192	2.17336	1.01972	0.0005	0.0067967	yes
TMEM45A	1:84910506-84928051	con	SY_0.3	11.9734	24.1703	1.0134	0.0001	0.00176485	yes
SOX4	2:59096906-59098672	con	SY_0.3	11.1344	22.4669	1.01278	5e-05	0.000952871	yes
PGLYRP2	KQ759549.1:40469-46056	con	SY_0.3	6.61445	13.3439	1.01248	0.00055	0.00735875	yes
TSPAN8	1:36146150-36163273	con	SY_0.3	12.023	24.2257	1.01074	0.0006	0.00791872	yes
ENSGALG00000041031	16:28375-52195	con	SY_0.3	6.35552	12.8048	1.0106	5e-05	0.000952871	yes
TRABD2A	Z:52896074-52980564	con	SY_0.3	3.48654	7.01312	1.00826	0.0003	0.00443707	yes
ENSGALG00000030942	AADN04001595.1:13250-20077	con	SY_0.3	2.66605	5.35496	1.00617	0.00015	0.00251361	yes
GRIP2	12:11033188-11140725	con	SY_0.3	1.68449	3.38219	1.00565	0.00035	0.00505568	yes
PLCB2	5:622098-658176	con	SY_0.3	1.76708	3.54777	1.00554	0.0003	0.00443707	yes
ENSGALG00000046379	1:12724256-12735670	con	SY_0.3	3.95115	7.9176	1.00279	0.00045	0.00624811	yes
SPG20	1:172618671-172629426	con	SY_0.3	45.0655	22.5181	-1.00094	5e-05	0.000952871	yes
ENSGALG00000046098	5:17004710-17006082	con	SY_0.3	34.6667	17.3175	-1.00132	0.00175	0.0190042	yes
RUNDC3B	2:20796617-20822950	con	SY_0.3	5.35213	2.67305	-1.00162	5e-05	0.000952871	yes
ROGDI	14:14377043-14389114	con	SY_0.3	45.4361	22.6343	-1.00533	5e-05	0.000952871	yes
ENSGALG00000006717	5:14871235-14911577	con	SY_0.3	1.81477	0.902926	-1.0071	0.00045	0.00624811	yes
TTPA	2:114206087-114218909	con	SY_0.3	15.0273	7.47514	-1.00742	0.0015	0.0166616	yes
GAK	Z:53372517-53437529	con	SY_0.3	21.3945	10.6294	-1.00918	5e-05	0.000952871	yes
MYO1B	7:8014555-8105794	con	SY_0.3	93.5061	46.3959	-1.01106	5e-05	0.000952871	yes
ANXA5	4:54329225-54351750	con	SY_0.3	196.583	97.4436	-1.0125	5e-05	0.000952871	yes
THSD7A	2:26317032-26546888	con	SY_0.3	19.7825	9.80304	-1.01292	5e-05	0.000952871	yes
ITSN1	1:105492243-105575073	con	SY_0.3	17.924	8.88067	-1.01315	5e-05	0.000952871	yes
ENSGALG00000035605	7:18632758-18667992	con	SY_0.3	12.1111	5.99849	-1.01366	0.0003	0.00443707	yes
ENSGALG00000017706	Z:61011124-61071967	con	SY_0.3	37.82	18.7205	-1.01453	5e-05	0.000952871	yes
ENSGALG00000039447	27:4952992-4962757	con	SY_0.3	19.2242	9.51524	-1.01461	5e-05	0.000952871	yes
MSX2	13:9797291-9802103	con	SY_0.3	550.91	272.453	-1.01581	5e-05	0.000952871	yes
SPDEF	26:4355983-4357800	con	SY_0.3	110.02	54.4019	-1.01603	5e-05	0.000952871	yes
SUCLG1	4:86749465-86764991	con	SY_0.3	155.585	76.8619	-1.01736	5e-05	0.000952871	yes
PDE5	4:55000128-55059970	con	SY_0.3	31.881	15.7479	-1.01754	5e-05	0.000952871	yes
ENSGALG00000014071	1:67751003-67983940	con	SY_0.3	57.8051	28.5515	-1.01763	5e-05	0.000952871	yes
FECH	Z:380961-391867	con	SY_0.3	12.7363	6.28935	-1.01796	0.00025	0.00384813	yes
ENSGALG00000006138	20:9941291-9949052	con	SY_0.3	7.38548	3.64299	-1.01957	5e-05	0.000952871	yes
ENSGALG00000040650	10:5672469-5699659	con	SY_0.3	27.8586	13.7316	-1.02062	0.00035	0.00505568	yes
SUCO	8:4492612-4529747	con	SY_0.3	76.9669	37.9142	-1.0215	5e-05	0.000952871	yes
ENSGALG00000045168	1:59380188-59387463	con	SY_0.3	42.6447	21.004	-1.0217	5e-05	0.000952871	yes
ZDHHC7	11:17247047-17262607	con	SY_0.3	48.8246	23.9652	-1.02666	5e-05	0.000952871	yes
CCDC80	1:83535297-83558902	con	SY_0.3	81.8761	40.1879	-1.02668	5e-05	0.000952871	yes
TMTC4	1:143892181-143945330	con	SY_0.3	11.4922	5.63559	-1.02802	5e-05	0.000952871	yes
SYNE3	5:46084880-46114497	con	SY_0.3	1.51778	0.744241	-1.02812	0.00385	0.0349946	yes
NAALADL2	9:18408659-18778560	con	SY_0.3	2.80704	1.37516	-1.02945	0.00195	0.0206327	yes
ENSGALG00000016020	1:105984247-105989738	con	SY_0.3	773.124	378.671	-1.02976	5e-05	0.000952871	yes
SMIM15	Z:19017607-19204794	con	SY_0.3	204.847	99.7696	-1.03787	5e-05	0.000952871	yes
FRMD4A	1:6872403-6904583	con	SY_0.3	14.0404	6.82826	-1.04	0.0001	0.00176485	yes
KCNN2	Z:73269455-73338347	con	SY_0.3	86.8034	42.1431	-1.04246	5e-05	0.000952871	yes
FAM219A	Z:7676382-7770624	con	SY_0.3	40.2877	19.5516	-1.04305	0.00095	0.0115314	yes
ENSGALG00000007710	4:12285789-12294879	con	SY_0.3	77.5233	37.6056	-1.04368	5e-05	0.000952871	yes
ENSGALG00000014126	1:68381260-68385975	con	SY_0.3	31.1371	15.1033	-1.04378	0.0002	0.0031755	yes
ENSGALG00000016186	1:109541317-109564484	con	SY_0.3	26.2291	12.688	-1.0477	5e-05	0.000952871	yes
ENSGALG00000043669	4:47198236-47232926	con	SY_0.3	6.17796	2.98736	-1.04826	0.0003	0.00443707	yes
ENSGALG00000033591	13:3466334-3475168	con	SY_0.3	3.61178	1.74577	-1.04884	0.0011	0.0129032	yes
TSPAN5	4:60174031-60250838	con	SY_0.3	12.0426	5.81992	-1.04908	0.0006	0.00791872	yes
EDN2	23:953065-958386	con	SY_0.3	12.0187	5.80684	-1.04946	5e-05	0.000952871	yes
GRIK4	24:3593269-3711248	con	SY_0.3	3.44485	1.66232	-1.05124	0.00315	0.0299735	yes
SLC35F1	3:63481715-63713128	con	SY_0.3	37.401	18.033	-1.05244	5e-05	0.000952871	yes
CACNB2	2:19149201-19371796	con	SY_0.3	4.66759	2.24937	-1.05315	0.0005	0.0067967	yes
CAV2	1:25079043-25090122	con	SY_0.3	61.9873	29.8446	-1.0545	5e-05	0.000952871	yes
SKP2	Z:10937323-10990078	con	SY_0.3	25.0423	12.0146	-1.05958	0.00065	0.00847991	yes
ENSGALG00000045989	AADN04012511.1:2752-5835	con	SY_0.3	24.2865	11.6397	-1.0611	5e-05	0.000952871	yes
MFSD4A	26:2177658-2191981	con	SY_0.3	15.8079	7.57048	-1.06219	5e-05	0.000952871	yes
NARF	18:3449626-3532446	con	SY_0.3	24.1837	11.5744	-1.06309	0.00475	0.0408554	yes
INO80D	7:12652294-12683284	con	SY_0.3	2.38408	1.1407	-1.06351	0.0002	0.0031755	yes
STK38L	1:68136802-68179594	con	SY_0.3	22.3934	10.683	-1.06775	5e-05	0.000952871	yes
MOV10	26:3544655-3556153	con	SY_0.3	17.6924	8.43727	-1.06828	0.0012	0.0138376	yes
PLA2G15	11:77319-153913	con	SY_0.3	42.1048	20.0418	-1.07097	5e-05	0.000952871	yes
ENSGALG00000010148	1:35908164-36065234	con	SY_0.3	5.2568	2.49766	-1.07361	0.0003	0.00443707	yes
LONRF3	4:16763541-16777172	con	SY_0.3	40.9085	19.3788	-1.07792	5e-05	0.000952871	yes
ENSGALG00000028749	18:9281786-9308577	con	SY_0.3	2374.13	1120.82	-1.08285	0.00565	0.0465937	yes
ADK	6:15100447-15373532	con	SY_0.3	193.107	91.0417	-1.0848	5e-05	0.000952871	yes
TMEM200A	3:57945698-57947168	con	SY_0.3	15.7949	7.43935	-1.08621	5e-05	0.000952871	yes
TLE1	Z:39184186-39254335	con	SY_0.3	7.90552	3.71643	-1.08894	0.0001	0.00176485	yes
PLEKHG1	3:48760266-48790770	con	SY_0.3	4.09095	1.92245	-1.08949	5e-05	0.000952871	yes
MFSD6	7:117164-139219	con	SY_0.3	66.4365	30.9703	-1.10109	5e-05	0.000952871	yes
ENSGALG00000012072	7:28389232-28403654	con	SY_0.3	19.0276	8.85918	-1.10285	5e-05	0.000952871	yes
DIS3L	10:18467489-18482742	con	SY_0.3	30.2388	14.0389	-1.10697	5e-05	0.000952871	yes
LPP	9:14391787-14675571	con	SY_0.3	5.22045	2.41223	-1.11381	0.0001	0.00176485	yes
ENSGALG00000009480	1:27184786-27262852	con	SY_0.3	2.33882	1.08017	-1.11453	0.00035	0.00505568	yes
C1orf198	3:40659666-40679553	con	SY_0.3	23.7081	10.9479	-1.11473	5e-05	0.000952871	yes
RASGRF2	Z:63782411-63904890	con	SY_0.3	2.59967	1.19855	-1.11704	0.00015	0.00251361	yes
STK17A	2:51671798-51696372	con	SY_0.3	33.0716	15.2427	-1.11748	5e-05	0.000952871	yes
DMXL1	Z:71667850-71706761	con	SY_0.3	9.07553	4.17361	-1.12069	5e-05	0.000952871	yes
RHOF	15:5657770-5666735	con	SY_0.3	25.9409	11.9272	-1.12097	5e-05	0.000952871	yes
ENSGALG00000035761	2:22663993-22676382	con	SY_0.3	4.89375	2.25	-1.12101	0.00215	0.0222641	yes
ENSGALG00000016196	1:109708830-109726598	con	SY_0.3	18.237	8.38315	-1.1213	5e-05	0.000952871	yes
FAM83F	1:50300710-50313130	con	SY_0.3	19.4124	8.92335	-1.12132	5e-05	0.000952871	yes
ENSGALG00000046551	20:10700552-10702590	con	SY_0.3	32.1601	14.7563	-1.12394	5e-05	0.000952871	yes
SIPA1L2	3:39308417-39412374	con	SY_0.3	6.37047	2.9198	-1.12553	5e-05	0.000952871	yes
FSD1L	Z:55008369-55037122	con	SY_0.3	5.30822	2.43196	-1.12611	0.0001	0.00176485	yes
PPM1F	15:474489-479338	con	SY_0.3	4.2711	1.95636	-1.12643	0.00305	0.0293296	yes
CEP192	2:97142591-97198921	con	SY_0.3	3.55128	1.62299	-1.12968	5e-05	0.000952871	yes
CMTM4	11:11546670-11573359	con	SY_0.3	33.0008	15.069	-1.13092	0.00025	0.00384813	yes
SYBU	2:132644384-132674117	con	SY_0.3	9.60925	4.38024	-1.13341	0.0002	0.0031755	yes
NCAPG	4:76452107-76480363	con	SY_0.3	4.96655	2.26083	-1.13539	5e-05	0.000952871	yes
ENSGALG00000007646	4:11976830-12094695	con	SY_0.3	19.3534	8.7959	-1.13768	5e-05	0.000952871	yes
CRMP1A	4:79798865-79843362	con	SY_0.3	74.8493	33.9538	-1.14041	5e-05	0.000952871	yes
PTPRB	1:35846166-35891845	con	SY_0.3	8.76402	3.97054	-1.14226	5e-05	0.000952871	yes
ENSGALG00000027887	Z:10372695-10387368	con	SY_0.3	122.234	55.3492	-1.14301	5e-05	0.000952871	yes
PLBD1	1:48929923-48958286	con	SY_0.3	17.7522	8.03321	-1.14395	5e-05	0.000952871	yes
GNA14	Z:37709881-37769362	con	SY_0.3	12.6577	5.71945	-1.14607	0.00015	0.00251361	yes
LDLRAD3	5:19303711-19373731	con	SY_0.3	6.94637	3.13231	-1.14903	0.00185	0.0198682	yes
SMAD9	1:172377066-172398079	con	SY_0.3	41.5838	18.7474	-1.14933	5e-05	0.000952871	yes
SGMS2	4:38259657-38285988	con	SY_0.3	99.0879	44.6502	-1.15004	5e-05	0.000952871	yes
BAALC	2:129934283-129955820	con	SY_0.3	2.82471	1.26963	-1.15369	0.00235	0.0240063	yes
GMNC	9:13853475-13857367	con	SY_0.3	10.0822	4.528	-1.15487	0.0011	0.0129032	yes
PTGR1	Z:66488488-66508364	con	SY_0.3	45.7519	20.5051	-1.15785	5e-05	0.000952871	yes
ITGAV	7:1319203-1364895	con	SY_0.3	30.6435	13.7268	-1.15858	5e-05	0.000952871	yes
ENSGALG00000014998	2:103216423-103248307	con	SY_0.3	18.5857	8.32473	-1.15871	5e-05	0.000952871	yes
ZBTB20	1:82904582-82931844	con	SY_0.3	2.06758	0.925032	-1.16037	0.00185	0.0198682	yes
NSD2	4:83802146-83861078	con	SY_0.3	10.8552	4.85515	-1.1608	5e-05	0.000952871	yes
ADORA2A	15:8526760-8536246	con	SY_0.3	102.888	45.9631	-1.16253	5e-05	0.000952871	yes
ENSGALG00000033226	1:7293528-7352456	con	SY_0.3	15.3856	6.86064	-1.16517	5e-05	0.000952871	yes
PDE7A	2:115238662-115308978	con	SY_0.3	29.1817	13.0057	-1.16592	5e-05	0.000952871	yes
SLC6A2	11:3672298-3735390	con	SY_0.3	1.56263	0.696091	-1.16663	0.0045	0.0393772	yes
VANGL2	25:1256422-1261166	con	SY_0.3	35.383	15.7581	-1.16696	5e-05	0.000952871	yes
SRGAP1	1:33440187-33580652	con	SY_0.3	11.6266	5.16734	-1.16993	5e-05	0.000952871	yes
ENSGALG00000031586	5:34471730-34492617	con	SY_0.3	5.21108	2.31456	-1.17085	0.0012	0.0138376	yes
ARHGEF28	Z:24570222-24702341	con	SY_0.3	61.2938	27.2098	-1.17161	5e-05	0.000952871	yes
LRP8	8:24742973-24890035	con	SY_0.3	2.23671	0.991982	-1.173	0.00075	0.00953762	yes
TNFSF10	9:19373429-19382089	con	SY_0.3	315.067	139.708	-1.17324	5e-05	0.000952871	yes
DLGAP5	5:56376118-56394486	con	SY_0.3	10.943	4.8511	-1.17362	5e-05	0.000952871	yes
FP	8:18795461-18813236	con	SY_0.3	26.1323	11.5708	-1.17534	5e-05	0.000952871	yes
LDHB	1:67084336-67094047	con	SY_0.3	716.339	316.018	-1.18064	5e-05	0.000952871	yes
NRIP1	1:98322193-98325661	con	SY_0.3	29.7507	13.0922	-1.18422	5e-05	0.000952871	yes
GRAMD1B	24:2901397-3006641	con	SY_0.3	8.85049	3.886	-1.18747	5e-05	0.000952871	yes
NR5A2	8:1592875-1687096	con	SY_0.3	3.21465	1.41021	-1.18875	5e-05	0.000952871	yes
ENSGALG00000009291	3:17239078-17259481	con	SY_0.3	79.7011	34.8371	-1.19398	5e-05	0.000952871	yes
PRSS23	1:188867452-188868571	con	SY_0.3	22.6019	9.86291	-1.19636	5e-05	0.000952871	yes
MECOM	9:20063009-20363223	con	SY_0.3	145.076	63.305	-1.19642	5e-05	0.000952871	yes
GPR158	2:16497662-16678504	con	SY_0.3	1.72564	0.752805	-1.19678	0.001	0.0119675	yes
PLPP4	6:30550104-30594979	con	SY_0.3	9.3429	4.06944	-1.19904	0.0012	0.0138376	yes
KLHL14	2:106913657-106974273	con	SY_0.3	14.1417	6.15092	-1.20108	5e-05	0.000952871	yes
HMCN1	8:10119574-10310613	con	SY_0.3	13.0325	5.64815	-1.20626	5e-05	0.000952871	yes
SLC39A8	4:61121024-61141216	con	SY_0.3	778.32	336.794	-1.2085	5e-05	0.000952871	yes
ZDHHC21	Z:31657272-31700916	con	SY_0.3	21.516	9.29998	-1.21011	5e-05	0.000952871	yes
MAST4	Z:21007929-21296657	con	SY_0.3	18.3566	7.92433	-1.21194	5e-05	0.000952871	yes
SCRN1	2:33940268-33974780	con	SY_0.3	16.0097	6.86325	-1.22198	5e-05	0.000952871	yes
KCNK5	3:29274505-29304143	con	SY_0.3	20.1111	8.61122	-1.2237	5e-05	0.000952871	yes
STARD8	4:559644-600269	con	SY_0.3	34.949	14.9612	-1.22403	5e-05	0.000952871	yes
PDXK	1:110069291-110113597	con	SY_0.3	87.9509	37.6414	-1.22438	5e-05	0.000952871	yes
ENSGALG00000012847	1:56693092-56705912	con	SY_0.3	7.55647	3.23184	-1.22536	0.00025	0.00384813	yes
ENSGALG00000011086	3:40139163-40141584	con	SY_0.3	310.861	132.679	-1.22833	5e-05	0.000952871	yes
CRY1	1:53642387-53676704	con	SY_0.3	106.334	45.2821	-1.23159	5e-05	0.000952871	yes
TMEM106B	2:26625915-26756149	con	SY_0.3	97.838	41.6527	-1.23199	5e-05	0.000952871	yes
ENSGALG00000044716	4:54141943-54156023	con	SY_0.3	6.09506	2.59334	-1.23283	5e-05	0.000952871	yes
GAREM1	2:106691609-106844648	con	SY_0.3	11.3398	4.82148	-1.23385	0.00015	0.00251361	yes
ENSGALG00000019077	1:177369324-177371367	con	SY_0.3	8.59679	3.64958	-1.23607	5e-05	0.000952871	yes
PTAR1	Z:34801344-34828236	con	SY_0.3	6.08534	2.58209	-1.2368	0.0002	0.0031755	yes
FMO3	8:4824821-4831264	con	SY_0.3	13.8052	5.82438	-1.24504	5e-05	0.000952871	yes
ENSGALG00000005349	14:6029102-6043043	con	SY_0.3	1.99708	0.840811	-1.24804	0.0009	0.0110626	yes
ENSGALG00000043332	6:10970973-11009124	con	SY_0.3	2.50759	1.0556	-1.24824	0.00345	0.0321095	yes
MYCL	23:5548133-5550962	con	SY_0.3	8.0824	3.39162	-1.25281	0.0003	0.00443707	yes
ENSGALG00000035818	AADN04017758.1:2195-4276	con	SY_0.3	10.3072	4.31928	-1.25478	0.0007	0.00899424	yes
ENSGALG00000009830	4:29895486-29925015	con	SY_0.3	70.6046	29.4906	-1.25951	5e-05	0.000952871	yes
ZNF366	Z:25200048-25213586	con	SY_0.3	2.47966	1.03508	-1.26041	0.0003	0.00443707	yes
CCDC14	7:27529906-27538194	con	SY_0.3	1.58019	0.657818	-1.26434	0.0004	0.0056755	yes
ENSGALG00000023936	21:2221201-2229269	con	SY_0.3	11.1747	4.64777	-1.26562	5e-05	0.000952871	yes
KLHL36	11:17068156-17080221	con	SY_0.3	14.233	5.9101	-1.26798	5e-05	0.000952871	yes
ENSGALG00000032750	26:1156251-1162125	con	SY_0.3	3.58896	1.48521	-1.2729	5e-05	0.000952871	yes
COL12A1	3:81088529-81188721	con	SY_0.3	3.29865	1.36435	-1.27367	5e-05	0.000952871	yes
SALL4	20:13306171-13320343	con	SY_0.3	28.7042	11.8479	-1.27663	5e-05	0.000952871	yes
DDAH1	8:16296874-16342908	con	SY_0.3	6.93014	2.85491	-1.27944	0.00025	0.00384813	yes
AMN1	1:59452518-59473212	con	SY_0.3	16.78	6.88916	-1.28434	5e-05	0.000952871	yes
ENSGALG00000031225	1:178671357-178682347	con	SY_0.3	3.61806	1.48472	-1.28502	0.0016	0.0176285	yes
PIP5K1B	Z:34474301-34571297	con	SY_0.3	51.6322	21.1249	-1.28933	5e-05	0.000952871	yes
NDC80	2:101458365-101477125	con	SY_0.3	2.71287	1.10857	-1.29112	0.00155	0.017161	yes
CYP2U1	4:38240516-38250340	con	SY_0.3	11.7647	4.78813	-1.29693	5e-05	0.000952871	yes
SLC6A14	4:3062273-3075508	con	SY_0.3	154.967	63.037	-1.29769	5e-05	0.000952871	yes
ENSGALG00000006724	9:3082799-3338435	con	SY_0.3	9.60295	3.88894	-1.3041	5e-05	0.000952871	yes
ENSGALG00000027056	1:59476228-59483268	con	SY_0.3	29.3797	11.8919	-1.30484	5e-05	0.000952871	yes
SCNN1B	14:7001816-7013562	con	SY_0.3	234.802	95.0251	-1.30506	5e-05	0.000952871	yes
ZFAND5	Z:35736062-35750582	con	SY_0.3	55.1614	22.24	-1.3105	5e-05	0.000952871	yes
PAC1	2:1391173-1489728	con	SY_0.3	1.9736	0.794665	-1.31241	0.0053	0.0443252	yes
EPSTI1	1:166655213-166707862	con	SY_0.3	2.60957	1.0487	-1.31521	0.0007	0.00899424	yes
ENSGALG00000039939	18:6011513-6014434	con	SY_0.3	49.8139	19.9902	-1.31726	5e-05	0.000952871	yes
TSHZ1	2:91647485-91699829	con	SY_0.3	10.8556	4.35537	-1.31757	5e-05	0.000952871	yes
KIF26B	3:34440792-34727673	con	SY_0.3	3.38069	1.35229	-1.32192	5e-05	0.000952871	yes
SNX16	2:122059413-122083050	con	SY_0.3	30.6268	12.2326	-1.32406	5e-05	0.000952871	yes
OSGIN1	11:2658955-2694119	con	SY_0.3	106.172	42.4056	-1.32407	5e-05	0.000952871	yes
ENSGALG00000010513	6:35336652-35342219	con	SY_0.3	9.35474	3.73433	-1.32485	0.00035	0.00505568	yes
ENSGALG00000027494	9:22040833-22049322	con	SY_0.3	2.04059	0.810736	-1.33168	0.00195	0.0206327	yes
PCBP4	12:3131563-3134816	con	SY_0.3	6.22634	2.4713	-1.33311	0.00235	0.0240063	yes
MSMB	6:17836545-17840466	con	SY_0.3	118.853	46.9931	-1.33865	5e-05	0.000952871	yes
AP1S2	1:121850196-121884181	con	SY_0.3	101.925	40.1627	-1.34357	5e-05	0.000952871	yes
ATP8A1	4:68573328-68662442	con	SY_0.3	42.7023	16.8207	-1.34408	5e-05	0.000952871	yes
SGPP2	9:7968540-7990682	con	SY_0.3	13.051	5.11843	-1.35039	5e-05	0.000952871	yes
DAO	15:6661768-6666141	con	SY_0.3	6.74015	2.64326	-1.35046	5e-05	0.000952871	yes
Dab1	8:25927811-26016403	con	SY_0.3	14.4101	5.6384	-1.35372	5e-05	0.000952871	yes
PODN	8:24634399-24653942	con	SY_0.3	10.3617	4.04762	-1.35612	5e-05	0.000952871	yes
GPM6B	1:122827172-122931852	con	SY_0.3	22.3699	8.73028	-1.35746	5e-05	0.000952871	yes
HTR1B	3:80361172-80362338	con	SY_0.3	156.367	60.9651	-1.35888	5e-05	0.000952871	yes
GRHL2	2:129435467-129485773	con	SY_0.3	30.6296	11.8972	-1.3643	5e-05	0.000952871	yes
WIPF3	2:33916993-33935957	con	SY_0.3	63.641	24.6905	-1.366	5e-05	0.000952871	yes
ENSGALG00000041296	3:107272766-107275351	con	SY_0.3	295.696	114.665	-1.36669	5e-05	0.000952871	yes
ST8SIA4	Z:50645749-50700107	con	SY_0.3	2.01786	0.782026	-1.36754	0.0012	0.0138376	yes
DSE	3:64034687-64054970	con	SY_0.3	29.8496	11.5252	-1.37292	5e-05	0.000952871	yes
RPIA	4:86722232-86737031	con	SY_0.3	181.295	69.8098	-1.37684	5e-05	0.000952871	yes
ENSGALG00000014324	1:75871015-75879214	con	SY_0.3	229.127	88.0179	-1.38028	5e-05	0.000952871	yes
SMAD3	10:18812336-18872532	con	SY_0.3	24.3767	9.36234	-1.38056	5e-05	0.000952871	yes
ENSGALG00000039528	6:20124538-20190565	con	SY_0.3	2.10535	0.808094	-1.38147	0.00015	0.00251361	yes
ENSGALG00000041621	2:148464757-148470888	con	SY_0.3	226.372	86.886	-1.3815	5e-05	0.000952871	yes
ENSGALG00000016732	3:111265110-111274122	con	SY_0.3	23.8261	9.13938	-1.38237	5e-05	0.000952871	yes
SFMBT1	12:891386-950945	con	SY_0.3	2.88816	1.10719	-1.38325	5e-05	0.000952871	yes
MCF2	4:5064751-5112915	con	SY_0.3	40.6946	15.5835	-1.38482	5e-05	0.000952871	yes
CHST1	5:23993358-23994615	con	SY_0.3	4.69283	1.79647	-1.38529	0.00185	0.0198682	yes
angiopoietin-2B	3:88911017-89032445	con	SY_0.3	36.5152	13.977	-1.38544	5e-05	0.000952871	yes
NOS1	15:11357296-11386044	con	SY_0.3	38.039	14.5388	-1.38757	5e-05	0.000952871	yes
GPR75	3:3016355-3017966	con	SY_0.3	19.0143	7.24472	-1.39209	5e-05	0.000952871	yes
PAN3	1:175945882-176020918	con	SY_0.3	43.8698	16.5453	-1.4068	5e-05	0.000952871	yes
ARHGEF26	9:23309858-23353078	con	SY_0.3	33.5777	12.6596	-1.40728	5e-05	0.000952871	yes
PACSIN1	26:4361059-4364487	con	SY_0.3	13.5657	5.11049	-1.40843	5e-05	0.000952871	yes
SMIM5	18:4833138-4870020	con	SY_0.3	55.5625	20.7558	-1.4206	5e-05	0.000952871	yes
MLLT3	Z:34030582-34141800	con	SY_0.3	35.9691	13.4058	-1.42391	5e-05	0.000952871	yes
GATA2	12:9198667-9214691	con	SY_0.3	250.557	93.2318	-1.42625	5e-05	0.000952871	yes
SLC4A7	2:38586293-38666471	con	SY_0.3	96.8808	35.9741	-1.42925	5e-05	0.000952871	yes
FNDC5	23:5294113-5304982	con	SY_0.3	3.39672	1.25874	-1.43216	0.00265	0.0263201	yes
SLC25A47	5:48638644-48642763	con	SY_0.3	3.0068	1.10974	-1.438	0.00395	0.0355474	yes
ENSGALG00000004946	9:9318985-9370173	con	SY_0.3	0.898288	0.331361	-1.43877	0.0004	0.0056755	yes
PRR5L	5:19446689-19474414	con	SY_0.3	3.0501	1.12416	-1.44002	0.00375	0.034177	yes
ENSGALG00000042157	Z:37483155-37496430	con	SY_0.3	5.74577	2.11443	-1.44223	0.0027	0.0267581	yes
SLC6A4	19:6202078-6214207	con	SY_0.3	6.67293	2.45487	-1.44267	5e-05	0.000952871	yes
DOK6	2:94050943-94295278	con	SY_0.3	7.11145	2.61497	-1.44335	5e-05	0.000952871	yes
ENSGALG00000036437	4:54168181-54195086	con	SY_0.3	3.69075	1.35351	-1.4472	0.0001	0.00176485	yes
RRM2	3:96931858-96936929	con	SY_0.3	1.30246	0.477448	-1.44783	0.0044	0.0386762	yes
ENSGALG00000045887	Z:73171692-73220631	con	SY_0.3	2.02242	0.739099	-1.45224	0.0054	0.0448856	yes
ENSGALG00000023601	3:13782735-13795714	con	SY_0.3	35.5922	12.9761	-1.45571	5e-05	0.000952871	yes
HPX	1:194439298-194442894	con	SY_0.3	600.866	218.501	-1.45941	5e-05	0.000952871	yes
LPCAT1	2:86095768-86157882	con	SY_0.3	8.15105	2.96142	-1.4607	5e-05	0.000952871	yes
MOB3B	Z:68630254-68662403	con	SY_0.3	5.03931	1.82485	-1.46545	0.0019	0.0202453	yes
C7	Z:12937308-12956457	con	SY_0.3	5.07793	1.83646	-1.46732	5e-05	0.000952871	yes
PTPN14	3:21125848-21184909	con	SY_0.3	3.22822	1.1673	-1.46756	5e-05	0.000952871	yes
DCAF12	Z:7511920-7540939	con	SY_0.3	79.8962	28.8356	-1.47027	5e-05	0.000952871	yes
ARFGEF3	3:54570806-54650676	con	SY_0.3	14.5393	5.21884	-1.47815	5e-05	0.000952871	yes
SOX6	5:11115669-11366088	con	SY_0.3	2.37015	0.849363	-1.48053	0.0002	0.0031755	yes
ENSGALG00000032851	2:110860249-110861917	con	SY_0.3	169.633	60.5298	-1.4867	5e-05	0.000952871	yes
ENSGALG00000015833	3:77241400-77263253	con	SY_0.3	1.88648	0.670759	-1.49183	0.00165	0.0180334	yes
MYRF	5:183510-218679	con	SY_0.3	28.549	10.1144	-1.49703	5e-05	0.000952871	yes
CDO1	Z:72942622-72952484	con	SY_0.3	15.6873	5.55551	-1.4976	5e-05	0.000952871	yes
ENSGALG00000013427	4:61488305-61532397	con	SY_0.3	38.2498	13.5339	-1.49888	5e-05	0.000952871	yes
PER3	21:272582-291803	con	SY_0.3	4.0734	1.44099	-1.49918	5e-05	0.000952871	yes
SOX5	1:65938355-66226982	con	SY_0.3	19.2575	6.76982	-1.50823	5e-05	0.000952871	yes
SNX10	2:32275229-32308776	con	SY_0.3	15.3493	5.36228	-1.51725	5e-05	0.000952871	yes
SLC26A5	1:13005188-13038545	con	SY_0.3	25.6318	8.9317	-1.52093	5e-05	0.000952871	yes
CP49	2:42607306-42777858	con	SY_0.3	2.42018	0.842408	-1.52252	0.0009	0.0110626	yes
ENSGALG00000039459	18:6011513-6014434	con	SY_0.3	76.3597	26.4298	-1.53064	0.00015	0.00251361	yes
ADAMTS8	24:1657702-1668923	con	SY_0.3	13.8205	4.77598	-1.53294	5e-05	0.000952871	yes
MTCL1	2:98980102-99067476	con	SY_0.3	4.39054	1.51548	-1.53463	5e-05	0.000952871	yes
SSTR2	18:9063415-9065697	con	SY_0.3	2.06208	0.709774	-1.53867	0.00045	0.00624811	yes
ENSGALG00000000378	22:1190200-1195716	con	SY_0.3	18.1305	6.21637	-1.54428	0.00025	0.00384813	yes
HEY2	3:60044510-60053824	con	SY_0.3	38.4408	13.147	-1.54791	5e-05	0.000952871	yes
ENSGALG00000002854	Z:9459676-9469737	con	SY_0.3	4.11333	1.40316	-1.55163	5e-05	0.000952871	yes
ENSGALG00000015234	2:108410426-108486252	con	SY_0.3	1.66216	0.563749	-1.55993	0.00475	0.0408554	yes
USP13	9:17437021-17477511	con	SY_0.3	24.6626	8.35884	-1.56095	5e-05	0.000952871	yes
ENSGALG00000030769	4:61536298-61629758	con	SY_0.3	20.5006	6.94107	-1.56244	5e-05	0.000952871	yes
ENSGALG00000043000	AADN04001516.1:10347-11870	con	SY_0.3	19.082	6.42901	-1.56954	0.0003	0.00443707	yes
ENSGALG00000013912	3:55353547-55358626	con	SY_0.3	43.0183	14.479	-1.57099	5e-05	0.000952871	yes
ABCA4	8:13683888-13758163	con	SY_0.3	4.69109	1.57458	-1.57496	5e-05	0.000952871	yes
TLR3	4:61707201-61720669	con	SY_0.3	33.675	11.2976	-1.57566	5e-05	0.000952871	yes
ENSGALG00000019847	3:107860149-107861091	con	SY_0.3	422.99	141.846	-1.57629	5e-05	0.000952871	yes
HLF	18:5980975-6011456	con	SY_0.3	73.3191	24.5601	-1.57787	5e-05	0.000952871	yes
ENSGALG00000030855	2:44262333-44346921	con	SY_0.3	191.036	63.6672	-1.58522	5e-05	0.000952871	yes
PCGF5	6:19720930-19745244	con	SY_0.3	15.7142	5.23032	-1.5871	5e-05	0.000952871	yes
KRT19	27:4972721-4977524	con	SY_0.3	867.737	288.638	-1.58799	5e-05	0.000952871	yes
MET	1:24918556-25006337	con	SY_0.3	6.8113	2.25431	-1.59524	5e-05	0.000952871	yes
ENSGALG00000044238	1:161278341-161284057	con	SY_0.3	0.771655	0.254327	-1.60127	0.00275	0.0270958	yes
NBEAL1	7:13734318-13819369	con	SY_0.3	32.4868	10.6961	-1.60276	5e-05	0.000952871	yes
STEAP2	2:21695261-21701570	con	SY_0.3	2.23049	0.733784	-1.60393	0.0013	0.0147902	yes
ATP7B	1:170322065-170351964	con	SY_0.3	1.13908	0.3739	-1.60714	0.0001	0.00176485	yes
ENSGALG00000011962	4:54545703-54562470	con	SY_0.3	21.8665	7.12032	-1.61871	5e-05	0.000952871	yes
SOX13	26:1683808-1703852	con	SY_0.3	96.0428	31.2388	-1.62034	5e-05	0.000952871	yes
IRX3	11:4648343-4649811	con	SY_0.3	6.66273	2.1604	-1.62482	0.0001	0.00176485	yes
HLCS	1:106864785-106977050	con	SY_0.3	14.2052	4.60474	-1.62523	5e-05	0.000952871	yes
LHFPL2	Z:22593955-22715343	con	SY_0.3	7.23361	2.33536	-1.63107	5e-05	0.000952871	yes
Edar	1:136466223-136492266	con	SY_0.3	3.23348	1.04345	-1.63173	0.00035	0.00505568	yes
ENSGALG00000041805	8:7080564-7082231	con	SY_0.3	4.31275	1.38181	-1.64204	0.0004	0.0056755	yes
DENND4C	Z:33679445-33728466	con	SY_0.3	30.4745	9.72338	-1.64807	5e-05	0.000952871	yes
MMEL1	21:1372223-1393392	con	SY_0.3	1.58241	0.502671	-1.65443	0.0005	0.0067967	yes
ENSGALG00000038879	AADN04001262.1:9086-13366	con	SY_0.3	7.65682	2.427	-1.65757	5e-05	0.000952871	yes
ENSGALG00000033925	4:83722054-83733392	con	SY_0.3	197.308	62.143	-1.66679	5e-05	0.000952871	yes
ENSGALG00000039404	3:17622964-17626572	con	SY_0.3	3.77647	1.18811	-1.66836	0.00405	0.0362317	yes
SHMT1	14:5132125-5136038	con	SY_0.3	8.3747	2.62881	-1.67163	5e-05	0.000952871	yes
ENSGALG00000045737	18:2213177-2218737	con	SY_0.3	7.0477	2.20332	-1.67748	0.0008	0.0100328	yes
SCNN1G	14:7019085-7028500	con	SY_0.3	190.416	59.23	-1.68475	5e-05	0.000952871	yes
ENSGALG00000041372	2:44156260-44201027	con	SY_0.3	37.3847	11.6012	-1.68818	5e-05	0.000952871	yes
ENSGALG00000001136	21:1399142-1400827	con	SY_0.3	2.50861	0.772935	-1.69847	0.00105	0.0124346	yes
CSGALNACT2	6:4770392-4784692	con	SY_0.3	51.0909	15.7051	-1.70184	5e-05	0.000952871	yes
BRK-3	7:11874179-11969327	con	SY_0.3	97.6822	30.0086	-1.70272	5e-05	0.000952871	yes
XAF1	19:9787706-9792676	con	SY_0.3	3.91111	1.19062	-1.71586	0.0025	0.0252168	yes
TNR	8:7030142-7079007	con	SY_0.3	2.52989	0.764585	-1.72633	5e-05	0.000952871	yes
NLGN3	4:2335564-2353557	con	SY_0.3	10.6016	3.20063	-1.72785	5e-05	0.000952871	yes
PIGR	26:2579725-2590284	con	SY_0.3	104.698	31.5894	-1.72872	5e-05	0.000952871	yes
GJB1	4:2330649-2333141	con	SY_0.3	36.4992	10.9978	-1.73065	5e-05	0.000952871	yes
THSD4	10:6291472-6524226	con	SY_0.3	15.7635	4.74975	-1.73066	5e-05	0.000952871	yes
GPAM	6:26635202-26660787	con	SY_0.3	24.2306	7.23126	-1.74451	5e-05	0.000952871	yes
SLC2A12	3:56395892-56424175	con	SY_0.3	87.4362	25.9419	-1.75294	5e-05	0.000952871	yes
RERG	1:62659917-62765595	con	SY_0.3	3.96433	1.17522	-1.75414	0.00145	0.0161988	yes
ENSGALG00000021092	9:9524182-9530093	con	SY_0.3	0.820897	0.242858	-1.75709	0.00265	0.0263201	yes
GPR103	4:54427477-54447160	con	SY_0.3	1.60067	0.473096	-1.75847	0.00155	0.017161	yes
RAB32	3:47006776-47025939	con	SY_0.3	32.612	9.6057	-1.76344	5e-05	0.000952871	yes
ADCY8	2:140988803-141106986	con	SY_0.3	2.56127	0.753422	-1.76533	5e-05	0.000952871	yes
ENSGALG00000044155	1:47946786-47951465	con	SY_0.3	56.8831	16.6904	-1.76898	5e-05	0.000952871	yes
DOCK10	9:8507494-8609908	con	SY_0.3	8.61742	2.52134	-1.77307	5e-05	0.000952871	yes
CNTNAP5	7:24545118-24814619	con	SY_0.3	1.005	0.292923	-1.7786	0.0001	0.00176485	yes
NEFL	22:952290-957139	con	SY_0.3	9.26582	2.69421	-1.78205	5e-05	0.000952871	yes
TESC	15:11411292-11414048	con	SY_0.3	35.5521	10.2629	-1.7925	5e-05	0.000952871	yes
ENSGALG00000007080	13:17126955-17144545	con	SY_0.3	26.7616	7.7164	-1.79416	5e-05	0.000952871	yes
EPHA7	3:74171527-74327787	con	SY_0.3	0.884773	0.253787	-1.80169	0.0002	0.0031755	yes
DLG1	9:12488711-12640489	con	SY_0.3	69.8776	19.964	-1.80743	5e-05	0.000952871	yes
ASIC4	7:22207311-22226474	con	SY_0.3	1.79034	0.511285	-1.80804	0.0002	0.0031755	yes
ENSGALG00000041089	Z:9474821-9588748	con	SY_0.3	1.45195	0.4112	-1.82008	5e-05	0.000952871	yes
VAMP1	1:76915076-76917933	con	SY_0.3	17.06	4.8307	-1.82031	5e-05	0.000952871	yes
BEAN1	11:11619892-11657333	con	SY_0.3	5.80553	1.63767	-1.82579	5e-05	0.000952871	yes
ELAVL4	8:23628028-23700939	con	SY_0.3	3.65671	1.02253	-1.8384	5e-05	0.000952871	yes
SEPSECS	4:74019755-74043563	con	SY_0.3	52.4491	14.6625	-1.83879	5e-05	0.000952871	yes
E2F7	1:38293245-38312033	con	SY_0.3	1.42575	0.394171	-1.85483	5e-05	0.000952871	yes
COL15A1	2:55990570-56094186	con	SY_0.3	2.10241	0.578102	-1.86264	5e-05	0.000952871	yes
ENSGALG00000026383	1:123358483-123360112	con	SY_0.3	1992.73	536.631	-1.89274	5e-05	0.000952871	yes
HAS2	2:137467300-137485205	con	SY_0.3	171.191	45.8566	-1.90041	5e-05	0.000952871	yes
NPTX1	18:9564599-9566930	con	SY_0.3	5.70529	1.52495	-1.90354	5e-05	0.000952871	yes
Lrrn1	12:18314288-18331017	con	SY_0.3	7.36188	1.9617	-1.90797	5e-05	0.000952871	yes
ENSGALG00000012010	4:55453741-55481442	con	SY_0.3	1.32036	0.351001	-1.91138	0.00455	0.0395856	yes
ENSGALG00000039269	18:9594759-9619312	con	SY_0.3	4.01822	1.05809	-1.92509	5e-05	0.000952871	yes
GABRG1	4:67576490-67624911	con	SY_0.3	5.21347	1.37245	-1.92549	5e-05	0.000952871	yes
ENSGALG00000008283	9:15737983-15742734	con	SY_0.3	14.7255	3.87436	-1.92629	5e-05	0.000952871	yes
TOX2	20:2376244-2489922	con	SY_0.3	7.44886	1.93907	-1.94165	5e-05	0.000952871	yes
ENSGALG00000001483	21:2097420-2103217	con	SY_0.3	134.37	34.7262	-1.95211	5e-05	0.000952871	yes
BCAT1	1:65432215-65472333	con	SY_0.3	56.244	14.5297	-1.9527	5e-05	0.000952871	yes
FKBP5	26:67523-84823	con	SY_0.3	106.223	27.2818	-1.96108	5e-05	0.000952871	yes
ENSGALG00000010653	3:34311458-34422873	con	SY_0.3	4.16612	1.06934	-1.96198	5e-05	0.000952871	yes
ENSGALG00000030712	AADN04000776.1:10-7373	con	SY_0.3	41.2774	10.5644	-1.96614	5e-05	0.000952871	yes
SPSB4	9:6576885-6663551	con	SY_0.3	11.2984	2.88555	-1.9692	5e-05	0.000952871	yes
CHRD	9:15979704-15988790	con	SY_0.3	77.8354	19.7283	-1.98016	5e-05	0.000952871	yes
SLC6A11	12:4050551-4133425	con	SY_0.3	1.14947	0.285731	-2.00824	0.00085	0.0105818	yes
SEBOX	19:5638402-5639026	con	SY_0.3	355.64	88.24	-2.01091	5e-05	0.000952871	yes
ENSGALG00000033420	AADN04000745.1:20-5551	con	SY_0.3	17.9809	4.44104	-2.0175	5e-05	0.000952871	yes
SLC6A13	1:60262381-60287559	con	SY_0.3	1.27282	0.312269	-2.02717	0.001	0.0119675	yes
MOGAT1	9:8038069-8049501	con	SY_0.3	4.84435	1.18836	-2.02733	0.0006	0.00791872	yes
ENSGALG00000008681	17:2234851-2252988	con	SY_0.3	50.1483	12.2576	-2.03253	5e-05	0.000952871	yes
ENSGALG00000043817	1:75880171-75881531	con	SY_0.3	64.1255	15.6724	-2.03267	5e-05	0.000952871	yes
GMNN	2:90523232-90528650	con	SY_0.3	87.4736	21.284	-2.03908	5e-05	0.000952871	yes
YPEL1	15:555263-562933	con	SY_0.3	85.6461	20.8157	-2.04072	5e-05	0.000952871	yes
BCAS1	20:12593354-12627734	con	SY_0.3	10.553	2.54254	-2.05331	5e-05	0.000952871	yes
ENSGALG00000034695	17:2371746-2378780	con	SY_0.3	10.8562	2.61317	-2.05465	5e-05	0.000952871	yes
CSRP2	1:38237619-38245641	con	SY_0.3	387.888	91.4898	-2.08396	5e-05	0.000952871	yes
ENSGALG00000029456	4:84503284-84508288	con	SY_0.3	58.7662	13.8422	-2.08591	5e-05	0.000952871	yes
STAT1	7:7920233-7940268	con	SY_0.3	151.764	35.4416	-2.09831	5e-05	0.000952871	yes
SYT12	5:1444686-1451053	con	SY_0.3	4.28001	0.995898	-2.10354	5e-05	0.000952871	yes
CYP7A1	2:112384149-112391681	con	SY_0.3	6.76802	1.57393	-2.10437	5e-05	0.000952871	yes
ENSGALG00000026768	Z:50223339-50282675	con	SY_0.3	4.88238	1.1248	-2.11792	5e-05	0.000952871	yes
PSAT1	Z:37963279-37978569	con	SY_0.3	19.6296	4.51994	-2.11866	5e-05	0.000952871	yes
ENSGALG00000036108	21:2080808-2096566	con	SY_0.3	154.159	35.4953	-2.11872	5e-05	0.000952871	yes
ENSGALG00000020554	Z:33379223-33557131	con	SY_0.3	26.4959	6.06449	-2.12731	5e-05	0.000952871	yes
FRMPD4	1:123533141-123555601	con	SY_0.3	5.97916	1.36256	-2.13363	5e-05	0.000952871	yes
STK32A	13:18066210-18085473	con	SY_0.3	4.93787	1.10792	-2.15604	5e-05	0.000952871	yes
ENSGALG00000034065	4:84509163-84512376	con	SY_0.3	77.8578	17.3733	-2.16397	5e-05	0.000952871	yes
NPY	2:31520569-31529071	con	SY_0.3	242.489	52.935	-2.19563	5e-05	0.000952871	yes
TCERG1L	6:34626203-34707794	con	SY_0.3	112.238	24.3431	-2.20497	5e-05	0.000952871	yes
SNAP91	3:77916879-77987344	con	SY_0.3	36.7561	7.96541	-2.20616	5e-05	0.000952871	yes
ENSGALG00000041965	1:644121-644826	con	SY_0.3	268.074	57.698	-2.21604	5e-05	0.000952871	yes
NTM	24:1863779-2108022	con	SY_0.3	10.9239	2.31205	-2.24024	5e-05	0.000952871	yes
ETV7	26:1529163-1533184	con	SY_0.3	1.07207	0.226622	-2.24204	0.00115	0.0134088	yes
ENSGALG00000041161	22:4596585-4606473	con	SY_0.3	401.37	84.7752	-2.24322	5e-05	0.000952871	yes
EMB	Z:14736700-14761276	con	SY_0.3	155.495	32.7842	-2.24579	5e-05	0.000952871	yes
ENSGALG00000006944	12:11681381-11694792	con	SY_0.3	9.34747	1.95444	-2.25782	0.0054	0.0448856	yes
ISM1	3:12714884-12753773	con	SY_0.3	15.0472	3.1352	-2.26287	5e-05	0.000952871	yes
NRXN3	5:39613133-39992277	con	SY_0.3	1.2857	0.265962	-2.27327	5e-05	0.000952871	yes
SLBP	4:84514572-84521325	con	SY_0.3	4.56903	0.943598	-2.27564	5e-05	0.000952871	yes
MCHR2	14:14407360-14411064	con	SY_0.3	6.16845	1.26843	-2.28187	0.0001	0.00176485	yes
BMPR1B	4:58732963-58968719	con	SY_0.3	5.54918	1.12297	-2.30496	5e-05	0.000952871	yes
GLIS3	Z:26854032-26967182	con	SY_0.3	0.638536	0.127048	-2.3294	0.00415	0.0370046	yes
IP6K3	26:4605012-4612987	con	SY_0.3	1.32802	0.263572	-2.33301	0.0012	0.0138376	yes
REEP1	4:86105020-86142977	con	SY_0.3	11.2435	2.22021	-2.34033	5e-05	0.000952871	yes
SOSTDC1	2:28464104-28467890	con	SY_0.3	33.2658	6.53566	-2.34763	5e-05	0.000952871	yes
ENSGALG00000037194	3:102165196-102197992	con	SY_0.3	0.793889	0.15527	-2.35416	0.0009	0.0110626	yes
ATP6V0A4	1:56383283-56408305	con	SY_0.3	225.929	43.9941	-2.36049	5e-05	0.000952871	yes
ENSGALG00000015263	1:84584802-84592547	con	SY_0.3	17.1238	3.32364	-2.36517	5e-05	0.000952871	yes
Sial-T2	1:66641207-66757539	con	SY_0.3	51.2204	9.90815	-2.37003	5e-05	0.000952871	yes
ENSGALG00000017032	1:170511178-170526983	con	SY_0.3	77.9719	14.7593	-2.40133	5e-05	0.000952871	yes
KL	1:174247035-174291621	con	SY_0.3	11.908	2.24628	-2.40632	5e-05	0.000952871	yes
ENSGALG00000008759	9:16420967-16432613	con	SY_0.3	118.174	22.2733	-2.40752	5e-05	0.000952871	yes
RNF144B	2:60441861-60473502	con	SY_0.3	7.22898	1.3564	-2.41401	5e-05	0.000952871	yes
CD83	2:60893103-60904213	con	SY_0.3	29.0065	5.38625	-2.42902	5e-05	0.000952871	yes
ENSGALG00000006728	15:8813667-8842734	con	SY_0.3	3.58074	0.662232	-2.43485	5e-05	0.000952871	yes
ENSGALG00000028602	13:9493413-9530196	con	SY_0.3	7.88208	1.45306	-2.43948	5e-05	0.000952871	yes
ENSGALG00000000568	26:423512-463485	con	SY_0.3	4.44692	0.816675	-2.44497	0.0002	0.0031755	yes
FGB	4:20472455-20478595	con	SY_0.3	303.6	55.6535	-2.44763	5e-05	0.000952871	yes
COTL1	11:17047245-17065341	con	SY_0.3	675.166	122.664	-2.46053	5e-05	0.000952871	yes
ENSGALG00000041977	4:17396690-17432723	con	SY_0.3	281.7	50.5687	-2.47784	5e-05	0.000952871	yes
NOV	2:136568797-136574085	con	SY_0.3	9.90103	1.75932	-2.49256	5e-05	0.000952871	yes
SLC12A2	Z:56691801-56743665	con	SY_0.3	110.053	19.4368	-2.50134	5e-05	0.000952871	yes
FN1	7:4390374-4439659	con	SY_0.3	414.375	72.6321	-2.51226	0.0039	0.0351905	yes
ENSGALG00000013057	1:62144163-62154171	con	SY_0.3	41.2613	7.20517	-2.51769	5e-05	0.000952871	yes
ENSGALG00000041739	AADN04024149.1:777-5231	con	SY_0.3	4.32033	0.754047	-2.51842	5e-05	0.000952871	yes
ENSGALG00000039258	AADN04003156.1:6805-8016	con	SY_0.3	2.79913	0.482489	-2.53641	0.0005	0.0067967	yes
ENSGALG00000028982	3:95396265-95400963	con	SY_0.3	33.8035	5.7294	-2.56072	5e-05	0.000952871	yes
ENSGALG00000045085	6:19356960-19360731	con	SY_0.3	29.6151	4.95493	-2.5794	5e-05	0.000952871	yes
GRM8	1:20929340-21246163	con	SY_0.3	3.19229	0.52212	-2.61214	5e-05	0.000952871	yes
TBX22	4:1519494-1524660	con	SY_0.3	1.34014	0.218551	-2.61633	5e-05	0.000952871	yes
CAPN6	4:13384417-13431218	con	SY_0.3	2.28533	0.370933	-2.62317	5e-05	0.000952871	yes
RSAD2	3:95406460-95415464	con	SY_0.3	4.19263	0.674548	-2.63586	5e-05	0.000952871	yes
ENSGALG00000021304	Z:11028677-11040410	con	SY_0.3	3.50518	0.536828	-2.70695	0.00265	0.0263201	yes
ENSGALG00000012593	Z:40166143-40179451	con	SY_0.3	65.7812	10.0548	-2.70979	5e-05	0.000952871	yes
NXPH2	7:31593373-31624071	con	SY_0.3	3.39186	0.516487	-2.71527	5e-05	0.000952871	yes
ENSGALG00000001035	28:2204643-2216483	con	SY_0.3	11.369	1.72095	-2.72383	5e-05	0.000952871	yes
PDE8B	Z:23210325-23284124	con	SY_0.3	1.8694	0.271533	-2.78337	5e-05	0.000952871	yes
GRIN2A	14:9303506-9451731	con	SY_0.3	0.690418	0.0993267	-2.79722	5e-05	0.000952871	yes
ENSGALG00000008888	4:16915774-17249012	con	SY_0.3	3.58393	0.508094	-2.81838	5e-05	0.000952871	yes
GLDN	10:9240918-9255900	con	SY_0.3	1.39489	0.195022	-2.83844	5e-05	0.000952871	yes
COL19A1	3:83179141-83351003	con	SY_0.3	0.738238	0.0957497	-2.94675	0.00015	0.00251361	yes
OASL	12:3226394-3228407	con	SY_0.3	108.481	13.8404	-2.97048	5e-05	0.000952871	yes
FGF14	1:143252844-143354891	con	SY_0.3	4.3862	0.559011	-2.97202	5e-05	0.000952871	yes
ENSGALG00000013575	2:90026992-90030445	con	SY_0.3	143.046	18.1657	-2.97719	5e-05	0.000952871	yes
ENSGALG00000016142	1:108921072-108942022	con	SY_0.3	30.2958	3.76073	-3.01003	5e-05	0.000952871	yes
ENSGALG00000011727	1:47965221-47968879	con	SY_0.3	1.23727	0.148177	-3.06176	0.00595	0.0481915	yes
TNC	17:3145479-3214636	con	SY_0.3	31.7239	3.78696	-3.06646	5e-05	0.000952871	yes
ENSGALG00000019276	1:65220691-65266821	con	SY_0.3	40.0561	4.52376	-3.14643	5e-05	0.000952871	yes
PLA2G4F	5:25553602-25573229	con	SY_0.3	3.7867	0.417283	-3.18184	5e-05	0.000952871	yes
TMC3	10:12084066-12101401	con	SY_0.3	3.04659	0.3302	-3.20578	5e-05	0.000952871	yes
ENPEP	4:58197815-58231230	con	SY_0.3	11.5066	1.1579	-3.31288	5e-05	0.000952871	yes
ENSGALG00000034899	2:113829128-113995963	con	SY_0.3	0.637785	0.063518	-3.32783	0.0023	0.0235841	yes
ENSGALG00000020575	7:36400377-36402792	con	SY_0.3	3.19853	0.298028	-3.42389	0.0011	0.0129032	yes
ELOVL3	6:16800939-16805324	con	SY_0.3	5.95324	0.542223	-3.45672	5e-05	0.000952871	yes
ENSGALG00000044800	KQ759531.1:6338-38837	con	SY_0.3	30.6057	2.61425	-3.54933	5e-05	0.000952871	yes
SLCO5A1	2:116787852-116850398	con	SY_0.3	3.25611	0.278055	-3.5497	5e-05	0.000952871	yes
RORB	Z:36543162-36676401	con	SY_0.3	1.94503	0.158126	-3.62065	5e-05	0.000952871	yes
AKR1D1	1:56602261-56640860	con	SY_0.3	56.4893	4.58616	-3.62262	5e-05	0.000952871	yes
PER2	9:5502474-5526782	con	SY_0.3	113.71	7.61768	-3.89986	5e-05	0.000952871	yes
UTS2B	9:13751028-13757813	con	SY_0.3	2.13166	0.132982	-4.00267	0.0039	0.0351905	yes
ENSGALG00000038140	4:25162883-25180520	con	SY_0.3	7.82636	0.486221	-4.00866	5e-05	0.000952871	yes
PIWIL1	15:3348419-3365105	con	SY_0.3	5.98216	0.338719	-4.14251	5e-05	0.000952871	yes
CHST4	11:20098882-20100019	con	SY_0.3	14.1679	0.666542	-4.40979	5e-05	0.000952871	yes
DPYS	2:130564106-130592497	con	SY_0.3	15.741	0.732254	-4.42604	5e-05	0.000952871	yes
SLC34A2	4:73916378-73933539	con	SY_0.3	376.436	17.207	-4.45134	5e-05	0.000952871	yes
TMEM132D	15:3525978-3717176	con	SY_0.3	0.971923	0.0430483	-4.49681	0.0001	0.00176485	yes
THSD7B	7:31073811-31346787	con	SY_0.3	10.2557	0.45283	-4.50131	5e-05	0.000952871	yes
ENSGALG00000009639	4:25181858-25200923	con	SY_0.3	5.09546	0.163769	-4.95947	5e-05	0.000952871	yes
ENSGALG00000009877	3:22357076-22527887	con	SY_0.3	5.03719	0.160409	-4.97279	5e-05	0.000952871	yes
FOXI3	4:86624886-86627842	con	SY_0.3	4.16797	0.129743	-5.00561	0.0055	0.0456054	yes
ENSGALG00000029827	14:14424333-14476592	con	SY_0.3	0.613269	0.0128471	-5.57701	0.0008	0.0100328	yes
ENSGALG00000016483	3:102109980-102119802	con	SY_0.3	8.5788	0.0903645	-6.56888	0.00495	0.0420967	yes
ENSGALG00000036980	AADN04001113.1:24490-25275	con	SY_0.3	0.920085	0.0001	-13.1676	5e-05	0.000952871	yes
ENSGALG00000043391	2:60484417-60487886	con	SY_0.3	6.86691	0.0001	-16.0674	5e-05	0.000952871	yes

## Sheet: SD vs SY0.45
gene	locus	sample_1	sample_2	value_1	value_2	log2(fold_change)	p_value	q_value	significant
ENSGALG00000040052	AADN04023611.1:20-488	con	SY_0.45	0.0001	2.45182	14.5816	0.0002	0.00339495	yes
ENSGALG00000015134	1:83204421-83207367	con	SY_0.45	0.0001	1.90547	14.2179	5e-05	0.00100478	yes
ENSGALG00000046471	AADN04010536.1:2042-5708	con	SY_0.45	0.0001	0.766286	12.9037	0.0025	0.0285072	yes
GAL3ST2	9:4749642-4754097	con	SY_0.45	0.32613	124.352	8.57477	5e-05	0.00100478	yes
ENSGALG00000012869	2:67948050-67955623	con	SY_0.45	0.105559	7.10496	6.07271	0.00025	0.00413407	yes
ENSGALG00000040355	2:115687084-115692586	con	SY_0.45	12.2733	687.299	5.80734	5e-05	0.00100478	yes
EREG	4:45042455-45050324	con	SY_0.45	0.382682	17.95	5.5517	5e-05	0.00100478	yes
gallin_2	3:107578250-107578746	con	SY_0.45	25.4096	921.977	5.18128	5e-05	0.00100478	yes
AREG	4:45060435-45066903	con	SY_0.45	0.542389	17.0743	4.97635	5e-05	0.00100478	yes
FGF1	13:17348658-17363069	con	SY_0.45	6.21368	191.502	4.94577	5e-05	0.00100478	yes
FOS	5:38264803-38267713	con	SY_0.45	11.4091	279.24	4.61325	5e-05	0.00100478	yes
ENSGALG00000021274	17:1423994-1430435	con	SY_0.45	0.245059	3.99629	4.02746	5e-05	0.00100478	yes
NR4A3	2:89674439-89694916	con	SY_0.45	3.58869	53.3779	3.89472	5e-05	0.00100478	yes
TSKU	1:193483507-193498274	con	SY_0.45	5.56845	77.8627	3.80558	5e-05	0.00100478	yes
GNG4	3:38148553-38161698	con	SY_0.45	1.33102	17.424	3.71047	5e-05	0.00100478	yes
CEMIP	10:12248441-12295841	con	SY_0.45	0.216895	2.45843	3.50267	5e-05	0.00100478	yes
DRD4	5:520311-526176	con	SY_0.45	1.84	19.9345	3.43749	5e-05	0.00100478	yes
C15orf59	10:2199546-2206730	con	SY_0.45	1.59734	16.8118	3.39573	5e-05	0.00100478	yes
DUSP4	4:49691810-49696013	con	SY_0.45	0.344806	3.42149	3.31076	0.00015	0.00264299	yes
PRKG2	4:45935472-45954816	con	SY_0.45	2.63891	25.7146	3.28458	5e-05	0.00100478	yes
T	3:43074401-43082303	con	SY_0.45	0.801967	7.6603	3.25578	5e-05	0.00100478	yes
NR4A1	AADN04001839.1:12961-19403	con	SY_0.45	3.23679	30.6175	3.24172	5e-05	0.00100478	yes
B3GNT7	9:15318556-15320500	con	SY_0.45	3.39463	31.9165	3.23298	5e-05	0.00100478	yes
ENSGALG00000033066	3:88645827-88654505	con	SY_0.45	1.03551	9.72218	3.23094	0.00155	0.0193664	yes
TC2N	5:44480200-44495004	con	SY_0.45	6.60649	61.7797	3.22518	5e-05	0.00100478	yes
CACNG5	18:7370024-7381626	con	SY_0.45	0.343312	3.0888	3.16945	5e-05	0.00100478	yes
SLC6A17	26:1342525-1349149	con	SY_0.45	0.370618	3.29871	3.15389	5e-05	0.00100478	yes
PENK	2:111735939-111739272	con	SY_0.45	23.601	200.568	3.08717	5e-05	0.00100478	yes
NR4A2	7:36220883-36228064	con	SY_0.45	1.38628	11.6176	3.06702	5e-05	0.00100478	yes
ENSGALG00000016165	1:109383705-109388083	con	SY_0.45	11.3064	91.9748	3.0241	5e-05	0.00100478	yes
ATF3	3:21874341-21876244	con	SY_0.45	11.105	89.5062	3.01078	5e-05	0.00100478	yes
SLC5A9	8:22688087-22754261	con	SY_0.45	2.44039	19.438	2.99369	0.00015	0.00264299	yes
ENSGALG00000025996	6:33407190-33426169	con	SY_0.45	0.236915	1.8781	2.98684	5e-05	0.00100478	yes
ENSGALG00000014900	3:63404965-63414848	con	SY_0.45	0.263464	2.06778	2.9724	0.00035	0.00554228	yes
ETV4	27:3550455-3562778	con	SY_0.45	2.60785	19.1789	2.87859	5e-05	0.00100478	yes
ENSGALG00000035935	10:8129597-8287922	con	SY_0.45	1.87775	13.4316	2.83855	5e-05	0.00100478	yes
ENSGALG00000008352	10:20173862-20181914	con	SY_0.45	10.1183	72.1443	2.83391	5e-05	0.00100478	yes
PHLDA2	5:13148443-13149910	con	SY_0.45	18.626	131.488	2.81955	5e-05	0.00100478	yes
OTOP2	18:10636189-10650511	con	SY_0.45	25.86	181.652	2.81238	5e-05	0.00100478	yes
GKN2	22:268676-272038	con	SY_0.45	745.573	5060.52	2.76287	5e-05	0.00100478	yes
ENSGALG00000000115	16:189280-190877	con	SY_0.45	11.0443	74.5662	2.75523	5e-05	0.00100478	yes
PLK2	Z:18020073-18025386	con	SY_0.45	8.31275	56.0814	2.75413	5e-05	0.00100478	yes
GRIK1	1:104161062-104236516	con	SY_0.45	1.37907	9.29613	2.75293	5e-05	0.00100478	yes
ENSGALG00000042236	AADN04001811.1:20-20443	con	SY_0.45	1.61228	10.208	2.66252	5e-05	0.00100478	yes
GADL1	2:40023359-40105157	con	SY_0.45	16.1979	101.511	2.64775	5e-05	0.00100478	yes
CTHRC1	2:130013429-130018289	con	SY_0.45	1.30931	8.02792	2.61622	5e-05	0.00100478	yes
TRIM35	3:105797590-105802351	con	SY_0.45	23.0482	138.889	2.59121	5e-05	0.00100478	yes
ENSGALG00000015404	2:111538766-111558006	con	SY_0.45	0.115929	0.69734	2.58863	0.00035	0.00554228	yes
ENSGALG00000044761	KQ759404.1:315979-317695	con	SY_0.45	0.177156	1.04393	2.55892	0.00485	0.0483705	yes
ENSGALG00000003203	12:2634370-2635472	con	SY_0.45	1.51931	8.91894	2.55346	5e-05	0.00100478	yes
ASIC2	27:1939763-2016704	con	SY_0.45	0.733972	4.28925	2.54693	5e-05	0.00100478	yes
Id1	20:10207841-10209004	con	SY_0.45	14.4474	83.1757	2.52535	5e-05	0.00100478	yes
ENSGALG00000013072	1:62496372-62504516	con	SY_0.45	7.53989	43.3547	2.52357	5e-05	0.00100478	yes
ENSGALG00000030720	AADN04000704.1:70101-77227	con	SY_0.45	1.56864	8.98416	2.51787	5e-05	0.00100478	yes
ENSGALG00000023818	27:5258117-5258992	con	SY_0.45	19.4872	110.334	2.50128	5e-05	0.00100478	yes
KCNJ2	18:8259054-8265799	con	SY_0.45	3.12096	17.6128	2.49656	5e-05	0.00100478	yes
ENSGALG00000010169	3:30323970-30326268	con	SY_0.45	0.933703	5.23904	2.48827	5e-05	0.00100478	yes
ENSGALG00000043582	2:148492681-148497873	con	SY_0.45	21.072	117.146	2.47491	5e-05	0.00100478	yes
TRIB2	3:98314007-98334982	con	SY_0.45	7.61861	42.0806	2.46555	5e-05	0.00100478	yes
ENSGALG00000046133	12:2696195-2701876	con	SY_0.45	3.84308	21.1405	2.45968	5e-05	0.00100478	yes
RNF208	17:1464875-1465673	con	SY_0.45	6.69123	36.4664	2.44622	5e-05	0.00100478	yes
ENSGALG00000036145	7:6803174-6803883	con	SY_0.45	30.3677	164.524	2.43769	5e-05	0.00100478	yes
VIPR1	2:1742702-1846900	con	SY_0.45	0.430163	2.32101	2.4318	5e-05	0.00100478	yes
ENSGALG00000042995	26:2211495-2216281	con	SY_0.45	0.440177	2.37127	2.4295	0.0042	0.0431358	yes
ETV5	9:5114527-5123909	con	SY_0.45	6.41335	34.135	2.4121	5e-05	0.00100478	yes
BPIFB2	20:10498384-10503032	con	SY_0.45	1.11378	5.92378	2.41105	5e-05	0.00100478	yes
TBXAS1	1:55806773-56041222	con	SY_0.45	1.829	9.62138	2.39519	5e-05	0.00100478	yes
WNT11	1:193938734-193964975	con	SY_0.45	2.58506	13.5144	2.38622	5e-05	0.00100478	yes
Pit1W	1:92852809-92868421	con	SY_0.45	0.33235	1.73181	2.3815	5e-05	0.00100478	yes
CHGA	5:44953315-44963482	con	SY_0.45	0.745371	3.82241	2.35845	5e-05	0.00100478	yes
RHOBTB3	Z:57359527-57387760	con	SY_0.45	0.647062	3.31575	2.35736	5e-05	0.00100478	yes
SYT8	5:14108058-14112076	con	SY_0.45	8.68238	44.2836	2.35061	5e-05	0.00100478	yes
ENSGALG00000024136	25:1069828-1071422	con	SY_0.45	10.4645	53.3241	2.34929	5e-05	0.00100478	yes
MAP3K15	1:120215623-120287272	con	SY_0.45	2.58922	13.0182	2.32995	5e-05	0.00100478	yes
ENSGALG00000033433	5:49376781-49378262	con	SY_0.45	0.570814	2.86859	2.32925	0.0001	0.00186982	yes
ENSGALG00000008896	7:14159349-14200241	con	SY_0.45	0.270759	1.35765	2.32603	0.00325	0.0350666	yes
ENSGALG00000035155	AADN04012245.1:5949-7351	con	SY_0.45	2.20902	10.8756	2.29962	5e-05	0.00100478	yes
BTC	4:34879239-34884609	con	SY_0.45	1.19188	5.79623	2.28188	5e-05	0.00100478	yes
RXRG	8:5154110-5168109	con	SY_0.45	5.973	28.7756	2.26832	5e-05	0.00100478	yes
ENSGALG00000011281	2:36030780-36036088	con	SY_0.45	16.6006	79.1579	2.2535	5e-05	0.00100478	yes
ENSGALG00000003644	10:4364154-4365882	con	SY_0.45	6.5151	30.8932	2.24543	5e-05	0.00100478	yes
ENSGALG00000042870	1:32603424-32604254	con	SY_0.45	44.4705	208.767	2.23097	5e-05	0.00100478	yes
RGS1	8:3620500-3624059	con	SY_0.45	0.203842	0.956366	2.23011	0.00345	0.036811	yes
ENSGALG00000008932	17:1407212-1416410	con	SY_0.45	11.6652	54.5873	2.22635	5e-05	0.00100478	yes
ENSGALG00000012382	7:31731613-31814126	con	SY_0.45	0.605133	2.82919	2.22507	5e-05	0.00100478	yes
DUSP1	13:9052098-9054704	con	SY_0.45	90.2651	419.443	2.21624	5e-05	0.00100478	yes
STC2	13:9230033-9239581	con	SY_0.45	10.7832	50.0197	2.21372	5e-05	0.00100478	yes
ENSGALG00000010268	4:34869459-34877868	con	SY_0.45	30.0959	136.832	2.18477	5e-05	0.00100478	yes
ANKRD9	5:49728730-49729609	con	SY_0.45	3.45087	15.5047	2.16767	5e-05	0.00100478	yes
EGR1	13:18348954-18351756	con	SY_0.45	10.4539	46.9544	2.16722	5e-05	0.00100478	yes
CDHR1	6:3035223-3068706	con	SY_0.45	0.314193	1.41	2.16598	5e-05	0.00100478	yes
PTHLH	1:72518737-72529849	con	SY_0.45	0.938539	4.11364	2.13193	0.0001	0.00186982	yes
RGS7	3:36010697-36240970	con	SY_0.45	0.877999	3.78564	2.10824	5e-05	0.00100478	yes
IGFBP1	2:55087643-55093886	con	SY_0.45	1.4954	6.39115	2.09554	5e-05	0.00100478	yes
ENSGALG00000038715	14:14262436-14262808	con	SY_0.45	6.21143	26.5088	2.09347	0.0025	0.0285072	yes
ENSGALG00000035572	AADN04017182.1:40-4577	con	SY_0.45	0.246472	1.05089	2.09212	0.0001	0.00186982	yes
ENSGALG00000032327	7:31820105-31850405	con	SY_0.45	0.57162	2.429	2.08723	0.0004	0.0062097	yes
ENSGALG00000045878	12:2903111-2908468	con	SY_0.45	2.85006	11.9986	2.0738	5e-05	0.00100478	yes
ENSGALG00000010926	4:45974554-45977750	con	SY_0.45	136.563	570.55	2.06279	5e-05	0.00100478	yes
ENSGALG00000033586	AADN04006626.1:20-5521	con	SY_0.45	13.0452	53.7826	2.04362	5e-05	0.00100478	yes
PDE4C	28:3997168-4005304	con	SY_0.45	0.484644	1.99601	2.04212	5e-05	0.00100478	yes
ENSGALG00000030635	7:7918156-7919078	con	SY_0.45	4.96729	20.3034	2.03119	5e-05	0.00100478	yes
NFKBIZ	1:85395265-85411616	con	SY_0.45	3.21786	13.0948	2.02482	5e-05	0.00100478	yes
ENSGALG00000043903	AADN04000704.1:31648-32962	con	SY_0.45	3.65455	14.7638	2.0143	5e-05	0.00100478	yes
ENSGALG00000040904	AADN04012242.1:1935-6199	con	SY_0.45	1.41041	5.62546	1.99585	5e-05	0.00100478	yes
ENSGALG00000008881	17:1861275-1913128	con	SY_0.45	58.7863	233.826	1.99189	5e-05	0.00100478	yes
EAF2	7:26469582-26482932	con	SY_0.45	14.0442	55.8541	1.99168	5e-05	0.00100478	yes
ADAMTS18	11:13995377-14063388	con	SY_0.45	0.167916	0.667512	1.99106	0.0005	0.00750223	yes
SGK1	3:56365720-56371288	con	SY_0.45	98.4837	390.917	1.9889	5e-05	0.00100478	yes
WNT5B	1:60973500-60989342	con	SY_0.45	6.48508	25.7331	1.98843	5e-05	0.00100478	yes
ENSGALG00000043210	AADN04012245.1:4096-4677	con	SY_0.45	144.718	562.566	1.95878	5e-05	0.00100478	yes
REG4	8:4258297-4259712	con	SY_0.45	1.52366	5.90805	1.95514	0.00285	0.0316134	yes
ENSGALG00000041855	AADN04003965.1:9757-13044	con	SY_0.45	4.75437	18.341	1.94775	5e-05	0.00100478	yes
RUBCNL	1:168099690-168119251	con	SY_0.45	12.6497	48.1494	1.92841	5e-05	0.00100478	yes
TNS4	27:4872137-4879191	con	SY_0.45	7.3943	28.0937	1.92576	5e-05	0.00100478	yes
NOX4	1:187793323-187896831	con	SY_0.45	0.589012	2.21631	1.91179	5e-05	0.00100478	yes
NIPAL1	4:66993586-66998001	con	SY_0.45	3.99837	14.9939	1.90689	5e-05	0.00100478	yes
ENSGALG00000002558	19:4932051-4939807	con	SY_0.45	0.39704	1.47408	1.89246	5e-05	0.00100478	yes
SLC7A11	4:29140500-29195218	con	SY_0.45	0.452589	1.67683	1.88946	0.00215	0.0251344	yes
C8orf4	22:2509376-2510527	con	SY_0.45	39.8008	147.353	1.88841	5e-05	0.00100478	yes
ENSGALG00000043026	AADN04000704.1:45427-51696	con	SY_0.45	3.61215	13.3444	1.88531	5e-05	0.00100478	yes
ENSGALG00000046548	1:83108717-83116269	con	SY_0.45	1.14092	4.20027	1.88029	0.0012	0.0156174	yes
HTR1E	3:76904837-76905953	con	SY_0.45	1.16197	4.2484	1.87035	5e-05	0.00100478	yes
CARHSP1	14:10077020-10104332	con	SY_0.45	29.9637	109.509	1.86976	5e-05	0.00100478	yes
ENSGALG00000037851	13:16816437-16818397	con	SY_0.45	1.0053	3.63964	1.85618	0.0025	0.0285072	yes
KLF4	Z:55703410-55706995	con	SY_0.45	9.57968	34.5097	1.84895	5e-05	0.00100478	yes
ENSGALG00000042435	AADN04005436.1:10936-13423	con	SY_0.45	50.8379	182.289	1.84225	5e-05	0.00100478	yes
ENSGALG00000042660	AADN04004671.1:7070-7764	con	SY_0.45	2.64321	9.46976	1.84104	0.0014	0.0177562	yes
ATP13A5	9:13147007-13173536	con	SY_0.45	59.2561	211.85	1.83801	5e-05	0.00100478	yes
ITM2C	9:5386984-5403209	con	SY_0.45	21.6497	76.9976	1.83047	5e-05	0.00100478	yes
ENSGALG00000037976	AADN04003021.1:11214-18050	con	SY_0.45	41.2079	146.419	1.82911	5e-05	0.00100478	yes
OXTR	12:19319351-19323273	con	SY_0.45	0.492348	1.74672	1.8269	0.00175	0.0213494	yes
DUSP8	5:14163586-14184836	con	SY_0.45	7.48533	26.4686	1.82214	5e-05	0.00100478	yes
CPZ	4:81756779-81791318	con	SY_0.45	2.85547	10.0093	1.80954	5e-05	0.00100478	yes
ENSGALG00000043546	AADN04006481.1:2043-7252	con	SY_0.45	143.819	502.187	1.80396	5e-05	0.00100478	yes
ENSGALG00000030736	AADN04001085.1:2448-12591	con	SY_0.45	105.238	365.706	1.79702	5e-05	0.00100478	yes
ENSGALG00000020982	20:10511916-10517297	con	SY_0.45	4.55398	15.7622	1.79127	5e-05	0.00100478	yes
WIF1	1:33881873-33923658	con	SY_0.45	6.32221	21.6936	1.77877	5e-05	0.00100478	yes
SIAT9	4:85969309-85990133	con	SY_0.45	40.4341	136.439	1.75462	5e-05	0.00100478	yes
EEPD1	2:46965661-47025197	con	SY_0.45	7.5698	25.483	1.75121	5e-05	0.00100478	yes
FZD1	2:22162540-22164687	con	SY_0.45	25.0211	84.1561	1.74992	5e-05	0.00100478	yes
JUND	28:3991325-3992297	con	SY_0.45	54.6389	183.379	1.74683	5e-05	0.00100478	yes
THBS4	Z:22015577-22053824	con	SY_0.45	0.268377	0.89755	1.74173	0.00085	0.0116845	yes
SDC1	3:102005546-102025143	con	SY_0.45	107.638	358.638	1.73635	5e-05	0.00100478	yes
ENSGALG00000011166	5:48265286-48268809	con	SY_0.45	3.16854	10.4832	1.72619	0.0005	0.00750223	yes
FABP3	23:593368-596671	con	SY_0.45	17.3552	57.3657	1.72482	5e-05	0.00100478	yes
ENSGALG00000037444	AADN04005104.1:9078-10192	con	SY_0.45	1.33278	4.37625	1.71526	0.0003	0.00485928	yes
ENSGALG00000036187	AADN04008251.1:2042-3583	con	SY_0.45	0.924522	3.02762	1.7114	0.00115	0.0150835	yes
ATP8B3	28:2286961-2297493	con	SY_0.45	4.46422	14.4223	1.69182	5e-05	0.00100478	yes
ENSGALG00000036033	AADN04003031.1:13691-18004	con	SY_0.45	109.891	354.644	1.69029	5e-05	0.00100478	yes
WNT7A	12:6037840-6069834	con	SY_0.45	2.70531	8.71776	1.68816	5e-05	0.00100478	yes
ACSBG1	10:3686192-3715339	con	SY_0.45	0.402526	1.29584	1.68674	0.0006	0.00877737	yes
ENSGALG00000009458	9:20403470-20563585	con	SY_0.45	2.46727	7.87055	1.67355	5e-05	0.00100478	yes
TMEM45A	1:84910506-84928051	con	SY_0.45	11.8887	37.8318	1.67	5e-05	0.00100478	yes
ENSGALG00000042353	AADN04016363.1:20-2210	con	SY_0.45	1.6302	5.18587	1.66954	5e-05	0.00100478	yes
ENSGALG00000030767	2:111387707-111406662	con	SY_0.45	0.396188	1.25412	1.66242	0.0023	0.0266332	yes
ENSGALG00000007526	4:11347257-11351079	con	SY_0.45	2.79816	8.83664	1.65902	5e-05	0.00100478	yes
FAM102B	8:1214520-1235188	con	SY_0.45	1.63387	5.15406	1.65741	5e-05	0.00100478	yes
ENSGALG00000032910	12:3500783-3501119	con	SY_0.45	68.0215	214.43	1.65644	5e-05	0.00100478	yes
TDRD9	5:50651465-50702881	con	SY_0.45	0.231455	0.727025	1.65128	0.00165	0.0202952	yes
ENSGALG00000039430	AADN04008978.1:6646-9662	con	SY_0.45	1.44485	4.5202	1.64546	5e-05	0.00100478	yes
DPEP1	11:18993603-18997174	con	SY_0.45	0.589882	1.8454	1.64543	0.00225	0.0261218	yes
ENSGALG00000011324	7:22321912-22324930	con	SY_0.45	3.54094	11.0761	1.64524	5e-05	0.00100478	yes
ENSGALG00000040953	AADN04004349.1:13152-15177	con	SY_0.45	12.6874	39.4604	1.63701	5e-05	0.00100478	yes
ALDH1A1	Z:35893998-35947479	con	SY_0.45	0.816737	2.53006	1.63123	0.0001	0.00186982	yes
ENSGALG00000036515	AADN04012538.1:2576-4568	con	SY_0.45	7.93133	24.4914	1.62664	5e-05	0.00100478	yes
MYOM2	3:91089248-91163384	con	SY_0.45	1.45619	4.47125	1.61848	5e-05	0.00100478	yes
ENSGALG00000032940	AADN04012076.1:3432-7475	con	SY_0.45	137.459	421.339	1.61598	5e-05	0.00100478	yes
FXYD2	24:5375782-5377024	con	SY_0.45	30.164	91.2122	1.5964	0.0005	0.00750223	yes
FJX1	5:19185022-19186177	con	SY_0.45	2.84721	8.60953	1.59639	0.00015	0.00264299	yes
SRM	21:4108252-4113303	con	SY_0.45	35.0395	105.874	1.59529	5e-05	0.00100478	yes
ENSGALG00000002097	10:1317806-1319927	con	SY_0.45	1.44836	4.35688	1.58887	0.0022	0.025652	yes
PARD6A	11:655583-659450	con	SY_0.45	0.776193	2.33256	1.58742	0.004	0.0412709	yes
ENSGALG00000030592	17:6086304-6102773	con	SY_0.45	6.01992	17.9893	1.57932	5e-05	0.00100478	yes
ENSGALG00000046524	AADN04020224.1:20-2851	con	SY_0.45	0.869749	2.59862	1.57907	0.001	0.013444	yes
TMEM88	21:2197050-2200663	con	SY_0.45	4.79011	14.3069	1.57858	5e-05	0.00100478	yes
ENSGALG00000045251	24:5494864-5498918	con	SY_0.45	1.38371	4.13238	1.57843	0.0001	0.00186982	yes
ENSGALG00000029844	AADN04001189.1:8798-10450	con	SY_0.45	1.7988	5.36818	1.5774	0.0003	0.00485928	yes
ENSGALG00000028238	6:23565910-23569213	con	SY_0.45	0.806184	2.3945	1.57054	0.00125	0.0161431	yes
ENSGALG00000030751	15:2634712-2636326	con	SY_0.45	2.75095	8.16815	1.57008	5e-05	0.00100478	yes
CDCP2	8:25223274-25226916	con	SY_0.45	3.01343	8.92782	1.5669	5e-05	0.00100478	yes
ENSGALG00000040865	AADN04007074.1:4014-8054	con	SY_0.45	2.26164	6.67612	1.56164	0.00015	0.00264299	yes
SGK3	2:115613449-115669550	con	SY_0.45	34.2816	100.928	1.55782	5e-05	0.00100478	yes
ENSGALG00000032405	AADN04000661.1:61201-67038	con	SY_0.45	0.672137	1.96901	1.55064	0.00045	0.00682822	yes
APELA	4:23934180-23936941	con	SY_0.45	10.7179	31.3324	1.54763	0.00035	0.00554228	yes
ESYT3	7:28438095-28465232	con	SY_0.45	1.93786	5.65686	1.54554	5e-05	0.00100478	yes
ENSGALG00000032116	AADN04009389.1:1578-3929	con	SY_0.45	2.90982	8.42226	1.53328	5e-05	0.00100478	yes
ENSGALG00000038012	AADN04006259.1:3851-6561	con	SY_0.45	2.67354	7.73377	1.53242	5e-05	0.00100478	yes
ABI3BP	1:84985336-85117095	con	SY_0.45	28.663	82.887	1.53196	5e-05	0.00100478	yes
PLPPR4	8:12223291-12251722	con	SY_0.45	3.44813	9.96457	1.53099	5e-05	0.00100478	yes
ENSGALG00000039468	9:22370705-22384584	con	SY_0.45	8.12269	23.4438	1.52918	5e-05	0.00100478	yes
ENSGALG00000034594	21:4107701-4108148	con	SY_0.45	55.7885	160.379	1.52345	5e-05	0.00100478	yes
PTN	1:57724422-57794404	con	SY_0.45	29.3623	83.7259	1.51171	0.0005	0.00750223	yes
ENSGALG00000034566	AADN04001110.1:722-11866	con	SY_0.45	3.84276	10.9548	1.51134	5e-05	0.00100478	yes
LCAT	11:1094449-1100820	con	SY_0.45	4.1993	11.9294	1.5063	5e-05	0.00100478	yes
SLC26A9	26:2323803-2335164	con	SY_0.45	2.38305	6.76848	1.50602	5e-05	0.00100478	yes
PKHD1	3:108086834-108304491	con	SY_0.45	0.243471	0.690947	1.50482	0.0003	0.00485928	yes
ENSGALG00000045979	1:101034872-101074782	con	SY_0.45	285.47	808.316	1.50158	5e-05	0.00100478	yes
GREM1	5:30579486-30580185	con	SY_0.45	3.48809	9.87404	1.5012	0.00195	0.0232822	yes
ENSGALG00000001369	26:3151010-3153878	con	SY_0.45	0.874106	2.47058	1.49897	0.00305	0.0334455	yes
MCOLN2	8:16453749-16476405	con	SY_0.45	0.851608	2.40419	1.49729	5e-05	0.00100478	yes
ENSGALG00000043121	AADN04000661.1:74699-95847	con	SY_0.45	1.71296	4.80506	1.48807	5e-05	0.00100478	yes
MIDN	28:3074462-3086759	con	SY_0.45	11.0113	30.8073	1.48428	5e-05	0.00100478	yes
ENSGALG00000037785	AADN04003456.1:9852-13034	con	SY_0.45	46.8415	130.637	1.47971	5e-05	0.00100478	yes
ENSGALG00000043068	AADN04004822.1:10153-14362	con	SY_0.45	1486.63	4141.61	1.47814	5e-05	0.00100478	yes
ENSGALG00000031149	26:2653655-2657098	con	SY_0.45	9.35195	25.869	1.46788	5e-05	0.00100478	yes
ENSGALG00000044863	28:1517176-1518181	con	SY_0.45	1.88965	5.22449	1.46717	0.00165	0.0202952	yes
ENSGALG00000040226	18:8869721-8871282	con	SY_0.45	5.44574	15.0439	1.46598	5e-05	0.00100478	yes
NDUFAF8	18:9347715-9348299	con	SY_0.45	23.4021	64.4427	1.46138	0.0001	0.00186982	yes
PKD2	4:45959957-45974346	con	SY_0.45	17.5243	48.2493	1.46115	5e-05	0.00100478	yes
ENSGALG00000034870	AADN04005945.1:3807-8508	con	SY_0.45	80.6303	221.633	1.45878	5e-05	0.00100478	yes
BTBD17	18:9214741-9217838	con	SY_0.45	1.04243	2.86149	1.45682	0.0011	0.0145127	yes
NKIRAS1	2:37318199-37327078	con	SY_0.45	3.8942	10.6354	1.44948	5e-05	0.00100478	yes
SDC3	23:439986-458290	con	SY_0.45	7.12559	19.4606	1.44947	5e-05	0.00100478	yes
ENSGALG00000034152	AADN04007387.1:4681-8034	con	SY_0.45	7.62438	20.714	1.44191	5e-05	0.00100478	yes
Zfp36l1	5:28356159-28358209	con	SY_0.45	134.505	364.675	1.43896	5e-05	0.00100478	yes
EGR3	AADN04000931.1:9736-13063	con	SY_0.45	2.69373	7.28811	1.43594	0.00025	0.00413407	yes
HGFAC	4:82506599-82546305	con	SY_0.45	12.9772	35.0766	1.43453	5e-05	0.00100478	yes
NPTN	10:2096925-2160818	con	SY_0.45	251.889	678.499	1.42956	5e-05	0.00100478	yes
WSCD2	15:6524247-6533384	con	SY_0.45	4.8501	13.0569	1.42873	5e-05	0.00100478	yes
ENSGALG00000037255	AADN04013890.1:320-4874	con	SY_0.45	65.8079	175.712	1.41688	5e-05	0.00100478	yes
GPR162	1:77229604-77233181	con	SY_0.45	6.01081	16.0449	1.41649	5e-05	0.00100478	yes
CRTAC1	6:22270052-22279635	con	SY_0.45	0.624924	1.6646	1.41343	0.00295	0.032508	yes
GPC4	4:3791473-3853513	con	SY_0.45	90.2935	239.725	1.40869	5e-05	0.00100478	yes
ENSGALG00000038514	AADN04003593.1:2725-7286	con	SY_0.45	0.281977	0.747424	1.40635	0.00335	0.0359724	yes
TRIB1	2:138969887-138972814	con	SY_0.45	3.47389	9.20069	1.40519	0.00025	0.00413407	yes
NOX5	10:19302362-19308218	con	SY_0.45	0.397474	1.05072	1.40245	0.00365	0.0383065	yes
ENSGALG00000036399	9:8389840-8394431	con	SY_0.45	1.59667	4.21596	1.40079	0.0019	0.0228272	yes
SOX9	18:8866455-8869366	con	SY_0.45	14.8836	39.2288	1.3982	5e-05	0.00100478	yes
MYC	2:139845724-139849615	con	SY_0.45	2.68812	7.07969	1.39709	5e-05	0.00100478	yes
ENSGALG00000029411	AADN04005797.1:5106-12938	con	SY_0.45	16.9008	44.3498	1.39183	5e-05	0.00100478	yes
LAMB3	26:3114634-3124587	con	SY_0.45	1.50735	3.94521	1.38808	5e-05	0.00100478	yes
ITGA11	10:19181612-19214397	con	SY_0.45	1.32216	3.45618	1.38628	5e-05	0.00100478	yes
EGFL6	1:123018707-123059075	con	SY_0.45	1.06515	2.78062	1.38434	0.00135	0.0172523	yes
GFRA3	13:18211397-18219351	con	SY_0.45	1.73647	4.52335	1.38123	0.0011	0.0145127	yes
ARSI	13:13183769-13186780	con	SY_0.45	0.770187	1.99998	1.3767	0.0014	0.0177562	yes
ENSGALG00000008040	15:10972570-10982701	con	SY_0.45	9.13656	23.7223	1.37652	5e-05	0.00100478	yes
TSPAN8	1:36146150-36163273	con	SY_0.45	11.9348	30.9297	1.37382	5e-05	0.00100478	yes
MFSD13A	6:23155413-23168239	con	SY_0.45	14.7458	38.1628	1.37186	5e-05	0.00100478	yes
ATP13A2	21:4407475-4423378	con	SY_0.45	23.5537	60.8954	1.37038	5e-05	0.00100478	yes
ENSGALG00000002046	6:2706649-2717766	con	SY_0.45	16.1739	41.7774	1.36906	5e-05	0.00100478	yes
FBLN7	3:3223263-3229095	con	SY_0.45	1.75466	4.51031	1.36204	0.00015	0.00264299	yes
HS6ST2	4:3612122-3713509	con	SY_0.45	21.5352	55.3261	1.36126	5e-05	0.00100478	yes
RAB37	18:10524514-10529085	con	SY_0.45	2.41452	6.18487	1.35701	0.00105	0.0139903	yes
TP53I11	5:22179396-22220666	con	SY_0.45	9.70707	24.8465	1.35593	5e-05	0.00100478	yes
ENSGALG00000042272	AADN04017336.1:1229-4489	con	SY_0.45	1.50588	3.85101	1.35463	0.00045	0.00682822	yes
ENSGALG00000033026	AADN04006307.1:3567-5043	con	SY_0.45	1468.59	3745.71	1.35081	5e-05	0.00100478	yes
ENSGALG00000005811	12:9077382-9082535	con	SY_0.45	5.3554	13.6316	1.34788	5e-05	0.00100478	yes
AIFM3	15:10092336-10106923	con	SY_0.45	0.525381	1.32942	1.33936	0.00395	0.0408177	yes
ENSGALG00000023950	26:2657651-2663698	con	SY_0.45	20.0889	50.6761	1.3349	5e-05	0.00100478	yes
CCR7	27:4891170-4899901	con	SY_0.45	2.18706	5.5159	1.3346	5e-05	0.00100478	yes
ENSGALG00000031828	AADN04005700.1:20-9254	con	SY_0.45	2.19054	5.50776	1.33018	0.0023	0.0266332	yes
ENSGALG00000003921	20:5248042-5254471	con	SY_0.45	29.3411	73.7616	1.32995	5e-05	0.00100478	yes
ENSGALG00000020679	6:27542959-27567902	con	SY_0.45	0.89646	2.25199	1.32889	0.00075	0.0106137	yes
ENSGALG00000037093	AADN04011698.1:928-2298	con	SY_0.45	39.9198	100.238	1.32826	5e-05	0.00100478	yes
ENSGALG00000039647	KQ759707.1:814-6252	con	SY_0.45	37.3175	93.325	1.32241	5e-05	0.00100478	yes
ENSGALG00000036119	AADN04004278.1:5211-7947	con	SY_0.45	2.63193	6.57827	1.32158	0.0002	0.00339495	yes
GRIP2	12:11033188-11140725	con	SY_0.45	1.67337	4.1746	1.31888	5e-05	0.00100478	yes
CRYBA1	19:5961994-5965823	con	SY_0.45	2.295	5.72386	1.3185	0.00475	0.0475141	yes
TNFSF15	17:3061246-3074511	con	SY_0.45	1.66121	4.13263	1.31483	0.0006	0.00877737	yes
HPGD	4:44051783-44077636	con	SY_0.45	2.2118	5.4974	1.31353	0.0001	0.00186982	yes
ADGRG2	1:120395078-120415594	con	SY_0.45	7.68457	19.099	1.31346	5e-05	0.00100478	yes
GADD45G	Z:43730713-43732242	con	SY_0.45	63.4617	157.054	1.3073	5e-05	0.00100478	yes
ENSGALG00000031183	23:196438-201435	con	SY_0.45	6.16259	15.2466	1.30688	5e-05	0.00100478	yes
SEMA5A	2:78926049-79169210	con	SY_0.45	9.36101	23.133	1.30521	5e-05	0.00100478	yes
CNTFR	Z:8134643-8303354	con	SY_0.45	1.44629	3.56956	1.30339	0.00125	0.0161431	yes
ENSGALG00000037512	AADN04004636.1:5994-9408	con	SY_0.45	1.02055	2.5168	1.30224	0.0001	0.00186982	yes
ENSGALG00000030898	AADN04012696.1:20-6668	con	SY_0.45	0.464827	1.14617	1.30206	0.0017	0.0208529	yes
C12orf45	1:54370468-54374950	con	SY_0.45	26.7989	65.9608	1.29944	5e-05	0.00100478	yes
ENSGALG00000006407	5:13059341-13065622	con	SY_0.45	23.4888	57.7333	1.29743	5e-05	0.00100478	yes
ENSGALG00000001885	19:4149873-4151555	con	SY_0.45	84.908	207.781	1.29109	5e-05	0.00100478	yes
SPRY1	4:53714524-53715490	con	SY_0.45	8.65905	21.1795	1.29039	5e-05	0.00100478	yes
FAM3D	12:11897290-11901425	con	SY_0.45	9.45032	23.1109	1.29014	5e-05	0.00100478	yes
JUN	8:26429534-26708604	con	SY_0.45	98.4474	240.723	1.28995	5e-05	0.00100478	yes
CYR61	8:16258745-16261197	con	SY_0.45	3.96338	9.6717	1.28704	5e-05	0.00100478	yes
DOCK3	12:1967649-2179125	con	SY_0.45	0.622043	1.51627	1.28544	0.0001	0.00186982	yes
ENSGALG00000003137	15:4781350-4792186	con	SY_0.45	18.1287	43.8565	1.27451	5e-05	0.00100478	yes
TOB1	18:10170956-10172858	con	SY_0.45	63.7358	153.811	1.27098	5e-05	0.00100478	yes
SH3RF2	13:17864462-17882839	con	SY_0.45	5.38349	12.882	1.25875	5e-05	0.00100478	yes
ENSGALG00000023542	21:6616877-6622890	con	SY_0.45	7.91949	18.9453	1.25836	0.0001	0.00186982	yes
CLDN10	1:146034758-146094044	con	SY_0.45	371.484	888.35	1.25783	5e-05	0.00100478	yes
TFCP2L1	7:26189843-26218128	con	SY_0.45	85.0272	201.764	1.24667	5e-05	0.00100478	yes
ENSGALG00000031618	AADN04002511.1:12775-14383	con	SY_0.45	12.3642	29.3394	1.24667	5e-05	0.00100478	yes
DLC1	4:64904549-64998990	con	SY_0.45	11.6175	27.5422	1.24534	5e-05	0.00100478	yes
CREM	2:13001321-13032921	con	SY_0.45	79.5995	188.389	1.24288	5e-05	0.00100478	yes
EPHA2	21:4315015-4323502	con	SY_0.45	6.07554	14.3777	1.24275	5e-05	0.00100478	yes
ENSGALG00000027514	1:154063927-154106534	con	SY_0.45	3.56851	8.4372	1.24144	0.00065	0.00942675	yes
PPP1R36	5:52927951-52942898	con	SY_0.45	1.3127	3.10101	1.2402	0.0039	0.0404253	yes
NOTUM	18:5104161-5110492	con	SY_0.45	8.4765	19.996	1.23817	5e-05	0.00100478	yes
LAPTM4B	2:127896685-127957080	con	SY_0.45	50.3339	118.712	1.23786	5e-05	0.00100478	yes
ENSGALG00000006325	12:10728707-10770062	con	SY_0.45	1.21169	2.85352	1.23572	0.0011	0.0145127	yes
ENSGALG00000032637	3:67116257-67116749	con	SY_0.45	139.045	326.863	1.23313	5e-05	0.00100478	yes
GFPT2	13:13929616-13940653	con	SY_0.45	2.62696	6.17476	1.23299	5e-05	0.00100478	yes
B3GNT2	3:9067299-9084370	con	SY_0.45	24.4868	57.549	1.23279	5e-05	0.00100478	yes
ENSGALG00000038056	AADN04021857.1:262-2239	con	SY_0.45	1.69635	3.98511	1.23219	0.0012	0.0156174	yes
SLC41A3	12:10499368-10520263	con	SY_0.45	20.4157	47.8134	1.22774	5e-05	0.00100478	yes
ENSGALG00000009606	6:31447761-31460698	con	SY_0.45	3.43191	8.03676	1.2276	5e-05	0.00100478	yes
NRTN	28:1518380-1532850	con	SY_0.45	1.49591	3.48412	1.21977	0.0004	0.0062097	yes
CERK	1:16132581-16175969	con	SY_0.45	13.6843	31.8233	1.21756	5e-05	0.00100478	yes
ENSGALG00000044818	28:18410-21330	con	SY_0.45	1.12062	2.60361	1.21622	0.0015	0.0188291	yes
ENSGALG00000027534	13:13010725-13018170	con	SY_0.45	70.7093	164.173	1.21525	5e-05	0.00100478	yes
PTGES	17:6141753-6144217	con	SY_0.45	14.4111	33.4176	1.21343	0.00075	0.0106137	yes
ENSGALG00000012277	1:51010582-51013540	con	SY_0.45	5.2545	12.1775	1.2126	5e-05	0.00100478	yes
ENSGALG00000045182	17:1474149-1480217	con	SY_0.45	10.5969	24.5364	1.21129	5e-05	0.00100478	yes
VLDLR	Z:26557584-26572292	con	SY_0.45	13.7339	31.7567	1.20931	5e-05	0.00100478	yes
PLCD1	2:4635396-4683167	con	SY_0.45	6.53589	15.0664	1.20488	5e-05	0.00100478	yes
Sema6B	28:2574359-2580634	con	SY_0.45	1.89345	4.36231	1.20408	0.0001	0.00186982	yes
TNFRSF19	1:177513345-177560920	con	SY_0.45	10.5532	24.3043	1.20354	5e-05	0.00100478	yes
KLF6	2:11799037-11808009	con	SY_0.45	13.1707	30.2788	1.20097	5e-05	0.00100478	yes
ENSGALG00000005374	19:8148608-8155225	con	SY_0.45	25.4269	58.402	1.19966	5e-05	0.00100478	yes
SLC17A9	20:8633022-8647973	con	SY_0.45	1.40904	3.23278	1.19806	0.0004	0.0062097	yes
ETNK1	1:66507343-66533577	con	SY_0.45	29.4657	67.5798	1.19756	5e-05	0.00100478	yes
ENTPD3	2:41324890-41345120	con	SY_0.45	4.00346	9.17018	1.1957	5e-05	0.00100478	yes
ENSGALG00000025738	3:39921767-39926303	con	SY_0.45	47.1758	107.95	1.19424	5e-05	0.00100478	yes
ENSGALG00000042915	AADN04005841.1:6065-8921	con	SY_0.45	4.23271	9.68172	1.19368	0.0007	0.0100328	yes
SEMA3G	12:3114600-3121990	con	SY_0.45	502.991	1149.67	1.19262	0.0002	0.00339495	yes
MLXIP	15:5796665-5813999	con	SY_0.45	11.5433	26.3389	1.19014	5e-05	0.00100478	yes
ST8SIA5	Z:1846494-1875903	con	SY_0.45	10.7574	24.4748	1.18597	5e-05	0.00100478	yes
VEGFD	1:122045081-122076797	con	SY_0.45	4.15547	9.44147	1.184	0.00015	0.00264299	yes
CHST11	1:54437823-54592561	con	SY_0.45	2.2199	5.03923	1.18271	0.00075	0.0106137	yes
FLVCR2	5:38339288-38363624	con	SY_0.45	2.48355	5.63627	1.18234	0.0006	0.00877737	yes
ENSGALG00000033869	AADN04001187.1:177-21486	con	SY_0.45	1.83351	4.16006	1.182	0.0025	0.0285072	yes
ENSGALG00000034519	24:98191-100791	con	SY_0.45	5.8031	13.1566	1.18089	0.0002	0.00339495	yes
B3GNT4	15:5834813-5835917	con	SY_0.45	3.6971	8.38125	1.18077	0.00045	0.00682822	yes
KLF2	28:4398875-4401204	con	SY_0.45	20.5488	46.5818	1.18071	5e-05	0.00100478	yes
ANGPT4	20:10094791-10101201	con	SY_0.45	4.03553	9.12884	1.17767	0.0001	0.00186982	yes
ANO6	1:30540024-30668939	con	SY_0.45	1.11491	2.51738	1.175	0.0001	0.00186982	yes
ENSGALG00000037942	AADN04009310.1:5332-9377	con	SY_0.45	41.085	92.4128	1.16948	5e-05	0.00100478	yes
TMEM123	1:182611333-182628423	con	SY_0.45	17.8853	40.1249	1.16573	5e-05	0.00100478	yes
FAM26E	3:63993332-64012992	con	SY_0.45	29.9929	67.1917	1.16366	5e-05	0.00100478	yes
ENSGALG00000033672	AADN04001431.1:6003-15863	con	SY_0.45	8.66404	19.4007	1.163	5e-05	0.00100478	yes
SERPINB5	2:68016051-68022790	con	SY_0.45	6.95657	15.5474	1.16023	5e-05	0.00100478	yes
BMP7	20:11891442-11932585	con	SY_0.45	9.87703	22.0342	1.1576	5e-05	0.00100478	yes
WNT7B	1:70844239-70935921	con	SY_0.45	1.978	4.40926	1.1565	0.00275	0.0308092	yes
P2RY2	1:195388850-195390862	con	SY_0.45	6.708	14.9468	1.15588	0.0003	0.00485928	yes
ENSGALG00000002461	15:2725943-2728629	con	SY_0.45	9.36057	20.8396	1.15466	0.0001	0.00186982	yes
ENSGALG00000015056	2:103493135-103529171	con	SY_0.45	3.3255	7.39767	1.1535	5e-05	0.00100478	yes
ROBO2	1:96895938-97053385	con	SY_0.45	1.76022	3.91536	1.15339	0.0001	0.00186982	yes
RGS2	8:3575630-3578451	con	SY_0.45	36.3625	80.7258	1.15058	5e-05	0.00100478	yes
C2orf88	7:192382-196571	con	SY_0.45	8.66927	19.1802	1.14563	0.00085	0.0116845	yes
SLC4A11	4:89436575-89527283	con	SY_0.45	1.20338	2.65811	1.1433	0.001	0.013444	yes
ENSGALG00000006608	5:14113197-14118876	con	SY_0.45	4.32499	9.53248	1.14015	5e-05	0.00100478	yes
SLC19A2	1:83652331-83662208	con	SY_0.45	7.11266	15.6741	1.13992	0.0002	0.00339495	yes
GADD45B	28:3324493-3327985	con	SY_0.45	42.2592	92.8768	1.13605	5e-05	0.00100478	yes
ENSGALG00000011450	13:13565094-13570421	con	SY_0.45	8.29455	18.2161	1.13498	0.00055	0.00813443	yes
PGLYRP2	KQ759549.1:40469-46056	con	SY_0.45	6.57071	14.4087	1.13281	0.0001	0.00186982	yes
GDPD2	4:2546261-2553430	con	SY_0.45	6.89339	15.1066	1.1319	5e-05	0.00100478	yes
ENSGALG00000027805	10:2279142-2280927	con	SY_0.45	3.09747	6.76546	1.1271	0.00145	0.0182869	yes
SOD3	4:74158333-74159793	con	SY_0.45	3.89564	8.49571	1.12488	0.00185	0.0223262	yes
PDE10A	3:43375110-43466306	con	SY_0.45	5.92729	12.9231	1.12451	5e-05	0.00100478	yes
ODC1	3:97207232-97215296	con	SY_0.45	30.2616	65.8781	1.12231	5e-05	0.00100478	yes
TFRC	9:14984086-14998385	con	SY_0.45	14.775	31.8567	1.10843	5e-05	0.00100478	yes
BARX2B	24:1345214-1371346	con	SY_0.45	3.96578	8.54779	1.10795	0.0037	0.0387405	yes
SCUBE1	1:68626420-68825405	con	SY_0.45	13.9531	30.0466	1.10661	5e-05	0.00100478	yes
KIF1A	9:4834318-4867054	con	SY_0.45	1.12657	2.41941	1.10272	5e-05	0.00100478	yes
RNF19A	2:129040781-129061227	con	SY_0.45	8.86685	19.0104	1.10029	5e-05	0.00100478	yes
ENSGALG00000038442	1:46016847-46028306	con	SY_0.45	5.5087	11.7989	1.09887	0.00065	0.00942675	yes
RXFP1	4:22025963-22073637	con	SY_0.45	15.8108	33.8303	1.0974	5e-05	0.00100478	yes
SLC7A5	11:18186087-18218511	con	SY_0.45	29.1017	62.2621	1.09725	5e-05	0.00100478	yes
VWA1	21:2171723-2181323	con	SY_0.45	20.1544	43.0259	1.09411	5e-05	0.00100478	yes
ID4	2:59931745-59933580	con	SY_0.45	27.2133	57.6797	1.08375	5e-05	0.00100478	yes
ENSGALG00000011404	4:49592535-49595831	con	SY_0.45	5.79754	12.2715	1.0818	0.0013	0.0167246	yes
SIK2	24:59372-97543	con	SY_0.45	8.88008	18.73	1.07671	5e-05	0.00100478	yes
ENSGALG00000026836	23:4983357-4985730	con	SY_0.45	4.15883	8.7684	1.07614	0.00045	0.00682822	yes
IKBKE	26:2475900-2484810	con	SY_0.45	0.991486	2.09008	1.07589	0.0046	0.0463239	yes
NOXA1	17:1392827-1406063	con	SY_0.45	13.3837	28.1529	1.0728	5e-05	0.00100478	yes
FAM3B	1:108910670-108917505	con	SY_0.45	10.2107	21.4422	1.07037	0.0008	0.0111684	yes
ENSGALG00000021399	18:7977126-7997446	con	SY_0.45	1.10715	2.31757	1.06577	0.00035	0.00554228	yes
ULK1	15:2638996-2708090	con	SY_0.45	10.2012	21.3515	1.0656	5e-05	0.00100478	yes
TGFB1	AADN04001188.1:24390-29927	con	SY_0.45	79.2385	164.603	1.05472	5e-05	0.00100478	yes
ENSGALG00000037189	KQ759541.1:1662-46324	con	SY_0.45	2.29727	4.77083	1.05432	0.0034	0.036393	yes
ADAMTS9	12:13758521-13821336	con	SY_0.45	11.0054	22.8362	1.05311	5e-05	0.00100478	yes
ADAMTS17	10:17119377-17282953	con	SY_0.45	1.70227	3.53138	1.05277	0.00225	0.0261218	yes
GLS	7:7863677-7916149	con	SY_0.45	9.91486	20.5519	1.05161	5e-05	0.00100478	yes
KIFC3	11:527203-534806	con	SY_0.45	9.97882	20.6661	1.05033	5e-05	0.00100478	yes
ENSGALG00000005118	9:8396684-8397791	con	SY_0.45	7.6291	15.7821	1.0487	0.00135	0.0172523	yes
ACSF2	18:10433381-10468658	con	SY_0.45	93.7259	193.021	1.04223	5e-05	0.00100478	yes
PTTG1IP	9:5153143-5158994	con	SY_0.45	15.4323	31.692	1.03816	5e-05	0.00100478	yes
ENSGALG00000029027	14:13113262-13120464	con	SY_0.45	14.5756	29.9304	1.03805	5e-05	0.00100478	yes
PPP2R2B	13:17988209-18056326	con	SY_0.45	13.1245	26.938	1.03738	5e-05	0.00100478	yes
KCNJ16	18:8243077-8244367	con	SY_0.45	73.1586	150.109	1.03691	5e-05	0.00100478	yes
ENSGALG00000042020	4:50050412-50052876	con	SY_0.45	33.1148	67.9313	1.0366	0.00015	0.00264299	yes
ENSGALG00000039041	AADN04006422.1:8197-10073	con	SY_0.45	3.16966	6.48648	1.03311	0.0021	0.024787	yes
DUSP6	1:43288466-43292808	con	SY_0.45	9.74956	19.9344	1.03185	5e-05	0.00100478	yes
ENSGALG00000037019	AADN04014437.1:2166-6059	con	SY_0.45	1.48316	3.02939	1.03036	0.00385	0.0400615	yes
LNX1	4:66070909-66131999	con	SY_0.45	3.68158	7.50065	1.02669	0.00015	0.00264299	yes
PIK3AP1	6:16723977-16765056	con	SY_0.45	13.6035	27.7083	1.02634	5e-05	0.00100478	yes
SCARA3	3:105632651-105635951	con	SY_0.45	7.71122	15.6246	1.01879	0.00025	0.00413407	yes
ENSGALG00000035362	21:4390404-4404128	con	SY_0.45	7.33134	14.8487	1.01819	5e-05	0.00100478	yes
GRIP1	1:34431193-34578266	con	SY_0.45	0.600059	1.21462	1.01733	0.00355	0.0375501	yes
TUBA1C	33:595512-599188	con	SY_0.45	3.47426	7.03199	1.01723	0.00215	0.0251344	yes
HTRA1	6:31306159-31333188	con	SY_0.45	15.0904	30.5011	1.01523	5e-05	0.00100478	yes
RHBG	25:1490888-1495432	con	SY_0.45	8.34005	16.8487	1.01451	5e-05	0.00100478	yes
FILIP1L	1:84737374-84814326	con	SY_0.45	13.904	28.0715	1.0136	5e-05	0.00100478	yes
SOX4	2:59096906-59098672	con	SY_0.45	11.0633	22.3027	1.01144	0.00015	0.00264299	yes
TIAM2	3:50653162-50765171	con	SY_0.45	4.95538	9.95763	1.00681	0.00015	0.00264299	yes
CA2	2:123391256-123408736	con	SY_0.45	133.276	267.503	1.00513	5e-05	0.00100478	yes
AFAP1L2	6:27778780-27799753	con	SY_0.45	4.24115	8.50911	1.00455	5e-05	0.00100478	yes
ENSGALG00000005964	4:3087983-3093028	con	SY_0.45	6.90467	13.8516	1.00441	0.0002	0.00339495	yes
NOCT	4:29428816-29433345	con	SY_0.45	9.71438	19.4713	1.00315	0.0001	0.00186982	yes
ENSGALG00000006469	24:2848178-2865777	con	SY_0.45	5.88091	11.7846	1.0028	0.0001	0.00186982	yes
ABCC4	1:146127087-146275409	con	SY_0.45	5.85454	11.7256	1.00203	5e-05	0.00100478	yes
F10	1:137579844-137592401	con	SY_0.45	2.17658	4.35517	1.00066	0.00135	0.0172523	yes
CAPN2	3:17691063-17711286	con	SY_0.45	31.2194	15.586	-1.00219	5e-05	0.00100478	yes
ENSGALG00000028451	11:2178883-2180407	con	SY_0.45	387.889	193.6	-1.00257	5e-05	0.00100478	yes
GTSF1	27:1212096-1223346	con	SY_0.45	20.2075	10.0727	-1.00444	0.00015	0.00264299	yes
SGPP2	9:7968540-7990682	con	SY_0.45	12.9645	6.45958	-1.00505	0.00075	0.0106137	yes
DMRT2	Z:26043374-26046985	con	SY_0.45	28.1177	14.0007	-1.00597	5e-05	0.00100478	yes
TJP2	Z:34585925-34650856	con	SY_0.45	108.433	53.9883	-1.00608	5e-05	0.00100478	yes
ARHGAP25	22:300018-316574	con	SY_0.45	13.7925	6.8602	-1.00756	0.0004	0.0062097	yes
ENSGALG00000046098	5:17004710-17006082	con	SY_0.45	34.4319	17.0824	-1.01123	0.0014	0.0177562	yes
DENND2D	26:1020204-1027765	con	SY_0.45	70.3886	34.899	-1.01216	5e-05	0.00100478	yes
TUBB	17:2360752-2370299	con	SY_0.45	736.474	364.94	-1.01298	0.00015	0.00264299	yes
MBTD1	18:5125935-5169680	con	SY_0.45	19.3461	9.56676	-1.01594	0.0001	0.00186982	yes
HEXDC	18:3547252-3553889	con	SY_0.45	10.072	4.97259	-1.01828	0.00055	0.00813443	yes
NOS1	15:11357296-11386044	con	SY_0.45	37.7921	18.6116	-1.02189	5e-05	0.00100478	yes
SGMS2	4:38259657-38285988	con	SY_0.45	98.41	48.3682	-1.02475	5e-05	0.00100478	yes
VMP1	19:7319452-7375427	con	SY_0.45	112.326	55.1304	-1.02678	5e-05	0.00100478	yes
SMIM15	Z:19017607-19204794	con	SY_0.45	203.436	99.7642	-1.02798	5e-05	0.00100478	yes
C7	Z:12937308-12956457	con	SY_0.45	5.04649	2.47469	-1.02803	0.0001	0.00186982	yes
HNF1B	19:8668216-8683224	con	SY_0.45	39.5194	19.3745	-1.0284	5e-05	0.00100478	yes
VOPP1	2:51842818-51912220	con	SY_0.45	10.1687	4.97906	-1.03019	0.00235	0.0271421	yes
ENSGALG00000017706	Z:61011124-61071967	con	SY_0.45	37.5667	18.3792	-1.03138	5e-05	0.00100478	yes
SLC4A7	2:38586293-38666471	con	SY_0.45	96.2355	47.0709	-1.03173	5e-05	0.00100478	yes
SPG20	1:172618671-172629426	con	SY_0.45	44.7592	21.888	-1.03204	5e-05	0.00100478	yes
SUCLG1	4:86749465-86764991	con	SY_0.45	154.543	75.4849	-1.03375	5e-05	0.00100478	yes
LRRC31	9:20002981-20011556	con	SY_0.45	17.5468	8.56755	-1.03426	0.0001	0.00186982	yes
SLC6A4	19:6202078-6214207	con	SY_0.45	6.63069	3.23661	-1.03468	0.0004	0.0062097	yes
UCK2	8:5499624-5536475	con	SY_0.45	80.9344	39.5018	-1.03483	0.0016	0.0198253	yes
ENSGALG00000029783	AADN04024629.1:4522-14980	con	SY_0.45	18.3537	8.9564	-1.03508	5e-05	0.00100478	yes
TACC3	4:84469255-84488069	con	SY_0.45	96.3375	46.9507	-1.03695	5e-05	0.00100478	yes
RFTN2	7:10267650-10296410	con	SY_0.45	7.77076	3.77824	-1.04034	0.00015	0.00264299	yes
angiopoietin-2B	3:88911017-89032445	con	SY_0.45	36.2663	17.6316	-1.04047	5e-05	0.00100478	yes
LAMA2	3:58293668-58629545	con	SY_0.45	10.6492	5.17628	-1.04076	5e-05	0.00100478	yes
SKP2	Z:10937323-10990078	con	SY_0.45	24.8776	12.0775	-1.04252	0.0011	0.0145127	yes
ENSGALG00000012072	7:28389232-28403654	con	SY_0.45	18.8955	9.15839	-1.04488	5e-05	0.00100478	yes
FRMD4A	1:6872403-6904583	con	SY_0.45	13.9468	6.75765	-1.04534	0.0001	0.00186982	yes
NSD2	4:83802146-83861078	con	SY_0.45	10.781	5.22343	-1.04542	5e-05	0.00100478	yes
NBEAL1	7:13734318-13819369	con	SY_0.45	32.2667	15.6149	-1.04712	5e-05	0.00100478	yes
PDXK	1:110069291-110113597	con	SY_0.45	87.3757	42.2685	-1.04765	5e-05	0.00100478	yes
ENSGALG00000021627	23:4357814-4358727	con	SY_0.45	73.0053	35.2626	-1.04986	0.00065	0.00942675	yes
KLHL14	2:106913657-106974273	con	SY_0.45	14.0463	6.77479	-1.05194	5e-05	0.00100478	yes
LDHB	1:67084336-67094047	con	SY_0.45	711.713	342.341	-1.05586	5e-05	0.00100478	yes
FDFT1	3:107816739-107827820	con	SY_0.45	106.976	51.3841	-1.05789	5e-05	0.00100478	yes
ZNFX1	20:6906826-6918959	con	SY_0.45	13.1514	6.30407	-1.06086	5e-05	0.00100478	yes
ADORA2A	15:8526760-8536246	con	SY_0.45	102.191	48.9472	-1.06198	5e-05	0.00100478	yes
KCNK5	3:29274505-29304143	con	SY_0.45	19.9765	9.56701	-1.06216	5e-05	0.00100478	yes
ENSGALG00000028749	18:9281786-9308577	con	SY_0.45	2358.93	1129.27	-1.06274	0.00475	0.0475141	yes
ENSGALG00000033362	15:5672890-5675877	con	SY_0.45	5.33831	2.54909	-1.0664	0.0039	0.0404253	yes
MBD3	28:2453801-2470213	con	SY_0.45	13.8963	6.62342	-1.06905	0.00035	0.00554229	yes
MECOM	9:20063009-20363223	con	SY_0.45	144.121	68.5563	-1.07192	5e-05	0.00100478	yes
DSE	3:64034687-64054970	con	SY_0.45	29.6463	14.0249	-1.07986	5e-05	0.00100478	yes
PDE7A	2:115238662-115308978	con	SY_0.45	28.9838	13.6972	-1.08136	5e-05	0.00100478	yes
G0S2	26:3140220-3141106	con	SY_0.45	95.1499	44.9238	-1.08272	5e-05	0.00100478	yes
CRMP1A	4:79798865-79843362	con	SY_0.45	74.3456	35.0754	-1.08379	5e-05	0.00100478	yes
Dab1	8:25927811-26016403	con	SY_0.45	14.3072	6.74572	-1.08469	5e-05	0.00100478	yes
FSD1L	Z:55008369-55037122	con	SY_0.45	5.27221	2.47744	-1.08956	0.00025	0.00413407	yes
RNF146	3:59406314-59407373	con	SY_0.45	50.6065	23.7192	-1.09327	5e-05	0.00100478	yes
MOV10	26:3544655-3556153	con	SY_0.45	17.5737	8.23507	-1.09356	0.00125	0.0161431	yes
ENSGALG00000029776	AADN04020304.1:308-1901	con	SY_0.45	90.5738	42.4166	-1.09447	5e-05	0.00100478	yes
FP	8:18795461-18813236	con	SY_0.45	25.9553	12.1472	-1.0954	5e-05	0.00100478	yes
MRC2	27:2576055-2597588	con	SY_0.45	41.036	19.1429	-1.10008	5e-05	0.00100478	yes
NR5A2	8:1592875-1687096	con	SY_0.45	3.19204	1.4889	-1.10024	0.00035	0.00554228	yes
NARF	18:3449626-3532446	con	SY_0.45	24.0234	11.2008	-1.10084	0.0035	0.0372263	yes
GRHL2	2:129435467-129485773	con	SY_0.45	30.4318	14.1789	-1.10183	5e-05	0.00100478	yes
ENSGALG00000007570	4:11492246-11500746	con	SY_0.45	174.706	81.3628	-1.10249	5e-05	0.00100478	yes
MMEL1	21:1372223-1393392	con	SY_0.45	1.573	0.730417	-1.10672	0.00455	0.0459926	yes
ENSGALG00000014126	1:68381260-68385975	con	SY_0.45	30.9359	14.3199	-1.11126	5e-05	0.00100478	yes
TLE1	Z:39184186-39254335	con	SY_0.45	7.85196	3.63291	-1.11193	5e-05	0.00100478	yes
NPM3	6:22696474-22699672	con	SY_0.45	6.75761	3.12149	-1.11428	0.0037	0.0387405	yes
SMAD3	10:18812336-18872532	con	SY_0.45	24.2204	11.1682	-1.11683	5e-05	0.00100478	yes
ENSGALG00000042961	26:1166879-1171654	con	SY_0.45	7.47858	3.4466	-1.11759	0.00015	0.00264299	yes
SLC25A29	5:48617964-48625370	con	SY_0.45	58.9466	27.1224	-1.11993	5e-05	0.00100478	yes
ENSGALG00000041621	2:148464757-148470888	con	SY_0.45	224.805	103.393	-1.12053	5e-05	0.00100478	yes
PRSS23	1:188867452-188868571	con	SY_0.45	22.4559	10.3073	-1.12343	5e-05	0.00100478	yes
RHOF	15:5657770-5666735	con	SY_0.45	25.7657	11.8002	-1.12664	5e-05	0.00100478	yes
ENSGALG00000006868	5:15714416-15737602	con	SY_0.45	119.905	54.8447	-1.12847	5e-05	0.00100478	yes
TP53INP1	2:126909066-127051879	con	SY_0.45	65.1226	29.7478	-1.13037	0.00215	0.0251344	yes
ENSGALG00000039631	AADN04005824.1:1654-12872	con	SY_0.45	3.56735	1.62899	-1.13087	0.0002	0.00339495	yes
NELFA	4:83757395-83780690	con	SY_0.45	176.183	80.3655	-1.13243	5e-05	0.00100478	yes
NUAK1	1:53983408-54028357	con	SY_0.45	9.29624	4.23566	-1.13406	0.00015	0.00264299	yes
CHRD	9:15979704-15988790	con	SY_0.45	77.2807	35.2117	-1.13406	5e-05	0.00100478	yes
UNC93A	3:42528288-42549146	con	SY_0.45	3.80973	1.73291	-1.1365	0.00135	0.0172523	yes
MLLT3	Z:34030582-34141800	con	SY_0.45	35.7334	16.2534	-1.13653	5e-05	0.00100478	yes
C5orf30	Z:49956073-49965412	con	SY_0.45	122.977	55.8974	-1.13754	5e-05	0.00100478	yes
FAM83F	1:50300710-50313130	con	SY_0.45	19.2855	8.74344	-1.14124	5e-05	0.00100478	yes
ENSGALG00000023821	27:5245707-5249520	con	SY_0.45	2.28311	1.03463	-1.14189	0.00355	0.0375501	yes
PTGR1	Z:66488488-66508364	con	SY_0.45	45.4574	20.5582	-1.1448	5e-05	0.00100478	yes
LIMD2	27:2950470-2960895	con	SY_0.45	6.64173	2.98928	-1.15176	0.00145	0.0182869	yes
SSTR2	18:9063415-9065697	con	SY_0.45	2.05012	0.915834	-1.16255	0.0031	0.0337734	yes
PODN	8:24634399-24653942	con	SY_0.45	10.3	4.5924	-1.16532	5e-05	0.00100478	yes
EDN2	23:953065-958386	con	SY_0.45	11.9417	5.32432	-1.16533	5e-05	0.00100478	yes
NSDHL	4:11324986-11335529	con	SY_0.45	21.1053	9.40582	-1.16598	5e-05	0.00100478	yes
ACSL5	6:26724691-26741477	con	SY_0.45	27.8935	12.3794	-1.17198	5e-05	0.00100478	yes
ENSGALG00000044688	21:4838411-4840380	con	SY_0.45	50.7918	22.4907	-1.17526	5e-05	0.00100478	yes
TMEM106B	2:26625915-26756149	con	SY_0.45	97.171	43.0167	-1.17563	5e-05	0.00100478	yes
PAN3	1:175945882-176020918	con	SY_0.45	43.5749	19.2576	-1.17807	5e-05	0.00100478	yes
ENSGALG00000033226	1:7293528-7352456	con	SY_0.45	15.2815	6.74492	-1.17992	5e-05	0.00100478	yes
ENSGALG00000040302	AADN04012003.1:5007-7505	con	SY_0.45	13.1891	5.81549	-1.18137	0.00195	0.0232822	yes
ENSGALG00000045399	5:48664408-48668414	con	SY_0.45	5.55043	2.44599	-1.18218	0.00315	0.0342904	yes
SOX5	1:65938355-66226982	con	SY_0.45	19.1313	8.40544	-1.18654	5e-05	0.00100478	yes
LPCAT1	2:86095768-86157882	con	SY_0.45	8.0973	3.55667	-1.18691	5e-05	0.00100478	yes
KLHL36	11:17068156-17080221	con	SY_0.45	14.1395	6.20184	-1.18896	5e-05	0.00100478	yes
SYBU	2:132644384-132674117	con	SY_0.45	9.54682	4.18303	-1.19047	5e-05	0.00100478	yes
ENSGALG00000009830	4:29895486-29925015	con	SY_0.45	70.1588	30.7373	-1.19063	5e-05	0.00100478	yes
ADK	6:15100447-15373532	con	SY_0.45	191.88	83.81	-1.19501	5e-05	0.00100478	yes
PIP5K1B	Z:34474301-34571297	con	SY_0.45	51.2969	22.3671	-1.1975	5e-05	0.00100478	yes
ENSGALG00000032750	26:1156251-1162125	con	SY_0.45	3.56478	1.55205	-1.19964	0.0001	0.00186982	yes
ENSGALG00000012847	1:56693092-56705912	con	SY_0.45	7.50388	3.26313	-1.20138	0.0003	0.00485928	yes
ENSGALG00000009291	3:17239078-17259481	con	SY_0.45	79.1871	34.4298	-1.20161	5e-05	0.00100478	yes
BEAN1	11:11619892-11657333	con	SY_0.45	5.77	2.50601	-1.20318	0.00175	0.0213494	yes
RASL11B	4:66369834-66373520	con	SY_0.45	28.6412	12.3791	-1.21019	5e-05	0.00100478	yes
ZADH2	2:91704832-91707742	con	SY_0.45	54.4037	23.4835	-1.21206	5e-05	0.00100478	yes
ENSGALG00000006048	19:9911182-9914048	con	SY_0.45	14.2202	6.12398	-1.2154	0.0005	0.00750223	yes
WIPF3	2:33916993-33935957	con	SY_0.45	63.2113	27.1469	-1.21939	5e-05	0.00100478	yes
DIS3L	10:18467489-18482742	con	SY_0.45	30.0404	12.7894	-1.23196	5e-05	0.00100478	yes
BRK-3	7:11874179-11969327	con	SY_0.45	97.0593	41.2262	-1.2353	5e-05	0.00100478	yes
ATP8A1	4:68573328-68662442	con	SY_0.45	42.4138	18.0078	-1.23591	5e-05	0.00100478	yes
PALMD	8:12119138-12143256	con	SY_0.45	39.8035	16.8753	-1.23798	5e-05	0.00100478	yes
ENSGALG00000013427	4:61488305-61532397	con	SY_0.45	38.0039	16.0693	-1.24184	5e-05	0.00100478	yes
ENSGALG00000014324	1:75871015-75879214	con	SY_0.45	227.58	96.0642	-1.2443	5e-05	0.00100478	yes
GRAMD1B	24:2901397-3006641	con	SY_0.45	8.79289	3.70919	-1.24523	5e-05	0.00100478	yes
FMO3	8:4824821-4831264	con	SY_0.45	13.7177	5.78054	-1.24676	5e-05	0.00100478	yes
LHFPL5	26:93766-97080	con	SY_0.45	17.626	7.41738	-1.24872	5e-05	0.00100478	yes
SCRN1	2:33940268-33974780	con	SY_0.45	15.9018	6.68151	-1.25094	5e-05	0.00100478	yes
ENSGALG00000021552	18:4107615-4108893	con	SY_0.45	2772.66	1162.79	-1.25368	0.00015	0.00264299	yes
SLC39A8	4:61121024-61141216	con	SY_0.45	773.099	323.239	-1.25805	5e-05	0.00100478	yes
C1orf198	3:40659666-40679553	con	SY_0.45	23.5534	9.83876	-1.25939	5e-05	0.00100478	yes
VANGL2	25:1256422-1261166	con	SY_0.45	35.1516	14.67	-1.26072	5e-05	0.00100478	yes
BNC2	Z:32351222-32692277	con	SY_0.45	1.61703	0.673897	-1.26274	0.0004	0.0062097	yes
SLC26A5	1:13005188-13038545	con	SY_0.45	25.4557	10.5844	-1.26605	5e-05	0.00100478	yes
STK17A	2:51671798-51696372	con	SY_0.45	32.8469	13.646	-1.26728	5e-05	0.00100478	yes
KCNN2	Z:73269455-73338347	con	SY_0.45	86.2104	35.754	-1.26976	5e-05	0.00100478	yes
ADCY8	2:140988803-141106986	con	SY_0.45	2.54519	1.0517	-1.27504	5e-05	0.00100478	yes
PLBD1	1:48929923-48958286	con	SY_0.45	17.6324	7.25893	-1.2804	5e-05	0.00100478	yes
CNTNAP5	7:24545118-24814619	con	SY_0.45	0.999021	0.410619	-1.28271	0.0009	0.0122342	yes
ENSGALG00000023936	21:2221201-2229269	con	SY_0.45	11.0993	4.54779	-1.28723	5e-05	0.00100478	yes
CRYBA2	7:22475555-22477894	con	SY_0.45	7.86866	3.22387	-1.28733	0.00245	0.028152	yes
SCNN1B	14:7001816-7013562	con	SY_0.45	233.251	95.4766	-1.28866	5e-05	0.00100478	yes
HPX	1:194439298-194442894	con	SY_0.45	596.93	243.783	-1.29197	5e-05	0.00100478	yes
ARHGEF26	9:23309858-23353078	con	SY_0.45	33.3604	13.617	-1.29273	5e-05	0.00100478	yes
CHAC1	5:24438648-24440766	con	SY_0.45	12.7805	5.1985	-1.29778	5e-05	0.00100478	yes
SOX6	5:11115669-11366088	con	SY_0.45	2.35506	0.956825	-1.29944	0.00055	0.00813443	yes
SUCO	8:4492612-4529747	con	SY_0.45	76.49	30.9677	-1.30451	5e-05	0.00100478	yes
ENSGALG00000000378	22:1190200-1195716	con	SY_0.45	18.0083	7.27087	-1.30846	0.00165	0.0202952	yes
ARHGEF28	Z:24570222-24702341	con	SY_0.45	60.9018	24.5828	-1.30884	5e-05	0.00100478	yes
RPIA	4:86722232-86737031	con	SY_0.45	180.074	72.6225	-1.3101	5e-05	0.00100478	yes
FECH	Z:380961-391867	con	SY_0.45	12.6553	5.09698	-1.31203	5e-05	0.00100478	yes
DENND4C	Z:33679445-33728466	con	SY_0.45	30.2765	12.1852	-1.31307	5e-05	0.00100478	yes
SPDEF	26:4355983-4357800	con	SY_0.45	109.327	43.9962	-1.3132	5e-05	0.00100478	yes
DDIT4	6:11459152-11459905	con	SY_0.45	33.9045	13.6321	-1.31447	0.00015	0.00264299	yes
ENSGALG00000042370	AADN04001414.1:2428-5488	con	SY_0.45	1.96337	0.788921	-1.31538	0.004	0.0412709	yes
HTR1B	3:80361172-80362338	con	SY_0.45	155.324	62.2852	-1.31832	5e-05	0.00100478	yes
ENSGALG00000016732	3:111265110-111274122	con	SY_0.45	23.6692	9.48085	-1.31992	5e-05	0.00100478	yes
HLCS	1:106864785-106977050	con	SY_0.45	14.1094	5.64011	-1.32286	5e-05	0.00100478	yes
ENSGALG00000013912	3:55353547-55358626	con	SY_0.45	42.7225	17.0602	-1.32436	5e-05	0.00100478	yes
DAO	15:6661768-6666141	con	SY_0.45	6.6971	2.66945	-1.32699	0.0001	0.00186982	yes
ENSGALG00000000295	26:867136-875006	con	SY_0.45	1.15398	0.457464	-1.33489	0.00065	0.00942675	yes
MSX2	13:9797291-9802103	con	SY_0.45	547.316	216.925	-1.33518	5e-05	0.00100478	yes
GATA3	1:4402131-4591692	con	SY_0.45	37.2076	14.6613	-1.34358	5e-05	0.00100478	yes
LHFPL2	Z:22593955-22715343	con	SY_0.45	7.18572	2.82685	-1.34593	0.00015	0.00264299	yes
ENSGALG00000006717	5:14871235-14911577	con	SY_0.45	1.80207	0.708665	-1.34648	5e-05	0.00100478	yes
ENSGALG00000011086	3:40139163-40141584	con	SY_0.45	309.17	121.55	-1.34685	5e-05	0.00100478	yes
TLR3	4:61707201-61720669	con	SY_0.45	33.4428	13.0379	-1.35899	5e-05	0.00100478	yes
ENSGALG00000019718	27:4965384-4969837	con	SY_0.45	20.7303	8.03863	-1.36672	5e-05	0.00100478	yes
ENSGALG00000046551	20:10700552-10702590	con	SY_0.45	31.9544	12.3758	-1.36849	5e-05	0.00100478	yes
AP1S2	1:121850196-121884181	con	SY_0.45	101.245	39.1223	-1.37179	5e-05	0.00100478	yes
PRR5L	5:19446689-19474414	con	SY_0.45	3.03216	1.16905	-1.37501	0.0032	0.0346662	yes
USP13	9:17437021-17477511	con	SY_0.45	24.5001	9.38434	-1.38446	5e-05	0.00100478	yes
ABCA4	8:13683888-13758163	con	SY_0.45	4.66218	1.78064	-1.38861	5e-05	0.00100478	yes
IRX3	11:4648343-4649811	con	SY_0.45	6.62081	2.52271	-1.39204	0.00085	0.0116845	yes
ENSGALG00000010653	3:34311458-34422873	con	SY_0.45	4.13655	1.56305	-1.40407	0.00085	0.0116845	yes
SNX10	2:32275229-32308776	con	SY_0.45	15.2516	5.73978	-1.40989	5e-05	0.00100478	yes
SNX16	2:122059413-122083050	con	SY_0.45	30.4176	11.4439	-1.41032	5e-05	0.00100478	yes
GNA14	Z:37709881-37769362	con	SY_0.45	12.5768	4.71767	-1.41462	5e-05	0.00100478	yes
ENSGALG00000030769	4:61536298-61629758	con	SY_0.45	20.3693	7.58202	-1.42574	5e-05	0.00100478	yes
TNFSF10	9:19373429-19382089	con	SY_0.45	312.947	116.423	-1.42654	5e-05	0.00100478	yes
XAF1	19:9787706-9792676	con	SY_0.45	3.88328	1.44368	-1.42753	0.00295	0.032508	yes
STARD8	4:559644-600269	con	SY_0.45	34.7335	12.9	-1.42895	5e-05	0.00100478	yes
SCNN1G	14:7019085-7028500	con	SY_0.45	189.114	70.133	-1.43109	5e-05	0.00100478	yes
SLC2A12	3:56395892-56424175	con	SY_0.45	86.8689	32.0801	-1.43716	5e-05	0.00100478	yes
B3GAT2	3:82815249-82837344	con	SY_0.45	2.72355	1.00107	-1.44395	0.0029	0.0320622	yes
E2F7	1:38293245-38312033	con	SY_0.45	1.41651	0.51958	-1.44692	0.00115	0.0150835	yes
ENSGALG00000039939	18:6011513-6014434	con	SY_0.45	49.4927	18.1321	-1.44867	5e-05	0.00100478	yes
ENSGALG00000033399	AADN04001411.1:2281-8005	con	SY_0.45	1.89755	0.693433	-1.45231	0.00225	0.0261218	yes
ENSGALG00000027056	1:59476228-59483268	con	SY_0.45	29.1875	10.6318	-1.45697	5e-05	0.00100478	yes
MET	1:24918556-25006337	con	SY_0.45	6.76408	2.46207	-1.45802	5e-05	0.00100478	yes
COL15A1	2:55990570-56094186	con	SY_0.45	2.08969	0.756757	-1.46539	0.0001	0.00186982	yes
ENSGALG00000019847	3:107860149-107861091	con	SY_0.45	420.127	151.311	-1.47331	5e-05	0.00100478	yes
NTM	24:1863779-2108022	con	SY_0.45	10.8461	3.89492	-1.47751	5e-05	0.00100478	yes
PLPP4	6:30550104-30594979	con	SY_0.45	9.28255	3.33	-1.479	0.00045	0.00682822	yes
TESC	15:11411292-11414048	con	SY_0.45	35.3355	12.674	-1.47924	5e-05	0.00100478	yes
MYRF	5:183510-218679	con	SY_0.45	28.3757	10.1589	-1.48191	5e-05	0.00100478	yes
ELAVL4	8:23628028-23700939	con	SY_0.45	3.63136	1.29724	-1.48507	5e-05	0.00100478	yes
DLGAP5	5:56376118-56394486	con	SY_0.45	10.8711	3.88289	-1.48529	5e-05	0.00100478	yes
KRT19	27:4972721-4977524	con	SY_0.45	862.667	304.686	-1.50148	5e-05	0.00100478	yes
DCAF12	Z:7511920-7540939	con	SY_0.45	79.3542	27.9703	-1.50441	5e-05	0.00100478	yes
CCKAR	4:73695609-73702467	con	SY_0.45	1.17658	0.413337	-1.50921	0.00425	0.0435495	yes
SMIM5	18:4833138-4870020	con	SY_0.45	55.1828	19.2718	-1.51773	5e-05	0.00100478	yes
ENSGALG00000011962	4:54545703-54562470	con	SY_0.45	21.7163	7.57414	-1.51963	5e-05	0.00100478	yes
RRM2	3:96931858-96936929	con	SY_0.45	1.2939	0.449506	-1.52532	0.00285	0.0316134	yes
NCAPG	4:76452107-76480363	con	SY_0.45	4.9325	1.71123	-1.52728	5e-05	0.00100478	yes
CHST12	14:3145181-3146474	con	SY_0.45	614.978	212.933	-1.53013	5e-05	0.00100478	yes
ENSGALG00000039459	18:6011513-6014434	con	SY_0.45	75.8473	26.1831	-1.53446	5e-05	0.00100478	yes
HAS2	2:137467300-137485205	con	SY_0.45	170.006	58.6479	-1.53543	5e-05	0.00100478	yes
BCAT1	1:65432215-65472333	con	SY_0.45	55.8507	19.2001	-1.54046	5e-05	0.00100478	yes
AMN1	1:59452518-59473212	con	SY_0.45	16.6678	5.70859	-1.54586	5e-05	0.00100478	yes
CSGALNACT2	6:4770392-4784692	con	SY_0.45	50.761	17.3798	-1.54631	5e-05	0.00100478	yes
ENSGALG00000017032	1:170511178-170526983	con	SY_0.45	77.4554	26.5046	-1.54712	5e-05	0.00100478	yes
ENSGALG00000000568	26:423512-463485	con	SY_0.45	4.41904	1.50009	-1.55869	0.00225	0.0261218	yes
ENSGALG00000007710	4:12285789-12294879	con	SY_0.45	76.9759	26.1026	-1.56022	5e-05	0.00100478	yes
ZFAND5	Z:35736062-35750582	con	SY_0.45	54.8011	18.5296	-1.56437	5e-05	0.00100478	yes
GLIS3	Z:26854032-26967182	con	SY_0.45	0.634366	0.214439	-1.56475	0.00425	0.0435495	yes
SNAP91	3:77916879-77987344	con	SY_0.45	36.4965	12.3354	-1.56495	5e-05	0.00100478	yes
PER3	21:272582-291803	con	SY_0.45	4.04747	1.35546	-1.57824	5e-05	0.00100478	yes
NPTX1	18:9564599-9566930	con	SY_0.45	5.66706	1.89649	-1.57927	0.0002	0.00339495	yes
GPAM	6:26635202-26660787	con	SY_0.45	24.0629	8.02316	-1.58457	5e-05	0.00100478	yes
GATA2	12:9198667-9214691	con	SY_0.45	248.878	82.8788	-1.58636	5e-05	0.00100478	yes
Edar	1:136466223-136492266	con	SY_0.45	3.21493	1.06847	-1.58925	0.00045	0.00682822	yes
HLF	18:5980975-6011456	con	SY_0.45	72.841	24.0772	-1.59708	5e-05	0.00100478	yes
Sial-T2	1:66641207-66757539	con	SY_0.45	50.8741	16.7701	-1.60104	5e-05	0.00100478	yes
OSGIN1	11:2658955-2694119	con	SY_0.45	105.46	34.7465	-1.60175	5e-05	0.00100478	yes
ENSGALG00000039269	18:9594759-9619312	con	SY_0.45	3.99195	1.31374	-1.60341	5e-05	0.00100478	yes
YPEL1	15:555263-562933	con	SY_0.45	85.0759	27.9359	-1.60663	0.0002	0.00339495	yes
ATP7B	1:170322065-170351964	con	SY_0.45	1.13275	0.371795	-1.60725	5e-05	0.00100478	yes
SEPSECS	4:74019755-74043563	con	SY_0.45	52.095	17.0836	-1.60853	5e-05	0.00100478	yes
Lrrn1	12:18314288-18331017	con	SY_0.45	7.31303	2.39367	-1.61125	5e-05	0.00100478	yes
ADRA2A	6:26252414-26253698	con	SY_0.45	33.5882	10.9193	-1.62108	5e-05	0.00100478	yes
ADAMTS8	24:1657702-1668923	con	SY_0.45	13.7398	4.46511	-1.62159	5e-05	0.00100478	yes
ASIC4	7:22207311-22226474	con	SY_0.45	1.77902	0.573349	-1.6336	0.0002	0.00339495	yes
ENSGALG00000004946	9:9318985-9370173	con	SY_0.45	0.892339	0.285293	-1.64515	0.00115	0.0150835	yes
ENSGALG00000041372	2:44156260-44201027	con	SY_0.45	37.1387	11.8452	-1.64862	5e-05	0.00100478	yes
MTCL1	2:98980102-99067476	con	SY_0.45	4.36201	1.39013	-1.64977	5e-05	0.00100478	yes
RNF144B	2:60441861-60473502	con	SY_0.45	7.18123	2.28178	-1.65407	5e-05	0.00100478	yes
ENSGALG00000030855	2:44262333-44346921	con	SY_0.45	189.768	60.215	-1.65604	5e-05	0.00100478	yes
SLC6A14	4:3062273-3075508	con	SY_0.45	153.877	48.8262	-1.65605	5e-05	0.00100478	yes
ENSGALG00000032851	2:110860249-110861917	con	SY_0.45	168.513	53.0756	-1.66674	5e-05	0.00100478	yes
ENSGALG00000020554	Z:33379223-33557131	con	SY_0.45	26.314	8.27104	-1.66969	5e-05	0.00100478	yes
PIGR	26:2579725-2590284	con	SY_0.45	104.055	32.6564	-1.67191	5e-05	0.00100478	yes
TOX2	20:2376244-2489922	con	SY_0.45	7.40173	2.31615	-1.67613	5e-05	0.00100478	yes
TSHZ1	2:91647485-91699829	con	SY_0.45	10.7855	3.33512	-1.69328	5e-05	0.00100478	yes
EPHA7	3:74171527-74327787	con	SY_0.45	0.879096	0.269848	-1.70387	0.0001	0.00186982	yes
SHMT1	14:5132125-5136038	con	SY_0.45	8.31983	2.53309	-1.71566	5e-05	0.00100478	yes
CP49	2:42607306-42777858	con	SY_0.45	2.40436	0.732036	-1.71567	0.0001	0.00186982	yes
ENSGALG00000044155	1:47946786-47951465	con	SY_0.45	56.5087	16.8737	-1.7437	5e-05	0.00100478	yes
MCF2	4:5064751-5112915	con	SY_0.45	40.4384	12.074	-1.74383	5e-05	0.00100478	yes
FGF14	1:143252844-143354891	con	SY_0.45	4.35976	1.29671	-1.74939	0.00035	0.00554228	yes
ENSGALG00000026768	Z:50223339-50282675	con	SY_0.45	4.84994	1.44143	-1.75047	5e-05	0.00100478	yes
SOX13	26:1683808-1703852	con	SY_0.45	95.4278	28.2265	-1.75736	5e-05	0.00100478	yes
RAB32	3:47006776-47025939	con	SY_0.45	32.3728	9.56573	-1.75883	5e-05	0.00100478	yes
MOGAT1	9:8038069-8049501	con	SY_0.45	4.81598	1.42045	-1.76148	0.0012	0.0156174	yes
ENSGALG00000033925	4:83722054-83733392	con	SY_0.45	195.992	57.7732	-1.76232	5e-05	0.00100478	yes
EPSTI1	1:166655213-166707862	con	SY_0.45	2.59071	0.761353	-1.76671	5e-05	0.00100478	yes
MYCL	23:5548133-5550962	con	SY_0.45	8.02986	2.3532	-1.77075	5e-05	0.00100478	yes
ENSGALG00000023601	3:13782735-13795714	con	SY_0.45	35.3497	10.273	-1.78284	5e-05	0.00100478	yes
STAT1	7:7920233-7940268	con	SY_0.45	150.717	43.629	-1.78848	5e-05	0.00100478	yes
ENSGALG00000026383	1:123358483-123360112	con	SY_0.45	1980.18	571.533	-1.79272	5e-05	0.00100478	yes
PACSIN1	26:4361059-4364487	con	SY_0.45	13.4822	3.80879	-1.82365	5e-05	0.00100478	yes
NPY	2:31520569-31529071	con	SY_0.45	240.917	67.7429	-1.83039	5e-05	0.00100478	yes
NEFL	22:952290-957139	con	SY_0.45	9.21627	2.58104	-1.83623	5e-05	0.00100478	yes
DOCK10	9:8507494-8609908	con	SY_0.45	8.55965	2.39567	-1.83712	5e-05	0.00100478	yes
MCHR2	14:14407360-14411064	con	SY_0.45	6.12872	1.70856	-1.84281	0.0004	0.0062097	yes
PSAT1	Z:37963279-37978569	con	SY_0.45	19.5164	5.41958	-1.84843	5e-05	0.00100478	yes
ENSGALG00000041296	3:107272766-107275351	con	SY_0.45	293.779	81.128	-1.85646	5e-05	0.00100478	yes
VAMP1	1:76915076-76917933	con	SY_0.45	16.9467	4.6664	-1.86063	5e-05	0.00100478	yes
HEY2	3:60044510-60053824	con	SY_0.45	38.1898	10.4973	-1.86317	5e-05	0.00100478	yes
GJB1	4:2330649-2333141	con	SY_0.45	36.263	9.94406	-1.86659	5e-05	0.00100478	yes
ENSGALG00000021092	9:9524182-9530093	con	SY_0.45	0.814839	0.223205	-1.86814	0.00275	0.0308092	yes
HES5	21:1416931-1418581	con	SY_0.45	2.45686	0.668919	-1.87691	0.0006	0.00877737	yes
ENSGALG00000001483	21:2097420-2103217	con	SY_0.45	133.584	36.3556	-1.8775	5e-05	0.00100478	yes
ISM1	3:12714884-12753773	con	SY_0.45	14.9543	4.04099	-1.88777	5e-05	0.00100478	yes
GABRG1	4:67576490-67624911	con	SY_0.45	5.17553	1.39753	-1.88883	5e-05	0.00100478	yes
LMO3	1:63383605-63450107	con	SY_0.45	0.932254	0.247702	-1.91212	0.0035	0.0372263	yes
ENSGALG00000028982	3:95396265-95400963	con	SY_0.45	33.5646	8.91421	-1.91276	5e-05	0.00100478	yes
CAPN6	4:13384417-13431218	con	SY_0.45	2.27081	0.602778	-1.91351	5e-05	0.00100478	yes
TCERG1L	6:34626203-34707794	con	SY_0.45	111.51	29.531	-1.91687	5e-05	0.00100478	yes
DLG1	9:12488711-12640489	con	SY_0.45	69.4144	18.334	-1.92071	5e-05	0.00100478	yes
SLC6A11	12:4050551-4133425	con	SY_0.45	1.14154	0.301342	-1.92151	0.0009	0.0122342	yes
ENSGALG00000036108	21:2080808-2096566	con	SY_0.45	153.221	40.1955	-1.93051	5e-05	0.00100478	yes
CDO1	Z:72942622-72952484	con	SY_0.45	15.6034	4.08383	-1.93386	5e-05	0.00100478	yes
ENSGALG00000008283	9:15737983-15742734	con	SY_0.45	14.6369	3.75111	-1.96422	5e-05	0.00100478	yes
GMNN	2:90523232-90528650	con	SY_0.45	86.9031	22.1151	-1.97438	5e-05	0.00100478	yes
NLGN3	4:2335564-2353557	con	SY_0.45	10.5344	2.63034	-2.00178	5e-05	0.00100478	yes
GLDN	10:9240918-9255900	con	SY_0.45	1.38663	0.34277	-2.01627	0.00105	0.0139903	yes
SPSB4	9:6576885-6663551	con	SY_0.45	11.2231	2.72549	-2.04189	5e-05	0.00100478	yes
ENSGALG00000015263	1:84584802-84592547	con	SY_0.45	17.0067	4.09013	-2.05588	5e-05	0.00100478	yes
SYT12	5:1444686-1451053	con	SY_0.45	4.2584	1.00712	-2.08008	5e-05	0.00100478	yes
FRMPD4	1:123533141-123555601	con	SY_0.45	5.94165	1.38901	-2.09681	5e-05	0.00100478	yes
BCAS1	20:12593354-12627734	con	SY_0.45	10.4925	2.44198	-2.10324	5e-05	0.00100478	yes
ENSGALG00000029456	4:84503284-84508288	con	SY_0.45	58.4135	13.4942	-2.11396	5e-05	0.00100478	yes
ENSGALG00000007080	13:17126955-17144545	con	SY_0.45	26.5989	6.06246	-2.13339	5e-05	0.00100478	yes
ENSGALG00000043817	1:75880171-75881531	con	SY_0.45	63.6896	14.4257	-2.14242	5e-05	0.00100478	yes
ENSGALG00000013057	1:62144163-62154171	con	SY_0.45	40.9751	9.26835	-2.14436	5e-05	0.00100478	yes
ENSGALG00000034695	17:2371746-2378780	con	SY_0.45	10.7891	2.43925	-2.14507	5e-05	0.00100478	yes
EMB	Z:14736700-14761276	con	SY_0.45	154.493	34.4866	-2.16343	5e-05	0.00100478	yes
ENSGALG00000045085	6:19356960-19360731	con	SY_0.45	29.3953	6.49567	-2.17804	5e-05	0.00100478	yes
SLC6A13	1:60262381-60287559	con	SY_0.45	1.26392	0.279162	-2.17873	0.0014	0.0177562	yes
ENSGALG00000008681	17:2234851-2252988	con	SY_0.45	49.8312	10.9826	-2.18183	5e-05	0.00100478	yes
SLC12A2	Z:56691801-56743665	con	SY_0.45	109.29	23.7705	-2.20091	5e-05	0.00100478	yes
PDE8B	Z:23210325-23284124	con	SY_0.45	1.85773	0.399403	-2.21762	5e-05	0.00100478	yes
ENSGALG00000008759	9:16420967-16432613	con	SY_0.45	117.393	25.109	-2.22507	5e-05	0.00100478	yes
RSAD2	3:95406460-95415464	con	SY_0.45	4.1604	0.888823	-2.22676	5e-05	0.00100478	yes
ENSGALG00000030712	AADN04000776.1:10-7373	con	SY_0.45	41.01	8.6972	-2.23735	5e-05	0.00100478	yes
ENSGALG00000001136	21:1399142-1400827	con	SY_0.45	2.48993	0.526477	-2.24166	0.00035	0.00554228	yes
FN1	7:4390374-4439659	con	SY_0.45	411.542	86.6776	-2.24731	0.0008	0.0111684	yes
ENSGALG00000034065	4:84509163-84512376	con	SY_0.45	77.3839	16.2269	-2.25365	5e-05	0.00100478	yes
NOV	2:136568797-136574085	con	SY_0.45	9.8546	2.06613	-2.25386	5e-05	0.00100478	yes
COL19A1	3:83179141-83351003	con	SY_0.45	0.733912	0.152339	-2.26833	0.0002	0.00339495	yes
REEP1	4:86105020-86142977	con	SY_0.45	11.1754	2.30086	-2.28008	5e-05	0.00100478	yes
STK32A	13:18066210-18085473	con	SY_0.45	4.90695	0.993543	-2.30417	5e-05	0.00100478	yes
RORB	Z:36543162-36676401	con	SY_0.45	1.9316	0.386991	-2.31943	5e-05	0.00100478	yes
TBX22	4:1519494-1524660	con	SY_0.45	1.33092	0.266281	-2.32141	0.00025	0.00413407	yes
CHST1	5:23993358-23994615	con	SY_0.45	4.6636	0.931203	-2.32428	5e-05	0.00100478	yes
CD83	2:60893103-60904213	con	SY_0.45	28.8112	5.55308	-2.37527	5e-05	0.00100478	yes
ENSGALG00000001035	28:2204643-2216483	con	SY_0.45	11.2971	2.17702	-2.37553	5e-05	0.00100478	yes
ENSGALG00000006728	15:8813667-8842734	con	SY_0.45	3.55548	0.684792	-2.37631	5e-05	0.00100478	yes
ENSGALG00000041977	4:17396690-17432723	con	SY_0.45	279.828	53.4433	-2.38846	5e-05	0.00100478	yes
COTL1	11:17047245-17065341	con	SY_0.45	670.661	127.329	-2.39703	5e-05	0.00100478	yes
ENSGALG00000012593	Z:40166143-40179451	con	SY_0.45	65.3599	12.1199	-2.43102	5e-05	0.00100478	yes
ENSGALG00000041161	22:4596585-4606473	con	SY_0.45	398.445	73.8046	-2.4326	5e-05	0.00100478	yes
CSRP2	1:38237619-38245641	con	SY_0.45	385.429	70.9547	-2.44149	5e-05	0.00100478	yes
ENSGALG00000033420	AADN04000745.1:20-5551	con	SY_0.45	17.8644	3.28008	-2.44529	5e-05	0.00100478	yes
ENSGALG00000008888	4:16915774-17249012	con	SY_0.45	3.56226	0.65364	-2.44623	5e-05	0.00100478	yes
SEBOX	19:5638402-5639026	con	SY_0.45	353.386	64.4637	-2.45469	5e-05	0.00100478	yes
SOSTDC1	2:28464104-28467890	con	SY_0.45	33.0181	5.84015	-2.49918	5e-05	0.00100478	yes
BMPR1B	4:58732963-58968719	con	SY_0.45	5.51335	0.957584	-2.52546	5e-05	0.00100478	yes
GRIN2A	14:9303506-9451731	con	SY_0.45	0.685549	0.118862	-2.52798	5e-05	0.00100478	yes
ENSGALG00000042801	22:4606605-4609137	con	SY_0.45	3.88042	0.664244	-2.54643	5e-05	0.00100478	yes
ENSGALG00000016142	1:108921072-108942022	con	SY_0.45	30.0793	5.12273	-2.55379	5e-05	0.00100478	yes
PLA2G4F	5:25553602-25573229	con	SY_0.45	3.76145	0.639605	-2.55604	5e-05	0.00100478	yes
PTH1R	2:3598939-3705027	con	SY_0.45	1.07267	0.182306	-2.55677	0.0006	0.00877737	yes
NXPH2	7:31593373-31624071	con	SY_0.45	3.36678	0.570411	-2.56129	0.00025	0.00413407	yes
ENSGALG00000028602	13:9493413-9530196	con	SY_0.45	7.82457	1.32023	-2.56722	5e-05	0.00100478	yes
SLBP	4:84514572-84521325	con	SY_0.45	4.5388	0.763745	-2.57115	5e-05	0.00100478	yes
ATP6V0A4	1:56383283-56408305	con	SY_0.45	224.483	36.7028	-2.61264	5e-05	0.00100478	yes
KL	1:174247035-174291621	con	SY_0.45	11.8274	1.92636	-2.61819	5e-05	0.00100478	yes
FKBP5	26:67523-84823	con	SY_0.45	105.595	16.9212	-2.64163	5e-05	0.00100478	yes
ENSGALG00000013575	2:90026992-90030445	con	SY_0.45	142.023	22.1523	-2.68059	5e-05	0.00100478	yes
ENSGALG00000041805	8:7080564-7082231	con	SY_0.45	4.2861	0.650495	-2.72006	5e-05	0.00100478	yes
TNR	8:7030142-7079007	con	SY_0.45	2.51529	0.3761	-2.74154	5e-05	0.00100478	yes
GRM8	1:20929340-21246163	con	SY_0.45	3.16937	0.461659	-2.7793	5e-05	0.00100478	yes
OASL	12:3226394-3228407	con	SY_0.45	107.719	15.4362	-2.80288	5e-05	0.00100478	yes
TNC	17:3145479-3214636	con	SY_0.45	31.58	4.29786	-2.87732	5e-05	0.00100478	yes
ENSGALG00000041739	AADN04024149.1:777-5231	con	SY_0.45	4.2934	0.575742	-2.89863	0.0001	0.00186982	yes
ENPEP	4:58197815-58231230	con	SY_0.45	11.4346	1.52486	-2.90666	5e-05	0.00100478	yes
ENSGALG00000043000	AADN04001516.1:10347-11870	con	SY_0.45	18.9618	2.51157	-2.91644	5e-05	0.00100478	yes
FGB	4:20472455-20478595	con	SY_0.45	301.795	38.9678	-2.95321	5e-05	0.00100478	yes
ENSGALG00000035761	2:22663993-22676382	con	SY_0.45	4.86184	0.606097	-3.00388	5e-05	0.00100478	yes
ENSGALG00000044800	KQ759531.1:6338-38837	con	SY_0.45	30.4026	3.76393	-3.01388	5e-05	0.00100478	yes
UPK1B	1:80776273-80787066	con	SY_0.45	73.0024	8.89249	-3.03729	5e-05	0.00100478	yes
CYP7A1	2:112384149-112391681	con	SY_0.45	6.71973	0.795558	-3.07836	5e-05	0.00100478	yes
SLCO5A1	2:116787852-116850398	con	SY_0.45	3.23256	0.379424	-3.0908	5e-05	0.00100478	yes
ENSGALG00000041965	1:644121-644826	con	SY_0.45	266.332	30.6171	-3.12082	5e-05	0.00100478	yes
ENSGALG00000019276	1:65220691-65266821	con	SY_0.45	39.8034	4.28262	-3.21633	5e-05	0.00100478	yes
TMC3	10:12084066-12101401	con	SY_0.45	3.03031	0.311716	-3.28116	5e-05	0.00100478	yes
ENSGALG00000020575	7:36400377-36402792	con	SY_0.45	3.17506	0.320941	-3.3064	0.0002	0.00339495	yes
ENSGALG00000011727	1:47965221-47968879	con	SY_0.45	1.22855	0.116674	-3.39641	0.0045	0.0456589	yes
ENSGALG00000034899	2:113829128-113995963	con	SY_0.45	0.63336	0.0534413	-3.567	0.00325	0.0350666	yes
ELOVL3	6:16800939-16805324	con	SY_0.45	5.91527	0.47001	-3.65368	5e-05	0.00100478	yes
ENSGALG00000038140	4:25162883-25180520	con	SY_0.45	7.77091	0.615551	-3.65813	5e-05	0.00100478	yes
ENSGALG00000009877	3:22357076-22527887	con	SY_0.45	4.99996	0.390023	-3.68029	5e-05	0.00100478	yes
ENSGALG00000009639	4:25181858-25200923	con	SY_0.45	5.05915	0.389098	-3.70069	5e-05	0.00100478	yes
PIWIL1	15:3348419-3365105	con	SY_0.45	5.94373	0.446396	-3.73497	5e-05	0.00100478	yes
PER2	9:5502474-5526782	con	SY_0.45	112.971	8.23847	-3.77744	5e-05	0.00100478	yes
AKR1D1	1:56602261-56640860	con	SY_0.45	56.1387	3.80736	-3.88213	5e-05	0.00100478	yes
THSD7B	7:31073811-31346787	con	SY_0.45	10.1923	0.625333	-4.02672	5e-05	0.00100478	yes
TMEM132D	15:3525978-3717176	con	SY_0.45	0.964672	0.0549258	-4.13448	5e-05	0.00100478	yes
SLC34A2	4:73916378-73933539	con	SY_0.45	373.821	18.0843	-4.36954	5e-05	0.00100478	yes
CHST4	11:20098882-20100019	con	SY_0.45	14.0748	0.46053	-4.93368	5e-05	0.00100478	yes
ENSGALG00000016483	3:102109980-102119802	con	SY_0.45	8.52377	0.190755	-5.4817	0.0001	0.00186982	yes
DPYS	2:130564106-130592497	con	SY_0.45	15.6471	0.265538	-5.88083	5e-05	0.00100478	yes
ENSGALG00000036980	AADN04001113.1:24490-25275	con	SY_0.45	0.914211	0.0001	-13.1583	5e-05	0.00100478	yes
ENSGALG00000037472	2:89705697-89747827	con	SY_0.45	1.64726	0.0001	-14.0078	0.0038	0.0396332	yes
ENSGALG00000045953	2:55522634-55525785	con	SY_0.45	5.26395	0.0001	-15.6839	0.0016	0.0198253	yes
ENSGALG00000026974	1:56374718-56374886	con	SY_0.45	1984.93	0.0001	-24.2426	0.00045	0.00682822	yes

## Sheet: SY0.15 vs SY0.45
gene	locus	sample_1	sample_2	value_1	value_2	log2(fold_change)	p_value	q_value	significant
ENSGALG00000012869	2:67948050-67955623	SY_0.15	SY_0.45	0.142346	6.96795	5.61326	5e-05	0.00493175	yes
CACNG5	18:7370024-7381626	SY_0.15	SY_0.45	0.408788	3.00871	2.87972	5e-05	0.00493175	yes
ENSGALG00000042870	1:32603424-32604254	SY_0.15	SY_0.45	35.3947	204.461	2.53022	5e-05	0.00493175	yes
CLDN8	1:104409440-104410115	SY_0.15	SY_0.45	3.17912	16.2328	2.35222	5e-05	0.00493175	yes
ENSGALG00000045221	5:45252099-45254363	SY_0.15	SY_0.45	7.38874	34.9572	2.24219	5e-05	0.00493175	yes
CEMIP	10:12248441-12295841	SY_0.15	SY_0.45	0.560801	2.40474	2.10032	5e-05	0.00493175	yes
ENSGALG00000023818	27:5258117-5258992	SY_0.15	SY_0.45	26.6621	107.775	2.01516	5e-05	0.00493175	yes
ENSGALG00000046524	AADN04020224.1:20-2851	SY_0.15	SY_0.45	0.671474	2.53905	1.91889	0.00015	0.0124353	yes
APOLD1	1:48216409-48217150	SY_0.15	SY_0.45	2.03078	7.61156	1.90616	0.0003	0.0213363	yes
THRB	2:37403148-37554300	SY_0.15	SY_0.45	0.473808	1.58171	1.73911	0.0004	0.025739	yes
NRXN3	5:39613133-39992277	SY_0.15	SY_0.45	0.26706	0.882453	1.72436	0.00035	0.0235301	yes
ENSGALG00000010874	5:45257198-45282149	SY_0.15	SY_0.45	14.6693	46.2697	1.65727	5e-05	0.00493175	yes
LZTS1	22:1597119-1599410	SY_0.15	SY_0.45	1.41421	4.43002	1.64731	5e-05	0.00493175	yes
ENSGALG00000007526	4:11347257-11351079	SY_0.15	SY_0.45	2.85404	8.62434	1.59541	5e-05	0.00493175	yes
ATF3	3:21874341-21876244	SY_0.15	SY_0.45	29.3256	87.2896	1.57365	5e-05	0.00493175	yes
ADAMTS17	10:17119377-17282953	SY_0.15	SY_0.45	1.18094	3.44619	1.54506	5e-05	0.00493175	yes
GRIK1	1:104161062-104236516	SY_0.15	SY_0.45	3.19182	9.0998	1.51146	5e-05	0.00493175	yes
SLC6A17	26:1342525-1349149	SY_0.15	SY_0.45	1.17037	3.2248	1.46224	0.00015	0.0124353	yes
MAP2K6	18:8052644-8088396	SY_0.15	SY_0.45	0.848693	2.31332	1.44665	0.00045	0.0278938	yes
ENSGALG00000036437	4:54168181-54195086	SY_0.15	SY_0.45	1.17055	3.16224	1.43375	5e-05	0.00493175	yes
ENSGALG00000041855	AADN04003965.1:9757-13044	SY_0.15	SY_0.45	6.67287	17.891	1.42285	5e-05	0.00493175	yes
NR4A3	2:89674439-89694916	SY_0.15	SY_0.45	19.5546	52.0268	1.41175	5e-05	0.00493175	yes
ARHGAP25	22:300018-316574	SY_0.15	SY_0.45	2.52646	6.69365	1.40567	5e-05	0.00493175	yes
TPPP	2:55779637-55828976	SY_0.15	SY_0.45	3.22304	8.35355	1.37397	5e-05	0.00493175	yes
POMC	3:105815532-105834013	SY_0.15	SY_0.45	17.1737	44.2905	1.3668	5e-05	0.00493175	yes
LIFR	Z:12007503-12048425	SY_0.15	SY_0.45	2.30047	5.91825	1.36324	5e-05	0.00493175	yes
CLSTN2	9:6212444-6381940	SY_0.15	SY_0.45	1.14083	2.92074	1.35625	0.00015	0.0124353	yes
GKN2	22:268676-272038	SY_0.15	SY_0.45	1931.56	4943.18	1.35567	5e-05	0.00493175	yes
ENSGALG00000039430	AADN04008978.1:6646-9662	SY_0.15	SY_0.45	1.72483	4.41211	1.35501	0.0001	0.00919252	yes
FOS	5:38264803-38267713	SY_0.15	SY_0.45	108.516	272.306	1.32731	5e-05	0.00493175	yes
GFRA3	13:18211397-18219351	SY_0.15	SY_0.45	1.76719	4.42861	1.3254	0.0005	0.0291228	yes
ENSGALG00000006469	24:2848178-2865777	SY_0.15	SY_0.45	4.65243	11.4997	1.30554	5e-05	0.00493175	yes
COCH	5:34263827-34280520	SY_0.15	SY_0.45	19.0015	46.4775	1.29042	5e-05	0.00493175	yes
ENSGALG00000030736	AADN04001085.1:2448-12591	SY_0.15	SY_0.45	145.979	356.827	1.28946	5e-05	0.00493175	yes
NPR3	Z:10035885-10086792	SY_0.15	SY_0.45	3.67219	8.96945	1.28838	5e-05	0.00493175	yes
SLC13A5	19:9799045-9813490	SY_0.15	SY_0.45	131.597	319.863	1.28132	5e-05	0.00493175	yes
NELL1	5:2201058-2481132	SY_0.15	SY_0.45	0.962188	2.31345	1.26565	0.0008	0.041739	yes
SLITRK6	1:150234072-150532403	SY_0.15	SY_0.45	1.41907	3.3873	1.25519	0.0004	0.025739	yes
ENSGALG00000037976	AADN04003021.1:11214-18050	SY_0.15	SY_0.45	60.9393	142.85	1.22906	5e-05	0.00493175	yes
ENSGALG00000043669	4:47198236-47232926	SY_0.15	SY_0.45	2.7048	6.28576	1.21657	5e-05	0.00493175	yes
SLC22A15	1:80343673-80374483	SY_0.15	SY_0.45	2.12704	4.92839	1.21227	0.00075	0.0395889	yes
ENSGALG00000035366	AADN04020310.1:27-3000	SY_0.15	SY_0.45	1.60094	3.70448	1.21035	0.00015	0.0124353	yes
NR4A2	7:36220883-36228064	SY_0.15	SY_0.45	4.90326	11.3314	1.20851	5e-05	0.00493175	yes
ENSGALG00000042435	AADN04005436.1:10936-13423	SY_0.15	SY_0.45	77.0027	177.921	1.20826	5e-05	0.00493175	yes
NRTN	28:1518380-1532850	SY_0.15	SY_0.45	1.47544	3.4027	1.20554	0.00065	0.0349938	yes
ENSGALG00000040953	AADN04004349.1:13152-15177	SY_0.15	SY_0.45	16.9566	38.4983	1.18295	5e-05	0.00493175	yes
ENSGALG00000041622	8:21589952-21597979	SY_0.15	SY_0.45	1.49945	3.3901	1.1769	0.00085	0.0435078	yes
RHOJ	5:53490563-53535267	SY_0.15	SY_0.45	2.42007	5.40882	1.16027	0.0005	0.0291228	yes
ENSGALG00000045979	1:101034872-101074782	SY_0.15	SY_0.45	355.938	789.427	1.14918	5e-05	0.00493175	yes
SDC3	23:439986-458290	SY_0.15	SY_0.45	8.62125	19.0383	1.14293	5e-05	0.00493175	yes
GAS7	18:230966-334718	SY_0.15	SY_0.45	1.7223	3.79448	1.13957	0.00055	0.0312275	yes
RHOBTB3	Z:57359527-57387760	SY_0.15	SY_0.45	1.48679	3.24389	1.12552	0.0008	0.041739	yes
ENSGALG00000032940	AADN04012076.1:3432-7475	SY_0.15	SY_0.45	188.676	411.248	1.1241	5e-05	0.00493175	yes
TET1	6:10643047-10718538	SY_0.15	SY_0.45	0.608908	1.3134	1.10901	0.0005	0.0291228	yes
AMER2	1:177160926-177162801	SY_0.15	SY_0.45	11.9389	25.6762	1.10477	5e-05	0.00493175	yes
PTPN14	3:21125848-21184909	SY_0.15	SY_0.45	1.02944	2.21223	1.10365	0.00035	0.0235301	yes
ENSGALG00000015733	3:75720533-75772576	SY_0.15	SY_0.45	0.713587	1.53312	1.10331	5e-05	0.00493175	yes
ARVCF	15:1064141-1189296	SY_0.15	SY_0.45	6.78959	14.5462	1.09925	5e-05	0.00493175	yes
THSD4	10:6291472-6524226	SY_0.15	SY_0.45	4.61303	9.86217	1.09619	5e-05	0.00493175	yes
ENSGALG00000010639	5:43206890-43293003	SY_0.15	SY_0.45	0.7119	1.52196	1.09618	0.0005	0.0291228	yes
VSIG1	4:14173810-14194263	SY_0.15	SY_0.45	43.5373	93.0493	1.09574	5e-05	0.00493175	yes
ENSGALG00000033606	AADN04001852.1:18455-21661	SY_0.15	SY_0.45	3.53316	7.53124	1.09193	0.00025	0.0182608	yes
FGD6	1:45374214-45438791	SY_0.15	SY_0.45	1.42098	3.01866	1.08702	5e-05	0.00493175	yes
SLC4A7	2:38586293-38666471	SY_0.15	SY_0.45	21.7177	45.9766	1.08202	5e-05	0.00493175	yes
CYFIP2	13:11367958-11407960	SY_0.15	SY_0.45	1.0516	2.22287	1.07984	0.00085	0.0435078	yes
LRP11	3:48405550-48422542	SY_0.15	SY_0.45	3.19729	6.73538	1.07491	0.0009	0.0453795	yes
RASGEF1C	13:14051307-14115158	SY_0.15	SY_0.45	1.25211	2.63477	1.07331	0.00075	0.0395889	yes
LNX1	4:66070909-66131999	SY_0.15	SY_0.45	3.48105	7.32457	1.07322	0.00015	0.0124353	yes
ENSGALG00000036033	AADN04003031.1:13691-18004	SY_0.15	SY_0.45	165.463	346.096	1.06466	5e-05	0.00493175	yes
ENSGALG00000031618	AADN04002511.1:12775-14383	SY_0.15	SY_0.45	13.8	28.6349	1.05311	0.0001	0.00919252	yes
ETNK1	1:66507343-66533577	SY_0.15	SY_0.45	32.0289	66.1337	1.04601	5e-05	0.00493175	yes
NBEAL1	7:13734318-13819369	SY_0.15	SY_0.45	7.44566	15.2554	1.03485	5e-05	0.00493175	yes
LPP	9:14391787-14675571	SY_0.15	SY_0.45	2.0223	4.14132	1.03409	0.00025	0.0182608	yes
MLXIP	15:5796665-5813999	SY_0.15	SY_0.45	12.643	25.7747	1.02761	5e-05	0.00493175	yes
LGR5	1:36248568-36332580	SY_0.15	SY_0.45	39.3121	80.025	1.02548	5e-05	0.00493175	yes
FAM26F	3:64018363-64020812	SY_0.15	SY_0.45	4.77453	9.71504	1.02486	0.00065	0.0349938	yes
MBOAT2	3:96358527-96449224	SY_0.15	SY_0.45	2.84267	5.77542	1.02268	0.00015	0.0124353	yes
RXRG	8:5154110-5168109	SY_0.15	SY_0.45	13.8842	28.0971	1.01698	5e-05	0.00493175	yes
DICER1	5:45907274-45950884	SY_0.15	SY_0.45	3.19704	6.41556	1.00484	5e-05	0.00493175	yes
PER2	9:5502474-5526782	SY_0.15	SY_0.45	16.1402	8.06142	-1.00156	5e-05	0.00493175	yes
WNT7A	12:6037840-6069834	SY_0.15	SY_0.45	17.0876	8.52645	-1.00293	0.00015	0.0124353	yes
G0S2	26:3140220-3141106	SY_0.15	SY_0.45	87.9144	43.8665	-1.00298	5e-05	0.00493175	yes
ENSGALG00000032851	2:110860249-110861917	SY_0.15	SY_0.45	103.839	51.7698	-1.00416	5e-05	0.00493175	yes
ENSGALG00000041977	4:17396690-17432723	SY_0.15	SY_0.45	105.05	52.1829	-1.00943	0.00025	0.0182608	yes
IL2RG	4:2403106-2407572	SY_0.15	SY_0.45	9.95959	4.94672	-1.00961	0.00045	0.0278938	yes
HERPUD1	11:661330-665530	SY_0.15	SY_0.45	133.905	66.0644	-1.01926	5e-05	0.00493175	yes
MCM3	3:107998770-108014082	SY_0.15	SY_0.45	5.16471	2.53402	-1.02726	0.00015	0.0124353	yes
ENSGALG00000021395	18:7999196-8020520	SY_0.15	SY_0.45	2.98104	1.4471	-1.04265	0.00025	0.0182608	yes
DRD4	5:520311-526176	SY_0.15	SY_0.45	40.3584	19.4908	-1.05008	5e-05	0.00493175	yes
MARCO	7:28634161-28643201	SY_0.15	SY_0.45	7.96507	3.81296	-1.06278	0.00015	0.0124353	yes
CNGB1	11:510006-519341	SY_0.15	SY_0.45	7.24051	3.44852	-1.07011	5e-05	0.00493175	yes
MPEG1	5:16906935-16909098	SY_0.15	SY_0.45	9.97375	4.71067	-1.0822	5e-05	0.00493175	yes
FGB	4:20472455-20478595	SY_0.15	SY_0.45	81.1959	38.0495	-1.09353	5e-05	0.00493175	yes
RSAD2	3:95406460-95415464	SY_0.15	SY_0.45	1.87388	0.871678	-1.10416	0.00085	0.0435078	yes
CDHR1	6:3035223-3068706	SY_0.15	SY_0.45	2.97195	1.37712	-1.10976	0.0005	0.0291228	yes
ZNFX1	20:6906826-6918959	SY_0.15	SY_0.45	13.3605	6.17065	-1.11448	5e-05	0.00493175	yes
DOCK10	9:8507494-8609908	SY_0.15	SY_0.45	5.10739	2.34426	-1.12345	5e-05	0.00493175	yes
CCNA1	1:172568580-172574262	SY_0.15	SY_0.45	5.84336	2.67096	-1.12944	0.00035	0.0235301	yes
SCG3	10:9089656-9116974	SY_0.15	SY_0.45	2.7661	1.2598	-1.13466	5e-05	0.00493175	yes
PLAU	6:15493643-15501817	SY_0.15	SY_0.45	21.8601	9.88092	-1.14558	5e-05	0.00493175	yes
ENSGALG00000033498	5:15945532-15981209	SY_0.15	SY_0.45	135.023	60.8806	-1.14915	5e-05	0.00493175	yes
STAT1	7:7920233-7940268	SY_0.15	SY_0.45	95.7765	42.692	-1.16571	0.00035	0.0235301	yes
ENSGALG00000039230	AADN04008583.1:82-9890	SY_0.15	SY_0.45	8.06814	3.53217	-1.19168	0.00045	0.0278938	yes
ENSGALG00000013575	2:90026992-90030445	SY_0.15	SY_0.45	49.6946	21.7312	-1.19332	0.00035	0.0235301	yes
NTM	24:1863779-2108022	SY_0.15	SY_0.45	8.7548	3.80301	-1.20293	0.0001	0.00919252	yes
ENSGALG00000028015	9:12963816-12974386	SY_0.15	SY_0.45	152.96	64.3711	-1.24867	5e-05	0.00493175	yes
ENSGALG00000003196	6:9290893-9300707	SY_0.15	SY_0.45	57.0623	23.981	-1.25065	5e-05	0.00493175	yes
ENSGALG00000013057	1:62144163-62154171	SY_0.15	SY_0.45	21.6184	9.07662	-1.25203	5e-05	0.00493175	yes
FKBP5	26:67523-84823	SY_0.15	SY_0.45	39.808	16.532	-1.2678	5e-05	0.00493175	yes
ENSGALG00000033682	AADN04010902.1:3990-7740	SY_0.15	SY_0.45	52.9036	21.4371	-1.30326	0.0001	0.00919252	yes
RPS28	28:874866-875414	SY_0.15	SY_0.45	707.877	281.586	-1.32992	5e-05	0.00493175	yes
CCNO	Z:16730623-16731687	SY_0.15	SY_0.45	9.66071	3.80693	-1.3435	0.00085	0.0435078	yes
ENSGALG00000045085	6:19356960-19360731	SY_0.15	SY_0.45	16.4575	6.36979	-1.36943	5e-05	0.00493175	yes
CHRD	9:15979704-15988790	SY_0.15	SY_0.45	90.9675	34.4019	-1.40286	5e-05	0.00493175	yes
ENSGALG00000023601	3:13782735-13795714	SY_0.15	SY_0.45	26.5373	10.0305	-1.40362	5e-05	0.00493175	yes
ENSGALG00000045115	AADN04004208.1:8263-12247	SY_0.15	SY_0.45	5.78573	2.11159	-1.45417	0.00065	0.0349938	yes
ENSGALG00000016142	1:108921072-108942022	SY_0.15	SY_0.45	13.8275	5.02188	-1.46124	5e-05	0.00493175	yes
ENSGALG00000044536	AADN04001032.1:6805-7358	SY_0.15	SY_0.45	30.7297	11.016	-1.48004	0.0004	0.025739	yes
GREM1	5:30579486-30580185	SY_0.15	SY_0.45	27.1818	9.6624	-1.49219	5e-05	0.00493175	yes
DDIT4	6:11459152-11459905	SY_0.15	SY_0.45	39.3802	13.3138	-1.56455	5e-05	0.00493175	yes
FAIM2	33:1421844-1435440	SY_0.15	SY_0.45	11.5601	3.90533	-1.56564	5e-05	0.00493175	yes
EPSTI1	1:166655213-166707862	SY_0.15	SY_0.45	2.26966	0.745474	-1.60625	0.00025	0.0182608	yes
PENK	2:111735939-111739272	SY_0.15	SY_0.45	605.992	195.746	-1.63032	5e-05	0.00493175	yes
THSD7B	7:31073811-31346787	SY_0.15	SY_0.45	1.89863	0.610078	-1.63789	5e-05	0.00493175	yes
ENSGALG00000044661	28:1271206-1272845	SY_0.15	SY_0.45	7.2621	2.30301	-1.65686	0.00025	0.0182608	yes
ENSGALG00000041965	1:644121-644826	SY_0.15	SY_0.45	101.695	29.9154	-1.76529	0.00015	0.0124353	yes
ENSGALG00000042236	AADN04001811.1:20-20443	SY_0.15	SY_0.45	35.2811	9.95407	-1.82554	5e-05	0.00493175	yes
ANGPTL4	28:838934-846067	SY_0.15	SY_0.45	2.5522	0.713395	-1.83897	0.00035	0.0235301	yes
ENSGALG00000036044	5:278454-291212	SY_0.15	SY_0.45	6.14609	1.68682	-1.86537	5e-05	0.00493175	yes
ENSGALG00000034997	AADN04017342.1:16-3247	SY_0.15	SY_0.45	2.4439	0.656078	-1.89725	0.00035	0.0235301	yes
ENSGALG00000035761	2:22663993-22676382	SY_0.15	SY_0.45	2.24675	0.592467	-1.92303	0.0004	0.025739	yes
RPS27	25:2081231-2081985	SY_0.15	SY_0.45	2340.4	590.933	-1.98569	5e-05	0.00493175	yes
B3GAT2	3:82815249-82837344	SY_0.15	SY_0.45	3.92308	0.976614	-2.00613	5e-05	0.00493175	yes
ENSGALG00000041290	AADN04017652.1:20-4304	SY_0.15	SY_0.45	1.62064	0.397969	-2.02584	5e-05	0.00493175	yes
ENSGALG00000032994	2:110864531-110865865	SY_0.15	SY_0.45	8.15454	1.91095	-2.09332	5e-05	0.00493175	yes
DPYS	2:130564106-130592497	SY_0.15	SY_0.45	1.18682	0.259587	-2.19281	0.0005	0.0291228	yes
OASL	12:3226394-3228407	SY_0.15	SY_0.45	74.3677	15.1196	-2.29825	5e-05	0.00493175	yes
ENSGALG00000045559	Z:70205472-70211427	SY_0.15	SY_0.45	2.53886	0.512994	-2.30717	0.0005	0.0291228	yes
ENSGALG00000038140	4:25162883-25180520	SY_0.15	SY_0.45	3.17037	0.604364	-2.39116	5e-05	0.00493175	yes
ENSGALG00000023622	Z:9164720-9165903	SY_0.15	SY_0.45	19.9858	3.72702	-2.42289	5e-05	0.00493175	yes
ENSGALG00000041805	8:7080564-7082231	SY_0.15	SY_0.45	3.48643	0.635331	-2.45617	5e-05	0.00493175	yes
ENSGALG00000009877	3:22357076-22527887	SY_0.15	SY_0.45	2.10158	0.381174	-2.46295	0.00015	0.0124353	yes
ENSGALG00000043000	AADN04001516.1:10347-11870	SY_0.15	SY_0.45	14.5776	2.44939	-2.57326	5e-05	0.00493175	yes
SLC34A2	4:73916378-73933539	SY_0.15	SY_0.45	114.35	17.6805	-2.69322	5e-05	0.00493175	yes
ENSGALG00000041161	22:4596585-4606473	SY_0.15	SY_0.45	491.116	72.104	-2.76791	5e-05	0.00493175	yes
ENSGALG00000008888	4:16915774-17249012	SY_0.15	SY_0.45	5.46149	0.638514	-3.09651	5e-05	0.00493175	yes
ENSGALG00000042801	22:4606605-4609137	SY_0.15	SY_0.45	6.06075	0.648678	-3.22392	5e-05	0.00493175	yes
UPK1B	1:80776273-80787066	SY_0.15	SY_0.45	81.6262	8.68944	-3.2317	5e-05	0.00493175	yes
CHGA	5:44953315-44963482	SY_0.15	SY_0.45	55.6747	3.72561	-3.90148	5e-05	0.00493175	yes
ENSGALG00000038852	AADN04008185.1:6942-8537	SY_0.15	SY_0.45	3.99712	0.0001	-15.2867	5e-05	0.00493175	yes
CCL5	19:395343-396508	SY_0.15	SY_0.45	16.5529	0.0001	-17.3367	0.00025	0.0182608	yes
