# Supplementary material for: Effects of Selenium Yeast on Egg Quality, Plasma Antioxidants, Selenium Deposition and Eggshell Formation in Aged Laying Hens
Source: Animals (Basel). 2023 Mar 1;13(5):902. doi: 10.3390/ani13050902 (PMC10000209; doi:10.3390/ani13050902)
Supplement: Supplementary file 1 [file animals-13-00902-s001.zip › Supplementary Table S3.xlsx]

## Sheet: GO term(SD vs SY)
Category	Term	Count	PValue	Genes	Fold Enrichment
GOTERM_BP_DIRECT	GO:0007155~cell adhesion	22	0.000399814	HAPLN2, LPP, CNTNAP5, NRXN3, TNC, EFNB2, NEO1, NRXN1, GRHL2, NOV, LAMA2, COL14A1, HES5, SORBS2, TNR, COL6A3, COL12A1, HAS2, NTM, SPP1, CYR61, FN1	2.33109
GOTERM_BP_DIRECT	GO:0007268~chemical synaptic transmission	16	0.000441873	GABRG1, SNAP91, SLC6A11, SLC6A13, SLC6A4, CACNB2, SSTR2, HTR1B, PENK, SSTR1, GLS, SLC18A2, LRP6, UNC13C, HTR1E, DLG1	2.80383
GOTERM_BP_DIRECT	GO:0070372~regulation of ERK1 and ERK2 cascade	6	0.000652892	EPHA7, PKHD1, FRS2, EPHA2, CYR61, FN1	7.45565
GOTERM_BP_DIRECT	GO:0008284~positive regulation of cell proliferation	24	0.000835391	FGFR2, CDC7, ODC1, FGFR3, PKHD1, TNC, EDN2, HCLS1, GAREM1, PTH1R, BTC, LIFR, ROGDI, CNTFR, GREM1, GLI1, T, HIPK1, EREG, PTN, HAS2, AREG, FGF1, DLG1	2.11644
GOTERM_BP_DIRECT	GO:0008285~negative regulation of cell proliferation	23	0.00125659	NOX4, DLC1, TESC, PODN, E2F7, PTH1R, PTPN14, MSX2, RERG, SSTR2, SPRY1, RASSF5, EREG, SSTR1, PTGES, JUN, GATA3, WNT11, RAPGEF2, RBPJ, KLF4, TP53INP1, TOB1	2.09587
GOTERM_BP_DIRECT	GO:0030198~extracellular matrix organization	13	0.00131308	FLRT1, RXFP1, EGFL6, MMP9, SOX9, ABI3BP, NDNF, HPSE, SERPINB5, KAZALD1, TNR, VWA1, CYR61	2.913
GOTERM_BP_DIRECT	GO:0070307~lens fiber cell development	5	0.00155693	WNT7B, WNT5B, BFSP1, FRS2, WNT7A	8.54293
GOTERM_BP_DIRECT	GO:0001525~angiogenesis	16	0.00255787	CAV1, NRXN3, CCDC80, NRXN1, ENPEP, RNF213, NOV, OVOL2, JUN, ITGAV, PLCD1, FGF1, RBPJ, WNT7A, ANGPT4, ANGPTL4	2.37716
GOTERM_BP_DIRECT	GO:0032870~cellular response to hormone stimulus	7	0.0031156	JUN, JUND, AVPR1A, ADRA2A, OXTR, ROBO2, SIK2	4.55623
GOTERM_BP_DIRECT	GO:0030335~positive regulation of cell migration	16	0.00475192	EGFR, WNT5B, PIK3CD, LGR6, SEMA3G, ITGAV, CEMIP, ADRA2A, HAS2, WNT11, HSPA5, FGF1, PLAU, PIK3R1, ATP8A1, CYR61	2.23162
GOTERM_BP_DIRECT	GO:0043627~response to estrogen	6	0.00605211	CAV1, KRT19, GATA3, ZNF366, WNT7A, SLC34A2	4.82424
GOTERM_BP_DIRECT	GO:0042127~regulation of cell proliferation	16	0.00902577	TNFRSF6B, KCNH1, SGK1, SGK3, PTGS2, TNC, CHEK1, GKN2, JUN, JUND, PKD2, PLCD1, TXK, PIAS1, NR5A2, PLAU	2.08285
GOTERM_BP_DIRECT	GO:0045930~negative regulation of mitotic cell cycle	5	0.0156425	BRINP1, TRIM35, PTPN3, SMAD3, DLG1	4.88168
GOTERM_BP_DIRECT	GO:0050678~regulation of epithelial cell proliferation	4	0.0164559	HES5, SERPINB5, SMAD3, FRS2	6.83435
GOTERM_BP_DIRECT	GO:0045599~negative regulation of fat cell differentiation	6	0.0190203	MSX2, GATA2, ENPP1, GATA3, SMAD3, TRIB2	3.72783
GOTERM_BP_DIRECT	GO:0090090~negative regulation of canonical Wnt signaling pathway	11	0.0227145	EGR1, CTHRC1, CAV1, WNT5B, SOSTDC1, FZD1, WNT11, BICC1, SOX9, GREM1, MLLT3	2.24411
GOTERM_BP_DIRECT	GO:0033690~positive regulation of osteoblast proliferation	4	0.0233632	CTHRC1, HPSE, ITGAV, CYR61	6.07497
GOTERM_BP_DIRECT	GO:0045786~negative regulation of cell cycle	4	0.0233632	BRINP1, GMNN, GATA3, HPGD	6.07497
GOTERM_BP_DIRECT	GO:0042346~positive regulation of NF-kappaB import into nucleus	4	0.0233632	C8ORF4, TLR3, EDAR, GREM1	6.07497
GOTERM_BP_DIRECT	GO:0007267~cell-cell signaling	8	0.0241696	LNPEP, NOV, AMH, EREG, NPY, ADRA2A, GREM1, CYR61	2.73374
GOTERM_BP_DIRECT	GO:0097191~extrinsic apoptotic signaling pathway	5	0.0253182	SIVA1, HIPK1, TLR3, SMAD3, G0S2	4.27147
GOTERM_BP_DIRECT	GO:0035987~endodermal cell differentiation	5	0.0253182	LAMB3, MMP9, ITGAV, COL12A1, FN1	4.27147
GOTERM_BP_DIRECT	GO:0045429~positive regulation of nitric oxide biosynthetic process	5	0.0253182	EGFR, PKD2, KLF2, DDAH1, KLF4	4.27147
GOTERM_BP_DIRECT	GO:0007173~epidermal growth factor receptor signaling pathway	7	0.0262612	EGFR, EREG, GAREM1, BTC, PIGR, AREG, SOX9	2.99003
GOTERM_BP_DIRECT	GO:0001558~regulation of cell growth	7	0.0262612	NOV, SGK1, SGK3, KAZALD1, LOC769726, IGFBP1, CYR61	2.99003
GOTERM_BP_DIRECT	GO:0002062~chondrocyte differentiation	6	0.0272197	NOV, WNT5B, PTH1R, SOX9, WNT7A, BMPR1A	3.41717
GOTERM_BP_DIRECT	GO:0030182~neuron differentiation	8	0.0273747	WNT1, WNT7B, WNT5B, HIPK1, WNT11, ITM2C, WNT7A, EPHA2	2.66706
GOTERM_BP_DIRECT	GO:0010518~positive regulation of phospholipase activity	3	0.028951	FGFR2, FGFR3, CYR61	10.2515
GOTERM_BP_DIRECT	GO:0085029~extracellular matrix assembly	3	0.028951	HAPLN2, GPM6B, HAS2	10.2515
GOTERM_BP_DIRECT	GO:0001975~response to amphetamine	4	0.0315976	DRD4, NR4A2, GRIN2A, SLC18A2	5.46748
GOTERM_BP_DIRECT	GO:0030193~regulation of blood coagulation	4	0.0315976	CAV1, ASIC2, TC2N, SCARA5	5.46748
GOTERM_BP_DIRECT	GO:0045165~cell fate commitment	7	0.0344696	WNT1, GATA2, WNT7B, WNT5B, GATA3, WNT11, WNT7A	2.81414
GOTERM_BP_DIRECT	GO:0000122~negative regulation of transcription from RNA polymerase II promoter	29	0.0372357	CAV1, HNF1B, TBX22, TFCP2L1, FST, ZNF366, SOX9, MSX2, GATA2, GATA3, JUND, PER3, TRAF6, CRY1, DLG1, EGR1, FLRT1, HCLS1, NR4A2, SMAD3, MBD3, NR4A3, SALL4, JUN, HOPX, SPDEF, PIAS1, RBPJ, VLDLR	1.46812
GOTERM_BP_DIRECT	GO:0010811~positive regulation of cell-substrate adhesion	5	0.037921	EGFL6, AGR2, NDNF, ABI3BP, CYR61	3.79686
GOTERM_BP_DIRECT	GO:0002076~osteoblast development	4	0.0411413	MSX2, PTHLH, PTH1R, SMAD3	4.97043
GOTERM_BP_DIRECT	GO:0002009~morphogenesis of an epithelium	4	0.0411413	FRAS1, SERPINB5, CA2, SOX9	4.97043
GOTERM_BP_DIRECT	GO:0045669~positive regulation of osteoblast differentiation	7	0.0441719	MSX2, CTHRC1, BMPR1B, SUCO, GDPD2, BMPR1A, CYR61	2.6578
GOTERM_BP_DIRECT	GO:0060395~SMAD protein signal transduction	7	0.0441719	LNPEP, T, FOS, SMAD9, JUN, SMAD3, TGFB1	2.6578
GOTERM_BP_DIRECT	GO:0048469~cell maturation	5	0.0453479	GATA2, HES5, GATA3, PTH1R, BFSP1	3.59702
GOTERM_BP_DIRECT	GO:0051968~positive regulation of synaptic transmission, glutamatergic	3	0.0459382	TNR, NLGN3, NRXN1	8.20122
GOTERM_BP_DIRECT	GO:0051591~response to cAMP	3	0.0459382	CREM, JUN, JUND	8.20122
GOTERM_BP_DIRECT	GO:0010628~positive regulation of gene expression	16	0.0459872	CAV1, TNC, PIK3CD, SLC6A4, BTC, MST1, TLE1, EDAR, GLI1, AMH, ID1, SLC26A9, WNT11, ROBO2, AGR2, FN1	1.70859
GOTERM_BP_DIRECT	GO:0045944~positive regulation of transcription from RNA polymerase II promoter	39	0.0477385	HELZ2, E2F7, CREM, TLR3, SOX9, PHIP, GATA2, FOS, PCGF5, GATA3, JUND, PKD2, TEF, FGF1, TRAF6, PIK3R1, CYR61, EGFR, EGR1, MAFF, NOS1, IKZF2, HCLS1, MET, DMRT2, SMAD3, STAT1, LPIN1, SALL4, HES5, CDON, ZMIZ1, JUN, SPDEF, LRP6, EAF2, NR5A2, BMPR1B, WNT7A	1.34957
GOTERM_BP_DIRECT	GO:0070373~negative regulation of ERK1 and ERK2 cascade	6	0.0495649	DUSP4, SPRY1, ATF3, LMO3, DLG1, DUSP6	2.92901
GOTERM_BP_DIRECT	GO:0045860~positive regulation of protein kinase activity	5	0.0535257	DAB1, EREG, MMD2, VLDLR, CYR61	3.41717
GOTERM_BP_DIRECT	GO:0008104~protein localization	6	0.0564397	TNS4, CAV1, ULK1, GRIP1, GRIN2A, KIF26B	2.82801
GOTERM_BP_DIRECT	GO:0008543~fibroblast growth factor receptor signaling pathway	6	0.0564397	FGFR2, FGFR3, FAT4, KL, FGF1, FRS2	2.82801
GOTERM_BP_DIRECT	GO:0030501~positive regulation of bone mineralization	5	0.0624466	KL, GPM6B, BMPR1B, ANO6, BMPR1A	3.25445
GOTERM_BP_DIRECT	GO:0050679~positive regulation of epithelial cell proliferation	6	0.0638345	EGFR, CYP7B1, NR4A3, FGF1, SOX9, BMPR1A	2.73374
GOTERM_BP_DIRECT	GO:0009887~organ morphogenesis	6	0.0638345	GATA2, GMNN, GATA3, EFNB2, TRAF6, PHLDA2	2.73374
GOTERM_BP_DIRECT	GO:0032332~positive regulation of chondrocyte differentiation	4	0.06399	SOX5, SMAD3, SOX9, BMPR1B	4.20575
GOTERM_BP_DIRECT	GO:0071392~cellular response to estradiol stimulus	4	0.06399	EGFR, MSX2, SSTR2, SSTR1	4.20575
GOTERM_BP_DIRECT	GO:0006699~bile acid biosynthetic process	3	0.0656249	CYP7B1, CYP7A1, AKR1D1	6.83435
GOTERM_BP_DIRECT	GO:0009612~response to mechanical stimulus	3	0.0656249	JUN, JUND, BDKRB1	6.83435
GOTERM_BP_DIRECT	GO:0072178~nephric duct morphogenesis	3	0.0656249	EPHA7, GATA3, EFNB2	6.83435
GOTERM_BP_DIRECT	GO:0050768~negative regulation of neurogenesis	3	0.0656249	BRINP1, WNT7A, BMPR1A	6.83435
GOTERM_BP_DIRECT	GO:0032835~glomerulus development	3	0.0656249	PLCE1, VANGL2, ENPEP	6.83435
GOTERM_BP_DIRECT	GO:0071625~vocalization behavior	3	0.0656249	BRINP1, NLGN3, NRXN1	6.83435
GOTERM_BP_DIRECT	GO:0021517~ventral spinal cord development	3	0.0656249	DAB1, LRP8, VLDLR	6.83435
GOTERM_BP_DIRECT	GO:0071498~cellular response to fluid shear stress	3	0.0656249	PTGS2, PKD2, HAS2	6.83435
GOTERM_BP_DIRECT	GO:0030514~negative regulation of BMP signaling pathway	6	0.0717463	SOSTDC1, SPG20, FZD1, GREM1, CHRD, TOB1	2.64555
GOTERM_BP_DIRECT	GO:0008286~insulin receptor signaling pathway	5	0.0720969	PHIP, CAV2, KL, PDK4, PIK3R1	3.10652
GOTERM_BP_DIRECT	GO:0030513~positive regulation of BMP signaling pathway	5	0.0720969	MSX2, HES5, NEO1, RBPJ, CYR61	3.10652
GOTERM_BP_DIRECT	GO:0035176~social behavior	5	0.0720969	BRINP1, SLC6A4, MSS51, NLGN3, NRXN1	3.10652
GOTERM_BP_DIRECT	GO:0060122~inner ear receptor stereocilium organization	4	0.0771757	CTHRC1, HES5, FAT4, VANGL2	3.90534
GOTERM_BP_DIRECT	GO:0070830~bicellular tight junction assembly	4	0.0771757	MPP7, WNT11, GRHL2, DLG1	3.90534
GOTERM_BP_DIRECT	GO:2001238~positive regulation of extrinsic apoptotic signaling pathway	4	0.0771757	TNFSF10, CAV1, G0S2, ITM2C	3.90534
GOTERM_BP_DIRECT	GO:0007015~actin filament organization	6	0.0801695	PACSIN1, SORBS2, BCAR1, TMSB4X, DBN1, DLG1	2.56288
GOTERM_BP_DIRECT	GO:0072659~protein localization to plasma membrane	6	0.0801695	ZDHHC23, GPR158, DENND4C, LRP6, RAPGEF2, DLG1	2.56288
GOTERM_BP_DIRECT	GO:0035019~somatic stem cell population maintenance	5	0.0824577	GATA2, VANGL2, RBPJ, SOX9, WNT7A	2.97146
GOTERM_BP_DIRECT	GO:0009953~dorsal/ventral pattern formation	5	0.0824577	WNT1, OVOL2, BMPR1B, WNT7A, DUSP6	2.97146
GOTERM_BP_DIRECT	GO:0021915~neural tube development	5	0.0824577	HES5, PKD2, PTN, GRHL2, EPHA2	2.97146
GOTERM_BP_DIRECT	GO:0030857~negative regulation of epithelial cell differentiation	3	0.0875273	CAV1, NKX6-3, SOX9	5.85801
GOTERM_BP_DIRECT	GO:0033628~regulation of cell adhesion mediated by integrin	3	0.0875273	TESC, PLAU, EPHA2	5.85801
GOTERM_BP_DIRECT	GO:0045742~positive regulation of epidermal growth factor receptor signaling pathway	3	0.0875273	MMP9, AFAP1L2, AGR2	5.85801
GOTERM_BP_DIRECT	GO:0060059~embryonic retina morphogenesis in camera-type eye	3	0.0875273	HIPK1, CDON, LRP6	5.85801
GOTERM_BP_DIRECT	GO:0060070~canonical Wnt signaling pathway	8	0.0891813	T, SDC1, LOC395991, FZD1, LRP6, WNT11, WNT7A, KLF4	2.0632
GOTERM_BP_DIRECT	GO:0051897~positive regulation of protein kinase B signaling	7	0.0904506	EGFR, NOX4, F10, HPSE, HCLS1, GATA3, ITSN1	2.22514
GOTERM_BP_DIRECT	GO:0007264~small GTPase mediated signal transduction	17	0.0922422	VAV3, RRAD, GEM, ITSN1, DOCK5, DOCK4, RASL11B, RERG, RAB32, PLCE1, DAB1, RASGRF2, RASL10A, DOCK10, NKIRAS1, RHOF, RHOBTB3	1.51874
GOTERM_CC_DIRECT	GO:0005887~integral component of plasma membrane	76	4.0458e-08	KCNH1, KCNJ16, MCHR2, SLC13A5, SGMS2, SLC6A2, TSPAN4, SLC5A1, SLC6A4, LHCGR, TLR3, TSPAN8, SLC7A5, HTR1B, KCNK5, HTR1E, CDHR1, TRABD2A, SLC7A11, SSTR2, ATP2C2, SLC26A5, GRM8, SSTR1, SLC26A9, HAS2, STEAP2, TNFRSF6B, SLC2A12, FGFR2, CAV2, CAV1, FGFR3, PTH1R, DRD4, RHBG, OXTR, NEO1, ATP12A, ABCA4, KCNJ2, SLC19A2, ESYT3, UPK1B, ADRA2A, PKD2, SLC39A8, SLC4A7, SCNN1G, SCNN1B, FAM26E, TRPC4, OPNVA, SLCO…	1.91274
GOTERM_CC_DIRECT	GO:0005578~proteinaceous extracellular matrix	26	4.35497e-06	ADAMTS18, ADAMTSL1, WNT5B, TNC, COL2A1, CPZ, GPC4, NOV, WNT1, HPSE, SMOC1, TNR, COL6A3, COL12A1, FGF1, FN1, CYR61, COCH, HAPLN2, CCDC80, NDNF, ADAMTS9, WNT7B, COL14A1, WNT11, WNT7A	2.79361
GOTERM_CC_DIRECT	GO:0009986~cell surface	36	2.73841e-05	FGFR2, WNT5B, CLSTN2, ENPP1, TSPEAR, IQGAP2, GREM1, SDC3, LY6E, TNR, ROBO2, HSPA5, NT5E, ANO6, FN1, EGFR, TRPC4, MET, GRIN2A, FZD1, NLGN3, NRXN1, EPHA2, SLC7A11, ADAMTS9, SDC1, SLC26A9, KCNN2, NPTN, LRP6, AREG, VAMP1, MPL, SCARA5, WNT7A, PLAU	2.13072
GOTERM_CC_DIRECT	GO:0005615~extracellular space	68	7.45718e-05	CTHRC1, GLDN, EDN2, MMP9, BTC, FST, TNFSF15, TGFB1, WNT1, SEMA3G, SOSTDC1, COL12A1, FGF1, CFD, VWA1, TSKU, ANGPT4, STC2, SCUBE1, CILP, PIGR, PTHLH, AMH, ADAMTS9, EREG, SERPINB5, SERPINB2, WNT11, PODN, WNT5B, ENPP1, TNC, PLBD1, CHEK1, LRIG3, GREM1, ABI3BP, CPZ, MOV10, COL6A3, C1QTNF2, TFF2, PTN, AVBD10, HSPA5, QSOX1, FN1, THBS4, SPP1, FLRT1, PLA2G15, LGALS3, KL, SOD3, GKN2, WNT7B, TNFSF10, COL14A1…	1.61811
GOTERM_CC_DIRECT	GO:0005614~interstitial matrix	6	0.000954812	FLRT1, TNC, KAZALD1, VWA1, ABI3BP, FN1	6.98403
GOTERM_CC_DIRECT	GO:0016021~integral component of membrane	204	0.00112423	GLDN, ADCY8, LHCGR, BTC, SYT8, FAM171B, CYP7A1, CH25H, MUC13, ISLR2, SLC12A9, CDHR1, PLD5, VANGL2, EFNB2, LIFR, MFSD13A, TMEM132D, CWH43, LHFPL2, CCR8, CCR7, LHFPL5, NPTN, MGAT5, PMP22, ENPP1, PTH1R, BDKRB1, ATP12A, SERINC2, LPCAT1, SLC29A4, TMEM123, EMB, IL1RAPL2, LAPTM4B, GPR158, SPTSSB, SLAMF8, IFI27L2, ATP13A2, SYNE3, CYP7B1, SEMA6B, AREG, CCKAR, MCHR2, GPR162, CDCP2, LNPEP, PTGES, CHST12, MM…	1.20894
GOTERM_CC_DIRECT	GO:0005901~caveola	8	0.00360459	DLC1, CAV2, CAV1, TRPC4, NOS1, LRP6, LRP8, BMPR1A	3.85326
GOTERM_CC_DIRECT	GO:0005886~plasma membrane	96	0.0106617	GLDN, ADCY8, GRIP1, BCAR1, SYT8, TNFSF15, ENPEP, ITSN1, ACTG1, LNPEP, PCDH1, SPG20, GUCY1A3, PIK3AP1, SLC51A, FRS2, NT5E, ANO6, ATP8B3, EGFR, GABRG1, RXFP1, CDHR1, SUCLG1, EFNB2, PIK3CD, EDAR, TC2N, PIGR, DIS3L, GRHL2, SLC34A2, CD83, LHFPL5, PLCE1, STXBP6, CEMIP, CA2, PMP22, DBN1, GPAM, UBAP1, ALPL, FGFR2, FGFR3, SNAP91, ENPP1, ELL, PEAK1, CLDN10, AFAP1L2, ITM2C, TPCN2, PPP1R16B, ZDHHC21, LY6E, F…	1.26503
GOTERM_CC_DIRECT	GO:0009898~cytoplasmic side of plasma membrane	6	0.0174791	ATP2C2, PTPN3, RGS2, GEM, TRAF6, DLG1	3.80947
GOTERM_CC_DIRECT	GO:0016323~basolateral plasma membrane	10	0.0188978	EGFR, CLDN8, TRPC4, SLC26A5, VANGL2, ABCC4, ATP12A, HPGD, DLG1, ATP7B	2.45054
GOTERM_CC_DIRECT	GO:1990454~L-type voltage-gated calcium channel complex	3	0.0277932	CACNB2, CACNA1C, CACNA1D	10.476
GOTERM_CC_DIRECT	GO:0005605~basal lamina	4	0.0298773	COL4A4, LAMA2, DLG1, FN1	5.58722
GOTERM_CC_DIRECT	GO:0005581~collagen trimer	7	0.0314799	C1QA, COL14A1, C1QTNF3, COL6A3, C1QTNF2, COL12A1, COL2A1	2.87578
GOTERM_CC_DIRECT	GO:0005938~cell cortex	9	0.0332982	FGFR2, PARD6A, CAV1, HMCN1, FGB, BFSP1, FGF1, DBN1, ITPR2	2.37193
GOTERM_CC_DIRECT	GO:0005576~extracellular region	29	0.0363111	NRTN, FGF14, PKDCCB, CRHBP, NTN4L, HEP21, NOV, C1QTNF3, PRRG1, AVBD12, LCAT, LOC769726, AVBD10, AVBD11, FGF1, HGFAC, TSKU, F10, UTS2B, C1QA, AMH, PENK, NPY, HPX, AVD, IGFBP1, BMP7, LOC395381, PLAU	1.47299
GOTERM_CC_DIRECT	GO:0043235~receptor complex	11	0.0369795	EGFR, LIFR, ADRA2A, LRP6, NT5DC3, SMAD3, LRP8, PIGR, VIPR1, ITPR2, VLDLR	2.07633
GOTERM_CC_DIRECT	GO:0031012~extracellular matrix	12	0.0390145	FGFR2, COCH, COL14A1, COL21A1, LGALS3, MMP9, CILP, MMP17, COL12A1, SOD3, SPP1, FN1	1.97196
GOTERM_CC_DIRECT	GO:0009897~external side of plasma membrane	12	0.0390145	GPC4, SDC1, CCR7, CD8A, FGB, SCUBE1, ITGAV, ENPEP, SCNN1G, ANXA5, SCNN1B, BMPR1A	1.97196
GOTERM_CC_DIRECT	GO:0044214~spanning component of plasma membrane	3	0.0842878	CD8A, BMPR1B, BMPR1A	5.98631
GOTERM_CC_DIRECT	GO:0043186~P granule	3	0.0842878	CARHSP1, TDRD9, PIWIL1	5.98631
GOTERM_CC_DIRECT	GO:0045121~membrane raft	10	0.0973173	EGFR, CAV2, LDHB, HPSE, GRIP1, TNR, SLC6A4, RFTN2, CAPN2, DLG1	1.81403
GOTERM_MF_DIRECT	GO:0008201~heparin binding	11	0.0220554	NOV, REG4, PTN, FGF1, CHRD, NDNF, ABI3BP, SPP1, THBS4, CYR61, FN1	2.25519
GOTERM_MF_DIRECT	GO:0015280~ligand-gated sodium channel activity	3	0.0278771	ASIC2, SCNN1G, SCNN1B	10.4559
GOTERM_MF_DIRECT	GO:0005328~neurotransmitter:sodium symporter activity	5	0.0292934	SLC6A2, SLC6A11, SLC6A13, SLC6A14, SLC6A17	4.10035
GOTERM_MF_DIRECT	GO:0005109~frizzled binding	5	0.0292934	WNT1, WNT7B, WNT5B, WNT11, WNT7A	4.10035
GOTERM_MF_DIRECT	GO:0017017~MAP kinase tyrosine/serine/threonine phosphatase activity	4	0.0299958	DUSP4, DUSP1, DUSP8, DUSP6	5.57647
GOTERM_MF_DIRECT	GO:0000977~RNA polymerase II regulatory region sequence-specific DNA binding	13	0.0305487	MSX2, EGR1, GATA2, HLF, HNF1B, SOX13, GATA3, E2F7, TEF, RXRG, DMRT2, EAF2, ETV5	1.96995
GOTERM_MF_DIRECT	GO:0008083~growth factor activity	8	0.0315119	NOV, EREG, BTC, PTN, OSGIN1, AREG, FGF1, TGFB1	2.59371
GOTERM_MF_DIRECT	GO:0000987~core promoter proximal region sequence-specific DNA binding	4	0.039098	GATA3, DMRT2, SMAD3, KLF4	5.06952
GOTERM_MF_DIRECT	GO:0004879~RNA polymerase II transcription factor activity, ligand-activated sequence-specific DNA binding	5	0.0503509	NR4A2, RORB, NR4A3, HNF4G, NR5A2	3.48529
GOTERM_MF_DIRECT	GO:0004435~phosphatidylinositol phospholipase C activity	4	0.0735766	PLCE1, PLCH1, PLCD1, PLCB2	3.98319
GOTERM_MF_DIRECT	GO:0005245~voltage-gated calcium channel activity	5	0.0778241	ITGAV, PKD2, CACNG5, CACNA1C, TPCN2	3.03069
GOTERM_MF_DIRECT	GO:0008378~galactosyltransferase activity	3	0.0845267	B3GNT4, B3GNT7, B3GNT2	5.97479
GOTERM_MF_DIRECT	GO:0005154~epidermal growth factor receptor binding	3	0.0845267	EREG, BTC, AREG	5.97479
GOTERM_MF_DIRECT	GO:0004871~signal transducer activity	11	0.0916738	PLCE1, PLK2, KL, BCAR1, PLCH1, RGS7, PLCD1, VOPP1, GNG4, STAT1, PLCB2	1.76268

## Sheet: KEGG(SD vs SY)
Category	Term	Count	PValue	Genes	Fold Enrichment
KEGG_PATHWAY	gga04512:ECM-receptor interaction	15	0.000349759	COL4A4, TNC, ITGA11, COL2A1, LAMA2, LAMB3, SDC1, LAMA3, TNR, ITGAV, COL6A3, LAMC2, SPP1, FN1, THBS4	2.98152
KEGG_PATHWAY	gga04510:Focal adhesion	26	0.000663083	CAV2, CAV1, TNC, BCAR1, ITGA11, COL2A1, ACTG1, LAMB3, TNR, ITGAV, COL6A3, PIK3R5, PIK3R1, FN1, SPP1, THBS4, COL4A4, EGFR, VAV3, PIK3CD, MET, CAPN2, LAMA2, LAMA3, JUN, LAMC2	2.05034
KEGG_PATHWAY	gga00770:Pantothenate and CoA biosynthesis	5	0.0162572	BCAT1, PANK3, ENPP1, GADL1, DPYS	4.83669
KEGG_PATHWAY	gga04010:MAPK signaling pathway	24	0.0170019	EGFR, FGFR2, FGFR3, FGF14, CACNG5, CACNB2, MECOM, DUSP4, FOS, DUSP1, RASGRF2, JUN, PLA2G4F, FGF1, TRAF6, RAPGEF2, CACNA1C, GADD45B, MYC, CACNA1D, DUSP8, MAP2K6, RASA1, DUSP6	1.65043
KEGG_PATHWAY	gga04350:TGF-beta signaling pathway	11	0.0284985	AMH, SMAD9, ID1, FST, SMAD3, ID4, BMP7, BMPR1B, CHRD, MYC, BMPR1A	2.1569
KEGG_PATHWAY	gga05164:Influenza A	15	0.0543215	FXYD2, SOCS3, PIK3CD, TLR3, RSAD2, STAT1, ACTG1, IKBKE, TNFSF10, JUN, PIK3R5, MX1, TMPRSS13, PIK3R1, MAP2K6	1.7004
KEGG_PATHWAY	gga04620:Toll-like receptor signaling pathway	11	0.0562536	IKBKE, FOS, JUN, PIK3CD, TLR3, PIK3R5, TRAF6, STAT1, PIK3R1, MAP2K6, SPP1	1.92302
KEGG_PATHWAY	gga04810:Regulation of actin cytoskeleton	19	0.0582951	EGFR, ARHGEF4, FGFR2, VAV3, FGFR3, FGF14, BCAR1, PIK3CD, PIP5K1B, ITGA11, IQGAP2, BDKRB1, ACTG1, ITGAV, PIK3R5, TMSB4X, FGF1, PIK3R1, FN1	1.55758
KEGG_PATHWAY	gga00533:Glycosaminoglycan biosynthesis - keratan sulfate	4	0.0663643	B3GNT7, CHST4, B3GNT2, CHST1	4.14573
KEGG_PATHWAY	gga00120:Primary bile acid biosynthesis	4	0.0788911	CYP7B1, CYP7A1, CH25H, AKR1D1	3.86935
KEGG_PATHWAY	gga04012:ErbB signaling pathway	10	0.0793368	EGFR, EREG, JUN, PIK3CD, BTC, PIK3R5, AREG, NRG2, MYC, PIK3R1	1.88442
KEGG_PATHWAY	gga04020:Calcium signaling pathway	17	0.0841193	EGFR, GNA14, CCKAR, NOS1, ADORA2A, ADCY8, LHCGR, GRIN2A, OXTR, BDKRB1, ITPR2, PLCE1, AVPR1A, PLCD1, CACNA1C, CACNA1D, PLCB2	1.53212
KEGG_PATHWAY	gga04070:Phosphatidylinositol signaling system	11	0.0923738	PLCE1, PIK3CD, PIP5K1B, PIK3R5, PLCD1, INPP4B, IPMK, PLCB2, PIK3R1, IP6K3, ITPR2	1.75396
KEGG_PATHWAY	gga00100:Steroid biosynthesis	4	0.1067	MSMO1, SQLE, FDFT1, NSDHL	3.41413
KEGG_PATHWAY	gga00590:Arachidonic acid metabolism	7	0.125332	GPX2, CYP2U1, TBXAS1, LTC4SL, PTGS2, PTGES, PLA2G4F	2.03141
KEGG_PATHWAY	gga04060:Cytokine-cytokine receptor interaction	15	0.125942	TNFRSF6B, LIFR, TNFSF15, CNTFR, EDAR, AMH, CCR8, TNFSF10, CCR7, TNFRSF19, BMP7, MPL, IL13RA1, BMPR1B, BMPR1A	1.49076
KEGG_PATHWAY	gga04080:Neuroactive ligand-receptor interaction	24	0.129668	GABRG1, CCKAR, MCHR2, GRIK1, RXFP1, ADORA2A, GRIK4, LHCGR, PTH1R, DRD4, GRIN2A, OXTR, BDKRB1, VIPR1, VIPR2, SSTR2, HTR1B, SSTR1, GRM8, P2RY2, ADRA2A, AVPR1A, CHRNA1, HTR1E	1.32917
KEGG_PATHWAY	gga00532:Glycosaminoglycan biosynthesis - chondroitin sulfate / dermatan sulfate	4	0.137718	CHST12, CHST11, CSGALNACT2, DSE	3.05475
KEGG_PATHWAY	gga00230:Purine metabolism	15	0.141573	ENPP1, ADCY8, PDE10A, PDE4C, LOC427778, PDE7A, RRM2, ADK, ENTPD8, GUCY1A3, PDE9A, PDE8B, ENTPD3, PDE8A, NT5E	1.46075
KEGG_PATHWAY	gga04912:GnRH signaling pathway	9	0.156172	EGFR, ADCY8, JUN, PLA2G4F, CACNA1C, PLCB2, CACNA1D, MAP2K6, ITPR2	1.69598
KEGG_PATHWAY	gga04630:Jak-STAT signaling pathway	12	0.164007	SOCS3, PIK3CD, LIFR, STAM, PIK3R5, CNTFR, PIAS1, STAT1, MPL, IL13RA1, MYC, PIK3R1	1.51409
KEGG_PATHWAY	gga00562:Inositol phosphate metabolism	8	0.183357	PLCE1, PIK3CD, PLCH1, PIP5K1B, PLCD1, INPP4B, IPMK, PLCB2	1.70707
KEGG_PATHWAY	gga00270:Cysteine and methionine metabolism	5	0.187834	LDHB, SRM, MAT1A, CDO1, CBS	2.1985
KEGG_PATHWAY	gga04310:Wnt signaling pathway	12	0.192081	GPC4, WNT7B, WNT5B, JUN, VANGL2, FZD1, LRP6, WNT11, WIF1, PLCB2, WNT7A, MYC	1.4632
KEGG_PATHWAY	gga04068:FoxO signaling pathway	12	0.199423	EGFR, TNFSF10, SGK1, PLK2, SGK3, PIK3CD, SKP2, SMAD3, PIK3R5, GADD45B, KLF2, PIK3R1	1.45101
KEGG_PATHWAY	gga00140:Steroid hormone biosynthesis	5	0.202219	CYP7B1, HSD11B1A, CYP7A1, HSD11B1B, AKR1D1	2.13383
KEGG_PATHWAY	gga04514:Cell adhesion molecules (CAMs)	11	0.213439	CLDN8, SDC1, CD8A, NRXN3, ITGAV, CLDN10, NLGN3, MADCAM1, NEO1, NRXN1, SDC3	1.46432
KEGG_PATHWAY	gga01100:Metabolic pathways	77	0.346535	LDHB, NDST3, PTGS2, SGMS2, PIP5K1B, HLCS, DSE, FDFT1, RDH8, ST3GAL4, HPSE, PTGES, MAT1A, CYP7A1, GADL1, IPMK, NT5E, PLCB2, PDXK, FECH, LTC4SL, PGAP1, SUCLG1, CDO1, LPIN1, PLCE1, PANK3, SQLE, HSD11B1A, ADK, HSD11B1B, RRM2, AKR1B10, INPP4B, MGAT5, GPAM, AKR1D1, PRODH, ALPL, BCAT1, CYP2U1, NDUFB6, ENPP1, SRM, DPYS, CMPK2, ACSBG1, ALDH1A1, LPCAT1, B3GNT4, PLCH1, GALC, ETNK1, PLCD1, RPIA, UCK2, B3GNT2…	1.05503
KEGG_PATHWAY	gga01230:Biosynthesis of amino acids	6	0.353693	BCAT1, SHMT1, MAT1A, RPIA, PSAT1, CBS	1.52738
KEGG_PATHWAY	gga00240:Pyrimidine metabolism	8	0.377882	RRM2, ENTPD8, DPYS, ENTPD3, UCK2, LOC427778, NT5E, CMPK2	1.34977
KEGG_PATHWAY	gga03320:PPAR signaling pathway	6	0.381683	CYP7A1, RXRG, FABP3, ACSL5, ACSBG1, ANGPTL4	1.4756
KEGG_PATHWAY	gga04270:Vascular smooth muscle contraction	9	0.3913	ADCY8, ADORA2A, AVPR1A, PLA2G4F, GUCY1A3, CACNA1C, PLCB2, CACNA1D, ITPR2	1.29298
KEGG_PATHWAY	gga00750:Vitamin B6 metabolism	2	0.392543	PDXK, PSAT1	4.14573
KEGG_PATHWAY	gga04530:Tight junction	7	0.424172	CLDN8, ACTG1, PARD6A, HCLS1, CLDN10, PPP2R2B, TJP2	1.33645
KEGG_PATHWAY	gga00601:Glycosphingolipid biosynthesis - lacto and neolacto series	3	0.428384	B3GNT4, ST3GAL4, B3GNT2	2.07287
KEGG_PATHWAY	gga00600:Sphingolipid metabolism	5	0.43732	SGMS2, SGPP2, GALC, CERK, SMPD3	1.48062
KEGG_PATHWAY	gga04320:Dorso-ventral axis formation	3	0.452324	EGFR, ETV7, PIWIL1	1.97865
KEGG_PATHWAY	gga04540:Gap junction	7	0.461577	EGFR, TUBB, ADCY8, GUCY1A3, PRKG2, PLCB2, ITPR2	1.2857
KEGG_PATHWAY	gga00430:Taurine and hypotaurine metabolism	2	0.47326	GADL1, CDO1	3.22446
KEGG_PATHWAY	gga01130:Biosynthesis of antibiotics	14	0.484224	BCAT1, SHMT1, ODC1, LDHB, MSMO1, SUCLG1, FDFT1, SQLE, GFPT2, RPIA, PSAT1, NSDHL, PRODH, CBS	1.11616
KEGG_PATHWAY	gga00480:Glutathione metabolism	4	0.490153	GPX2, ODC1, SRM, RRM2	1.52738
KEGG_PATHWAY	gga04210:Apoptosis	5	0.498913	TNFSF10, PIK3CD, PIK3R5, CAPN2, PIK3R1	1.36887
KEGG_PATHWAY	gga05168:Herpes simplex infection	11	0.506562	TRAF1, IKBKE, FOS, SOCS3, JUN, PER2, SKP2, TLR3, PER3, TRAF6, STAT1	1.13199
KEGG_PATHWAY	gga00330:Arginine and proline metabolism	4	0.542164	ODC1, NOS1, SRM, PRODH	1.41562
KEGG_PATHWAY	gga04370:VEGF signaling pathway	5	0.557448	PTGS2, PIK3CD, PLA2G4F, PIK3R5, PIK3R1	1.27281
KEGG_PATHWAY	gga00410:beta-Alanine metabolism	3	0.562765	SRM, GADL1, DPYS	1.61223
KEGG_PATHWAY	gga00760:Nicotinate and nicotinamide metabolism	3	0.562765	NADK2, ENPP1, NT5E	1.61223
KEGG_PATHWAY	gga04916:Melanogenesis	7	0.580348	WNT7B, WNT5B, ADCY8, FZD1, WNT11, PLCB2, WNT7A	1.14124
KEGG_PATHWAY	gga00564:Glycerophospholipid metabolism	7	0.580348	PLA2G15, LPCAT1, LCAT, ETNK1, PLA2G4F, LPIN1, GPAM	1.14124
KEGG_PATHWAY	gga00061:Fatty acid biosynthesis	2	0.604024	ACSL5, ACSBG1	2.23232
KEGG_PATHWAY	gga04115:p53 signaling pathway	5	0.612134	SERPINB5, RRM2, CHEK1, GADD45B, SESN3	1.18935
KEGG_PATHWAY	gga00830:Retinol metabolism	3	0.620985	ALDH1A1, RDH8, RDH16	1.45101
KEGG_PATHWAY	gga00980:Metabolism of xenobiotics by cytochrome P450	3	0.639019	HSD11B1A, HSD11B1B, EPHX1	1.4042
KEGG_PATHWAY	gga04142:Lysosome	8	0.639587	LAPTM4B, AP1S2, LAMP3, PLA2G15, GM2A, GALC, ATP6V0A4, CTSH	1.05528
KEGG_PATHWAY	gga04920:Adipocytokine signaling pathway	5	0.650312	NPY, SOCS3, RXRG, ACSL5, ACSBG1	1.1336
KEGG_PATHWAY	gga00220:Arginine biosynthesis	2	0.656711	NOS1, GLS	1.93468
KEGG_PATHWAY	gga04261:Adrenergic signaling in cardiomyocytes	8	0.658527	ADCY8, CREM, CACNG5, CACNB2, PPP2R2B, CACNA1C, PLCB2, CACNA1D	1.03643
KEGG_PATHWAY	gga03018:RNA degradation	5	0.662471	PAN3, DCP2, DIS3L, TOB1, C1D	1.11616
KEGG_PATHWAY	gga04150:mTOR signaling pathway	4	0.664582	ULK1, PIK3CD, PIK3R5, PIK3R1	1.1845
KEGG_PATHWAY	gga04520:Adherens junction	5	0.697209	PTPRB, EGFR, ACTG1, MET, SMAD3	1.06692
KEGG_PATHWAY	gga00040:Pentose and glucuronate interconversions	2	0.702408	KL, AKR1B10	1.70707
KEGG_PATHWAY	gga00260:Glycine, serine and threonine metabolism	3	0.704453	SHMT1, PSAT1, CBS	1.24372
KEGG_PATHWAY	gga00561:Glycerolipid metabolism	4	0.716193	MOGAT1, AKR1B10, LPIN1, GPAM	1.0951
KEGG_PATHWAY	gga02010:ABC transporters	3	0.733303	ABCA8, ABCC4, ABCA4	1.17649
KEGG_PATHWAY	gga04145:Phagosome	8	0.743853	ACTG1, TUBB, NOS1, TFRC, ITGAV, MRC2, ATP6V0A4, THBS4	0.95148
KEGG_PATHWAY	gga04144:Endocytosis	14	0.751286	EGFR, FGFR2, PARD6A, CAV2, CAV1, FGFR3, CHMP4C, PIP5K1B, ASAP2, SMAD3, TFRC, SPG20, STAM, TRAF6	0.927584
KEGG_PATHWAY	gga04914:Progesterone-mediated oocyte maturation	5	0.768101	ADCY8, PIK3CD, PIK3R5, CCNA1, PIK3R1	0.967338
KEGG_PATHWAY	gga04110:Cell cycle	7	0.777804	CDC7, SKP2, SMAD3, CHEK1, GADD45B, CCNA1, MYC	0.923368
KEGG_PATHWAY	gga04260:Cardiac muscle contraction	4	0.791442	CACNG5, CACNB2, CACNA1C, CACNA1D	0.967338
KEGG_PATHWAY	gga04931:Insulin resistance	6	0.799621	SOCS3, PIK3CD, GFPT2, PIK3R5, MLXIP, PIK3R1	0.906879
KEGG_PATHWAY	gga04330:Notch signaling pathway	3	0.816083	HES5, LOC419390, RBPJ	0.989323
KEGG_PATHWAY	gga00534:Glycosaminoglycan biosynthesis - heparan sulfate / heparin	2	0.819594	NDST3, HS6ST2	1.20917
KEGG_PATHWAY	gga00640:Propanoate metabolism	2	0.832055	LDHB, SUCLG1	1.16081
KEGG_PATHWAY	gga00983:Drug metabolism - other enzymes	2	0.843657	DPYS, UCK2	1.11616
KEGG_PATHWAY	gga04672:Intestinal immune network for IgA production	2	0.890727	MADCAM1, PIGR	0.936133
KEGG_PATHWAY	gga00250:Alanine, aspartate and glutamate metabolism	2	0.898287	GLS, GFPT2	0.906879
KEGG_PATHWAY	gga04622:RIG-I-like receptor signaling pathway	3	0.900522	IKBKE, TRAF6, DHX58	0.791458
KEGG_PATHWAY	gga00071:Fatty acid degradation	2	0.905325	ACSL5, ACSBG1	0.879398
KEGG_PATHWAY	gga05132:Salmonella infection	3	0.947687	ACTG1, FOS, JUN	0.659549
KEGG_PATHWAY	gga00565:Ether lipid metabolism	2	0.953827	LPCAT1, PLA2G4F	0.674887
KEGG_PATHWAY	gga01212:Fatty acid metabolism	2	0.95703	ACSL5, ACSBG1	0.659549
KEGG_PATHWAY	gga01200:Carbon metabolism	4	0.965912	SHMT1, SUCLG1, RPIA, PSAT1	0.604586
KEGG_PATHWAY	gga04910:Insulin signaling pathway	4	0.988199	SOCS3, PIK3CD, PIK3R5, PIK3R1	0.504698
KEGG_PATHWAY	gga04120:Ubiquitin mediated proteolysis	4	0.992565	SOCS3, SKP2, PIAS1, TRAF6	0.471872
KEGG_PATHWAY	gga00190:Oxidative phosphorylation	3	0.997576	NDUFB6, ATP6V0A4, ATP12A	0.378523
KEGG_PATHWAY	gga04114:Oocyte meiosis	2	0.99834	ADCY8, ITPR2	0.326069
KEGG_PATHWAY	gga04141:Protein processing in endoplasmic reticulum	3	0.999689	HERPUD1, HSPA5, CAPN2	0.298152

## Sheet: GO term(eggshell strength)
Category	Term	Count	PValue	Genes	Fold Enrichment
GOTERM_BP_DIRECT	GO:0008285~negative regulation of cell proliferation	18	0.00158158	NOX4, DLC1, TESC, PODN, E2F7, PTH1R, PTPN14, MSX2, SSTR2, SPRY1, EREG, PTGES, JUN, GATA3, WNT11, KLF4, TP53INP1, TOB1	2.35137
GOTERM_BP_DIRECT	GO:0070372~regulation of ERK1 and ERK2 cascade	5	0.00164448	EPHA7, PKHD1, EPHA2, CYR61, FN1	8.90671
GOTERM_BP_DIRECT	GO:0007268~chemical synaptic transmission	12	0.00186956	GABRG1, SSTR2, HTR1B, SNAP91, PENK, SLC6A11, GLS, SLC6A13, SLC6A4, UNC13C, DLG1, HTR1E	3.01458
GOTERM_BP_DIRECT	GO:0032870~cellular response to hormone stimulus	6	0.0034572	JUN, JUND, ADRA2A, OXTR, ROBO2, SIK2	5.59851
GOTERM_BP_DIRECT	GO:0030198~extracellular matrix organization	10	0.00347866	FLRT1, RXFP1, EGFL6, SERPINB5, TNR, VWA1, SOX9, NDNF, ABI3BP, CYR61	3.21226
GOTERM_BP_DIRECT	GO:0007267~cell-cell signaling	8	0.003662	NOV, EREG, NPY, ADRA2A, POMC, CCL5, GREM1, CYR61	3.91895
GOTERM_BP_DIRECT	GO:0007155~cell adhesion	15	0.00586196	CNTNAP5, NRXN3, LPP, TNC, GRHL2, LAMA2, NOV, HES5, SORBS2, TNR, HAS2, NTM, SPP1, CYR61, FN1	2.27846
GOTERM_BP_DIRECT	GO:0042346~positive regulation of NF-kappaB import into nucleus	4	0.0087528	C8ORF4, TLR3, EDAR, GREM1	8.70879
GOTERM_BP_DIRECT	GO:0043627~response to estrogen	5	0.0092991	KRT19, GATA3, WNT7A, OVAL, SLC34A2	5.76317
GOTERM_BP_DIRECT	GO:0008284~positive regulation of cell proliferation	16	0.0124099	ODC1, PKHD1, EDN2, TNC, PTH1R, BTC, LIFR, CNTFR, GREM1, T, EREG, PTN, HAS2, AREG, FGF1, DLG1	2.02269
GOTERM_BP_DIRECT	GO:0070373~negative regulation of ERK1 and ERK2 cascade	6	0.0124573	DUSP4, SPRY1, ATF3, LMO3, DLG1, DUSP6	4.19888
GOTERM_BP_DIRECT	GO:0002076~osteoblast development	4	0.0159339	MSX2, PTHLH, PTH1R, SMAD3	7.12537
GOTERM_BP_DIRECT	GO:0042127~regulation of cell proliferation	12	0.0175883	KCNH1, GKN2, SGK1, SGK3, TNC, JUN, JUND, PKD2, PLCD1, NR5A2, LGR5, PLAU	2.2394
GOTERM_BP_DIRECT	GO:0030514~negative regulation of BMP signaling pathway	6	0.0190134	SOSTDC1, SPG20, FZD1, GREM1, CHRD, TOB1	3.79254
GOTERM_BP_DIRECT	GO:0090090~negative regulation of canonical Wnt signaling pathway	9	0.0198479	EGR1, CTHRC1, WNT5B, SOSTDC1, FZD1, WNT11, SOX9, GREM1, MLLT3	2.63213
GOTERM_BP_DIRECT	GO:0001649~osteoblast differentiation	8	0.0227195	TNC, MRC2, ITGA11, WNT11, CHRD, EPHA2, SPP1, CYR61	2.79925
GOTERM_BP_DIRECT	GO:0051591~response to cAMP	3	0.0233513	CREM, JUN, JUND	11.7569
GOTERM_BP_DIRECT	GO:0045599~negative regulation of fat cell differentiation	5	0.0233867	MSX2, GATA2, GATA3, SMAD3, TRIB2	4.45336
GOTERM_BP_DIRECT	GO:0032332~positive regulation of chondrocyte differentiation	4	0.0256072	SOX5, SMAD3, SOX9, BMPR1B	6.02916
GOTERM_BP_DIRECT	GO:0030335~positive regulation of cell migration	11	0.0270638	WNT5B, SEMA3G, ADRA2A, CEMIP, WNT11, HAS2, FGF1, LGR6, PLAU, ATP8A1, CYR61	2.19941
GOTERM_BP_DIRECT	GO:0021915~neural tube development	5	0.0272037	HES5, PKD2, PTN, GRHL2, EPHA2	4.25973
GOTERM_BP_DIRECT	GO:0045165~cell fate commitment	6	0.0275051	GATA2, WNT7B, WNT5B, GATA3, WNT11, WNT7A	3.4579
GOTERM_BP_DIRECT	GO:0002062~chondrocyte differentiation	5	0.031371	NOV, WNT5B, PTH1R, SOX9, WNT7A	4.08224
GOTERM_BP_DIRECT	GO:0045669~positive regulation of osteoblast differentiation	6	0.0343187	MSX2, CTHRC1, BMPR1B, SUCO, GDPD2, CYR61	3.2658
GOTERM_BP_DIRECT	GO:0051965~positive regulation of synapse assembly	6	0.0420919	CLSTN2, NRXN3, ASIC2, LRRN1, NLGN3, SLITRK6	3.09391
GOTERM_BP_DIRECT	GO:0001525~angiogenesis	10	0.0440282	NOV, NRXN3, JUN, PLCD1, ENPEP, FGF1, RNF213, WNT7A, ANGPTL4, ANGPT4	2.12987
GOTERM_BP_DIRECT	GO:0007586~digestion	4	0.0447997	CCKAR, NPY, TFF2, AKR1D1	4.89869
GOTERM_BP_DIRECT	GO:0009888~tissue development	4	0.0447997	GATA2, TNFRSF19, EDAR, NR5A2	4.89869
GOTERM_BP_DIRECT	GO:0033628~regulation of cell adhesion mediated by integrin	3	0.0458266	TESC, PLAU, EPHA2	8.39776
GOTERM_BP_DIRECT	GO:0045668~negative regulation of osteoblast differentiation	5	0.046006	SMAD3, RORB, CHRD, NOCT, TOB1	3.62866
GOTERM_BP_DIRECT	GO:0051607~defense response to virus	7	0.0512984	OASL, DDX60, IFIT5, RSAD2, TLR3, MX1, GPAM	2.58799
GOTERM_BP_DIRECT	GO:0035914~skeletal muscle cell differentiation	5	0.0515975	EGR1, HLF, MAFF, FOS, ATF3	3.49907
GOTERM_BP_DIRECT	GO:2000352~negative regulation of endothelial cell apoptotic process	4	0.052407	FGB, GATA3, NDNF, ANGPTL4	4.61053
GOTERM_BP_DIRECT	GO:0030182~neuron differentiation	6	0.0555907	WNT7B, WNT5B, WNT11, ITM2C, WNT7A, EPHA2	2.86753
GOTERM_BP_DIRECT	GO:0007193~adenylate cyclase-inhibiting G-protein coupled receptor signaling pathway	5	0.0575428	SSTR2, HTR1B, ADCY8, NPR3, HTR1E	3.37841
GOTERM_BP_DIRECT	GO:0000122~negative regulation of transcription from RNA polymerase II promoter	21	0.0589187	EGR1, HNF1B, FLRT1, THRB, TBX22, TFCP2L1, NR4A2, SMAD3, MBD3, NR4A3, SOX9, MSX2, GATA2, JUN, GATA3, JUND, SPDEF, HOPX, PER3, VLDLR, DLG1	1.52404
GOTERM_BP_DIRECT	GO:0050678~regulation of epithelial cell proliferation	3	0.0590814	HES5, SERPINB5, SMAD3	7.34804
GOTERM_BP_DIRECT	GO:0045995~regulation of embryonic development	3	0.0590814	LAMA2, NOCT, PHLDA2	7.34804
GOTERM_BP_DIRECT	GO:0070307~lens fiber cell development	3	0.0590814	WNT7B, WNT5B, WNT7A	7.34804
GOTERM_BP_DIRECT	GO:0048706~embryonic skeletal system development	4	0.0605916	T, MBTD1, DMRT2, WNT11	4.35439
GOTERM_BP_DIRECT	GO:0010811~positive regulation of cell-substrate adhesion	4	0.0605916	EGFL6, NDNF, ABI3BP, CYR61	4.35439
GOTERM_BP_DIRECT	GO:0009887~organ morphogenesis	5	0.0638383	GATA2, THRB, GMNN, GATA3, PHLDA2	3.2658
GOTERM_BP_DIRECT	GO:0048469~cell maturation	4	0.0693325	GATA2, HES5, GATA3, PTH1R	4.12521
GOTERM_BP_DIRECT	GO:0045786~negative regulation of cell cycle	3	0.073461	GMNN, GATA3, HPGD	6.53159
GOTERM_BP_DIRECT	GO:0007173~epidermal growth factor receptor signaling pathway	5	0.0774589	EREG, BTC, PIGR, AREG, SOX9	3.06168
GOTERM_BP_DIRECT	GO:0001558~regulation of cell growth	5	0.0774589	NOV, SGK1, SGK3, IGFBP1, CYR61	3.06168
GOTERM_BP_DIRECT	GO:0045860~positive regulation of protein kinase activity	4	0.0786065	DAB1, EREG, VLDLR, CYR61	3.91895
GOTERM_BP_DIRECT	GO:0006883~cellular sodium ion homeostasis	3	0.088817	SGK1, SGK3, ATP12A	5.87843
GOTERM_BP_DIRECT	GO:0001964~startle response	3	0.088817	PENK, GRIN2A, SLITRK6	5.87843
GOTERM_BP_DIRECT	GO:0001975~response to amphetamine	3	0.088817	DRD4, NR4A2, GRIN2A	5.87843
GOTERM_BP_DIRECT	GO:0006882~cellular zinc ion homeostasis	3	0.088817	SLC39A8, ATP13A2, ATP7B	5.87843
GOTERM_BP_DIRECT	GO:0006874~cellular calcium ion homeostasis	6	0.0956504	STC2, PKHD1, PTH1R, CCL5, ATP13A2, ATP13A5	2.44935
GOTERM_BP_DIRECT	GO:0010454~negative regulation of cell fate commitment	2	0.0992579	SOSTDC1, SPDEF	19.5948
GOTERM_BP_DIRECT	GO:0042663~regulation of endodermal cell fate specification	2	0.0992579	HNF1B, DUSP6	19.5948
GOTERM_BP_DIRECT	GO:1900625~positive regulation of monocyte aggregation	2	0.0992579	HAS2, NR4A3	19.5948
GOTERM_BP_DIRECT	GO:0030208~dermatan sulfate biosynthetic process	2	0.0992579	CHST12, DSE	19.5948
GOTERM_BP_DIRECT	GO:0071470~cellular response to osmotic stress	2	0.0992579	PKD2, SCARA3	19.5948
GOTERM_BP_DIRECT	GO:0007567~parturition	2	0.0992579	RXFP1, HPGD	19.5948
GOTERM_BP_DIRECT	GO:0071603~endothelial cell-cell adhesion	2	0.0992579	NOV, THBS4	19.5948
GOTERM_BP_DIRECT	GO:0045607~regulation of auditory receptor cell differentiation	2	0.0992579	HES5, MYCL	19.5948
GOTERM_BP_DIRECT	GO:0014012~peripheral nervous system axon regeneration	2	0.0992579	TNC, NEFL	19.5948
GOTERM_BP_DIRECT	GO:0090177~establishment of planar polarity involved in neural tube closure	2	0.0992579	CTHRC1, VANGL2	19.5948
GOTERM_BP_DIRECT	GO:2000741~positive regulation of mesenchymal stem cell differentiation	2	0.0992579	SOX5, SOX9	19.5948
GOTERM_BP_DIRECT	GO:0030311~poly-N-acetyllactosamine biosynthetic process	2	0.0992579	B3GNT4, B3GNT2	19.5948
GOTERM_CC_DIRECT	GO:0005887~integral component of plasma membrane	57	8.97004e-08	KCNJ16, KCNH1, MCHR2, SLC13A5, SGMS2, SLC5A1, SLC6A4, TLR3, TSPAN8, SLC7A5, LGR5, HTR1B, KCNK5, HTR1E, CDHR1, SLC7A11, SSTR2, SLC26A5, GRM8, SLC26A9, HAS2, SLITRK6, SLC2A12, DRD4, PTH1R, RHBG, OXTR, ABCA4, KCNJ2, ATP12A, SLC19A2, ESYT3, UPK1B, ADRA2A, PKD2, SLC39A8, SLC4A7, SCNN1G, SCNN1B, FAM26E, SLCO4C1, SLC6A11, KL, SLC6A13, MRC2, SLC6A14, ASIC2, NLGN3, SLC6A17, ATP13A2, ATP13A5, EPHA2, EPHA7,…	2.12527
GOTERM_CC_DIRECT	GO:0005615~extracellular space	50	0.000107005	CTHRC1, GLDN, EDN2, BTC, TNFSF15, TGFB1, OVAL, SEMA3G, SOSTDC1, VWA1, FGF1, TSKU, ANGPT4, STC2, SCUBE1, PIGR, PTHLH, ADAMTS9, EREG, SERPINB5, WNT11, PODN, WNT5B, TNC, PLBD1, CCL5, GREM1, POMC, ABI3BP, CPZ, MOV10, TFF2, PTN, THBS4, FN1, SPP1, FLRT1, KL, SOD3, GKN2, WNT7B, TNFSF10, NPY, FABP3, AREG, LOC395381, CHRD, WNT7A, PLAU, VLDLR	1.76264
GOTERM_CC_DIRECT	GO:0005578~proteinaceous extracellular matrix	18	0.000162135	ADAMTS18, COCH, WNT5B, ADAMTSL1, TNC, COL2A1, NDNF, CPZ, NOV, GPC4, WNT7B, ADAMTS9, TNR, WNT11, FGF1, WNT7A, CYR61, FN1	2.86524
GOTERM_CC_DIRECT	GO:0009986~cell surface	25	0.000434766	WNT5B, CLSTN2, MET, FZD1, GRIN2A, NLGN3, GREM1, EPHA2, SLC7A11, SDC3, SDC1, ADAMTS9, LY6E, TNR, SLC26A9, KCNN2, NPTN, ROBO2, AREG, SLITRK6, VAMP1, WNT7A, ANO6, PLAU, FN1	2.1921
GOTERM_CC_DIRECT	GO:0005614~interstitial matrix	5	0.00193976	FLRT1, TNC, VWA1, ABI3BP, FN1	8.62226
GOTERM_CC_DIRECT	GO:0005605~basal lamina	4	0.0103741	COL4A4, LAMA2, DLG1, FN1	8.27737
GOTERM_CC_DIRECT	GO:0005576~extracellular region	23	0.0134911	NRTN, F10, FGF14, PKDCCB, APOLD1, POMC, NTN4L, OVAL, HEP21, NOV, PENK, NPY, AVBD12, HPX, LCAT, AVD, IGFBP1, BMP7, FGF1, LOC395381, HGFAC, TSKU, PLAU	1.73072
GOTERM_CC_DIRECT	GO:0016323~basolateral plasma membrane	8	0.0190638	CLDN8, SLC26A5, VANGL2, ABCC4, ATP12A, HPGD, DLG1, ATP7B	2.90434
GOTERM_CC_DIRECT	GO:0016021~integral component of membrane	133	0.0264532	GLDN, ADCY8, SLC22A15, BTC, TNFSF15, SYT8, TLR3, ENPEP, VIPR1, DSE, SLC7A5, FDFT1, MARCO, CYP7A1, ELOVL3, SLC25A29, ROBO2, SMIM5, MCOLN2, FLVCR2, SMIM15, CDHR1, VANGL2, LIFR, MFSD13A, APOLD1, TMEM132D, SLC34A2, TMEM106B, LHFPL2, CCR7, LHFPL5, VSIG1, NPTN, SLC25A37, VAMP1, ABCA8, GAL3ST2, PKHD1, PTH1R, ATP12A, LPCAT1, B3GNT4, B3GNT7, TMEM123, ENTPD8, OTOP2, ENTPD3, EMB, B3GNT2, IL1RAPL2, BEAN1, LA…	1.16768
GOTERM_CC_DIRECT	GO:0031225~anchored component of membrane	5	0.0343871	GPC4, ALPL, LY6E, CNTFR, NTM	3.9795
GOTERM_CC_DIRECT	GO:0043186~P granule	3	0.0414785	CARHSP1, TDRD9, PIWIL1	8.86861
GOTERM_CC_DIRECT	GO:0016324~apical plasma membrane	10	0.0663952	LHFPL5, SLC12A2, PKHD1, UPK1B, SLC26A9, VANGL2, CNTFR, ENPEP, SLC34A2, FN1	1.9708
GOTERM_CC_DIRECT	GO:0098793~presynapse	5	0.0791882	NRXN3, SLC6A4, SYT8, SYT15, WNT7A	3.04315
GOTERM_CC_DIRECT	GO:0005667~transcription factor complex	11	0.0897484	GATA2, FOS, HNF1B, CREM, JUN, GATA3, E2F7, JUND, RXRG, SMAD3, NR4A3	1.77834
GOTERM_CC_DIRECT	GO:0097635~extrinsic component of autophagosome membrane	2	0.0941291	WDFY3, ULK1	20.6934
GOTERM_MF_DIRECT	GO:0008201~heparin binding	11	0.00200013	NOV, REG4, PTN, FGF1, CHRD, NDNF, ABI3BP, SPP1, THBS4, CYR61, FN1	3.20227
GOTERM_MF_DIRECT	GO:0008083~growth factor activity	8	0.00524127	NOV, EREG, BTC, PTN, OSGIN1, AREG, FGF1, TGFB1	3.68294
GOTERM_MF_DIRECT	GO:0000977~RNA polymerase II regulatory region sequence-specific DNA binding	12	0.00631772	MSX2, EGR1, HLF, GATA2, HNF1B, SOX13, GATA3, E2F7, RXRG, DMRT2, EAF2, ETV5	2.58206
GOTERM_MF_DIRECT	GO:0017017~MAP kinase tyrosine/serine/threonine phosphatase activity	4	0.0116979	DUSP4, DUSP1, DUSP8, DUSP6	7.91833
GOTERM_MF_DIRECT	GO:0015280~ligand-gated sodium channel activity	3	0.0142082	ASIC2, SCNN1G, SCNN1B	14.8469
GOTERM_MF_DIRECT	GO:0000987~core promoter proximal region sequence-specific DNA binding	4	0.0154916	GATA3, DMRT2, SMAD3, KLF4	7.19848
GOTERM_MF_DIRECT	GO:0003707~steroid hormone receptor activity	6	0.040519	THRB, NR4A2, RXRG, RORB, NR4A3, NR5A2	3.12566
GOTERM_MF_DIRECT	GO:0005154~epidermal growth factor receptor binding	3	0.0449631	EREG, BTC, AREG	8.48392
GOTERM_MF_DIRECT	GO:0008378~galactosyltransferase activity	3	0.0449631	B3GNT4, B3GNT7, B3GNT2	8.48392
GOTERM_MF_DIRECT	GO:0005328~neurotransmitter:sodium symporter activity	4	0.0510731	SLC6A11, SLC6A13, SLC6A14, SLC6A17	4.65784
GOTERM_MF_DIRECT	GO:0005109~frizzled binding	4	0.0510731	WNT7B, WNT5B, WNT11, WNT7A	4.65784
GOTERM_MF_DIRECT	GO:0005543~phospholipid binding	5	0.0618894	WDFY3, PACSIN1, F10, NR5A2, NBEAL1	3.2993
GOTERM_MF_DIRECT	GO:0005184~neuropeptide hormone activity	3	0.0721273	NPY, PENK, POMC	6.59861
GOTERM_MF_DIRECT	GO:0004879~RNA polymerase II transcription factor activity, ligand-activated sequence-specific DNA binding	4	0.0766938	NR4A2, RORB, NR4A3, NR5A2	3.95916
GOTERM_MF_DIRECT	GO:0008532~N-acetyllactosaminide beta-1,3-N-acetylglucosaminyltransferase activity	2	0.0982626	B3GNT4, B3GNT2	19.7958

## Sheet: KEGG(eggshell strength)
Category	Term	Count	PValue	Genes
KEGG_PATHWAY	gga04512:ECM-receptor interaction	12	0.000736131	COL4A4, LAMA2, LAMB3, SDC1, LAMA3, TNR, TNC, ITGA11, COL2A1, SPP1, THBS4, FN1
KEGG_PATHWAY	gga00533:Glycosaminoglycan biosynthesis - keratan sulfate	4	0.0283279	B3GNT7, CHST4, B3GNT2, CHST1
KEGG_PATHWAY	gga00532:Glycosaminoglycan biosynthesis - chondroitin sulfate / dermatan sulfate	4	0.0630692	CHST12, CSGALNACT2, CHST11, DSE
KEGG_PATHWAY	gga04310:Wnt signaling pathway	11	0.0652579	GPC4, WNT7B, WNT5B, JUN, VANGL2, FZD1, WNT11, WIF1, SOX17, WNT7A, MYC
KEGG_PATHWAY	gga04510:Focal adhesion	15	0.0655816	COL4A4, TNC, MET, ITGA11, COL2A1, CAPN2, LAMA2, ACTG1, LAMB3, LAMA3, TNR, JUN, SPP1, FN1, THBS4
KEGG_PATHWAY	gga04080:Neuroactive ligand-receptor interaction	19	0.0890469	GABRG1, CCKAR, MCHR2, THRB, GRIK1, RXFP1, ADORA2A, PTH1R, DRD4, GRIN2A, OXTR, VIPR1, SSTR2, HTR1B, GRM8, P2RY2, ADRA2A, CTSG, HTR1E
KEGG_PATHWAY	gga05164:Influenza A	11	0.0956151	ACTG1, FXYD2, IKBKE, TNFSF10, JUN, RSAD2, TLR3, CCL5, STAT1, MX1, MAP2K6
KEGG_PATHWAY	gga04620:Toll-like receptor signaling pathway	8	0.110699	IKBKE, FOS, JUN, TLR3, CCL5, STAT1, MAP2K6, SPP1
KEGG_PATHWAY	gga04010:MAPK signaling pathway	15	0.15148	FGF14, CACNG5, MECOM, FOS, DUSP4, DUSP1, JUN, PLA2G4F, FGF1, GADD45B, MYC, DUSP8, RASA1, MAP2K6, DUSP6
KEGG_PATHWAY	gga04350:TGF-beta signaling pathway	7	0.153181	ID1, SMAD3, ID4, BMP7, BMPR1B, CHRD, MYC
KEGG_PATHWAY	gga03320:PPAR signaling pathway	6	0.161156	CYP7A1, RXRG, FABP3, ACSL5, ACSBG1, ANGPTL4
KEGG_PATHWAY	gga00770:Pantothenate and CoA biosynthesis	3	0.165538	BCAT1, GADL1, DPYS
KEGG_PATHWAY	gga04060:Cytokine-cytokine receptor interaction	11	0.177448	TNFSF10, CCR7, TNFSF15, LIFR, TNFRSF19, IL2RG, CNTFR, EDAR, BMP7, CCL5, BMPR1B
KEGG_PATHWAY	gga00240:Pyrimidine metabolism	7	0.244841	RRM2, ENTPD8, DPYS, ENTPD3, UCK2, LOC427778, CMPK2
KEGG_PATHWAY	gga04916:Melanogenesis	7	0.269964	WNT7B, WNT5B, ADCY8, FZD1, WNT11, POMC, WNT7A
KEGG_PATHWAY	gga02010:ABC transporters	4	0.271536	ABCA8, ABCA9, ABCC4, ABCA4
KEGG_PATHWAY	gga00750:Vitamin B6 metabolism	2	0.296826	PDXK, PSAT1
KEGG_PATHWAY	gga00230:Purine metabolism	10	0.307238	PDE7A, ADCY8, ADK, RRM2, ENTPD8, ENTPD3, PDE8B, PDE10A, PDE4C, LOC427778
KEGG_PATHWAY	gga04530:Tight junction	6	0.315874	CLDN8, ACTG1, PARD6A, CLDN10, PPP2R2B, TJP2
KEGG_PATHWAY	gga00330:Arginine and proline metabolism	4	0.326038	ODC1, CKMT1A, NOS1, SRM
KEGG_PATHWAY	gga00430:Taurine and hypotaurine metabolism	2	0.364201	GADL1, CDO1
KEGG_PATHWAY	gga04068:FoxO signaling pathway	8	0.374076	TNFSF10, SGK1, PLK2, SGK3, SKP2, SMAD3, GADD45B, KLF2
KEGG_PATHWAY	gga04920:Adipocytokine signaling pathway	5	0.384504	NPY, RXRG, POMC, ACSL5, ACSBG1
KEGG_PATHWAY	gga00410:beta-Alanine metabolism	3	0.38473	SRM, GADL1, DPYS
KEGG_PATHWAY	gga05168:Herpes simplex infection	9	0.387611	IKBKE, FOS, JUN, PER2, SKP2, TLR3, PER3, CCL5, STAT1
KEGG_PATHWAY	gga04145:Phagosome	8	0.390445	ACTG1, MARCO, TUBB, NOS1, TFRC, MRC2, ATP6V0A4, THBS4
KEGG_PATHWAY	gga00564:Glycerophospholipid metabolism	6	0.444201	LPCAT1, LCAT, ETNK1, PLA2G4F, MBOAT2, GPAM
KEGG_PATHWAY	gga00590:Arachidonic acid metabolism	4	0.447218	TBXAS1, LTC4SL, PTGES, PLA2G4F
KEGG_PATHWAY	gga00061:Fatty acid biosynthesis	2	0.480277	ACSL5, ACSBG1
KEGG_PATHWAY	gga00561:Glycerolipid metabolism	4	0.485848	MOGAT1, AKR1B10, MBOAT2, GPAM
KEGG_PATHWAY	gga00270:Cysteine and methionine metabolism	3	0.486549	LDHB, SRM, CDO1
KEGG_PATHWAY	gga00140:Steroid hormone biosynthesis	3	0.502496	CYP7A1, HSD11B1B, AKR1D1
KEGG_PATHWAY	gga04012:ErbB signaling pathway	5	0.52682	EREG, JUN, BTC, AREG, MYC
KEGG_PATHWAY	gga00120:Primary bile acid biosynthesis	2	0.530142	CYP7A1, AKR1D1
KEGG_PATHWAY	gga00220:Arginine biosynthesis	2	0.530142	NOS1, GLS
KEGG_PATHWAY	gga01230:Biosynthesis of amino acids	4	0.535253	BCAT1, SHMT1, RPIA, PSAT1
KEGG_PATHWAY	gga01130:Biosynthesis of antibiotics	10	0.539849	BCAT1, SHMT1, LDHB, ODC1, SUCLG1, GFPT2, RPIA, PSAT1, FDFT1, NSDHL
KEGG_PATHWAY	gga00480:Glutathione metabolism	3	0.563013	ODC1, SRM, RRM2
KEGG_PATHWAY	gga00040:Pentose and glucuronate interconversions	2	0.575243	KL, AKR1B10
KEGG_PATHWAY	gga00100:Steroid biosynthesis	2	0.575243	FDFT1, NSDHL
KEGG_PATHWAY	gga04514:Cell adhesion molecules (CAMs)	6	0.625932	CLDN8, SDC1, NRXN3, CLDN10, NLGN3, SDC3
KEGG_PATHWAY	gga04142:Lysosome	6	0.634064	LAPTM4B, AP1S2, LAMP3, GM2A, ATP6V0A4, CTSG
KEGG_PATHWAY	gga04110:Cell cycle	6	0.634064	SKP2, SMAD3, GADD45B, CCNA1, MCM3, MYC
KEGG_PATHWAY	gga01100:Metabolic pathways	51	0.650164	LDHB, SGMS2, PIP5K1B, HLCS, DSE, FDFT1, PTGES, CYP7A1, GADL1, PDXK, FECH, LTC4SL, SUCLG1, CDO1, HSD11B1B, RRM2, AKR1B10, ADK, GPAM, AKR1D1, BCAT1, ALPL, SRM, DPYS, ACSBG1, CMPK2, ALDH1A1, LPCAT1, B3GNT4, ETNK1, PLCD1, B3GNT2, UCK2, RPIA, BDH1, ACSL5, NSDHL, ODC1, SHMT1, TBXAS1, NOS1, KL, CKMT1A, GLS, GFPT2, CSGALNACT2, ST8SIA5, MBOAT2, PLA2G4F, ATP6V0A4, PSAT1
KEGG_PATHWAY	gga00601:Glycosphingolipid biosynthesis - lacto and neolacto series	2	0.652924	B3GNT4, B3GNT2
KEGG_PATHWAY	gga04020:Calcium signaling pathway	8	0.683925	CCKAR, GNA14, NOS1, ADCY8, ADORA2A, GRIN2A, OXTR, PLCD1
KEGG_PATHWAY	gga00600:Sphingolipid metabolism	3	0.701433	SGMS2, SGPP2, CERK
KEGG_PATHWAY	gga00640:Propanoate metabolism	2	0.716452	LDHB, SUCLG1
KEGG_PATHWAY	gga00983:Drug metabolism - other enzymes	2	0.730435	DPYS, UCK2
KEGG_PATHWAY	gga04912:GnRH signaling pathway	4	0.736922	ADCY8, JUN, PLA2G4F, MAP2K6
KEGG_PATHWAY	gga04810:Regulation of actin cytoskeleton	8	0.774705	ACTG1, FGF14, CYFIP2, PIP5K1B, ITGA11, TMSB4X, FGF1, FN1
KEGG_PATHWAY	gga00980:Metabolism of xenobiotics by cytochrome P450	2	0.790699	HSD11B1B, EPHX1
KEGG_PATHWAY	gga00250:Alanine, aspartate and glutamate metabolism	2	0.801035	GLS, GFPT2
KEGG_PATHWAY	gga04115:p53 signaling pathway	3	0.809008	SERPINB5, RRM2, GADD45B
KEGG_PATHWAY	gga00071:Fatty acid degradation	2	0.810863	ACSL5, ACSBG1
KEGG_PATHWAY	gga04630:Jak-STAT signaling pathway	5	0.824206	LIFR, IL2RG, CNTFR, STAT1, MYC
KEGG_PATHWAY	gga00260:Glycine, serine and threonine metabolism	2	0.829092	SHMT1, PSAT1
KEGG_PATHWAY	gga03018:RNA degradation	3	0.83637	PAN3, DIS3L, TOB1
KEGG_PATHWAY	gga05132:Salmonella infection	3	0.842636	ACTG1, FOS, JUN
KEGG_PATHWAY	gga04520:Adherens junction	3	0.854522	ACTG1, MET, SMAD3
KEGG_PATHWAY	gga01200:Carbon metabolism	4	0.858082	SHMT1, SUCLG1, RPIA, PSAT1
KEGG_PATHWAY	gga04623:Cytosolic DNA-sensing pathway	2	0.867373	IKBKE, CCL5
KEGG_PATHWAY	gga00565:Ether lipid metabolism	2	0.886108	LPCAT1, PLA2G4F
KEGG_PATHWAY	gga04330:Notch signaling pathway	2	0.891748	HES5, LOC419390
KEGG_PATHWAY	gga01212:Fatty acid metabolism	2	0.891748	ACSL5, ACSBG1
KEGG_PATHWAY	gga04540:Gap junction	3	0.906455	TUBB, ADCY8, PRKG2
KEGG_PATHWAY	gga04261:Adrenergic signaling in cardiomyocytes	4	0.919167	ADCY8, CREM, CACNG5, PPP2R2B
KEGG_PATHWAY	gga04210:Apoptosis	2	0.931502	TNFSF10, CAPN2
KEGG_PATHWAY	gga04622:RIG-I-like receptor signaling pathway	2	0.938134	IKBKE, DHX58
KEGG_PATHWAY	gga04270:Vascular smooth muscle contraction	3	0.962828	ADCY8, ADORA2A, PLA2G4F
KEGG_PATHWAY	gga00562:Inositol phosphate metabolism	2	0.968124	PIP5K1B, PLCD1
KEGG_PATHWAY	gga04914:Progesterone-mediated oocyte maturation	2	0.977715	ADCY8, CCNA1
KEGG_PATHWAY	gga04144:Endocytosis	6	0.985798	PARD6A, TFRC, SPG20, PIP5K1B, SMAD3, IL2RG
KEGG_PATHWAY	gga04070:Phosphatidylinositol signaling system	2	0.990189	PIP5K1B, PLCD1
KEGG_PATHWAY	gga04931:Insulin resistance	2	0.992413	GFPT2, MLXIP
KEGG_PATHWAY	gga00190:Oxidative phosphorylation	2	0.997151	ATP12A, ATP6V0A4
KEGG_PATHWAY	gga03013:RNA transport	2	0.998756	CYFIP2, TACC3
KEGG_PATHWAY	gga04141:Protein processing in endoplasmic reticulum	2	0.999429	HERPUD1, CAPN2
