# Supplementary material for: Effects of Selenium Yeast on Egg Quality, Plasma Antioxidants, Selenium Deposition and Eggshell Formation in Aged Laying Hens
Source: Animals (Basel). 2023 Mar 1;13(5):902. doi: 10.3390/ani13050902 (PMC10000209; doi:10.3390/ani13050902)
Supplement: Supplementary file 1 [file animals-13-00902-s001.zip › Supplementary Table S4.xlsx]

## Sheet: Module division
	symbol	ensembl	LocusLinkID	Locus	moduleColor	GS.Selenium_content	p.GS.Selenium_content	MM.magenta	p.MM.magenta	MM.purple	p.MM.purple	MM.green	p.MM.green	MM.white	p.MM.white	MM.darkgreen	p.MM.darkgreen	MM.darkgrey	p.MM.darkgrey	MM.darkred	p.MM.darkred	MM.yellowgreen	p.MM.yellowgreen	MM.grey	p.MM.grey	MM.mediumpurple3	p.MM.mediumpurple3	MM.darkturquoise	p.MM.darkturquoise	MM.turquoise	p.MM.turquoise	MM.orangered4	p.MM.orangered4	MM.pink	p.MM.pink	MM.blue	p.MM.blue	MM.red	p.MM.red	MM.steelblue	p.MM.steelblue	MM.grey60	p.MM.grey60	MM.darkorange	p.MM.darkorange	MM.yellow	p.MM.yellow	MM.lightcyan	p.MM.lightcyan
ENSGALG00000026974	ENSGALG00000026974	NA	NA	NA:NA:NA	black	-0.618399	0.0139957	-0.570287	0.0264313	0.290363	0.29379	-0.514819	0.0495622	-0.0990803	0.725355	0.406598	0.132581	-0.269068	0.33218	-0.24359	0.38165	-0.197274	0.48098	0.0784622	0.781052	0.03718	0.895341	0.434853	0.105259	-0.351117	0.199412	0.105044	0.709466	-0.0743793	0.792209	-0.300484	0.276504	-0.0492105	0.861739	0.323988	0.238774	0.490529	0.0633848	-0.130174	0.643794	-0.0743144	0.792387	0.17317	0.537107
ENSGALG00000003138	ENSGALG00000003138	OXTR	429211	-1:19681376:19684780	black	0.611262	0.0154745	0.504008	0.0554082	-0.489665	0.0639232	0.326407	0.235082	0.48153	0.0691537	-0.353348	0.196374	0.159818	0.569388	0.47613	0.0727922	0.296137	0.283852	-0.405365	0.133874	-0.186267	0.506255	-0.632536	0.0113907	0.402184	0.137246	-0.117379	0.676961	-0.030587	0.913829	-0.0267069	0.92473	0.479402	0.0705718	-0.554119	0.032081	-0.0681465	0.809313	-0.0156289	0.955914	0.231118	0.407234	-0.148055	0.598482
ENSGALG00000020688	ENSGALG00000020688	CYP4A22	771974	1:22223376:22232044	black	-0.593076	0.0197893	-0.497936	0.0589052	0.29901	0.278983	-0.269907	0.330615	-0.325075	0.23711	-0.0721259	0.798383	-0.436366	0.103916	-0.197981	0.479377	-0.291555	0.291721	0.374611	0.16891	0.307184	0.265405	0.537226	0.0389074	-0.118547	0.673911	-0.128509	0.648076	0.267992	0.334192	-0.226783	0.416333	-0.26491	0.339991	0.550336	0.0335248	0.00295049	0.991674	0.374735	0.168758	-0.234873	0.399438	-0.0388691	0.890612
ENSGALG00000006782	ENSGALG00000006782	MRPL46	415499	1:13615877:13618457	black	-0.587167	0.0213729	-0.412282	0.126734	0.153468	0.58502	-0.433217	0.106724	-0.196061	0.483735	0.104568	0.71073	-0.190386	0.496726	-0.127832	0.649822	-0.204366	0.46502	0.192438	0.49201	-0.129935	0.644409	0.440525	0.100289	-0.255992	0.357094	0.0999071	0.723145	0.0622948	0.825444	-0.216557	0.438206	-0.260135	0.349091	0.0291043	0.917993	-0.146128	0.603302	0.275254	0.320745	0.00109769	0.996902	0.376838	0.166188
ENSGALG00000044342	ENSGALG00000044342	HINT3	769579	-1:59825963:59831811	black	-0.581155	0.0230814	-0.662624	0.00710361	0.569498	0.0266883	-0.467251	0.0790708	-0.345369	0.20738	0.353294	0.196447	-0.528327	0.0429113	-0.33788	0.218059	-0.442909	0.0982497	0.148848	0.596502	0.454777	0.0885313	0.490689	0.0632856	-0.234724	0.399747	0.303657	0.271213	0.0212621	0.940046	-0.422399	0.116767	-0.188857	0.500253	0.718785	0.0025328	-0.0796198	0.777896	0.0506887	0.857624	-0.273835	0.323348	0.102607	0.715947
ENSGALG00000045660	ENSGALG00000045660	NA	NA	NA:NA:NA	black	-0.575876	0.0246656	-0.445509	0.0960594	0.34839	0.203167	-0.298936	0.279108	-0.300883	0.275836	0.486412	0.0659794	-0.229484	0.410652	-0.287797	0.298269	-0.180856	0.518902	0.151785	0.589192	-0.109928	0.696536	0.495758	0.0601973	-0.173154	0.537146	0.140519	0.617425	0.00877284	0.975246	-0.128107	0.649112	-0.194096	0.488215	0.113234	0.687829	0.406182	0.133016	-0.144642	0.607031	-0.221296	0.427996	0.396471	0.143448
ENSGALG00000004438	ENSGALG00000004438	ARSB	771459	1:22502339:22568346	black	-0.565097	0.0281556	-0.593522	0.0196735	0.370607	0.173876	-0.466859	0.0793562	-0.180895	0.518812	0.0871343	0.757489	-0.457385	0.0864902	-0.174681	0.533508	-0.359139	0.188627	0.162098	0.563821	0.189225	0.499404	0.602491	0.017454	-0.200806	0.472999	0.00138816	0.996083	0.0164437	0.953618	-0.414799	0.124202	-0.125426	0.656034	0.648521	0.00891719	0.0702879	0.803427	0.0415994	0.882975	-0.148524	0.597311	0.050938	0.856931
ENSGALG00000032316	ENSGALG00000032316	CDV3	420693	1:42576015:42583429	black	-0.56284	0.0289314	-0.421882	0.117263	0.243674	0.381479	-0.263284	0.343075	-0.198975	0.477127	0.174852	0.533101	-0.227429	0.41497	-0.222802	0.424779	-0.0804166	0.775726	0.226309	0.417333	0.0376367	0.894062	0.365479	0.180375	-0.22215	0.426171	-0.0896819	0.750603	0.0724924	0.797378	-0.0911293	0.746698	-0.10599	0.706957	0.196851	0.481939	0.515852	0.0490282	0.109623	0.697343	-0.174129	0.534821	0.0718578	0.799119
ENSGALG00000035023	ENSGALG00000035023	CNIH1	423561	1:56658775:56665015	black	-0.557251	0.0309217	-0.419331	0.119731	0.234463	0.400287	-0.272502	0.325804	-0.421082	0.118033	0.544797	0.0357258	-0.207262	0.458579	-0.346347	0.206009	-0.182581	0.514854	0.05944	0.833337	-0.119854	0.6705	0.520277	0.0467894	-0.186071	0.506711	0.222339	0.425767	-0.0373934	0.894743	-0.0623739	0.825225	-0.310902	0.259365	0.178312	0.524898	0.0130643	0.963143	-0.268399	0.333429	-0.256512	0.356084	0.392393	0.147988
ENSGALG00000035065	ENSGALG00000035065	FAM110B	421134	1:111903414:111904526	black	0.554086	0.0320935	0.540094	0.0376784	-0.311328	0.258677	0.384604	0.156927	0.116908	0.678194	-0.183299	0.513176	0.362903	0.183699	0.284807	0.303542	0.19227	0.492395	-0.156584	0.577328	-0.352441	0.197606	-0.211794	0.448588	0.287353	0.299049	0.227142	0.415575	-0.281312	0.309772	0.247163	0.374484	0.01396	0.960618	-0.453894	0.08923	-0.565955	0.0278647	-0.104518	0.710865	0.16907	0.546935	0.294913	0.285941
ENSGALG00000037177	ENSGALG00000037177	TSNAX	421526	-1:39754269:39776050	black	-0.553499	0.0323145	-0.440261	0.100517	0.435246	0.104909	-0.24513	0.378552	-0.30107	0.275522	0.194917	0.486339	-0.372684	0.171288	-0.151372	0.590217	-0.376726	0.166325	0.312028	0.257551	0.438611	0.101947	0.805365	0.00029082	-0.0267033	0.92474	0.363159	0.183367	0.16109	0.566279	-0.279976	0.312173	-0.243784	0.381258	0.65788	0.00767787	0.0592762	0.833791	0.064208	0.820162	-0.212035	0.44806	0.387987	0.153001
ENSGALG00000029445	ENSGALG00000029445	FADS6	428683	-1:10523477:10528464	black	0.551969	0.0328956	0.475979	0.0728961	-0.423823	0.11541	0.322277	0.241406	0.272347	0.32609	-0.0264882	0.925344	0.282106	0.308351	0.240447	0.388013	0.314232	0.254026	-0.500085	0.0576498	-0.360341	0.187045	-0.754624	0.00114845	0.236286	0.396525	-0.229835	0.409916	-0.0639332	0.82092	0.182799	0.514344	0.289038	0.296097	-0.734132	0.00183215	0.0518844	0.854298	-0.249064	0.3707	0.152921	0.586374	-0.209784	0.453006
ENSGALG00000031180	ENSGALG00000031180	NA	NA	NA:NA:NA	black	-0.545963	0.0352538	-0.403076	0.136294	0.338761	0.216785	-0.239966	0.388993	-0.238782	0.391408	0.204535	0.464644	-0.368081	0.177059	-0.165998	0.554346	-0.217234	0.436739	-0.0775676	0.783494	0.269617	0.331155	0.249534	0.36977	-0.0563214	0.841977	-0.141982	0.613729	0.432701	0.107188	-0.229075	0.411508	-0.073064	0.795812	0.0925626	0.742838	0.434193	0.105848	0.0909849	0.747088	-0.222461	0.425507	0.0304436	0.914232
ENSGALG00000030112	ENSGALG00000030112		NA	-1:113285505:113316802	black	-0.542042	0.0368604	-0.574687	0.0250335	0.5574	0.0308674	-0.405782	0.133435	-0.311399	0.258563	0.0758778	0.78811	-0.383368	0.158376	-0.356969	0.191507	-0.314231	0.254027	0.198951	0.477181	0.175493	0.531577	0.349621	0.201467	-0.312514	0.256771	-0.232888	0.403549	0.199152	0.476728	-0.217025	0.437191	-0.211336	0.449591	0.402073	0.137365	0.139649	0.619627	0.248584	0.371653	-0.235159	0.398849	-0.113411	0.687364
ENSGALG00000010594	ENSGALG00000010594	FEZ2	421472	-1:32364422:32389936	black	-0.535659	0.0395911	-0.422936	0.116255	0.105703	0.707718	-0.302738	0.27274	-0.273096	0.324709	-0.105128	0.709244	-0.26498	0.339859	-0.301912	0.274116	-0.139928	0.618918	0.0752885	0.789722	0.244893	0.379027	0.384437	0.157122	-0.271185	0.32824	-0.153119	0.585884	0.395224	0.144826	-0.0859119	0.760799	-0.182383	0.515318	0.345211	0.207602	-0.189961	0.497705	0.135774	0.629468	-0.188288	0.50157	-0.0866588	0.758776
ENSGALG00000014464	ENSGALG00000014464	MTR	422069	-1:37651044:37698782	black	-0.535397	0.0397064	-0.54204	0.0368609	0.295988	0.284106	-0.319331	0.245982	-0.257433	0.354298	0.0216955	0.938827	-0.421114	0.118003	-0.238966	0.391031	-0.254028	0.360922	0.308741	0.262865	0.270049	0.330351	0.661547	0.00723095	-0.182157	0.515849	0.0222336	0.937312	0.0262319	0.926065	-0.252575	0.36377	-0.168108	0.549251	0.746086	0.00140241	-0.0271727	0.92342	0.11835	0.674425	-0.239476	0.389992	0.0148372	0.958145
ENSGALG00000042148	ENSGALG00000042148	FKBP5	421186	-1:76711:94225	black	-0.534781	0.0399786	-0.499637	0.0579097	0.205531	0.462423	-0.331775	0.227018	-0.198474	0.478259	0.0798296	0.777325	-0.206833	0.459529	-0.286266	0.300962	-0.151913	0.588875	0.357907	0.190258	0.132946	0.636689	0.872872	2.17e-05	-0.303734	0.271086	0.185727	0.507512	-0.0709462	0.80162	-0.110617	0.694719	-0.182889	0.514134	0.665262	0.0067993	0.0564841	0.841526	-0.0655024	0.816593	-0.156601	0.577285	0.305902	0.267508
ENSGALG00000009135	ENSGALG00000009135	PLEKHA3	424128	-1:15386468:15401754	black	-0.532352	0.041064	-0.60649	0.0165286	0.273339	0.324261	-0.479998	0.0701723	-0.18725	0.503974	0.227923	0.41393	-0.447057	0.0947718	-0.270474	0.32956	-0.315136	0.252588	0.171007	0.542283	0.18537	0.508342	0.647225	0.00910042	-0.215466	0.440574	0.288854	0.296419	-0.0713429	0.800531	-0.407693	0.13144	-0.0787889	0.780161	0.736363	0.00174484	-0.157818	0.574294	-0.165334	0.555954	-0.198592	0.477994	0.194847	0.486499
ENSGALG00000013621	ENSGALG00000013621	ATP6V1H	426199	-1:110240177:110289554	black	-0.529156	0.0425259	-0.465968	0.080009	0.416044	0.122963	-0.510732	0.0517162	-0.286261	0.300972	0.134657	0.632317	-0.246584	0.375641	-0.220291	0.430152	-0.418864	0.120186	0.00931972	0.973703	0.0358964	0.898937	0.273222	0.324476	-0.337527	0.218571	0.0283855	0.920012	-0.055912	0.843113	-0.288629	0.296812	-0.287828	0.298216	0.367002	0.178429	-0.0134688	0.962003	-0.112236	0.690453	-0.0396359	0.888466	-0.0172756	0.951274
ENSGALG00000016148	ENSGALG00000016148	C2CD2	418532	-1:110425541:110458812	black	-0.526054	0.043981	-0.372937	0.170976	0.174336	0.534328	-0.296236	0.283683	-0.30859	0.263111	0.0918633	0.744721	-0.299566	0.278046	-0.123884	0.660027	-0.348919	0.202436	0.486406	0.0659829	0.223643	0.422988	0.34074	0.213941	-0.14884	0.596522	0.0646814	0.818857	-0.0459112	0.870935	-0.215001	0.441583	-0.390637	0.149973	0.677353	0.00553305	-0.115426	0.682075	0.225467	0.419114	-0.0792085	0.779017	-0.180317	0.520169
ENSGALG00000004587	ENSGALG00000004587	RC3H1	424439	1:7719525:7758539	black	-0.525548	0.0442219	-0.409203	0.129879	0.073394	0.794907	-0.298442	0.279942	-0.25336	0.36223	0.159696	0.569689	-0.240013	0.388898	-0.187753	0.502807	-0.0940461	0.738848	0.274452	0.322216	-0.115305	0.682391	0.530973	0.0416901	-0.182038	0.516128	0.276261	0.318907	-0.170559	0.543357	-0.147389	0.600145	-0.192869	0.491022	0.253883	0.361207	-0.205439	0.462628	0.113121	0.688126	-0.15386	0.584051	0.392706	0.147636
ENSGALG00000006201	ENSGALG00000006201	TBC1D20	771781	1:9958550:9965786	black	-0.521628	0.046121	-0.524136	0.0448993	0.234894	0.399395	-0.300556	0.276383	-0.154301	0.582959	0.245879	0.377051	-0.314174	0.254118	-0.258107	0.352995	-0.136755	0.626971	0.293273	0.288755	0.0661737	0.814743	0.466672	0.0794928	-0.22182	0.426876	-0.116909	0.67819	-0.0481763	0.86462	-0.179816	0.521349	-0.0620288	0.826179	0.466307	0.0797602	0.645685	0.00932212	-0.0718262	0.799205	-0.203331	0.467332	-0.0164331	0.953648
ENSGALG00000030701	ENSGALG00000030701	IQCC	419646	-1:5310700:5313031	black	-0.518903	0.0474761	-0.246097	0.376614	0.201774	0.470824	-0.0491558	0.861891	-0.392623	0.14773	-0.0285585	0.919526	-0.199629	0.475651	-0.145975	0.603687	-0.229531	0.410552	0.477194	0.0720646	0.300697	0.276147	0.637621	0.0105523	-0.025365	0.928502	0.09936	0.724607	0.141837	0.614094	0.0131625	0.962866	-0.377888	0.164916	0.627925	0.0121949	0.0920588	0.744194	0.0865686	0.75902	-0.213265	0.445367	0.0595504	0.833032
ENSGALG00000037457	ENSGALG00000037457	FOXI3	428801	-1:86075690:86078546	black	-0.516707	0.0485897	-0.196116	0.483609	-0.0346091	0.902545	-0.197351	0.480804	-0.123961	0.659828	0.054702	0.84647	0.0901795	0.74926	-0.0850676	0.763087	-0.10267	0.715779	0.523138	0.0453824	0.240767	0.387363	0.666343	0.00667755	-0.278254	0.315284	0.176006	0.530358	0.0354912	0.900072	0.0780787	0.782099	-0.353684	0.195919	0.547854	0.0344983	0.21955	0.431745	0.0919025	0.744615	0.100607	0.721277	0.133181	0.636088
ENSGALG00000015675	ENSGALG00000015675	ABCC13	418468	1:99421122:99454742	black	-0.516114	0.0488936	-0.332394	0.226099	0.254456	0.360086	-0.166422	0.553322	-0.23003	0.409507	0.0421253	0.881505	-0.325734	0.236106	-0.164146	0.558836	-0.127013	0.651934	0.034755	0.902136	0.527917	0.0431027	0.409533	0.129539	-0.0634918	0.822139	0.112274	0.690353	0.484245	0.0673752	-0.148941	0.59627	-0.0740805	0.793027	0.316329	0.250698	-0.058093	0.837067	0.305716	0.267814	-0.22752	0.414778	0.100694	0.721045
ENSGALG00000004140	ENSGALG00000004140	SH3BP4	424027	1:5812663:5825176	black	-0.512269	0.0508978	-0.418124	0.120911	0.145262	0.605476	-0.276253	0.318922	-0.221494	0.427575	0.510862	0.0516465	-0.258376	0.352475	-0.211602	0.449009	-0.197353	0.480801	0.195355	0.485341	0.065918	0.815448	0.319569	0.24561	-0.17174	0.540527	-0.0247419	0.930255	-0.14452	0.607339	-0.165124	0.556465	-0.189019	0.49988	0.531643	0.041385	0.543495	0.0362588	-0.283411	0.306021	-0.151761	0.589251	-0.158519	0.572572
ENSGALG00000029304	ENSGALG00000029304	SMARCD2	428275	-1:4124013:4130530	black	-0.507031	0.053725	-0.403406	0.135943	0.215708	0.440047	-0.247253	0.374303	-0.437537	0.102886	0.143844	0.609037	-0.16914	0.546767	-0.39823	0.141519	-0.118161	0.674919	0.418916	0.120136	-0.0393907	0.889152	0.442342	0.0987321	-0.296696	0.282901	0.402064	0.137374	-0.261809	0.345885	0.0226523	0.936134	-0.29762	0.281332	0.400948	0.138572	-0.23847	0.392046	-0.0260001	0.926717	-0.271371	0.327896	0.288645	0.296785
ENSGALG00000007381	ENSGALG00000007381		NA	-1:17253818:17261848	black	-0.505261	0.054706	-0.260267	0.348836	0.150547	0.592269	-0.223543	0.4232	-0.391915	0.148527	0.0643066	0.81989	-0.173509	0.536299	-0.15176	0.589254	-0.377967	0.16482	0.353982	0.195516	0.400053	0.139538	0.250319	0.368216	-0.170112	0.544429	0.0510284	0.856679	0.211434	0.449377	-0.084043	0.765867	-0.509292	0.0524911	0.54681	0.0349137	-0.183895	0.511782	0.187551	0.503276	-0.0435027	0.877657	-0.214436	0.442813
ENSGALG00000043405	ENSGALG00000043405	BNIP3L	419522	-1:669570:683049	black	-0.502539	0.0562397	-0.33375	0.224095	0.359796	0.187761	-0.310514	0.259991	-0.207398	0.458278	0.155269	0.580569	-0.236534	0.396017	-0.176667	0.52879	-0.231762	0.405893	0.035183	0.900936	0.186836	0.504934	0.245283	0.378245	-0.166433	0.553294	-0.148634	0.597036	0.449629	0.0926597	-0.167807	0.549976	-0.195525	0.484954	0.0982965	0.72745	0.0197844	0.944207	0.294685	0.286332	-0.0968504	0.731322	0.00803829	0.977318
ENSGALG00000044105	ENSGALG00000044105	NA	NA	NA:NA:NA	black	-0.502288	0.056383	-0.351654	0.198679	-0.0534186	0.850034	-0.215535	0.440422	-0.270167	0.330132	0.146021	0.60357	-0.164423	0.558165	-0.288342	0.297314	0.0252038	0.928956	0.157118	0.576013	0.0784579	0.781064	0.383276	0.158485	-0.26722	0.335639	0.0737564	0.793915	0.00888299	0.974935	0.0263941	0.925609	-0.179588	0.521887	0.356464	0.19218	-0.166752	0.552523	0.0232376	0.934487	-0.191332	0.49455	0.0136699	0.961436
ENSGALG00000006073	ENSGALG00000006073	NDUFAB1	416571	-1:7277376:7279266	black	-0.49465	0.0608628	-0.477335	0.0719688	0.105788	0.707491	-0.284476	0.304128	-0.0716497	0.799689	0.286504	0.300543	-0.290353	0.293806	-0.290634	0.293318	0.0023266	0.993434	0.178079	0.525448	0.266687	0.33664	0.714134	0.00278286	-0.202007	0.4703	0.244268	0.380283	0.116416	0.679482	-0.161289	0.565794	0.0639227	0.82095	0.590317	0.0205172	0.0585036	0.83593	-0.0672081	0.811895	-0.2304	0.408735	0.249771	0.369299
ENSGALG00000013887	ENSGALG00000013887	FAM210A	421045	1:96599127:96616410	black	-0.48461	0.0671384	-0.453196	0.089785	0.0241052	0.932046	-0.317014	0.249617	-0.0757881	0.788355	-0.0605298	0.830322	-0.332438	0.226034	-0.262235	0.345073	-0.0468433	0.868335	0.010146	0.971373	0.24209	0.38468	0.282411	0.307805	-0.209016	0.454699	-0.245105	0.378602	0.528212	0.0429648	-0.186884	0.504822	0.0611916	0.828492	0.211144	0.450013	0.0789553	0.779708	0.148507	0.597353	-0.181875	0.516511	-0.0997833	0.723476
ENSGALG00000008870	ENSGALG00000008870	ZDHHC6	423897	-1:27683963:27693870	black	-0.483104	0.0681184	-0.422727	0.116454	0.134606	0.632447	-0.400389	0.139174	-0.160504	0.567711	0.497434	0.059201	-0.20878	0.45522	-0.21047	0.451495	-0.247472	0.373867	0.112149	0.690683	-0.134831	0.631872	0.215422	0.440668	-0.240625	0.387651	-0.183968	0.511611	-0.0349587	0.901565	-0.211582	0.449053	-0.223225	0.423877	0.291462	0.291882	0.401484	0.137996	-0.232443	0.404474	-0.0403409	0.886494	-0.14001	0.618713
ENSGALG00000034788	ENSGALG00000034788	PHLDA1	NA	-1:38018609:38025170	black	-0.482159	0.068739	-0.456974	0.0868092	0.153815	0.584162	-0.351612	0.198736	-0.291013	0.292661	-0.0124314	0.964928	-0.29454	0.28658	-0.228469	0.412781	-0.143412	0.610125	0.140155	0.618344	-0.307383	0.265079	0.406862	0.132306	-0.20303	0.468007	0.088144	0.754758	-0.179518	0.522052	-0.190483	0.496503	-0.155674	0.579571	0.0957872	0.734173	-0.218976	0.43298	0.0326329	0.908087	-0.196617	0.482471	0.339594	0.215586
ENSGALG00000014794	ENSGALG00000014794	GDAP2	425913	1:79906673:79928553	black	-0.481347	0.069275	-0.483496	0.0678628	0.225622	0.418786	-0.0823809	0.770381	-0.323718	0.239188	0.150125	0.59332	-0.41523	0.123772	-0.311584	0.258265	-0.0521939	0.853438	0.29311	0.289036	0.0842366	0.765341	0.459469	0.0848831	-0.0595324	0.833082	-0.204952	0.463713	0.027587	0.922256	-0.0632258	0.822873	-0.0663761	0.814186	0.440691	0.100146	0.53824	0.0384695	-0.0144752	0.959166	-0.428365	0.111151	-0.0577581	0.837995
ENSGALG00000004009	ENSGALG00000004009	DHRS13	100858939	-1:6026937:6029799	black	0.480447	0.0698727	0.493861	0.0613401	0.0156542	0.955842	0.492902	0.0619238	0.0900494	0.749611	-0.111469	0.692474	0.220151	0.430452	0.237292	0.39446	0.143758	0.609253	0.0604006	0.83068	0.00875023	0.97531	-0.413589	0.125414	0.384349	0.157225	0.1421	0.613432	-0.0788573	0.779975	0.224763	0.420606	0.127049	0.651841	-0.34571	0.206901	0.205985	0.461415	0.0582741	0.836566	0.011475	0.967625	0.0310725	0.912466
ENSGALG00000034709	ENSGALG00000034709		NA	-1:28669625:28751964	black	0.476702	0.0724006	0.31125	0.258804	-0.145564	0.604718	0.479866	0.0702612	0.086975	0.75792	-0.449312	0.0929178	0.0719733	0.798802	0.0583134	0.836457	0.332153	0.226457	0.191211	0.494826	-0.0121124	0.965827	-0.2761	0.319201	0.274026	0.322998	0.0829566	0.768817	-0.194205	0.487966	0.256765	0.355593	0.301377	0.275009	-0.0841738	0.765512	-0.0777595	0.78297	0.120599	0.66856	-0.180202	0.52044	-0.0659758	0.815289
ENSGALG00000012538	ENSGALG00000012538	NR4A2	424320	-1:36032926:36038300	black	0.471689	0.0758861	0.638016	0.0104892	-0.226078	0.417823	0.16951	0.545877	0.258995	0.351282	-0.0432004	0.878501	0.389507	0.151259	0.634262	0.0111005	-0.215327	0.440875	-0.3516	0.198752	-0.15556	0.579852	-0.551734	0.0329856	0.35519	0.193888	0.128797	0.647336	-0.10011	0.722604	-0.0815898	0.772533	-0.131839	0.639523	-0.523442	0.0452351	-0.154505	0.582455	-0.156772	0.576864	0.559726	0.0300277	0.0174581	0.950759
ENSGALG00000009698	ENSGALG00000009698	SLC38A1	417806	-1:31057372:31082708	black	-0.471464	0.0760457	-0.375353	0.168	0.173989	0.535155	-0.208796	0.455185	-0.142992	0.611182	0.266623	0.336761	-0.227916	0.413944	-0.135293	0.630694	-0.13536	0.630524	0.365921	0.179809	0.100394	0.721846	0.373118	0.170752	-0.149445	0.595012	-0.0973866	0.729886	-0.0996938	0.723715	-0.125378	0.656156	-0.146461	0.602469	0.480386	0.0699135	0.620056	0.0136686	0.0243842	0.931261	-0.116225	0.679982	-0.113922	0.686021
ENSGALG00000044239	ENSGALG00000044239	NA	NA	NA:NA:NA	black	-0.471314	0.0761516	-0.484773	0.0670331	0.205441	0.462624	-0.572714	0.0256533	-0.0117467	0.966858	0.121389	0.666505	-0.183227	0.513343	-0.118471	0.674109	-0.347494	0.204412	0.192579	0.491687	0.00717354	0.979758	0.471217	0.0762207	-0.393577	0.14666	-0.157479	0.575125	-0.0858314	0.761017	-0.331117	0.227997	-0.2242	0.421803	0.579135	0.0236781	0.105538	0.708156	-0.019849	0.944025	0.143211	0.61063	-0.119468	0.671506
ENSGALG00000042021	ENSGALG00000042021	NA	NA	NA:NA:NA	black	-0.469567	0.0773974	-0.374395	0.169175	0.227816	0.414154	-0.175792	0.530867	-0.111165	0.693274	0.150202	0.593126	-0.132312	0.638311	-0.299813	0.277631	0.0762275	0.787154	0.0640923	0.820481	0.268841	0.332603	0.518553	0.0476524	-0.241268	0.386345	0.117596	0.676394	0.334022	0.223694	0.0168164	0.952568	0.0590172	0.834508	0.0561018	0.842586	0.416236	0.122772	0.104701	0.710379	-0.212677	0.446653	0.383983	0.157654
ENSGALG00000035296	ENSGALG00000035296	NA	NA	NA:NA:NA	black	-0.46858	0.078107	-0.374997	0.168436	0.189293	0.499246	-0.171968	0.539982	-0.175044	0.532644	0.187678	0.502982	-0.191691	0.493724	-0.176734	0.52863	-0.13386	0.634351	0.407581	0.131557	0.135777	0.62946	0.500555	0.0573774	-0.161549	0.565158	-0.0489353	0.862505	-0.0720879	0.798488	-0.0666842	0.813337	-0.161708	0.564772	0.513855	0.050064	0.664399	0.00689767	-0.0519372	0.854152	-0.146216	0.603082	-0.011391	0.967862
ENSGALG00000013183	ENSGALG00000013183	TERT	420972	-1:85742908:85772374	black	0.467967	0.0785508	0.187938	0.502379	-0.250246	0.368359	0.128633	0.647757	0.413485	0.12552	0.11154	0.692286	0.0705717	0.802648	0.0761805	0.787283	0.399741	0.139876	-0.35225	0.197866	-0.158519	0.572573	-0.524725	0.0446159	0.100894	0.720512	0.0805495	0.775364	-0.118664	0.673605	-0.0075435	0.978714	0.550733	0.033371	-0.456876	0.0868856	-0.151993	0.588675	0.0251572	0.929087	0.0375139	0.894406	2.74e-05	0.999923
ENSGALG00000043301	ENSGALG00000043301	NA	NA	NA:NA:NA	black	-0.466777	0.0794161	-0.395272	0.144772	0.138544	0.622426	-0.36398	0.182305	-0.242417	0.384018	0.262341	0.34487	-0.209314	0.454042	-0.247693	0.373427	-0.168277	0.548844	0.0351066	0.90115	-0.222878	0.424617	0.421962	0.117187	-0.203485	0.466987	0.187063	0.504407	-0.10963	0.697324	-0.175288	0.532063	-0.153805	0.584187	0.197542	0.480372	-0.125592	0.655605	-0.264518	0.340734	-0.14824	0.59802	0.305324	0.268459
ENSGALG00000022149	ENSGALG00000022149	NA	NA	NA:NA:NA	black	-0.466498	0.0796202	-0.257431	0.354302	0.289955	0.294498	-0.146853	0.601488	-0.177449	0.526937	-0.24023	0.388455	-0.254446	0.360105	-0.10848	0.700364	-0.224489	0.421188	0.243256	0.382323	0.618306	0.0140142	0.418375	0.120664	-0.0576017	0.838428	-0.0712325	0.800834	0.706624	0.00322795	-0.120998	0.66752	-0.156114	0.578486	0.376081	0.16711	-0.00100502	0.997164	0.470473	0.0767494	-0.124043	0.659615	-0.0314622	0.911372
ENSGALG00000012608	ENSGALG00000012608	DAPK1	431670	1:41291902:41388905	black	-0.466251	0.0798016	-0.460453	0.0841324	0.356641	0.191944	-0.319538	0.245659	-0.372691	0.17128	-0.00438675	0.987621	-0.323556	0.239437	-0.23612	0.396867	-0.249616	0.369606	0.212293	0.447494	-0.154224	0.58315	0.466092	0.0799181	-0.176512	0.529158	0.236941	0.395179	-0.252109	0.364686	-0.207035	0.459082	-0.219506	0.431839	0.247541	0.37373	-0.226363	0.41722	0.0594285	0.833369	-0.236705	0.395664	0.383176	0.158603
ENSGALG00000004190	ENSGALG00000004190	RNF34	416843	1:5762337:5771346	black	0.464455	0.0811252	0.307177	0.265417	0.128585	0.647882	0.181615	0.51712	0.132042	0.639003	0.121621	0.665901	0.351484	0.198911	0.0410213	0.884591	0.0572979	0.83927	-0.155187	0.580772	-0.158562	0.572467	-0.306338	0.266792	-0.0065049	0.981644	-0.0133524	0.962331	-0.189783	0.498115	0.217039	0.437162	0.014103	0.960215	-0.328677	0.231651	0.100697	0.721038	-0.163668	0.559999	0.160669	0.567306	0.0182895	0.948417
ENSGALG00000037379	ENSGALG00000037379	NA	NA	NA:NA:NA	black	0.463855	0.0815708	0.435855	0.104369	-0.289233	0.295757	0.306582	0.266391	0.100059	0.72274	-0.000147762	0.999583	0.372615	0.171374	0.175586	0.531354	0.290272	0.293947	-0.339794	0.215298	-0.613829	0.0149295	-0.484785	0.0670252	0.133125	0.63623	-0.130213	0.643694	-0.368322	0.176753	0.303772	0.271023	0.0712335	0.800831	-0.740344	0.00159731	-0.0305932	0.913812	-0.237721	0.393579	0.131502	0.640386	0.0669462	0.812616
ENSGALG00000011190	ENSGALG00000011190	PLACL2	100857411	-1:46423727:46424857	black	-0.456308	0.0873289	-0.430721	0.108986	0.0959755	0.733668	-0.294993	0.285804	-0.0842147	0.765401	0.0286261	0.919336	-0.196879	0.481876	-0.208668	0.455467	-0.081975	0.771485	0.267026	0.336004	0.140607	0.617202	0.736956	0.00172217	-0.266973	0.336102	-0.0424064	0.88072	0.0197604	0.944275	-0.10837	0.700654	-0.103275	0.714169	0.646667	0.00918033	0.079254	0.778893	-0.00437464	0.987655	-0.103078	0.714692	0.0621451	0.825857
ENSGALG00000037682	ENSGALG00000037682	CCSER2	423606	1:1634831:1751717	black	-0.455981	0.0875847	-0.524913	0.0445257	0.234403	0.400411	-0.368806	0.176142	-0.242222	0.384413	0.296464	0.283295	-0.352344	0.197737	-0.22856	0.412591	-0.294412	0.286799	0.0757739	0.788394	0.0531879	0.850675	0.619882	0.0137026	-0.201194	0.472127	0.054811	0.846168	-0.229089	0.411479	-0.280701	0.310869	-0.186724	0.505194	0.704466	0.00336579	0.0552991	0.844813	-0.321633	0.242402	-0.177527	0.526753	0.0412232	0.884027
ENSGALG00000044385	ENSGALG00000044385	NA	NA	NA:NA:NA	black	-0.453861	0.089256	-0.370092	0.174523	0.129216	0.646257	-0.204043	0.46574	-0.116525	0.679196	-0.0100367	0.971681	-0.224607	0.42094	-0.13192	0.639314	-0.145396	0.605139	0.344714	0.2083	0.353238	0.196523	0.758674	0.00104175	-0.15009	0.593406	0.0764732	0.786483	0.0977611	0.728883	-0.126594	0.653016	-0.138036	0.623716	0.732886	0.00188246	0.121462	0.666313	0.068946	0.807114	-0.111779	0.691657	0.0833441	0.767764
ENSGALG00000004725	ENSGALG00000004725	LOC107057078	107057078	1:6505287:6514051	black	-0.451033	0.0915203	-0.382491	0.159412	0.287081	0.299527	-0.359915	0.187605	-0.0266048	0.925017	-0.376084	0.167106	-0.254112	0.360759	-0.138965	0.621359	-0.193375	0.489862	0.188843	0.500285	0.358535	0.189426	0.344249	0.208955	-0.250902	0.367064	-0.278108	0.315548	0.588243	0.0210776	-0.213974	0.44382	-0.0456692	0.87161	0.266457	0.337074	-0.0284191	0.919918	0.533499	0.0405485	-0.0243051	0.931483	-0.0947504	0.736956
ENSGALG00000016705	ENSGALG00000016705	SUPT3H	422053	-1:109064071:109337621	black	0.447317	0.0945565	0.42294	0.116251	0.0123956	0.965029	0.29551	0.284921	0.0508436	0.857193	-0.484411	0.0672673	0.263065	0.343491	0.205836	0.461746	-0.00952467	0.973125	0.061364	0.828016	-0.119242	0.672097	-0.262454	0.344655	0.210808	0.450752	0.0644083	0.81961	-0.0361265	0.898292	0.175771	0.530916	-0.0291184	0.917953	-0.315308	0.252315	-0.286248	0.300994	0.0947395	0.736985	0.130584	0.642741	0.0991674	0.725122
ENSGALG00000007357	ENSGALG00000007357	BCL6	424912	1:14938213:14954449	black	-0.446495	0.095238	-0.335144	0.222046	0.286072	0.301305	-0.313904	0.254549	0.0396159	0.888522	-0.252838	0.363255	-0.138636	0.622194	-0.109593	0.697421	-0.156934	0.576467	0.310029	0.260775	0.532702	0.0409062	0.56744	0.0273671	-0.262213	0.345115	0.0144816	0.959148	0.55322	0.0324199	-0.158957	0.571498	-0.0535007	0.849806	0.36002	0.187465	0.0645503	0.819218	0.539485	0.0379369	0.0412797	0.883869	0.162212	0.563542
ENSGALG00000039013	ENSGALG00000039013	EXT1	100858205	-1:135873550:136036349	black	-0.445395	0.0961549	-0.54524	0.0355458	0.155322	0.580439	-0.238384	0.392222	-0.396539	0.143373	0.368626	0.176369	-0.450117	0.0922621	-0.350803	0.199843	-0.113352	0.687519	0.0438302	0.876743	-0.14979	0.594153	0.440712	0.100128	-0.138274	0.623111	0.0102202	0.971163	-0.359796	0.187761	-0.169652	0.545533	-0.134468	0.632799	0.530323	0.0419878	-0.0677803	0.81032	-0.292747	0.289661	-0.409363	0.129715	0.00317109	0.991051
ENSGALG00000042647	ENSGALG00000042647		NA	1:465776:474369	black	-0.44225	0.0988104	-0.587136	0.0213815	0.0830406	0.768589	-0.47401	0.0742578	-0.0648421	0.818414	0.185005	0.509193	-0.578998	0.023719	-0.160375	0.568026	-0.155177	0.580795	-0.141169	0.615781	0.0403573	0.886448	0.162473	0.562907	-0.14869	0.596896	-0.099266	0.724858	-0.0510167	0.856712	-0.500143	0.0576162	0.126818	0.652438	0.441358	0.0995731	-0.240105	0.388709	0.0597166	0.832572	-0.197524	0.480413	-0.20218	0.46991
ENSGALG00000013229	ENSGALG00000013229	CMAS	418199	-1:66843524:66853791	black	-0.442024	0.0990035	-0.570417	0.0263894	0.252186	0.364535	-0.264825	0.340153	-0.0901651	0.749299	-0.116265	0.679876	-0.450602	0.0918685	-0.353703	0.195894	0.0832218	0.768097	0.159408	0.570394	0.0120752	0.965932	0.479912	0.0702298	-0.183051	0.513755	-0.157413	0.575287	0.187679	0.502978	-0.179869	0.521223	0.242377	0.384098	0.25448	0.360039	0.174032	0.535053	0.209255	0.454171	-0.394132	0.14604	0.142239	0.613081
ENSGALG00000014342	ENSGALG00000014342	TEAD4	395542	-1:75219390:75286457	black	-0.441558	0.0994022	-0.298535	0.279785	0.260599	0.3482	-0.133603	0.635008	-0.275283	0.320693	0.00761025	0.978526	-0.221415	0.427742	-0.119489	0.671451	-0.287246	0.299238	0.354098	0.19536	0.456505	0.0871749	0.650664	0.00862042	-0.088984	0.752488	0.0842839	0.765213	0.111041	0.693601	-0.0937547	0.739631	-0.309905	0.260977	0.78195	0.000572715	0.0838731	0.766328	0.0593098	0.833698	-0.133556	0.635128	-0.0337604	0.904924
ENSGALG00000034475	ENSGALG00000034475	EIF3G	101747413	1:1010526:1018772	black	-0.440618	0.100209	-0.546253	0.0351371	0.199379	0.476214	-0.329478	0.230448	-0.116839	0.678374	0.0334064	0.905917	-0.383433	0.158301	-0.381175	0.160973	-0.0689056	0.807225	0.227021	0.41583	0.264783	0.340232	0.360644	0.186646	-0.295864	0.284316	-0.185577	0.507861	0.156953	0.57642	-0.172847	0.53788	0.0557504	0.843561	0.673816	0.00588232	0.125338	0.656262	0.0466375	0.868909	-0.276032	0.319324	-0.302014	0.273946
ENSGALG00000031158	ENSGALG00000031158	OAT	426430	-1:32975013:32985638	black	-0.438788	0.101793	-0.44592	0.0957166	0.226581	0.416759	-0.198681	0.477793	-0.308189	0.263763	0.227895	0.413988	-0.216598	0.438117	-0.350995	0.19958	-0.121024	0.667454	0.411054	0.127982	-0.0716227	0.799763	0.269501	0.331371	-0.274416	0.322281	-0.301741	0.274402	-0.147998	0.598623	0.0167943	0.95263	-0.251498	0.365889	0.417807	0.121222	0.543253	0.0363584	-0.0249063	0.929792	-0.23799	0.393028	-0.246955	0.374898
ENSGALG00000045036	ENSGALG00000045036		NA	-1:2313316:2315620	black	-0.438036	0.102449	-0.402476	0.136934	0.0815509	0.772639	-0.235149	0.39887	-0.0747287	0.791253	0.155004	0.581222	-0.175476	0.531617	-0.218909	0.433124	-0.0532819	0.850414	0.304415	0.26996	0.0927517	0.742329	0.410657	0.128387	-0.247519	0.373773	-0.17451	0.533914	-0.027747	0.921806	-0.0689257	0.80717	-0.0524826	0.852636	0.491683	0.0626709	0.651027	0.00857094	-0.116321	0.679729	-0.117988	0.675371	-0.148673	0.596937
ENSGALG00000036395	ENSGALG00000036395	IGHVL	769232	-1:2272709:2649530	black	-0.437609	0.102823	-0.424242	0.115012	0.115968	0.680655	-0.267084	0.335893	-0.201465	0.471517	-0.0346288	0.902489	-0.385796	0.155536	-0.145136	0.605791	-0.10158	0.718683	-0.086054	0.760414	0.0139944	0.960521	0.190663	0.496089	-0.138882	0.621569	-0.306629	0.266315	0.0682833	0.808936	-0.215084	0.441403	-0.0429544	0.879189	0.225597	0.418839	0.0286547	0.919256	0.12718	0.651502	-0.202789	0.468547	-0.197126	0.481315
ENSGALG00000035773	ENSGALG00000035773	PIK3C3	100857877	-1:3984326:4085724	black	-0.435152	0.104993	-0.515496	0.0492117	0.156614	0.577254	-0.153007	0.586161	-0.264874	0.340061	-0.0388422	0.890687	-0.526103	0.0439577	-0.242997	0.382846	-0.0960402	0.733494	0.190991	0.495332	0.201248	0.472005	0.592628	0.0199061	-0.0262092	0.926129	-0.0743476	0.792296	0.00435316	0.987715	-0.215242	0.441059	0.0022431	0.99367	0.689546	0.00445253	-0.0105386	0.970265	0.0223945	0.936859	-0.409483	0.12959	-0.0471872	0.867376
ENSGALG00000031360	ENSGALG00000031360	FDX1L	422172	1:192612:196135	black	0.432328	0.107526	0.524118	0.044908	0.0494289	0.861131	0.355977	0.192832	0.0227542	0.935847	-0.124126	0.659398	0.332913	0.225331	0.306794	0.266044	-0.0371894	0.895314	0.0175397	0.95053	0.0596503	0.832755	-0.428649	0.110888	0.231893	0.405619	0.140133	0.6184	-0.175533	0.531482	0.208777	0.455226	-0.154278	0.583016	-0.238626	0.391726	-0.123052	0.662183	0.145486	0.604913	0.217877	0.43535	-0.0909793	0.747103
ENSGALG00000007078	ENSGALG00000007078	ENTPD1	423826	1:22955041:22993260	black	-0.429444	0.110155	-0.373821	0.169882	-0.148285	0.597906	-0.271271	0.328082	-0.143303	0.610399	0.0426745	0.879971	-0.201918	0.470498	-0.142131	0.613354	-0.067725	0.810472	0.228117	0.413521	-0.0840393	0.765877	0.558435	0.0304915	-0.188754	0.500492	-0.00486812	0.986262	-0.104267	0.71153	-0.123281	0.661588	-0.174684	0.5335	0.4349	0.105217	-0.1654	0.555795	-0.0300016	0.915473	-0.0774146	0.783911	0.104115	0.711933
ENSGALG00000010627	ENSGALG00000010627	PRPF38A	771795	1:24744263:24748574	black	-0.429427	0.110171	-0.437947	0.102527	0.0769664	0.785136	-0.292024	0.29091	-0.141365	0.615285	-0.113751	0.686471	-0.327233	0.23383	-0.201032	0.472489	-0.116192	0.680068	0.214854	0.441904	0.0697899	0.804795	0.465292	0.0805062	-0.187963	0.502322	-0.0589461	0.834705	-0.0651955	0.817439	-0.196067	0.483721	-0.0245692	0.930741	0.628929	0.0120161	0.0143558	0.959502	-0.0794041	0.778484	-0.190084	0.497422	-0.116267	0.679872
ENSGALG00000002097	ENSGALG00000002097	LOC415324	415324	-1:1847504:1849186	black	0.42937	0.110223	0.411532	0.127495	-0.116647	0.678877	0.341124	0.213391	0.108253	0.700963	-0.0564005	0.841758	0.295025	0.285749	0.115187	0.6827	0.113082	0.688227	0.0264185	0.92554	0.0072826	0.97945	-0.400697	0.138842	0.191128	0.495017	0.0212249	0.940151	0.116697	0.678746	0.247413	0.373985	0.0249168	0.929763	-0.386738	0.154443	0.0426995	0.879901	0.0265341	0.925216	0.107479	0.703011	-0.0165662	0.953272
ENSGALG00000015152	ENSGALG00000015152	BOC	418361	-1:84399987:84443291	black	-0.427032	0.112389	-0.364276	0.181923	0.149877	0.593937	-0.437507	0.102912	-0.0639591	0.820849	0.0444148	0.87511	-0.20321	0.467602	-0.0191144	0.946094	-0.376079	0.167114	0.182744	0.514474	0.145054	0.605997	0.398356	0.141382	-0.248316	0.372187	-0.190775	0.49583	-0.0242352	0.93168	-0.306168	0.26707	-0.276327	0.318786	0.679962	0.00528605	0.0348521	0.901863	0.00168985	0.995231	0.127233	0.651365	-0.291364	0.292051
ENSGALG00000038194	ENSGALG00000038194	NA	NA	NA:NA:NA	black	-0.424301	0.114956	-0.573793	0.025313	0.274447	0.322225	-0.240351	0.388209	-0.184368	0.510678	-0.0264179	0.925542	-0.685455	0.00479453	-0.196323	0.483138	-0.177055	0.527871	0.109412	0.697898	0.288322	0.29735	0.408795	0.1303	0.0409092	0.884905	-0.0826897	0.769542	0.108091	0.701391	-0.420086	0.118997	0.139666	0.619582	0.663818	0.00696451	-0.0176047	0.950347	0.138001	0.623806	-0.416568	0.122443	-0.1357	0.629656
ENSGALG00000034702	ENSGALG00000034702	NA	NA	NA:NA:NA	black	-0.423232	0.115971	-0.540252	0.0376113	0.458719	0.0854587	-0.384717	0.156794	-0.232359	0.404649	-0.000854218	0.997589	-0.393465	0.146785	-0.282509	0.30763	-0.336139	0.220591	0.321346	0.242846	0.273907	0.323216	0.571232	0.0261263	-0.236597	0.395886	0.149359	0.595228	-0.0107091	0.969785	-0.298681	0.279538	-0.160398	0.56797	0.708463	0.00311407	-0.224082	0.422054	0.163698	0.559924	-0.200557	0.47356	0.0912134	0.746472
ENSGALG00000025751	ENSGALG00000025751	NMRK2	100858798	-1:1567936:1574937	black	-0.423196	0.116006	-0.357088	0.191348	0.159334	0.570573	-0.266757	0.33651	-0.0940638	0.7388	0.0186237	0.947476	-0.156848	0.576678	-0.191185	0.494888	-0.0500505	0.8594	0.165818	0.554783	0.0485289	0.863637	0.250146	0.368557	-0.293801	0.287848	-0.417152	0.121867	0.15777	0.574411	-0.0429021	0.879335	-0.119521	0.671368	0.258784	0.35169	0.314724	0.253243	0.239032	0.390896	-0.0650219	0.817918	-0.267524	0.335067
ENSGALG00000044735	ENSGALG00000044735		771972	-1:10475408:10481911	black	-0.422539	0.116633	-0.567547	0.0273312	0.0628697	0.823856	-0.550691	0.0333872	0.122402	0.66387	0.13193	0.639289	-0.0699495	0.804357	-0.42642	0.112961	0.0802773	0.776105	0.208087	0.456753	0.052013	0.853941	0.581524	0.0229736	-0.657124	0.00777266	-0.0385097	0.891618	-0.0893279	0.751559	-0.081078	0.773925	0.0784455	0.781098	0.621768	0.0133368	0.00473426	0.98664	-0.0356642	0.899587	-0.00157291	0.995561	-0.0437977	0.876833
ENSGALG00000004174	ENSGALG00000004174	VPS26A	423696	1:11524668:11536453	black	-0.421744	0.117396	-0.459486	0.0848703	0.204777	0.464104	-0.24347	0.381891	-0.393645	0.146584	0.267668	0.334798	-0.255134	0.358763	-0.51532	0.0493027	-0.0165757	0.953246	-0.170785	0.542814	-0.147105	0.600856	0.174592	0.533718	-0.289189	0.295834	-0.165695	0.55508	0.143129	0.610836	0.0282869	0.920289	-0.0975334	0.729493	-0.00570507	0.983901	-0.0231368	0.93477	-0.240785	0.387326	-0.388311	0.152629	0.033461	0.905764
ENSGALG00000038943	ENSGALG00000038943	RASSF5	419844	1:2489952:2508040	black	0.421512	0.117619	0.415165	0.123837	-0.317909	0.24821	0.407593	0.131544	0.207275	0.458549	-0.340888	0.21373	0.12063	0.668478	0.225619	0.418792	0.298086	0.280544	-0.0745835	0.79165	-0.00551095	0.984449	-0.658256	0.00763105	0.323602	0.239366	-0.157604	0.574819	0.197696	0.480022	0.166295	0.553627	0.298506	0.279834	-0.537159	0.0389363	0.0749147	0.790744	0.247238	0.374334	0.02106	0.940615	-0.222678	0.425043
ENSGALG00000012311	ENSGALG00000012311	UBE2D3	422713	-1:60910770:60932855	black	-0.420758	0.118346	-0.26549	0.338895	0.315404	0.252162	-0.334928	0.222364	-0.0375114	0.894413	-0.38739	0.153689	-0.124508	0.65841	-0.0436829	0.877154	-0.320175	0.244666	0.312283	0.257142	0.565333	0.0280754	0.473209	0.0748166	-0.236295	0.396508	0.0444795	0.87493	0.526188	0.0439176	-0.200298	0.474142	-0.194153	0.488084	0.4487	0.0934187	-0.160799	0.566989	0.505031	0.0548343	0.109307	0.698176	0.0471751	0.86741
ENSGALG00000033992	ENSGALG00000033992	NA	NA	NA:NA:NA	black	-0.419515	0.119552	-0.189041	0.499828	0.316603	0.250266	0.0254435	0.928282	-0.262817	0.343964	-0.22562	0.418791	-0.234601	0.4	-0.0573798	0.839043	-0.163496	0.560416	0.28416	0.30469	0.501253	0.0569757	0.48312	0.0681083	0.0621612	0.825813	-0.046535	0.869195	0.530836	0.0417528	-0.0228476	0.935584	-0.189458	0.498865	0.261488	0.346498	0.168751	0.547702	0.468852	0.0779109	-0.202439	0.46933	0.123695	0.660516
ENSGALG00000029772	ENSGALG00000029772	NA	NA	NA:NA:NA	black	-0.418191	0.120845	-0.420382	0.11871	0.220269	0.4302	-0.241797	0.385272	-0.138257	0.623155	-0.187341	0.503762	-0.331408	0.227564	-0.163305	0.560881	-0.18558	0.507854	0.236276	0.396547	0.210821	0.450722	0.598085	0.018519	-0.12353	0.660944	-0.165241	0.55618	0.216622	0.438065	-0.194893	0.486394	-0.073327	0.795091	0.5461	0.0351987	0.0802095	0.77629	0.126014	0.654513	-0.178143	0.525296	-0.00552612	0.984406
ENSGALG00000016036	ENSGALG00000016036	DOP1B	NA	1:107923828:107968058	black	-0.416216	0.122791	-0.287682	0.298472	0.143555	0.609766	-0.286575	0.300418	-0.0948533	0.736679	0.137055	0.626209	-0.146351	0.602744	0.0319196	0.910089	-0.367722	0.177514	0.196909	0.481807	0.182217	0.515708	0.532221	0.0411232	-0.114746	0.683858	-0.0826786	0.769572	0.00421062	0.988118	-0.235983	0.397149	-0.28709	0.299511	0.583889	0.0222919	0.411761	0.127263	-0.173334	0.536717	0.094268	0.738251	-0.0598122	0.832307
ENSGALG00000012561	ENSGALG00000012561	PKP4	424328	1:36368611:36435156	black	-0.415674	0.12333	-0.548007	0.0344375	0.180129	0.520612	-0.253231	0.362483	-0.143548	0.609783	0.0386674	0.891176	-0.220613	0.429461	-0.523873	0.0450263	0.08633	0.759666	0.46433	0.081218	0.213858	0.444074	0.680744	0.00521369	-0.409115	0.12997	0.0609684	0.829109	0.0484205	0.863939	0.0432517	0.878358	0.0156639	0.955815	0.663612	0.00698836	0.0343939	0.903148	0.0912381	0.746405	-0.319505	0.24571	0.0919343	0.744529
ENSGALG00000012921	ENSGALG00000012921	ETV6	395750	1:71449364:71582019	black	-0.413883	0.12512	-0.447937	0.0940457	0.344429	0.208701	-0.204453	0.464825	-0.292552	0.289998	0.0375534	0.894295	-0.325176	0.236956	-0.318107	0.247898	-0.221825	0.426866	0.259522	0.350268	0.194079	0.488253	0.248972	0.370883	-0.179681	0.521667	-0.126571	0.653074	0.0379981	0.89305	-0.119627	0.671091	-0.110898	0.693977	0.475586	0.0731667	0.493253	0.0617096	-0.109031	0.698905	-0.288585	0.29689	-0.18486	0.50953
ENSGALG00000013438	ENSGALG00000013438	TEX10	420993	1:89118938:89169010	black	-0.411373	0.127657	-0.276818	0.317892	0.482974	0.0682034	-0.17399	0.535154	-0.211954	0.448236	-0.0584003	0.836216	-0.196744	0.482183	-0.191454	0.494268	-0.244448	0.379922	0.559325	0.0301714	0.345638	0.207002	0.30636	0.266756	-0.13523	0.630856	-0.0854711	0.761993	0.425102	0.114199	-0.0645206	0.8193	-0.264108	0.34151	0.318295	0.247603	0.0725947	0.797098	0.640412	0.0101129	-0.117581	0.676434	-0.0262203	0.926098
ENSGALG00000012613	ENSGALG00000012613	FBP1	395218	-1:41459118:41469158	black	0.408967	0.130122	0.546411	0.0350739	-0.0192252	0.945782	0.521992	0.0459423	-0.0456136	0.871765	-0.191624	0.493877	0.172379	0.538997	0.278323	0.315159	0.0465147	0.869251	-0.0341861	0.903731	0.118594	0.673786	-0.63007	0.0118154	0.462093	0.0828907	0.00574316	0.983793	0.261424	0.346621	0.216776	0.43773	-0.0242405	0.931665	-0.583545	0.02239	0.0181173	0.948902	0.281355	0.309695	0.0152932	0.95686	-0.0705582	0.802685
ENSGALG00000039880	ENSGALG00000039880	RHEB	420434	-1:6331554:6363279	black	-0.408828	0.130266	-0.387258	0.153842	0.0532108	0.850612	-0.264585	0.340606	-0.250887	0.367094	0.0803582	0.775885	-0.215901	0.439628	-0.296865	0.282614	-0.151709	0.58938	0.261757	0.345984	0.212362	0.447343	0.440412	0.100386	-0.276947	0.317658	0.0635517	0.821973	-0.0961239	0.73327	-0.0697867	0.804804	-0.216054	0.439297	0.787331	0.000493726	-0.210276	0.451922	-0.144112	0.608365	-0.167237	0.551352	-0.213511	0.44483
ENSGALG00000010346	ENSGALG00000010346	TGFB3	396438	-1:38669193:38684139	black	0.406079	0.133124	0.21693	0.437398	-0.224548	0.421064	0.00340821	0.990382	0.231849	0.405709	0.101869	0.717913	0.361965	0.184919	-0.0256102	0.927813	0.253639	0.361684	-0.175822	0.530795	-0.649105	0.00883549	-0.617474	0.0141808	-0.19261	0.491614	-0.219992	0.430794	-0.471404	0.0760879	0.207893	0.457181	0.138948	0.621402	-0.506993	0.0537461	0.0645154	0.819314	-0.271084	0.328428	0.207452	0.458157	-0.221809	0.426899
ENSGALG00000030901	ENSGALG00000030901	NA	NA	NA:NA:NA	black	-0.404121	0.135185	-0.506733	0.0538897	-0.0250215	0.929468	-0.311905	0.257749	0.0635189	0.822064	-0.0702829	0.803441	-0.325039	0.237166	-0.29247	0.290139	0.130502	0.642952	-0.0357212	0.899428	0.0473082	0.867039	0.37562	0.167673	-0.214815	0.441989	-0.0479916	0.865134	0.311614	0.258218	-0.202787	0.46855	0.336049	0.220723	0.0342237	0.903625	0.286318	0.300871	-0.0189814	0.946468	-0.238159	0.392683	0.255396	0.358254
ENSGALG00000015803	ENSGALG00000015803	KDM3A	422917	1:85573746:85600909	black	-0.404051	0.135259	-0.493001	0.0618629	-0.0442227	0.875647	-0.368265	0.176825	-0.05722	0.839486	0.241379	0.386121	-0.31749	0.248867	-0.232796	0.40374	-0.0175536	0.95049	0.0389612	0.890354	-0.333577	0.224351	0.137961	0.623907	-0.236069	0.396972	-0.344617	0.208436	-0.185944	0.507006	-0.221027	0.428573	0.0570422	0.839979	0.218341	0.434347	0.391861	0.148588	-0.21787	0.435365	-0.156467	0.577616	-0.218444	0.434126
ENSGALG00000030492	ENSGALG00000030492	ASCL2	NA	1:13869949:13870452	black	-0.403259	0.1361	-0.236868	0.39533	0.0173415	0.951088	-0.252602	0.363717	-0.176202	0.529892	0.4774	0.0719249	-0.0767109	0.785833	-0.113662	0.686704	-0.157292	0.575585	0.0398148	0.887966	-0.209298	0.454077	0.157052	0.576177	-0.159206	0.570889	-0.157782	0.574383	-0.104615	0.710607	-0.0765619	0.78624	-0.26214	0.345254	0.170461	0.543592	0.34549	0.20721	-0.280964	0.310396	-0.00247354	0.99302	-0.12586	0.654912
ENSGALG00000019233	ENSGALG00000019233	PLA2G10L	418356	-1:83879170:83892733	black	-0.402246	0.13718	-0.301522	0.274767	0.396913	0.142961	-0.309628	0.261426	-0.0993306	0.724686	-0.0119334	0.966332	-0.25015	0.368549	-0.119044	0.672613	-0.205922	0.461553	0.19701	0.481579	0.233561	0.402154	0.107637	0.702593	-0.172333	0.539108	-0.168993	0.547119	0.371281	0.173034	-0.205251	0.463047	-0.119655	0.671019	0.184298	0.510841	-0.0877747	0.755756	0.571503	0.0260394	-0.04629	0.869878	-0.146892	0.60139
ENSGALG00000015244	ENSGALG00000015244	TBX19	395793	-1:85209232:85223485	black	0.401378	0.13811	0.511696	0.0512018	-0.351524	0.198857	0.347362	0.204595	0.243199	0.382438	-0.368688	0.17629	0.321207	0.243063	0.299058	0.278901	0.262108	0.345314	-0.163681	0.559967	-0.30922	0.262087	-0.412821	0.126188	0.279145	0.313673	-0.314692	0.253293	0.294951	0.285876	0.244523	0.379772	0.142772	0.611737	-0.737063	0.00171813	-0.0229042	0.935425	0.145734	0.60429	0.190916	0.495504	-0.00867489	0.975522
ENSGALG00000027714	ENSGALG00000027714	ATG10	427322	-1:63575834:63658645	black	-0.400102	0.139485	-0.416023	0.122983	0.156956	0.576413	-0.168348	0.548673	-0.157472	0.575143	0.171138	0.541968	-0.405849	0.133365	-0.126063	0.654388	-0.157634	0.574744	0.169707	0.545403	0.107557	0.702805	0.252802	0.363324	-0.0213711	0.93974	-0.273655	0.32368	-0.0210249	0.940714	-0.229484	0.410651	-0.023169	0.93468	0.479057	0.0708035	0.601846	0.0176069	-0.0797782	0.777465	-0.234635	0.399931	-0.277024	0.317518
ENSGALG00000040646	ENSGALG00000040646	INO80B	107049493	-1:90957760:90959374	black	0.398951	0.140733	0.216942	0.437372	-0.134936	0.631606	0.125082	0.656923	0.186715	0.505215	-0.296005	0.284077	0.0736901	0.794096	0.002102	0.994068	0.226849	0.416193	-0.346352	0.206003	0.064076	0.820526	-0.607056	0.0164009	0.0311603	0.91222	-0.107389	0.703249	0.258628	0.351989	0.0766814	0.785914	0.299558	0.278059	-0.435947	0.104287	-0.564926	0.0282138	0.259307	0.350681	0.0196171	0.944678	-0.219767	0.431277
ENSGALG00000034130	ENSGALG00000034130	NA	NA	NA:NA:NA	black	0.395535	0.144482	0.297825	0.280986	-0.0493205	0.861433	0.265438	0.338994	0.237635	0.393755	-0.00278772	0.992133	0.253195	0.362554	0.10178	0.71815	0.274517	0.322096	-0.261574	0.346335	0.0544363	0.847208	-0.274384	0.32234	0.0905828	0.748172	0.0293522	0.917297	0.104665	0.710472	0.19936	0.476258	0.250122	0.368605	-0.50772	0.0533467	0.0949622	0.736387	0.123051	0.662187	0.0870372	0.757751	0.153676	0.584506
ENSGALG00000021139	ENSGALG00000021139	NA	NA	NA:NA:NA	black	-0.394393	0.14575	-0.294623	0.286437	-0.0759103	0.788021	-0.349923	0.201051	0.0553433	0.844691	-0.10258	0.716019	0.116559	0.679107	-0.239186	0.390583	0.0227489	0.935862	0.254416	0.360164	0.200246	0.47426	0.644316	0.0095226	-0.502933	0.0560159	-0.0817167	0.772187	0.220877	0.428895	0.0805455	0.775375	-0.153385	0.585225	0.494247	0.0611061	-0.0939765	0.739035	0.0875257	0.75643	0.129241	0.646193	0.00643639	0.981837
ENSGALG00000011992	ENSGALG00000011992	EP300	418000	-1:49780325:49836356	black	-0.393883	0.146319	-0.33342	0.224581	0.471462	0.076047	-0.170028	0.544632	-0.301674	0.274513	0.174558	0.533801	-0.364565	0.18155	-0.167869	0.549827	-0.387504	0.153558	0.0880807	0.754929	0.627327	0.0123023	0.392643	0.147707	-0.00936603	0.973573	0.0752022	0.789958	0.442225	0.0988321	-0.230961	0.407562	-0.239213	0.390528	0.541657	0.0370208	-0.0731092	0.795688	0.192931	0.49088	-0.205579	0.462316	-0.0352151	0.900846
ENSGALG00000030597	ENSGALG00000030597	KIF11	423809	-1:21687983:21704004	black	-0.393113	0.14718	-0.376046	0.167154	0.213636	0.444559	-0.294352	0.286902	-0.229134	0.411384	-0.0242439	0.931656	-0.332446	0.226022	-0.251685	0.36552	-0.213239	0.445425	-0.0622748	0.825499	0.0739574	0.793365	0.122262	0.664236	-0.136247	0.628264	-0.285189	0.302865	0.428344	0.11117	-0.194549	0.48718	-0.101485	0.718934	0.122673	0.663168	-0.128715	0.647546	0.0765074	0.786389	-0.198404	0.478419	-0.147978	0.598674
ENSGALG00000013063	ENSGALG00000013063	SRD5A1	770453	-1:79772665:79786504	black	0.392378	0.148005	0.41958	0.119488	-0.125106	0.656862	0.294986	0.285816	0.11025	0.695687	0.0811244	0.773799	0.41442	0.124581	0.0248998	0.929811	0.255292	0.358456	-0.0270785	0.923685	-0.144201	0.608139	-0.640355	0.0101217	0.025253	0.928817	0.072159	0.798292	-0.0604425	0.830564	0.359661	0.187939	0.0725033	0.797348	-0.599038	0.0182845	0.191357	0.494491	-0.00872926	0.975369	0.122025	0.66485	-0.0531424	0.850802
ENSGALG00000021569	ENSGALG00000021569	C1QA	419504	-1:6079357:6081398	black	-0.392036	0.148391	-0.29494	0.285895	0.387568	0.153484	-0.211407	0.449437	-0.138997	0.621277	0.00999059	0.971811	-0.233753	0.401755	-0.195551	0.484896	-0.20825	0.456392	0.226626	0.416664	0.384025	0.157604	0.263887	0.341931	-0.131927	0.639296	-0.178882	0.52355	0.520367	0.0467446	-0.12125	0.666865	-0.122573	0.663427	0.328587	0.231787	0.123219	0.661751	0.349239	0.201994	-0.12875	0.647456	-0.145571	0.604701
ENSGALG00000040264	ENSGALG00000040264	C9H2ORF82	768774	1:1225609:1232084	black	-0.391679	0.148793	-0.278808	0.314282	-0.0613629	0.828019	-0.282008	0.308526	-0.0227648	0.935817	-0.0747647	0.791154	-0.279792	0.312504	-0.0053489	0.984906	-0.184371	0.51067	-0.161271	0.565838	0.384991	0.156474	0.301072	0.27552	-0.0611264	0.828673	-0.134739	0.632107	0.547975	0.0344504	-0.284366	0.304325	-0.0438001	0.876827	0.272816	0.325226	-0.22209	0.426299	0.142702	0.611913	0.00460151	0.987015	-0.0883673	0.754154
ENSGALG00000001593	ENSGALG00000001593	UFD1L	374186	-1:961140:967346	black	-0.3885	0.152412	-0.294482	0.28668	0.0942531	0.738291	-0.0376688	0.893972	-0.142011	0.613657	-0.230176	0.409201	-0.251577	0.365734	-0.29908	0.278865	0.113134	0.688092	0.225363	0.419335	0.461401	0.0834131	0.390598	0.150017	-0.116514	0.679225	-0.158588	0.572403	0.644578	0.0094839	0.0639947	0.820751	0.0596953	0.832631	0.303499	0.271477	-0.042534	0.880363	0.415393	0.12361	-0.312269	0.257165	-0.0674506	0.811228
ENSGALG00000039191	ENSGALG00000039191	NA	NA	NA:NA:NA	black	0.385297	0.156116	0.424461	0.114805	-0.224095	0.422026	0.243541	0.381749	0.0394554	0.888971	0.244572	0.379673	0.358838	0.189025	0.145277	0.605437	0.101465	0.718988	-0.111822	0.691544	-0.349735	0.201311	-0.631084	0.0116393	0.112871	0.688784	0.0908591	0.747427	-0.385364	0.156039	0.232325	0.40472	-0.0706724	0.802371	-0.443135	0.0980586	0.0860973	0.760296	-0.306635	0.266304	0.179903	0.521145	-0.129401	0.645781
ENSGALG00000002705	ENSGALG00000002705	CISD1	423642	1:5951613:5961190	black	-0.383542	0.158172	-0.428143	0.111357	0.137615	0.624784	-0.228989	0.411689	-0.122997	0.662328	0.0846942	0.7641	-0.265018	0.339787	-0.267099	0.335865	-0.048426	0.863924	0.357486	0.190818	0.327089	0.234048	0.608428	0.016094	-0.247991	0.372834	0.145277	0.605438	-0.12493	0.657316	-0.101771	0.718172	-0.0534223	0.850024	0.876806	1.78e-05	-0.0952147	0.735709	0.0571467	0.839689	-0.200066	0.474666	-0.0850884	0.763031
ENSGALG00000000235	ENSGALG00000000235	PPP2R2A	419523	-1:688378:726427	black	-0.38222	0.159733	-0.407958	0.131166	0.265019	0.339786	-0.213765	0.444277	-0.184381	0.510648	0.241477	0.385923	-0.233188	0.402926	-0.231824	0.405762	-0.218845	0.433261	0.364672	0.181412	0.246982	0.374844	0.706318	0.0032472	-0.154637	0.582129	0.157284	0.575605	-0.055958	0.842985	-0.134258	0.633335	-0.185599	0.50781	0.727263	0.00212336	0.172593	0.538487	-0.104887	0.709883	-0.16764	0.550378	0.142759	0.61177
ENSGALG00000023541	ENSGALG00000023541	SPHK1	427803	-1:4429920:4435069	black	-0.380522	0.161751	-0.249028	0.370773	0.280864	0.310577	-0.134102	0.633732	-0.244153	0.380516	-0.0782501	0.781631	-0.141567	0.614775	-0.0881968	0.754615	-0.278425	0.314975	0.355729	0.193165	0.295795	0.284434	0.658694	0.00757681	-0.110679	0.694555	0.0208014	0.941343	0.0335741	0.905447	-0.0556251	0.843909	-0.324914	0.237356	0.689072	0.00449119	0.0744326	0.792064	0.0521168	0.853652	-0.0775199	0.783624	0.011695	0.967004
ENSGALG00000038340	ENSGALG00000038340	ZBTB14	396070	1:100241333:100243364	black	-0.379977	0.162403	-0.431768	0.108033	0.0905119	0.748363	-0.399397	0.140249	0.037888	0.893358	-0.0941976	0.738441	-0.219821	0.431161	-0.117105	0.677678	-0.132895	0.636818	0.0998694	0.723246	0.179798	0.521393	0.642842	0.00974216	-0.298555	0.279751	-0.0617848	0.826853	-0.000352748	0.999005	-0.244237	0.380347	-0.0215671	0.939188	0.660933	0.00730426	-0.123037	0.662224	0.0387411	0.89097	0.00976124	0.972458	-0.0194797	0.945065
ENSGALG00000016187	ENSGALG00000016187	WDR4	418540	-1:110880693:110902129	black	0.379626	0.162823	0.404372	0.13492	0.139718	0.619451	0.236726	0.39562	0.176332	0.529585	-0.103789	0.712801	0.212509	0.447022	0.277377	0.316876	-0.0322092	0.909276	-0.0609902	0.829049	0.205213	0.463131	-0.403991	0.135323	0.239742	0.389448	0.293571	0.288242	0.046565	0.869111	0.0267819	0.924519	0.107351	0.703351	-0.316264	0.250801	0.0415511	0.88311	0.154356	0.582824	0.18717	0.50416	0.104262	0.711545
ENSGALG00000034995	ENSGALG00000034995	NA	NA	NA:NA:NA	black	-0.378976	0.163603	-0.248815	0.371196	0.229625	0.410356	-0.215427	0.440657	-0.108942	0.699142	-0.000449445	0.998732	-0.253635	0.361692	-0.0669945	0.812483	-0.179994	0.520931	0.00211543	0.99403	0.274828	0.321526	0.344535	0.208552	-0.0440532	0.87612	-0.0883073	0.754316	0.422395	0.116771	-0.193308	0.490017	-0.0860198	0.760506	0.271886	0.326943	-0.142939	0.611317	0.238408	0.392173	-0.0888441	0.752865	-0.00647411	0.981731
ENSGALG00000007178	ENSGALG00000007178	FADS2	423122	1:16940926:16958072	black	-0.376505	0.166594	-0.315033	0.252751	-0.0830602	0.768536	-0.22729	0.415264	-0.0736854	0.794109	-0.0622349	0.825609	-0.226193	0.417579	-0.119137	0.672371	-0.0066114	0.981344	-0.0995001	0.724232	0.148316	0.59783	0.411651	0.127374	-0.168471	0.548376	-0.23967	0.389596	0.236582	0.395916	-0.111735	0.691774	-0.0352394	0.900778	0.357898	0.19027	-0.192639	0.491548	0.0672929	0.811661	-0.0952208	0.735693	-0.137779	0.624368
ENSGALG00000029725	ENSGALG00000029725	NA	NA	NA:NA:NA	black	-0.374436	0.169125	-0.29755	0.28145	0.420349	0.118742	-0.18273	0.514505	-0.186709	0.505228	-0.175581	0.531366	-0.235204	0.398756	-0.211822	0.448526	-0.164139	0.558853	0.447093	0.094742	0.235768	0.397593	0.320734	0.243797	-0.133323	0.635724	-0.132012	0.639078	0.436905	0.103442	-0.072865	0.796357	-0.168987	0.547134	0.231205	0.407054	-0.137218	0.625793	0.648158	0.00896828	-0.163278	0.560947	0.0263109	0.925843
ENSGALG00000008370	ENSGALG00000008370	TRAK2	424082	-1:11462356:11480366	black	-0.373987	0.169678	-0.226998	0.415879	0.244202	0.380417	-0.182879	0.514157	-0.0929914	0.741684	-0.254485	0.36003	-0.154635	0.582134	-0.116423	0.679464	-0.179176	0.522857	0.191447	0.494284	0.545667	0.0353734	0.434008	0.106014	-0.151998	0.588663	-0.128822	0.647271	0.631177	0.0116232	-0.076616	0.786093	-0.147341	0.600266	0.404387	0.134904	-0.140507	0.617455	0.433914	0.106098	-0.0394723	0.888924	-0.0799569	0.776978
ENSGALG00000001642	ENSGALG00000001642	GLT8D1	415898	-1:1175090:1180455	black	-0.368841	0.176097	-0.439308	0.101341	0.036979	0.895904	-0.384054	0.157571	0.0600636	0.831612	-0.0408729	0.885006	-0.183784	0.512042	-0.174307	0.534398	-0.06347	0.822199	0.164507	0.55796	0.125491	0.655866	0.644306	0.00952406	-0.338867	0.216632	-0.107386	0.703257	-0.0355347	0.89995	-0.180893	0.518816	0.00119911	0.996616	0.689626	0.00444611	-0.0250378	0.929423	-0.0194941	0.945024	-0.00834122	0.976463	-0.0700332	0.804127
ENSGALG00000001777	ENSGALG00000001777	MFSD11	417352	-1:4223660:4240761	black	-0.365152	0.180796	-0.283735	0.305445	0.125836	0.654973	-0.201713	0.47096	-0.144327	0.607823	0.161977	0.564114	-0.186879	0.504835	-0.0935274	0.740242	-0.0938897	0.739268	0.0125194	0.96468	0.120624	0.668495	0.43573	0.104479	-0.138807	0.621761	0.0194718	0.945087	-0.058372	0.836294	-0.1151	0.682928	-0.124556	0.658284	0.417323	0.121698	-0.0460283	0.870608	0.00518168	0.985378	-0.0913926	0.745989	0.013673	0.961427
ENSGALG00000035378	ENSGALG00000035378	DNAJC5	419256	-1:9520452:9536619	black	-0.363614	0.182778	-0.277259	0.31709	-0.1342	0.633483	-0.232455	0.404449	-0.188005	0.502223	0.194654	0.486941	-0.185654	0.50768	-0.104629	0.710568	-0.0724603	0.797466	-0.15633	0.577952	-0.104619	0.710595	0.255076	0.358876	-0.147055	0.600981	-0.149027	0.596054	-0.0852945	0.762472	-0.108298	0.700844	-0.170655	0.543126	0.269897	0.330633	-0.169881	0.544984	-0.201187	0.472141	-0.0759401	0.78794	-0.131968	0.639192
ENSGALG00000013829	ENSGALG00000013829	REPS1	421678	1:54198322:54264069	black	-0.363347	0.183124	-0.243409	0.382014	0.072917	0.796214	-0.0914749	0.745767	-0.206277	0.460765	0.351617	0.198729	-0.0822365	0.770774	-0.19213	0.492715	-0.00158177	0.995536	0.111708	0.691845	-0.0526696	0.852116	0.269888	0.330651	-0.160022	0.568889	-0.152349	0.587792	-0.129786	0.644792	0.0704841	0.802888	-0.16248	0.562889	0.270868	0.328828	0.501552	0.0568038	-0.203824	0.466231	-0.151351	0.590271	-0.120976	0.667578
ENSGALG00000041456	ENSGALG00000041456	SLC35G1	423800	-1:21239403:21244771	black	-0.363017	0.183551	-0.280694	0.310881	0.0971585	0.730497	-0.162196	0.56358	-0.122634	0.663269	0.0233777	0.934092	-0.240794	0.387309	-0.079979	0.776918	-0.178915	0.523472	0.0966032	0.731985	0.443273	0.0979415	0.441351	0.099579	-0.0967017	0.731721	-0.0677872	0.810301	0.140244	0.618121	-0.146085	0.60341	-0.117263	0.677264	0.72907	0.00204338	0.105857	0.707309	-0.0504686	0.858237	-0.0962073	0.733046	-0.265946	0.338036
ENSGALG00000041573	ENSGALG00000041573	BPNT2	421132	-1:111584670:111601427	black	-0.360179	0.187257	-0.196326	0.483132	0.1295	0.645526	-0.0683368	0.808789	-0.164442	0.558117	0.114846	0.683594	-0.0913618	0.746072	-0.0370654	0.895662	-0.187382	0.503667	0.243856	0.381114	0.24454	0.379736	0.434885	0.10523	-0.0602432	0.831115	-0.0378069	0.893585	-0.00260331	0.992653	-0.0318908	0.91017	-0.214039	0.443678	0.479216	0.0706964	0.624455	0.0128286	-0.168503	0.5483	-0.0510703	0.856563	-0.0609359	0.829199
ENSGALG00000038374	ENSGALG00000038374	SNX20	415726	1:6176432:6187342	black	0.359657	0.187944	0.36678	0.178712	-0.247312	0.374186	0.214795	0.442032	0.00954118	0.973079	0.238418	0.392152	0.386161	0.155112	0.0705353	0.802748	0.115488	0.681912	-0.00856022	0.975846	-0.472679	0.0751882	-0.495417	0.0604017	0.0304885	0.914106	0.0704948	0.802859	-0.564072	0.0285058	0.282936	0.306869	-0.106491	0.705627	-0.284025	0.304929	0.154158	0.583314	-0.474276	0.0740725	0.154565	0.582306	-0.144514	0.607354
ENSGALG00000010809	ENSGALG00000010809	BZW2	420594	1:28476110:28534287	black	-0.359025	0.188778	-0.292867	0.289455	-0.0118116	0.966675	-0.422671	0.116508	-0.128847	0.647208	0.0257736	0.927354	-0.118299	0.674558	-0.0688661	0.807334	-0.249695	0.369451	-0.180891	0.518821	-0.165218	0.556236	0.160313	0.568177	-0.274024	0.323001	-0.13966	0.619599	-0.105012	0.709552	-0.219362	0.432148	-0.212665	0.446681	0.215249	0.441044	-0.18414	0.51121	-0.247916	0.372983	0.0933823	0.740632	-0.131109	0.641396
ENSGALG00000017029	ENSGALG00000017029	FGL1L	428073	-1:171794980:171799117	black	-0.358722	0.189179	-0.273517	0.323933	-0.121408	0.666455	-0.242498	0.383854	-0.025874	0.927071	0.0499776	0.859603	-0.0899801	0.749798	0.00491383	0.986133	-0.107669	0.702508	0.0932545	0.740976	-0.0152352	0.957023	0.796376	0.000381051	-0.137427	0.625262	0.0990096	0.725543	-0.172054	0.539776	-0.141285	0.615488	-0.141236	0.615612	0.554739	0.0318488	-0.00349216	0.990145	-0.275495	0.320306	0.0442381	0.875604	0.245332	0.378146
ENSGALG00000009426	ENSGALG00000009426	AIDA	421335	1:18103016:18128618	black	-0.358526	0.189438	-0.232604	0.40414	0.0799688	0.776945	-0.144154	0.608259	-0.229279	0.41108	0.00673682	0.98099	-0.157203	0.575804	-0.0574529	0.838841	-0.175165	0.532355	0.103029	0.714824	0.105321	0.70873	0.535766	0.0395443	-0.0995451	0.724112	-0.0716692	0.799636	-0.0741237	0.792909	-0.0628057	0.824033	-0.271506	0.327646	0.561947	0.0292427	-0.0983158	0.727399	-0.0720427	0.798611	-0.0781883	0.7818	-0.0707907	0.802047
ENSGALG00000041756	ENSGALG00000041756	NA	NA	NA:NA:NA	black	-0.358437	0.189555	-0.290759	0.293101	0.119072	0.672539	-0.188844	0.500284	-0.296234	0.283687	0.306555	0.266436	-0.182917	0.514068	-0.181297	0.517867	-0.287533	0.298733	0.222736	0.42492	0.3704	0.174135	0.295039	0.285726	-0.160913	0.566711	0.137814	0.624279	-0.0219528	0.938102	-0.101338	0.719326	-0.363366	0.183099	0.628209	0.0121441	-0.0919645	0.744448	-0.0446216	0.874533	-0.0809941	0.774153	-0.162276	0.563385
ENSGALG00000029387	ENSGALG00000029387	PURA	430546	1:2072835:2073818	black	-0.358311	0.189722	-0.248777	0.37127	0.200893	0.472802	-0.148156	0.59823	-0.1037	0.713038	-0.441935	0.0990794	-0.187884	0.502505	-0.0744636	0.791979	-0.13383	0.634428	0.424532	0.114737	0.317859	0.248288	0.462693	0.0824392	-0.134102	0.633734	-0.224493	0.421181	0.357037	0.191416	-0.0612862	0.828231	-0.158329	0.573038	0.45087	0.0916518	-0.095048	0.736156	0.556575	0.0311691	-0.0636538	0.821692	-0.11166	0.691971
ENSGALG00000030363	ENSGALG00000030363	IFNAR1	395665	1:106613562:106632348	black	0.357434	0.190887	0.245891	0.377026	-0.0979977	0.72825	0.0559079	0.843124	0.186717	0.505209	-0.0137715	0.961149	0.147713	0.599336	0.0743004	0.792425	0.131284	0.640945	-0.516264	0.0488164	-0.00125374	0.996462	-0.314748	0.253205	0.062992	0.823518	0.240881	0.387131	0.0905946	0.74814	0.00555718	0.984318	0.237552	0.393925	-0.373609	0.170144	-0.641963	0.00987503	-0.102342	0.716652	0.100731	0.720946	0.152646	0.587057
ENSGALG00000000863	ENSGALG00000000863	DYRK3	419846	1:2516995:2523234	black	-0.35443	0.194912	-0.398957	0.140727	0.0967607	0.731563	-0.218566	0.433862	-0.132917	0.636761	-0.0604258	0.83061	-0.283237	0.306331	-0.149318	0.59533	-0.134786	0.631987	0.211963	0.448216	0.117946	0.675479	0.692349	0.0042297	-0.14119	0.615728	-0.0770352	0.784947	-0.0783479	0.781364	-0.157638	0.574736	-0.104191	0.711732	0.715815	0.0026903	-0.055373	0.844608	-0.0561934	0.842332	-0.157908	0.574073	-0.0120191	0.96609
ENSGALG00000001000	ENSGALG00000001000	HSPA5	396487	-1:9890855:9894996	black	-0.350542	0.200201	-0.508789	0.0527641	0.190974	0.495372	-0.348894	0.20247	-0.142135	0.613344	-0.0294659	0.916977	-0.367878	0.177316	-0.32197	0.241881	-0.129618	0.645224	-0.126653	0.652862	-0.00173736	0.995097	0.22834	0.413053	-0.24422	0.380381	-0.35252	0.197499	0.195054	0.486028	-0.218645	0.433692	0.0506769	0.857657	0.253415	0.362122	0.0843263	0.765098	-0.119797	0.670649	-0.237747	0.393525	-0.173434	0.536479
ENSGALG00000014775	ENSGALG00000014775	NA	NA	NA:NA:NA	black	-0.350537	0.200207	-0.263646	0.342387	-0.0068508	0.980668	-0.28835	0.2973	0.17313	0.537204	-0.173771	0.535676	0.0598089	0.832317	-0.188357	0.50141	0.14113	0.615879	0.173931	0.535294	0.212723	0.446554	0.441253	0.0996636	-0.406744	0.132428	-0.260587	0.348224	0.527206	0.0434363	0.0562135	0.842277	0.0421161	0.881531	0.0879864	0.755184	0.0800911	0.776612	0.447673	0.0942627	0.0974907	0.729607	0.0491071	0.862027
ENSGALG00000042607	ENSGALG00000042607	RSPO3	421715	-1:59341241:59399436	black	-0.348864	0.202512	-0.221189	0.428227	0.30568	0.267873	-0.193583	0.489387	-0.191412	0.494364	0.0126439	0.964329	-0.277969	0.315802	0.0291574	0.917844	-0.348281	0.203319	-0.186457	0.505813	0.542329	0.0367407	0.285738	0.301895	0.000376769	0.998937	0.0141194	0.960169	0.405078	0.134175	-0.268299	0.333615	-0.195478	0.485062	0.321814	0.242123	-0.173287	0.536828	0.201369	0.471732	-0.0349653	0.901546	-0.0324238	0.908674
ENSGALG00000024391	ENSGALG00000024391	CACTIN	420073	1:1133936:1138442	black	-0.347072	0.204998	-0.403548	0.135793	0.0101372	0.971397	-0.412324	0.126691	0.0970812	0.730704	-0.133496	0.635281	-0.234618	0.399966	-0.042847	0.879489	-0.135564	0.630002	0.160526	0.567657	0.0426045	0.880166	0.668237	0.00646839	-0.226395	0.417151	0.00389762	0.989001	-0.0787342	0.780311	-0.309552	0.261549	0.0130725	0.96312	0.646444	0.00921238	-0.227165	0.415526	0.024292	0.93152	0.0455277	0.872004	0.0721297	0.798373
ENSGALG00000019228	ENSGALG00000019228	SFT2D2	418373	-1:85232196:85239081	black	-0.345767	0.206822	-0.434715	0.105382	0.382016	0.159974	-0.255374	0.358297	-0.309397	0.2618	0.310266	0.260392	-0.301389	0.274989	-0.304894	0.269168	-0.299682	0.277851	0.0927455	0.742345	0.429312	0.110277	0.374622	0.168897	-0.220217	0.430311	0.179646	0.521751	-0.040356	0.886452	-0.173829	0.535537	-0.227814	0.41416	0.673798	0.00588418	-0.106669	0.705156	-0.0632253	0.822874	-0.210425	0.451593	-0.0696995	0.805043
ENSGALG00000007351	ENSGALG00000007351	MTPAP	420478	-1:14995874:15011632	black	-0.344921	0.208009	-0.401933	0.137515	0.111793	0.691619	-0.227703	0.414392	-0.201474	0.471496	0.0860127	0.760526	-0.269959	0.330518	-0.189839	0.497986	-0.173638	0.535992	0.113295	0.687667	0.148101	0.598365	0.623344	0.0130368	-0.168166	0.54911	-0.0724868	0.797394	-0.0445499	0.874733	-0.140785	0.616752	-0.195309	0.485448	0.64212	0.00985117	-0.182425	0.51522	-0.054316	0.847542	-0.153722	0.584391	-0.0162274	0.954227
ENSGALG00000033478	ENSGALG00000033478	NA	NA	NA:NA:NA	black	0.344141	0.209108	0.302068	0.273856	-0.264341	0.341069	0.177653	0.526456	0.340037	0.214949	-0.365135	0.180818	0.29378	0.287884	0.0835167	0.767295	0.251627	0.365634	0.0319084	0.91012	0.236664	0.395748	-0.502724	0.0561346	-0.0607171	0.829804	-0.183647	0.51236	0.20133	0.47182	0.212599	0.446825	0.261079	0.347282	-0.126187	0.654066	0.2385	0.391983	0.118584	0.673813	0.2001	0.474588	-0.453384	0.0896348
ENSGALG00000038768	ENSGALG00000038768	FAM20C	416445	1:2130706:2182145	black	-0.343702	0.209728	-0.390833	0.14975	0.386699	0.154488	-0.271515	0.327629	-0.154511	0.582441	-0.0533898	0.850115	-0.169672	0.545487	-0.326688	0.234655	-0.145536	0.604787	0.0982219	0.72765	0.407489	0.131653	0.310224	0.260459	-0.347348	0.204614	-0.210736	0.45091	0.43827	0.102244	-0.0413544	0.88366	-0.132168	0.63868	0.279444	0.313132	-0.0267023	0.924743	0.367934	0.177245	-0.121176	0.667058	-0.095523	0.734882
ENSGALG00000021238	ENSGALG00000021238	CYP2W1	416453	1:2656528:2663612	black	-0.342409	0.21156	-0.378655	0.16399	0.0148676	0.958059	-0.424833	0.114454	0.0196241	0.944659	0.455967	0.0875952	-0.20692	0.459337	-0.137032	0.626267	-0.0994845	0.724274	-0.335948	0.220871	-0.119471	0.6715	0.218573	0.433848	-0.225865	0.418272	-0.145372	0.605198	0.0605616	0.830234	-0.277653	0.316374	0.0103346	0.970841	0.105745	0.707605	-0.0182255	0.948598	-0.226813	0.41627	0.00816641	0.976957	-0.00393046	0.988908
ENSGALG00000025747	ENSGALG00000025747	NQO2	420886	-1:66356656:66365541	black	-0.34159	0.212726	-0.295934	0.284197	0.0341292	0.90389	-0.149282	0.595419	-0.0355882	0.8998	0.131357	0.640759	-0.154184	0.583248	-0.0745487	0.791746	-0.0756708	0.788676	0.249733	0.369375	0.051167	0.856294	0.424984	0.114311	-0.112376	0.690084	-0.181462	0.517478	-0.0857065	0.761355	-0.0910162	0.747003	-0.0580501	0.837186	0.461793	0.0831164	0.655012	0.00804231	-0.157937	0.574001	-0.0652791	0.817209	-0.11308	0.688234
ENSGALG00000034910	ENSGALG00000034910	ZDHHC18	419575	1:1891058:1902151	black	-0.341461	0.21291	-0.301793	0.274314	0.334454	0.223059	-0.123636	0.660668	-0.27192	0.32688	0.0154059	0.956542	-0.208493	0.455853	-0.278531	0.314782	-0.199116	0.47681	0.174994	0.532763	0.6802	0.00526393	0.416998	0.122019	-0.191423	0.494341	0.0973635	0.729948	0.358753	0.189137	-0.0222902	0.937153	-0.211895	0.448366	0.632671	0.0113678	-0.184061	0.511395	0.222406	0.425625	-0.197501	0.480464	-0.11402	0.685764
ENSGALG00000039483	ENSGALG00000039483	NA	NA	NA:NA:NA	black	-0.340954	0.213634	-0.468356	0.0782689	0.18254	0.514951	-0.216261	0.438847	-0.263183	0.343267	-0.184361	0.510693	-0.36864	0.176351	-0.338272	0.217491	-0.0710265	0.801399	0.0851595	0.762838	-0.00490811	0.98615	0.377531	0.165348	-0.192137	0.492701	-0.12777	0.64998	-0.0644738	0.819429	-0.114215	0.68525	0.0110426	0.968844	0.461651	0.0832235	-0.0698281	0.80469	-0.122613	0.663324	-0.352185	0.197955	-0.0776948	0.783146
ENSGALG00000013207	ENSGALG00000013207	CTNNAL1	100858912	1:88491627:88549212	black	-0.339835	0.215239	-0.449864	0.0924679	0.192811	0.491154	-0.314445	0.253686	-0.210911	0.450525	0.536293	0.0393134	-0.291901	0.291123	-0.28735	0.299054	-0.199615	0.475682	-0.0927907	0.742224	-0.117035	0.677862	0.0965522	0.732122	-0.204204	0.465382	-0.30019	0.276998	-0.0589865	0.834593	-0.190241	0.497059	-0.147178	0.600674	0.230454	0.40862	0.31586	0.25144	-0.269039	0.332233	-0.171819	0.540338	-0.230616	0.408282
ENSGALG00000045105	ENSGALG00000045105	NA	NA	NA:NA:NA	black	-0.339777	0.215322	-0.243976	0.380871	0.0298604	0.91587	-0.106172	0.706473	-0.074377	0.792216	-0.19109	0.495106	-0.0550846	0.845409	-0.155364	0.580334	0.000501797	0.998584	0.29135	0.292076	0.313754	0.254789	0.815923	0.000207971	-0.189426	0.49894	0.0514723	0.855444	0.206853	0.459486	0.0578672	0.837693	-0.114195	0.685303	0.584477	0.0221249	-0.0785865	0.780713	0.098588	0.726671	-0.0836137	0.767032	0.185307	0.508489
ENSGALG00000012873	ENSGALG00000012873	SERPINB5	420900	-1:67749398:67762854	black	-0.338799	0.216731	-0.160544	0.567613	0.300998	0.275642	-0.0898918	0.750036	-0.179852	0.521264	-0.146614	0.602085	-0.155347	0.580377	-0.125007	0.657117	-0.196154	0.483523	0.452029	0.0907179	0.50539	0.0546342	0.30265	0.272886	-0.0801122	0.776555	-0.0560845	0.842634	0.482059	0.0688045	-0.0195843	0.94477	-0.247735	0.373343	0.484991	0.066892	-0.168131	0.549195	0.550659	0.0333996	-0.08723	0.75723	-0.179833	0.52131
ENSGALG00000002690	ENSGALG00000002690	PDPR	415683	-1:1783777:1801364	black	-0.338056	0.217805	-0.247888	0.373038	0.193585	0.489382	-0.102153	0.717154	-0.218152	0.434757	-0.113053	0.688305	-0.137885	0.624099	-0.0808201	0.774627	-0.200807	0.472996	0.313614	0.255012	0.17855	0.524335	0.756856	0.00108861	-0.086379	0.759533	0.0124723	0.964812	-0.0256494	0.927703	-0.0337033	0.905085	-0.276721	0.318069	0.636794	0.0106852	-0.0065679	0.981466	0.0120528	0.965995	-0.0999131	0.723129	0.125887	0.654843
ENSGALG00000016241	ENSGALG00000016241	ATP6AP2	418573	-1:113578487:113587894	black	-0.33778	0.218204	-0.329341	0.230653	0.187494	0.503407	-0.218116	0.434835	-0.184006	0.511524	0.127902	0.649642	-0.224822	0.420482	-0.106808	0.704789	-0.12964	0.645167	-0.0986211	0.726582	0.0836557	0.766918	0.558417	0.030498	-0.120606	0.668541	0.142799	0.61167	-0.0887274	0.753181	-0.16251	0.562815	-0.114298	0.685035	0.319244	0.246117	-0.208766	0.45525	-0.0308183	0.91318	-0.128004	0.649377	0.280239	0.3117
ENSGALG00000017169	ENSGALG00000017169	ELMOD1	418971	-1:181839724:181881942	black	-0.336865	0.219533	-0.277374	0.316882	-0.242337	0.38418	-0.202138	0.470006	-0.0996772	0.723759	0.0994617	0.724335	-0.151788	0.589185	-0.117153	0.677553	-0.0321133	0.909545	0.110069	0.696165	0.0387569	0.890926	0.456796	0.0869479	-0.159233	0.570821	-0.0432201	0.878447	-0.0599105	0.832035	-0.0766171	0.78609	-0.146494	0.602385	0.537833	0.0386445	-0.199653	0.475596	-0.158219	0.573308	-0.0516874	0.854846	-0.103972	0.712316
ENSGALG00000027838	ENSGALG00000027838	HMG20B	426515	-1:1148165:1152946	black	-0.33618	0.220531	-0.260401	0.34858	0.248892	0.371042	-0.164361	0.558314	-0.093869	0.739324	-0.255558	0.357938	-0.199882	0.475079	-0.140967	0.616293	-0.14002	0.618686	0.0716899	0.799579	0.583387	0.0224352	0.324248	0.238376	-0.158954	0.571505	-0.213445	0.444974	0.668677	0.00642065	-0.0822092	0.770848	-0.0889055	0.7527	0.289161	0.295883	-0.109607	0.697385	0.494793	0.0607768	-0.079891	0.777157	-0.124785	0.657692
ENSGALG00000037776	ENSGALG00000037776	TMCO6	416135	-1:1605141:1611755	black	0.334773	0.222591	0.336216	0.220479	-0.312536	0.256737	0.253945	0.361085	0.0756846	0.788638	-0.609891	0.0157719	0.26291	0.343786	0.26039	0.3486	0.0325172	0.908412	-0.0223703	0.936927	-0.191002	0.495308	0.214322	0.443062	0.118182	0.674862	-0.30419	0.270332	-0.24024	0.388435	0.215208	0.441134	-0.115695	0.68137	0.268183	0.333834	-0.242092	0.384675	-0.297144	0.28214	0.177761	0.5262	-0.234707	0.399781
ENSGALG00000026499	ENSGALG00000026499	TNFRSF25	425564	1:604215:606588	black	-0.334374	0.223176	-0.570879	0.0262399	0.0694164	0.805821	-0.198096	0.479116	-0.137819	0.624268	0.166427	0.553309	-0.453589	0.0894719	-0.318148	0.247834	0.0850032	0.763262	0.169364	0.546227	-0.214756	0.442117	0.624742	0.0127753	-0.110753	0.694361	0.0106865	0.969848	-0.394554	0.145571	-0.185878	0.50716	0.177824	0.526052	0.537757	0.0386775	0.163865	0.55952	-0.24673	0.375349	-0.420211	0.118876	0.177563	0.526667
ENSGALG00000027484	ENSGALG00000027484	C20orf85	419321	-1:11271341:11303516	black	-0.334194	0.223442	-0.277191	0.317213	0.0749918	0.790533	-0.198106	0.479094	-0.182597	0.514818	-0.0306144	0.913752	-0.225108	0.419875	-0.136125	0.628574	-0.179363	0.522416	-0.0931751	0.74119	0.354836	0.194364	0.192187	0.492586	-0.141923	0.613877	-0.271382	0.327876	0.477032	0.0721755	-0.116558	0.67911	-0.196587	0.482538	0.206096	0.461167	-0.220135	0.430487	0.253554	0.36185	-0.0709831	0.801518	-0.197696	0.480022
ENSGALG00000015356	ENSGALG00000015356	IFT57	418409	-1:88731807:88749184	black	-0.333325	0.224723	-0.383737	0.157942	0.0681521	0.809297	-0.192227	0.492493	-0.0324538	0.90859	-0.00090598	0.997443	-0.241755	0.385358	-0.158283	0.573151	-0.0579168	0.837555	0.217285	0.436629	0.335518	0.221499	0.73227	0.0019077	-0.161995	0.56407	0.0885805	0.753578	-0.0168836	0.952378	-0.139619	0.619702	0.0108799	0.969303	0.788789	0.000473926	0.0605762	0.830194	-0.066545	0.813721	-0.142224	0.613119	0.0425754	0.880247
ENSGALG00000046384	ENSGALG00000046384	LRRC46	776636	-1:6526159:6528918	black	0.33297	0.225246	0.395005	0.145069	-0.404294	0.135002	0.144083	0.608437	0.485668	0.066456	-0.00765453	0.978401	0.582928	0.0225671	0.170059	0.544557	0.453097	0.0898639	0.0759924	0.787797	-0.269642	0.331108	-0.123864	0.660077	-0.127077	0.65177	0.15373	0.584372	-0.232634	0.404077	0.331546	0.227359	0.250067	0.368714	-0.377505	0.165379	0.276141	0.319126	-0.0561963	0.842324	0.370906	0.173502	0.192175	0.492612
ENSGALG00000014841	ENSGALG00000014841	HDDC2	421719	1:60103490:60136557	black	-0.33245	0.226017	-0.327623	0.233241	0.147782	0.599164	-0.266901	0.336239	-0.217341	0.436509	0.0341552	0.903817	-0.236	0.397114	-0.15642	0.577732	-0.132217	0.638554	-0.00733759	0.979295	-0.169633	0.545581	0.253919	0.361136	-0.183732	0.512164	-0.186268	0.506253	-0.175862	0.530699	-0.132072	0.638926	-0.157212	0.575783	0.325862	0.235911	-0.197172	0.481209	-0.0331987	0.9065	-0.132333	0.638256	-0.143487	0.609935
ENSGALG00000028147	ENSGALG00000028147	CTSK	395818	-1:170395:173324	black	-0.331675	0.227167	-0.353891	0.19564	0.0984847	0.726947	-0.115391	0.682165	-0.0887149	0.753215	0.206625	0.459991	-0.195128	0.48586	-0.225588	0.418858	-0.0180649	0.94905	0.259698	0.349931	0.179455	0.5222	0.433909	0.106102	-0.151381	0.590197	-0.0686932	0.807809	-0.0777625	0.782962	-0.038348	0.89207	0.00930658	0.97374	0.571473	0.026049	0.636659	0.010707	-0.226786	0.416325	-0.200854	0.472891	-0.118062	0.675177
ENSGALG00000011483	ENSGALG00000011483	MPC1L	428592	1:42945334:42953613	black	-0.331499	0.227428	-0.35814	0.189949	-0.153463	0.585033	-0.353202	0.196572	-0.0783567	0.78134	0.020044	0.943476	-0.142583	0.612214	-0.169526	0.545837	-0.0785988	0.78068	0.0188577	0.946817	-0.217504	0.436157	0.330969	0.228218	-0.296719	0.282862	-0.273918	0.323196	-0.1172	0.67743	-0.120974	0.667585	-0.143993	0.608662	0.363504	0.18292	-0.164247	0.558591	-0.178844	0.52364	-0.00139666	0.996059	-0.177906	0.525857
ENSGALG00000009790	ENSGALG00000009790	RAB33B	422441	1:29304171:29311186	black	-0.330778	0.228503	-0.0620269	0.826184	-0.109134	0.698635	0.109364	0.698025	-0.171326	0.541518	-0.196384	0.482999	-0.207242	0.458622	0.192694	0.491422	-0.140594	0.617233	0.26344	0.342778	0.151831	0.589077	0.584369	0.0221555	0.283957	0.30505	-0.0860851	0.76033	0.276503	0.318466	-0.0845181	0.764578	-0.216478	0.438376	0.240655	0.387591	0.159641	0.569822	0.172084	0.539703	-0.0858704	0.760911	0.203604	0.466722
ENSGALG00000004702	ENSGALG00000004702	WDR34	417211	-1:5557660:5565731	black	-0.330687	0.228638	-0.316209	0.250888	0.0552483	0.844954	-0.14335	0.610282	-0.268952	0.332396	0.361719	0.18524	-0.241089	0.386709	-0.142961	0.61126	-0.156172	0.578342	0.0376316	0.894076	-0.181256	0.517964	0.402518	0.136889	-0.0538229	0.848911	-0.199862	0.475125	-0.267954	0.334263	-0.094228	0.738359	-0.234235	0.400757	0.462419	0.0826449	0.200163	0.474446	-0.361346	0.185728	-0.18526	0.508599	-0.132276	0.638404
ENSGALG00000040666	ENSGALG00000040666	ATP6V0A4	418104	1:56329183:56352026	black	-0.330249	0.229293	-0.343026	0.210684	0.113596	0.686878	-0.312253	0.257191	-0.0149684	0.957775	-0.10771	0.7024	-0.111387	0.692688	-0.13478	0.632003	-0.156913	0.576518	0.262019	0.345485	0.185214	0.508705	0.6097	0.0158136	-0.305888	0.267531	-0.120579	0.668612	-0.0243561	0.93134	-0.114955	0.68331	-0.14474	0.606785	0.72564	0.00219733	-0.010741	0.969695	0.0167111	0.952864	0.031017	0.912622	-0.133543	0.635163
ENSGALG00000014977	ENSGALG00000014977	GSK3B	418335	1:80750811:80886512	black	-0.330017	0.229639	-0.33718	0.219075	0.0430816	0.878833	-0.223581	0.423119	-0.0692577	0.806257	-0.0697767	0.804831	-0.180198	0.520451	-0.11096	0.693814	-0.106748	0.704947	0.197769	0.479858	0.136588	0.627395	0.703682	0.00341709	-0.186384	0.505984	-0.0659793	0.815279	-0.0751207	0.79018	-0.113614	0.686829	-0.116281	0.679834	0.712617	0.00286853	-0.0641562	0.820305	-0.0604685	0.830492	-0.0655077	0.816579	-0.0196504	0.944584
ENSGALG00000009328	ENSGALG00000009328	EIF3A	423927	-1:30925510:30953116	black	-0.328203	0.232365	-0.382987	0.158826	0.276823	0.317883	-0.284814	0.30353	-0.102157	0.717143	0.465319	0.0804862	-0.221238	0.428121	-0.27215	0.326453	-0.0831121	0.768394	0.0703367	0.803293	0.205522	0.462444	0.562413	0.0290799	-0.181043	0.518464	0.605662	0.0167172	-0.205983	0.461418	-0.196372	0.483027	0.0497806	0.860152	0.556948	0.0310322	-0.164852	0.557122	-0.244091	0.38064	-0.196271	0.483256	0.402497	0.136911
ENSGALG00000012699	ENSGALG00000012699	MCUR1	420837	-1:60595560:60610916	black	-0.327803	0.232968	-0.343993	0.209316	-0.0226291	0.936199	-0.170986	0.542332	-0.02479	0.93012	-0.0358041	0.899195	-0.183378	0.512989	-0.108889	0.699281	0.00443781	0.987477	0.227822	0.414142	0.0129439	0.963482	0.663951	0.00694923	-0.156571	0.57736	-0.134974	0.631508	-0.144632	0.607057	-0.0793124	0.778734	-0.0164881	0.953493	0.595993	0.0190417	0.2344	0.400415	-0.0982009	0.727706	-0.1078	0.702161	-0.00129046	0.996358
ENSGALG00000000978	ENSGALG00000000978	CEP104	419379	1:923773:935424	black	-0.327115	0.234009	-0.279014	0.31391	0.0596025	0.832888	-0.32981	0.22995	-0.05187	0.854339	-0.11501	0.683166	-0.132607	0.637555	-0.0378885	0.893357	-0.224332	0.421523	0.0976789	0.729103	0.155995	0.578779	0.275539	0.320225	-0.238875	0.391219	-0.281988	0.308561	0.263679	0.342325	-0.175248	0.532158	-0.249088	0.370654	0.25376	0.361447	-0.246733	0.375342	0.363908	0.182398	0.120916	0.667736	-0.149099	0.595876
ENSGALG00000016267	ENSGALG00000016267	PHF3	428641	-1:85591557:85628914	black	-0.326929	0.23429	-0.37642	0.166697	-0.0537641	0.849075	-0.205919	0.461559	-0.0334749	0.905725	0.220638	0.429407	-0.227405	0.415019	-0.170715	0.542981	0.0357801	0.899263	-0.0309038	0.91294	0.117003	0.677945	0.477617	0.071777	-0.187556	0.503265	-0.186714	0.505219	0.0095738	0.972987	-0.103372	0.713909	0.00670427	0.981082	0.468455	0.0781972	0.0922006	0.743812	-0.0706818	0.802346	-0.128739	0.647486	-0.108414	0.700538
ENSGALG00000004916	ENSGALG00000004916	DRC3	416510	1:5371507:5386809	black	-0.326119	0.23552	-0.0819191	0.771637	0.0437903	0.876854	0.040096	0.887179	-0.477298	0.0719942	-0.0194415	0.945173	-0.260978	0.347475	0.124656	0.658025	-0.402842	0.136544	0.280799	0.310693	-0.0461724	0.870206	0.2353	0.398558	0.228868	0.411943	-0.209507	0.453616	-0.082878	0.769031	-0.104424	0.711113	-0.57522	0.024868	0.373271	0.170561	-0.127705	0.650148	0.0702516	0.803527	-0.105822	0.707403	-0.201657	0.471086
ENSGALG00000006586	ENSGALG00000006586	PLAGL2	100859766	-1:10136327:10140317	black	-0.321422	0.242729	-0.215695	0.440074	-0.00316235	0.991076	-0.149969	0.593707	-0.0431509	0.87864	-0.151962	0.588752	-0.178918	0.523466	0.0943916	0.737919	-0.213888	0.444008	0.288198	0.297567	0.229601	0.410406	0.68185	0.00511275	-0.0115316	0.967465	-0.0358289	0.899126	0.00283376	0.992003	-0.182481	0.515089	-0.187761	0.502789	0.706598	0.00322956	0.0228922	0.935458	0.03957	0.888651	0.0342489	0.903555	-0.0138194	0.961014
ENSGALG00000012684	ENSGALG00000012684	DEK	420828	1:60324519:60341971	black	-0.321417	0.242737	-0.331801	0.226979	0.0322458	0.909173	-0.239774	0.389384	-0.0066432	0.981254	0.0602353	0.831137	-0.0541056	0.848126	-0.209261	0.454159	0.00458352	0.987065	0.275124	0.320984	0.0640723	0.820537	0.693625	0.00413118	-0.310147	0.260585	-0.0647508	0.818665	-0.101657	0.718476	0.00273143	0.992292	-0.0837239	0.766733	0.662017	0.00717516	0.0900028	0.749737	-0.0991201	0.725248	-0.0411033	0.884362	-0.00671449	0.981053
ENSGALG00000039351	ENSGALG00000039351	NA	NA	NA:NA:NA	black	-0.32131	0.242903	-0.369231	0.175605	0.0896973	0.750561	-0.2973	0.281874	-0.0471157	0.867576	-0.106434	0.705779	-0.207069	0.459006	-0.0261918	0.926178	-0.215877	0.439679	0.118636	0.673677	0.0588091	0.835084	0.717872	0.00258038	-0.158673	0.572195	0.0319028	0.910136	-0.165286	0.556071	-0.245275	0.378262	-0.111498	0.692398	0.577227	0.0242525	-0.0117046	0.966977	-0.116581	0.679049	0.00185446	0.994767	0.186728	0.505185
ENSGALG00000011035	ENSGALG00000011035	AK4	424697	1:28615900:28626590	black	-0.320837	0.243637	-0.261263	0.34693	0.0592292	0.833921	-0.0974039	0.72984	-0.0721462	0.798328	0.112533	0.689672	-0.114916	0.683411	-0.055006	0.845627	-0.0706744	0.802366	0.309429	0.261747	-0.0687964	0.807526	0.542006	0.0368752	-0.0656813	0.8161	-0.0971777	0.730445	-0.174083	0.534932	-0.0497284	0.860297	-0.0965497	0.732128	0.387391	0.153688	0.648755	0.00888436	-0.18088	0.518846	-0.0794162	0.778451	0.0943828	0.737943
ENSGALG00000012219	ENSGALG00000012219	UNC5C	395101	-1:58597982:58837212	black	-0.319948	0.245019	-0.294353	0.286901	0.0256269	0.927766	-0.283161	0.306467	-0.222584	0.425245	-0.117758	0.67597	-0.240984	0.386922	-0.0673626	0.81147	-0.18171	0.516897	0.049646	0.860526	-0.345067	0.207803	0.0551327	0.845275	-0.14112	0.615904	-0.273998	0.32305	-0.233223	0.402854	-0.181553	0.517265	-0.202142	0.469998	0.140643	0.617111	-0.172886	0.537786	0.0158342	0.955335	-0.0636013	0.821836	-0.190683	0.496041
ENSGALG00000037638	ENSGALG00000037638	NA	NA	NA:NA:NA	black	0.319014	0.246477	0.244455	0.379908	-0.104698	0.710386	0.062259	0.825543	0.227022	0.415828	0.120062	0.669959	0.138495	0.62255	0.127568	0.650501	0.112371	0.690099	-0.505113	0.0547888	-0.0537013	0.849249	-0.419256	0.119804	0.137562	0.624919	0.24762	0.373572	0.157629	0.574757	-0.0495902	0.860682	0.280873	0.31056	-0.625587	0.0126192	-0.222119	0.426238	-0.12978	0.644807	0.124937	0.657297	0.27633	0.318781
ENSGALG00000016215	ENSGALG00000016215	DIPK2B	418555	1:112117781:112133306	black	-0.318541	0.247218	-0.139701	0.619495	-0.121315	0.666696	-0.0872948	0.757054	-0.242804	0.383235	-0.0820561	0.771264	-0.0993914	0.724523	0.0339696	0.904338	-0.243787	0.381252	0.303123	0.272099	0.0725309	0.797273	0.348967	0.202369	-0.0250229	0.929465	-0.0931626	0.741223	-0.0265299	0.925227	-0.0511398	0.856369	-0.404269	0.135029	0.419216	0.119842	-0.0464268	0.869497	0.0157514	0.955569	0.0261756	0.926223	-0.10932	0.698142
ENSGALG00000045372	ENSGALG00000045372	NA	NA	NA:NA:NA	black	-0.318322	0.247562	-0.264915	0.339983	-0.108717	0.699736	-0.110157	0.695933	-0.0641346	0.820365	-0.136453	0.627739	-0.199568	0.475788	0.00549123	0.984504	-0.0616278	0.827287	0.217939	0.435216	0.0224207	0.936785	0.699905	0.00367264	-0.0253381	0.928578	-0.155808	0.57924	-0.0379233	0.893259	-0.104719	0.710329	-0.107827	0.702091	0.552373	0.0327414	0.0601092	0.831486	-0.0358941	0.898943	-0.0743792	0.79221	0.0415897	0.883002
ENSGALG00000012044	ENSGALG00000012044	ANK2	422689	-1:56725180:57009349	black	0.316809	0.24994	0.328971	0.231209	-0.39683	0.143053	0.0947552	0.736943	0.342855	0.210927	-0.440699	0.100139	0.402953	0.136426	0.136506	0.627605	0.294027	0.287461	-0.0537392	0.849144	-0.0933918	0.740607	-0.101333	0.719342	-0.0687452	0.807666	0.123707	0.660485	0.168774	0.547646	0.212234	0.447624	0.182582	0.514853	-0.433348	0.106606	-0.430615	0.109083	0.166775	0.552468	0.291628	0.291594	0.257597	0.353982
ENSGALG00000015066	ENSGALG00000015066	WASF1	421761	1:66714941:66745219	black	-0.314552	0.253516	-0.208535	0.455761	0.0951355	0.735922	0.0074822	0.978887	-0.179755	0.521494	0.168203	0.549021	-0.127479	0.65073	-0.061837	0.826708	-0.129176	0.646361	0.352544	0.197466	0.156543	0.577429	0.512602	0.0507219	0.00371233	0.989524	-0.0136249	0.961563	-0.118864	0.673081	-0.00276698	0.992191	-0.190769	0.495843	0.526346	0.0438427	0.639562	0.0102451	-0.188283	0.501581	-0.131397	0.640657	0.00382368	0.98921
ENSGALG00000039145	ENSGALG00000039145	CA8	421139	-1:112701443:112753254	black	-0.31427	0.253965	-0.315478	0.252046	0.302165	0.273695	-0.212924	0.446114	-0.230187	0.409178	-0.269705	0.330991	-0.196627	0.482448	-0.119358	0.671793	-0.21843	0.434156	0.41953	0.119537	-0.208807	0.455161	0.504991	0.0548568	-0.102502	0.716226	0.151398	0.590154	-0.207045	0.459059	-0.140394	0.617741	-0.182259	0.515609	0.204275	0.465224	-0.0745996	0.791606	0.14904	0.596024	-0.130974	0.641742	0.415705	0.123299
ENSGALG00000008504	ENSGALG00000008504	HNRNPLL	416702	-1:16580199:16608452	black	-0.313508	0.25518	-0.0941339	0.738612	0.172464	0.538796	-0.159938	0.569095	-0.143117	0.610869	0.514417	0.0497711	0.00925253	0.973893	0.0234219	0.933968	-0.28448	0.304122	0.0393025	0.889399	0.208634	0.455542	0.098854	0.725959	-0.0937122	0.739745	0.0743407	0.792315	-0.102225	0.716964	-0.0889208	0.752658	-0.306579	0.266396	0.344982	0.207924	0.527486	0.0433045	-0.26906	0.332193	0.108195	0.701117	-0.178772	0.52381
ENSGALG00000040954	ENSGALG00000040954	GPR37	417748	1:21985328:21998153	black	-0.313458	0.255261	-0.357811	0.190386	0.234601	0.400001	-0.154016	0.583664	-0.47204	0.0756383	0.052994	0.851214	-0.391903	0.14854	-0.230276	0.408992	-0.309645	0.261397	-0.131856	0.639479	-0.0384253	0.891854	-0.00322614	0.990896	-0.0487526	0.863014	-0.414351	0.12465	0.0639466	0.820884	-0.141962	0.613779	-0.3074	0.265051	0.18896	0.500015	-0.0931997	0.741123	-0.0840235	0.76592	-0.293727	0.287976	-0.34522	0.207588
ENSGALG00000042791	ENSGALG00000042791	NA	NA	NA:NA:NA	black	-0.312563	0.256693	-0.204948	0.463722	-0.0220451	0.937843	-0.103742	0.712927	-0.0648927	0.818274	0.127166	0.651538	-0.0421472	0.881444	-0.0353367	0.900505	-0.0906488	0.747994	0.252809	0.36331	0.0104321	0.970566	0.440719	0.100122	-0.112605	0.689482	-0.160461	0.567815	-0.137993	0.623824	-0.0114534	0.967686	-0.158554	0.572487	0.443022	0.0981538	0.64576	0.00931113	-0.247503	0.373806	-0.00143328	0.995955	-0.0956836	0.734451
ENSGALG00000015030	ENSGALG00000015030	NPC1	421076	-1:103049116:103074569	black	-0.312446	0.256881	-0.46803	0.0785048	0.167164	0.551527	-0.367915	0.177269	0.0602217	0.831175	0.477032	0.0721756	-0.286255	0.300983	-0.247639	0.373534	0.0556055	0.843963	-0.12415	0.659337	-0.225411	0.419234	0.250227	0.368398	-0.211894	0.448369	0.0318451	0.910298	-0.191962	0.493101	-0.261148	0.347149	0.251132	0.366609	0.122516	0.663575	0.303417	0.271612	-0.222096	0.426285	-0.176662	0.528801	0.167651	0.550354
ENSGALG00000010985	ENSGALG00000010985	ATG4C	424688	1:27947422:27969461	black	-0.311918	0.257729	-0.283613	0.305661	-0.032381	0.908794	-0.146309	0.602849	-0.0728188	0.796484	-0.0776767	0.783196	-0.163106	0.561364	-0.081519	0.772725	-0.0549437	0.8458	0.244435	0.379949	0.118256	0.674669	0.699333	0.00371268	-0.128617	0.647798	-0.0947381	0.736989	-0.0588924	0.834853	-0.0622079	0.825684	-0.125396	0.656112	0.686074	0.00474146	-0.0569774	0.840159	-0.0190001	0.946416	-0.0778174	0.782812	-0.0316102	0.910957
ENSGALG00000040702	ENSGALG00000040702	BCKDHB	395375	-1:79052924:79163325	black	-0.310533	0.259961	-0.3133	0.255513	0.129494	0.645542	-0.0961052	0.73332	-0.129374	0.645851	0.213133	0.445656	-0.199258	0.476489	-0.16088	0.566792	-0.0894923	0.751115	0.329251	0.230787	0.0749891	0.79054	0.384278	0.157308	-0.0932392	0.741017	-0.11591	0.680805	-0.188025	0.502178	-0.0570617	0.839925	-0.0804488	0.775638	0.579126	0.0236808	0.635137	0.0109555	-0.206255	0.460814	-0.174429	0.534108	-0.171874	0.540207
ENSGALG00000012229	ENSGALG00000012229	RPS29	776054	-1:57737586:57738431	black	-0.309446	0.26172	-0.361639	0.185345	0.146653	0.601987	-0.411105	0.12793	-0.0337004	0.905093	0.450997	0.0915493	-0.158917	0.571596	-0.156539	0.577437	-0.141124	0.615895	-0.0914301	0.745888	-0.137499	0.625079	0.377064	0.165915	-0.256632	0.35585	0.113261	0.687758	-0.24703	0.37475	-0.239166	0.390623	-0.0752097	0.789937	0.367016	0.178412	-0.177932	0.525796	-0.220883	0.428881	0.0017409	0.995087	0.103316	0.714059
ENSGALG00000012454	ENSGALG00000012454	CYTH4	418043	-1:51385635:51405059	black	0.30855	0.263176	0.396324	0.14361	-0.34635	0.206006	0.0908927	0.747336	0.282932	0.306874	0.0570807	0.839872	0.397675	0.142125	0.328861	0.231374	0.0944467	0.737771	0.0194412	0.945173	-0.480592	0.0697767	-0.220845	0.428965	0.110026	0.69628	0.25731	0.354537	-0.478917	0.070898	0.0721244	0.798387	0.0379105	0.893295	-0.317724	0.2485	0.108772	0.69959	-0.341652	0.212637	0.367837	0.177367	0.207376	0.458325
ENSGALG00000035523	ENSGALG00000035523	NA	NA	NA:NA:NA	black	-0.30771	0.264545	-0.272332	0.326117	-0.119271	0.67202	-0.145199	0.605633	-0.0957411	0.734296	0.0133751	0.962267	-0.210006	0.452517	-0.0156646	0.955813	-0.118012	0.675308	0.162543	0.562736	0.101619	0.718579	0.786296	0.000508174	-0.0134987	0.961918	0.172261	0.539281	-0.150329	0.592811	-0.162775	0.562171	-0.121914	0.665138	0.696147	0.00394187	-0.187836	0.502615	-0.227954	0.413865	-0.0817736	0.772033	0.200046	0.47471
ENSGALG00000043025	ENSGALG00000043025		NA	-1:725593:731173	black	-0.3073	0.265215	-0.347449	0.204474	0.111905	0.691326	-0.399049	0.140626	0.0448097	0.874008	0.244341	0.380137	-0.160397	0.567973	-0.139125	0.620953	-0.0638916	0.821035	-0.126341	0.653669	-0.198789	0.477548	0.314086	0.254258	-0.244325	0.38017	-0.0714962	0.800111	-0.077274	0.784295	-0.225648	0.418731	0.0491264	0.861973	0.199087	0.476875	-0.0225365	0.936459	-0.156483	0.577576	-0.0045712	0.9871	0.0644679	0.819445
ENSGALG00000007021	ENSGALG00000007021	PCNT	424039	-1:7050186:7147718	black	-0.307019	0.265675	-0.429412	0.110185	0.367833	0.177373	-0.32401	0.23874	-0.0809392	0.774303	-0.0685769	0.808129	-0.366918	0.178535	-0.201247	0.472006	-0.19916	0.476709	-0.22994	0.409696	0.420675	0.118427	0.30139	0.274987	-0.17963	0.521787	-0.136183	0.628426	0.471489	0.0760277	-0.290767	0.293087	0.0522475	0.853289	0.242766	0.383313	-0.236232	0.396638	0.264669	0.340448	-0.153322	0.585382	-0.00263283	0.99257
ENSGALG00000009443	ENSGALG00000009443	TMEM168	417777	1:26946875:26968412	black	-0.306636	0.266304	-0.307151	0.265459	0.0137802	0.961125	-0.152479	0.58747	-0.0852419	0.762615	-0.048327	0.8642	-0.1703	0.543978	-0.103726	0.712967	-0.0809179	0.774361	0.214857	0.441897	0.0936642	0.739874	0.674527	0.0058107	-0.137723	0.624512	-0.135959	0.628997	-0.0900792	0.74953	-0.0687169	0.807744	-0.116055	0.680427	0.675516	0.00571232	0.105213	0.709019	-0.121519	0.666165	-0.0947937	0.736839	-0.0554712	0.844336
ENSGALG00000038488	ENSGALG00000038488	GMEB1	769918	-1:2395539:2404208	black	-0.306609	0.266346	-0.240476	0.387954	-0.0480502	0.864971	-0.139353	0.620375	-0.0241273	0.931984	-0.108135	0.701275	-0.178368	0.524766	0.00353626	0.990021	-0.106716	0.705032	0.211029	0.450267	0.289894	0.294605	0.644444	0.00950367	-0.0722117	0.798148	-0.0286386	0.919301	0.00847388	0.976089	-0.128748	0.647461	-0.0916489	0.745298	0.759444	0.00102241	0.00548551	0.98452	-0.0346948	0.902304	-0.0281401	0.920702	-0.0979937	0.728261
ENSGALG00000010401	ENSGALG00000010401	EIF2A	425042	-1:23791276:23804409	black	0.305726	0.267798	0.29126	0.292233	0.192256	0.492427	0.177379	0.527103	0.159745	0.569567	-0.0490747	0.862117	0.216672	0.437955	0.123028	0.662246	0.0687493	0.807655	-0.0324248	0.908671	0.0626519	0.824458	-0.349014	0.202305	0.113373	0.687464	0.260672	0.348061	0.0287162	0.919083	0.0884572	0.753911	0.166317	0.553575	-0.436238	0.104029	0.162747	0.562239	0.150937	0.591299	0.105794	0.707476	0.219357	0.43216
ENSGALG00000040136	ENSGALG00000040136	PSTPIP2	770399	1:2160803:2176161	black	-0.305625	0.267963	-0.408801	0.130294	0.127768	0.649986	-0.221584	0.427382	-0.341959	0.212201	0.199029	0.477006	-0.352194	0.197942	-0.206441	0.460401	-0.254361	0.360272	-0.0180014	0.949229	-0.0678817	0.810041	0.349469	0.201677	-0.0857948	0.761116	-0.0990766	0.725364	-0.141647	0.614573	-0.196459	0.48283	-0.260716	0.347976	0.372318	0.171742	-0.266895	0.33625	-0.139514	0.619968	-0.221533	0.427489	-0.00738079	0.979173
ENSGALG00000002237	ENSGALG00000002237	ATP6V0D1	415674	-1:1372530:1396927	black	-0.305411	0.268317	-0.4858	0.066371	0.0115266	0.967479	-0.296801	0.282721	0.00298339	0.991581	0.0925122	0.742973	-0.325578	0.236344	-0.214545	0.442577	0.0342357	0.903592	0.0498095	0.860071	-0.0862973	0.759755	0.473756	0.0744344	-0.231778	0.405858	-0.280818	0.310659	-0.171954	0.540014	-0.18956	0.49863	0.0981143	0.727938	0.54212	0.0368278	0.0559968	0.842878	-0.0618174	0.826763	-0.17651	0.529162	-0.163713	0.559889
ENSGALG00000011594	ENSGALG00000011594	NR1H4	373902	1:47342861:47375651	black	-0.30503	0.268943	-0.217606	0.435935	0.0286706	0.919211	-0.00723864	0.979574	-0.131818	0.639575	0.120832	0.667953	-0.158228	0.573285	-0.0449064	0.873738	-0.0753874	0.789451	0.269871	0.330683	0.0777174	0.783085	0.419371	0.119691	0.00404361	0.988589	-0.187134	0.504243	-0.0763398	0.786847	-0.0200743	0.943391	-0.125865	0.654899	0.44535	0.0961927	0.648196	0.00896294	-0.149442	0.59502	-0.129699	0.645014	-0.115094	0.682944
ENSGALG00000029863	ENSGALG00000029863	PHYHIPL	423603	-1:1366037:1398417	black	-0.304951	0.269074	-0.184214	0.511036	0.0424291	0.880656	-0.109221	0.698404	-0.0180055	0.949217	-0.204656	0.464374	-0.114322	0.684971	-0.10828	0.700891	-0.0534843	0.849852	0.210485	0.451461	0.418784	0.120264	0.312852	0.25623	-0.127551	0.650546	-0.322202	0.241523	0.611035	0.0155236	-0.00469944	0.986738	-0.086695	0.758678	0.321709	0.242285	0.0611925	0.82849	0.369874	0.174796	-0.0324329	0.908648	-0.233712	0.401841
ENSGALG00000035232	ENSGALG00000035232	NA	NA	NA:NA:NA	black	-0.304659	0.269555	-0.340601	0.21414	0.260183	0.348998	-0.267285	0.335517	-0.244017	0.380788	-0.0535815	0.849582	-0.240272	0.388369	-0.185775	0.507401	-0.200523	0.473636	-0.0871214	0.757524	-0.0210783	0.940564	0.289346	0.29556	-0.188734	0.500538	-0.00641679	0.981893	-0.162665	0.562439	-0.160514	0.567687	-0.109384	0.697973	0.355837	0.19302	-0.140132	0.618403	-0.184378	0.510655	-0.162728	0.562284	-0.0181851	0.948711
ENSGALG00000007963	ENSGALG00000007963	NFATC2	419346	1:13171132:13253864	black	-0.303316	0.271779	-0.339356	0.215927	0.134061	0.633837	-0.256579	0.355953	-0.24571	0.377389	0.124019	0.659677	-0.422086	0.117067	-0.0164971	0.953467	-0.37781	0.165011	-0.168962	0.547195	0.0811802	0.773647	0.329801	0.229964	0.0544797	0.847088	-0.161631	0.564959	0.0878275	0.755613	-0.366895	0.178566	-0.232384	0.404597	0.416932	0.122083	-0.38047	0.161814	-0.0712269	0.800849	-0.117815	0.675822	-0.100085	0.722671
ENSGALG00000040541	ENSGALG00000040541	SLC5A6	100857231	-1:104480205:104484164	black	-0.301335	0.275079	-0.300208	0.276967	-0.012199	0.965583	-0.131416	0.640607	-0.0601109	0.831481	0.0270913	0.923649	-0.160833	0.566906	-0.0982731	0.727513	-0.0463799	0.869627	0.218728	0.433514	0.0516677	0.854901	0.579461	0.0235811	-0.12867	0.647663	-0.189343	0.49913	-0.12938	0.645835	-0.0560763	0.842657	-0.0789618	0.77969	0.616561	0.0143656	0.335074	0.222149	-0.170775	0.542839	-0.0960921	0.733355	-0.117314	0.677131
ENSGALG00000003429	ENSGALG00000003429	PBX1	395505	-1:5588882:5693333	black	-0.301116	0.275445	-0.356337	0.192351	0.34229	0.211729	-0.234307	0.400609	-0.119798	0.670648	0.386171	0.155099	-0.0730124	0.795953	-0.57912	0.0236824	0.0573997	0.838988	0.161279	0.565818	0.465309	0.0804938	-0.0358427	0.899087	-0.390924	0.149647	0.430323	0.109349	0.404662	0.134614	0.0574909	0.838735	0.12781	0.649877	0.0248912	0.929835	0.184064	0.511387	0.062113	0.825946	-0.257727	0.353729	0.194493	0.487308
ENSGALG00000009792	ENSGALG00000009792	LOC422442	422442	-1:29323991:29326742	black	-0.300901	0.275805	-0.239553	0.389833	0.0260129	0.926681	-0.0472922	0.867084	-0.133709	0.634736	-0.178538	0.524362	-0.0650945	0.817718	-0.212691	0.446623	0.0407375	0.885385	0.352108	0.19806	0.223524	0.423241	0.698001	0.00380716	-0.198931	0.477228	-0.0968965	0.731199	0.0781041	0.78203	0.133922	0.634194	-0.135344	0.630565	0.655713	0.00795202	-0.000205914	0.999419	0.0511304	0.856395	-0.154184	0.583248	-0.039852	0.887861
ENSGALG00000033609	ENSGALG00000033609	NACA	396544	1:6876344:6886461	black	-0.298467	0.2799	-0.277715	0.316262	-0.159431	0.570336	-0.182182	0.515789	-0.0873977	0.756776	-0.0510638	0.856581	-0.159873	0.569253	-0.0673938	0.811384	-0.0665051	0.813831	0.108945	0.699134	-0.0320456	0.909735	0.566468	0.0276921	-0.13729	0.625611	-0.221593	0.427361	-0.0917795	0.744946	-0.079857	0.77725	-0.157679	0.574635	0.576431	0.0244953	-0.114768	0.6838	-0.141329	0.615378	-0.0437274	0.87703	-0.132658	0.637424
ENSGALG00000005947	ENSGALG00000005947	MYD88	420420	1:4892458:4905115	black	-0.297937	0.280795	-0.269801	0.330813	-0.0403937	0.886346	-0.205068	0.463455	-0.158216	0.573316	0.0308149	0.913189	-0.113377	0.687454	-0.106427	0.705798	-0.083516	0.767297	-0.0720327	0.798639	-0.0279512	0.921233	0.492218	0.0623426	-0.202382	0.469458	-0.206904	0.459372	-0.051323	0.85586	-0.040982	0.884701	-0.2223	0.42585	0.375126	0.168279	-0.24298	0.38288	-0.0737741	0.793866	-0.034603	0.902562	-0.0511171	0.856433
ENSGALG00000000734	ENSGALG00000000734	RPA2	419566	-1:1570009:1573848	black	-0.297096	0.282221	-0.201346	0.471784	0.117979	0.675393	-0.356979	0.191493	0.0433316	0.878135	0.109581	0.697453	-0.0216755	0.938883	0.0237562	0.933028	-0.18317	0.513477	-0.117661	0.676225	0.0304358	0.914254	0.504425	0.0551736	-0.20691	0.45936	0.118033	0.675253	0.00298073	0.991588	-0.203019	0.468032	-0.114765	0.683807	0.290557	0.293451	-0.198948	0.477188	-0.0916277	0.745355	0.162096	0.563823	0.217948	0.435196
ENSGALG00000027822	ENSGALG00000027822	LOC101747660	101747660	1:9853301:9856295	black	0.296889	0.282572	0.252369	0.364175	0.0103546	0.970784	-0.0115656	0.967369	0.260959	0.347511	0.0347044	0.902278	0.0313247	0.911758	0.319964	0.244995	-0.150556	0.592246	-0.546085	0.0352049	0.0380692	0.892851	-0.59777	0.018597	0.2499	0.369044	0.0456533	0.871654	0.242362	0.38413	-0.27126	0.328102	0.226055	0.41787	-0.569723	0.0266148	0.0605039	0.830394	-0.118486	0.67407	0.24397	0.380883	0.0132749	0.96255
ENSGALG00000038146	ENSGALG00000038146	TRIM58	770718	1:558650:564550	black	-0.296246	0.283666	-0.499251	0.0581342	-0.0258849	0.927041	-0.314575	0.253479	0.0500703	0.859345	0.34201	0.212127	-0.273839	0.323342	-0.352948	0.196916	0.255091	0.358847	0.0400297	0.887364	-0.411767	0.127256	0.130546	0.642839	-0.299952	0.277397	-0.244899	0.379016	-0.226481	0.41697	-0.10804	0.701525	0.265005	0.339811	0.0376509	0.894022	0.242974	0.382892	-0.0137754	0.961138	-0.244332	0.380155	-0.0332109	0.906466
ENSGALG00000000137	ENSGALG00000000137	SNRPE	396180	1:1678657:1680974	black	-0.296243	0.283671	-0.110677	0.694562	-0.0754795	0.789199	-0.276158	0.319095	-0.0183919	0.948129	-0.10457	0.710725	0.0813154	0.773279	0.0545825	0.846802	-0.224368	0.421446	-0.0461871	0.870165	0.253485	0.361985	0.448854	0.093292	-0.255846	0.357378	-0.121284	0.666778	0.18786	0.50256	-0.0654949	0.816614	-0.315844	0.251466	0.441547	0.0994112	-0.2335	0.40228	-0.0258463	0.927149	0.254274	0.360441	-0.13118	0.641212
ENSGALG00000005442	ENSGALG00000005442	PALMD	424475	-1:12531463:12557002	black	-0.295804	0.284419	-0.421089	0.118026	-0.155987	0.578798	-0.434163	0.105875	0.163169	0.561212	0.0839043	0.766243	-0.199038	0.476986	-0.145651	0.6045	0.13894	0.621423	-0.140631	0.617141	-0.489072	0.0642942	0.248535	0.371752	-0.281738	0.309009	-0.230738	0.408028	-0.139037	0.621175	-0.236108	0.396893	0.228504	0.412708	-0.0593902	0.833475	-0.0204156	0.94243	-0.0711539	0.80105	-0.0182797	0.948445	0.124147	0.659346
ENSGALG00000034773	ENSGALG00000034773	TOGARAM1	423595	-1:58968105:59000025	black	-0.294989	0.285812	-0.326533	0.234891	0.0704092	0.803094	-0.18425	0.510953	-0.097731	0.728964	0.0717582	0.799392	-0.220615	0.429457	-0.121577	0.666016	-0.139353	0.620375	0.202247	0.469761	0.258142	0.352928	0.653555	0.00823257	-0.134409	0.632948	0.0699849	0.804259	-0.15174	0.589304	-0.13942	0.620206	-0.109214	0.698423	0.863085	3.42e-05	-0.0622921	0.825451	-0.159676	0.569737	-0.109132	0.69864	-0.0817261	0.772162
ENSGALG00000005378	ENSGALG00000005378	ARNTL	374115	-1:7820343:7864789	black	-0.294364	0.286881	-0.197358	0.480788	0.00772678	0.978197	-0.265758	0.338391	0.158821	0.571832	-0.0780806	0.782094	-0.0135183	0.961863	0.08923	0.751823	-0.161505	0.565265	0.271401	0.32784	0.104818	0.710068	0.364503	0.18163	-0.180407	0.519957	-0.19174	0.493612	0.0119219	0.966364	-0.166925	0.552105	-0.0633577	0.822509	0.418914	0.120138	0.608263	0.0161308	-0.0241687	0.931867	0.206332	0.460643	-0.142927	0.611345
ENSGALG00000009902	ENSGALG00000009902	CFAP57	424559	1:19971912:19993915	black	-0.292453	0.290169	-0.391516	0.148977	0.217244	0.436718	-0.108165	0.701196	-0.226679	0.416552	0.254002	0.360973	-0.321643	0.242387	-0.19545	0.485126	-0.139289	0.620539	0.0788188	0.78008	0.0527309	0.851945	0.299419	0.278294	-0.0656913	0.816073	-0.251752	0.365389	-0.118252	0.67468	-0.120346	0.66922	-0.0968841	0.731232	0.39261	0.147745	0.493525	0.0615438	-0.146825	0.601558	-0.257083	0.354976	-0.158814	0.571847
ENSGALG00000036730	ENSGALG00000036730	MRPS35	419048	1:72622696:72644857	black	-0.289038	0.296098	-0.386793	0.154379	-0.0226156	0.936237	-0.300937	0.275745	-0.0823996	0.770331	0.286157	0.301155	-0.276156	0.319097	-0.237082	0.394891	-0.0283451	0.920126	-0.0582204	0.836714	-0.169007	0.547085	0.213658	0.44451	-0.187013	0.504524	-0.239734	0.389464	-0.0340741	0.904045	-0.169946	0.544827	-0.014506	0.959079	0.314292	0.25393	-0.173536	0.536234	-0.124471	0.658505	-0.152216	0.588123	-0.190834	0.495694
ENSGALG00000022696	ENSGALG00000022696	KCNE3	428105	-1:195858573:195860342	black	-0.288654	0.296769	-0.371931	0.172224	-0.0260614	0.926544	-0.397215	0.14263	0.161512	0.565249	-0.03053	0.913989	-0.128318	0.648569	-0.032084	0.909627	-0.0974886	0.729613	0.206881	0.459424	0.0575658	0.838528	0.688429	0.00454394	-0.292162	0.290671	0.0550903	0.845393	-0.254798	0.359419	-0.252188	0.36453	0.00714371	0.979842	0.73875	0.00165514	-0.0664792	0.813902	-0.0693336	0.806049	0.118848	0.673125	0.0424276	0.88066
ENSGALG00000014791	ENSGALG00000014791	WDR3	427952	-1:79884289:79906621	black	-0.288642	0.29679	-0.224276	0.421641	0.021226	0.940148	-0.0873046	0.757028	-0.17303	0.537443	0.0980511	0.728107	-0.137928	0.62399	-0.116052	0.680435	0.00720726	0.979663	-0.0309413	0.912835	-0.0237073	0.933165	0.372511	0.171503	-0.111051	0.693574	-0.120428	0.669006	-0.144678	0.606941	0.00709063	0.979992	-0.0957139	0.73437	0.349096	0.202192	0.0893122	0.751601	-0.160407	0.567949	-0.150568	0.592218	-0.0760959	0.787514
ENSGALG00000010609	ENSGALG00000010609	NDUFAF7	421477	1:33634880:33642058	black	-0.28798	0.297949	-0.293483	0.288394	0.177533	0.526739	-0.115184	0.682708	-0.231731	0.405957	-0.0628263	0.823976	-0.174617	0.53366	-0.228421	0.412881	0.0107864	0.969566	0.0135086	0.961891	-0.0427984	0.879624	0.287409	0.298951	-0.19917	0.476687	-0.256932	0.355269	-0.0628035	0.824039	0.0430464	0.878932	-0.0940475	0.738844	0.249059	0.370711	0.0210761	0.94057	0.0492066	0.86175	-0.221646	0.427249	-0.126789	0.652512
ENSGALG00000039575	ENSGALG00000039575	AMD1	421755	-1:66336846:66352648	black	-0.286531	0.300495	-0.532207	0.0411296	-0.145337	0.605287	-0.415123	0.123879	0.100876	0.720559	0.128333	0.648529	-0.415056	0.123946	-0.21298	0.445992	0.0748603	0.790893	-0.240497	0.387911	-0.026484	0.925356	0.40525	0.133994	-0.226121	0.417731	0.0186344	0.947446	-0.16218	0.56362	-0.359537	0.188101	0.307221	0.265345	0.514178	0.0498954	-0.334046	0.223659	-0.237619	0.393789	-0.177468	0.526893	-0.0230495	0.935016
ENSGALG00000038040	ENSGALG00000038040	NA	NA	NA:NA:NA	black	-0.285492	0.30233	-0.541196	0.0372138	0.164267	0.558542	-0.430503	0.109184	0.128266	0.648702	0.298768	0.279391	-0.351508	0.198878	-0.288552	0.296947	0.100938	0.720393	-0.232607	0.404133	-0.106297	0.706142	0.46771	0.0787372	-0.243739	0.381349	0.203562	0.466817	-0.079721	0.777621	-0.333353	0.22468	0.388635	0.152257	0.184421	0.510555	-0.129111	0.646528	-0.145776	0.604186	-0.213128	0.445667	0.401342	0.138149
ENSGALG00000038629	ENSGALG00000038629	EFNA2	395831	1:3202721:3234192	black	0.284523	0.304046	0.549847	0.0337151	-0.0384046	0.891912	0.347122	0.204929	0.030698	0.913517	-0.26852	0.333203	0.38616	0.155112	0.342292	0.211726	-0.0545716	0.846832	0.164727	0.557427	0.171718	0.540579	-0.0801513	0.776448	0.290176	0.294114	0.420079	0.119004	0.180059	0.520776	0.211445	0.449354	-0.198608	0.477957	-0.355569	0.193379	-0.270726	0.329092	0.259736	0.349858	0.260086	0.349184	0.402711	0.136684
ENSGALG00000029680	ENSGALG00000029680		NA	1:5489003:5492583	black	0.284518	0.304054	0.376533	0.16656	0.0323783	0.908801	0.302259	0.273537	-0.062691	0.824349	0.129451	0.645653	0.105962	0.70703	0.21679	0.4377	-0.046776	0.868523	-0.171585	0.540898	-0.0568022	0.840644	-0.62165	0.0133593	0.361828	0.185098	0.169189	0.546649	0.0652016	0.817422	0.0515843	0.855133	-0.0245642	0.930755	-0.656765	0.00781791	0.0911907	0.746533	0.0404621	0.886155	0.0352903	0.900635	0.113591	0.686891
ENSGALG00000000724	ENSGALG00000000724	PM20D1	419838	-1:2303301:2320772	black	-0.284341	0.304367	-0.155171	0.580812	0.13135	0.640776	-0.0177695	0.949882	-0.120335	0.669248	-0.329127	0.230975	-0.0784955	0.780962	-0.160355	0.568074	-0.0175325	0.95055	0.182411	0.515253	0.52903	0.0425844	0.42606	0.113298	-0.14261	0.612145	-0.221304	0.42798	0.616063	0.014467	0.10869	0.699808	-0.122712	0.663066	0.336432	0.220163	-0.090631	0.748042	0.420721	0.118382	-0.110022	0.696289	-0.115954	0.680692
ENSGALG00000010743	ENSGALG00000010743	LRRC42	424655	1:25466486:25471907	black	-0.283304	0.306212	-0.390109	0.150572	-0.129807	0.644737	-0.293892	0.287692	-0.120669	0.668379	0.144428	0.607568	-0.292632	0.289859	-0.207786	0.457418	-0.0570477	0.839964	-0.229712	0.410174	0.0572944	0.83928	0.322846	0.240529	-0.19242	0.492051	0.0203474	0.942622	-0.115755	0.681213	-0.20656	0.460137	0.00875207	0.975304	0.498197	0.0587517	-0.38504	0.156416	-0.330298	0.22922	-0.155936	0.578925	-0.111031	0.693628
ENSGALG00000042454	ENSGALG00000042454	DCDC2	420821	1:57871050:57926992	black	-0.281798	0.308902	-0.315648	0.251775	0.091092	0.746799	-0.0102901	0.970966	-0.223682	0.422904	-0.102844	0.715314	-0.399186	0.140478	-0.140979	0.616261	-0.135216	0.630892	0.310807	0.259518	0.418254	0.120783	0.444148	0.0972016	0.0601472	0.831381	-0.0474146	0.866742	0.132394	0.638102	-0.133057	0.636403	-0.0850908	0.763024	0.728934	0.00204931	-0.0587241	0.835319	0.138289	0.623074	-0.297722	0.281159	-0.190392	0.496711
ENSGALG00000005823	ENSGALG00000005823	HDLBP	395984	-1:5116399:5150308	black	-0.280844	0.310612	-0.290299	0.293901	-0.0309728	0.912746	-0.188627	0.500786	-0.00383234	0.989185	-0.126682	0.652789	-0.124969	0.657217	-0.103856	0.712624	-0.046946	0.868049	0.182254	0.515621	0.205965	0.461457	0.735335	0.00178463	-0.188821	0.500335	-0.0319672	0.909955	-0.00237762	0.99329	-0.0722468	0.798052	-0.060242	0.831118	0.718785	0.00253277	-0.0922301	0.743733	-0.0781567	0.781886	-0.0404691	0.886135	0.00487883	0.986232
ENSGALG00000032868	ENSGALG00000032868	AHCYL2	416675	1:1354962:1392842	black	-0.279105	0.313744	-0.219424	0.432014	0.0127087	0.964146	-0.0914015	0.745965	-0.0511792	0.85626	-0.292131	0.290724	-0.131378	0.640706	-0.0916034	0.745421	-0.0242696	0.931583	0.16308	0.561428	0.326861	0.234394	0.596863	0.0188229	-0.130761	0.642286	-0.209259	0.454164	0.30057	0.27636	0.000124115	0.99965	-0.0791216	0.779254	0.540112	0.0376706	-0.107576	0.702755	0.18602	0.50683	-0.0776145	0.783366	-0.0994924	0.724253
ENSGALG00000029072	ENSGALG00000029072	NTN3	396387	-1:14359154:14386623	black	-0.279081	0.313787	-0.222968	0.424425	-0.145771	0.604197	-0.219252	0.432386	-0.108402	0.700569	-0.0592807	0.833778	-0.0777482	0.783001	-0.0352528	0.90074	-0.00860176	0.975729	0.102198	0.717034	-0.435966	0.104271	0.419547	0.119521	-0.144228	0.608073	0.00231549	0.993466	-0.363464	0.182973	-0.070764	0.80212	-0.138218	0.623254	0.14315	0.610784	-0.23242	0.404521	-0.112231	0.690467	-0.0108849	0.969289	0.224417	0.421343
ENSGALG00000035482	ENSGALG00000035482	SEC24B	422523	-1:37267897:37308644	black	-0.277142	0.317303	-0.386835	0.15433	0.0327097	0.907872	-0.159115	0.57111	-0.0292737	0.917517	0.191974	0.493073	-0.311763	0.257977	-0.200105	0.474577	0.0456964	0.871534	0.101057	0.720075	0.152619	0.587123	0.513418	0.0502926	-0.112384	0.690065	-0.00619389	0.982522	-0.158352	0.572981	-0.142327	0.612859	0.125668	0.655408	0.720344	0.00245312	0.10377	0.712852	-0.181902	0.516448	-0.242527	0.383796	-0.12409	0.659493
ENSGALG00000017163	ENSGALG00000017163	ACAT1	418968	-1:181673539:181685617	black	-0.276541	0.318396	-0.362556	0.18415	-0.0784206	0.781166	-0.215956	0.439509	0.0148451	0.958123	-0.0172616	0.951313	-0.215684	0.4401	-0.136876	0.626664	0.0722104	0.798152	-0.00760926	0.978528	0.0426135	0.880141	0.721755	0.00238275	-0.168886	0.547377	0.118553	0.673894	-0.199987	0.474843	-0.137246	0.625722	0.119919	0.670332	0.604014	0.017097	-0.171341	0.541481	-0.217143	0.436936	-0.142259	0.61303	0.179549	0.521979
ENSGALG00000037325	ENSGALG00000037325	SERP1	107054146	1:23804524:23806330	black	-0.276294	0.318846	-0.261936	0.345642	-0.225045	0.420009	-0.143978	0.608701	-0.079779	0.777463	-0.041758	0.882532	-0.150129	0.593308	-0.074836	0.790959	-0.00534119	0.984928	0.0838831	0.766301	-0.0558463	0.843295	0.578288	0.0239317	-0.119243	0.672092	-0.196551	0.482621	-0.105164	0.709149	-0.04822	0.864498	-0.121958	0.665026	0.543279	0.0363475	-0.136734	0.627025	-0.175454	0.53167	-0.0680129	0.80968	-0.0911522	0.746637
ENSGALG00000002123	ENSGALG00000002123	OSCP1	428220	1:4171808:4182985	black	-0.27621	0.319	-0.170116	0.54442	-0.10866	0.699885	-0.160064	0.568787	0.0500277	0.859464	-0.237119	0.394814	-0.0754057	0.789401	0.133965	0.634083	-0.109835	0.696782	0.163504	0.560396	0.101721	0.718307	0.711745	0.00291876	-0.0634176	0.822344	-0.066895	0.812757	-0.0244964	0.930945	-0.133762	0.634603	-0.119719	0.670854	0.533934	0.0403547	-0.00151622	0.995721	0.00685101	0.980668	0.110154	0.69594	0.0964755	0.732327
ENSGALG00000010960	ENSGALG00000010960	GALNT3	424177	1:19687128:19712618	black	-0.274522	0.322086	-0.461449	0.0833768	0.126438	0.653418	-0.215187	0.441179	0.00564049	0.984083	0.200957	0.472658	-0.356437	0.192217	-0.226919	0.416046	0.0494607	0.861042	0.126797	0.65249	0.246603	0.375602	0.358013	0.190117	-0.188619	0.500803	0.0206856	0.941669	-0.200374	0.473971	-0.197495	0.480477	0.186774	0.505079	0.655341	0.0079998	0.18855	0.500964	0.0191452	0.946007	-0.235086	0.399	-0.159745	0.569567
ENSGALG00000013863	ENSGALG00000013863	PSMG2	421040	-1:97037931:97057122	black	-0.274492	0.322142	-0.27693	0.317687	-0.0380965	0.892774	-0.180526	0.519678	-0.00461882	0.986966	-0.148477	0.597429	-0.163635	0.560077	-0.0461552	0.870254	-0.0676654	0.810637	0.197789	0.479812	0.162486	0.562873	0.672187	0.00604891	-0.140883	0.616505	-0.088783	0.753031	-0.0557375	0.843597	-0.111058	0.693555	-0.0695079	0.80557	0.724971	0.00222838	-0.0957915	0.734161	-0.0249452	0.929683	-0.0319411	0.910028	-0.0733118	0.795133
ENSGALG00000041099	ENSGALG00000041099	NA	NA	NA:NA:NA	black	-0.274412	0.322289	-0.250406	0.368043	-0.230918	0.407652	-0.261585	0.346313	-0.00224084	0.993676	0.166976	0.551982	-0.133204	0.636028	-0.0936614	0.739882	0.0558581	0.843262	-0.175097	0.532517	-0.0949721	0.73636	0.25139	0.366102	-0.194807	0.48659	-0.103529	0.713493	-0.080023	0.776798	-0.112948	0.68858	-0.00399072	0.988738	0.290979	0.292719	-0.286091	0.301272	-0.156928	0.576482	-0.0132891	0.962509	-0.130142	0.643877
ENSGALG00000003738	ENSGALG00000003738	EMC3	415936	1:3201509:3205400	black	-0.273809	0.323397	-0.175517	0.531518	-0.073603	0.794335	0.0711666	0.801015	-0.142247	0.613061	-0.0953876	0.735245	-0.300902	0.275804	0.0203779	0.942536	0.037024	0.895778	0.13038	0.643266	0.253926	0.361123	0.552976	0.0325124	0.156638	0.577196	0.0849045	0.763529	0.0452008	0.872917	-0.0810801	0.773919	0.00115668	0.996736	0.498367	0.0586519	-0.155428	0.580177	0.123797	0.660251	-0.240357	0.388197	0.0863842	0.759519
ENSGALG00000026167	ENSGALG00000026167	PIK3R5	417319	-1:1984539:2033615	black	-0.273616	0.323752	-0.443992	0.0973337	0.30476	0.269389	-0.230098	0.409365	-0.224882	0.420354	0.0878111	0.755658	-0.386035	0.155258	-0.198442	0.478333	-0.251785	0.365322	-0.0689334	0.807149	-0.000635115	0.998208	0.161026	0.566436	-0.0971635	0.730483	-0.24745	0.373912	-0.103049	0.714768	-0.253379	0.362193	-0.0413036	0.883802	0.290224	0.29403	0.383955	0.157687	-0.217096	0.437037	-0.239104	0.390751	-0.152058	0.588514
ENSGALG00000008286	ENSGALG00000008286	SUMF1	100859261	-1:18771301:18798301	black	-0.27233	0.326122	-0.270723	0.329097	0.0358293	0.899125	-0.117391	0.67693	-0.0956001	0.734675	-0.1639	0.559433	-0.174235	0.534568	-0.0938206	0.739454	-0.0811073	0.773845	0.204763	0.464135	0.209161	0.454378	0.653394	0.00825372	-0.123255	0.661657	-0.130125	0.643921	-0.000842057	0.997624	-0.0516393	0.85498	-0.118853	0.673112	0.702041	0.00352632	-0.0678658	0.810085	0.000327577	0.999076	-0.101335	0.719335	-0.0961534	0.733191
ENSGALG00000038791	ENSGALG00000038791	NA	NA	NA:NA:NA	black	-0.27202	0.326695	-0.119404	0.671674	-0.0142381	0.959834	-0.271475	0.327703	0.0669237	0.812678	-0.0376379	0.894058	0.0505284	0.85807	0.0964253	0.732462	-0.121122	0.667198	-0.0953719	0.735287	0.0798527	0.777262	0.509313	0.0524795	-0.189743	0.498209	0.0650878	0.817736	0.00814715	0.977011	-0.122615	0.663318	-0.127609	0.650397	0.290362	0.293791	-0.139852	0.619111	-0.0565996	0.841206	0.208676	0.45545	0.160089	0.568726
ENSGALG00000010942	ENSGALG00000010942	NUP42	420614	1:30977907:30984334	black	-0.271418	0.327808	-0.344772	0.208218	-0.0140813	0.960276	-0.273594	0.323792	0.0130024	0.963318	-0.0297008	0.916317	-0.0741475	0.792844	-0.200423	0.473862	0.00227854	0.99357	0.255068	0.358893	-0.0573123	0.83923	0.672333	0.00603385	-0.317645	0.248625	-0.0624019	0.825148	-0.238063	0.392878	-0.0375626	0.894269	-0.0478934	0.865408	0.692665	0.00420509	-0.035659	0.899602	-0.178169	0.525235	-0.0359861	0.898685	-0.0220676	0.937779
ENSGALG00000021685	ENSGALG00000021685	SERINC2	419558	1:722207:728463	black	-0.271319	0.327993	-0.271237	0.328144	0.0802758	0.776109	-0.145472	0.604948	-0.137189	0.625868	-0.194139	0.488117	-0.197561	0.480327	-0.0865307	0.759122	-0.14407	0.608469	0.130338	0.643373	0.0868909	0.758147	0.558215	0.0305712	-0.104972	0.709658	-0.227101	0.415661	-0.00682804	0.980732	-0.0852977	0.762463	-0.143752	0.609268	0.606219	0.0165901	-0.0451974	0.872926	-0.0735924	0.794364	-0.10604	0.706825	-0.141975	0.613747
ENSGALG00000006272	ENSGALG00000006272	ECE2	100857430	-1:16037792:16044575	black	0.271153	0.3283	0.163157	0.561242	-0.136426	0.627808	0.00839625	0.976308	0.250387	0.36808	0.108389	0.700603	0.12704	0.651865	0.105456	0.708373	0.157288	0.575597	-0.120002	0.670114	-0.445676	0.0959201	-0.500565	0.0573716	0.0591372	0.834175	0.101896	0.717841	-0.349938	0.201031	-0.0407322	0.8854	0.292317	0.290403	-0.442416	0.0986692	0.225738	0.418541	-0.23138	0.406689	0.11355	0.686998	0.0419299	0.882051
ENSGALG00000026385	ENSGALG00000026385	LYPLAL1	421351	-1:19224622:19249885	black	-0.271113	0.328375	-0.110282	0.695602	0.0524877	0.852621	-0.0991982	0.725039	-0.16226	0.563424	-0.244568	0.379681	0.079404	0.778485	-0.0161877	0.954339	-0.16763	0.550404	0.285011	0.30318	0.169207	0.546606	0.670713	0.00620291	-0.193921	0.488613	-0.00224408	0.993667	-0.0448723	0.873833	0.0850404	0.763161	-0.365792	0.179975	0.544069	0.0360231	-0.117421	0.676851	0.0320517	0.909718	0.0827321	0.769427	0.072018	0.798679
ENSGALG00000043044	ENSGALG00000043044	IL1R1	396481	1:135111322:135129457	black	0.27053	0.329457	0.275621	0.320075	-0.130516	0.642915	0.543383	0.0363048	-0.262266	0.345012	-0.304111	0.270462	0.0915844	0.745472	0.0718088	0.799253	0.0777918	0.782882	0.169344	0.546275	-0.141696	0.614451	0.214883	0.44184	0.319311	0.246013	-0.218495	0.434016	-0.329116	0.230991	0.368668	0.176315	-0.180939	0.518708	0.273811	0.323393	0.196962	0.481687	-0.382616	0.159263	-0.222238	0.425984	-0.160547	0.567605
ENSGALG00000000855	ENSGALG00000000855	ZMPSTE24	419572	-1:1832025:1846206	black	-0.270023	0.330399	-0.255442	0.358163	-0.0385218	0.891584	-0.144104	0.608385	-0.0390574	0.890085	-0.173955	0.535235	-0.157417	0.575278	-0.0325517	0.908315	-0.0705495	0.802709	0.186448	0.505836	0.087566	0.756321	0.708204	0.00312986	-0.0975557	0.729433	-0.105453	0.708382	-0.057671	0.838236	-0.0899101	0.749987	-0.0916197	0.745377	0.654679	0.0080854	-0.0769599	0.785153	-0.0616191	0.827311	-0.0521109	0.853669	-0.000306419	0.999135
ENSGALG00000026221	ENSGALG00000026221	ENDOG	417204	1:5648970:5651113	black	-0.267734	0.334674	-0.256293	0.356508	0.0176186	0.950307	-0.149582	0.594672	-0.0737444	0.793948	-0.132958	0.636658	-0.0803254	0.775974	-0.114277	0.685089	-0.0643963	0.819643	0.254303	0.360384	0.114098	0.685559	0.696847	0.00389057	-0.19849	0.478224	-0.105109	0.709295	-0.0854571	0.762031	-0.000496526	0.998599	-0.15652	0.577485	0.695136	0.00401692	-0.0529203	0.851419	-0.0586534	0.835515	-0.0446816	0.874366	-0.0484324	0.863906
ENSGALG00000034078	ENSGALG00000034078	GLT8D2	418085	1:54676399:54693423	black	-0.267504	0.335106	-0.141236	0.615611	-0.089551	0.750956	-0.0631165	0.823174	-0.0162133	0.954267	-0.065841	0.81566	-0.0921631	0.743913	0.0459954	0.8707	-0.0593578	0.833565	0.277278	0.317055	0.254097	0.360788	0.523756	0.0450827	-0.0504751	0.858219	-0.162117	0.563774	0.0942021	0.738429	-0.0325777	0.908242	-0.171207	0.541803	0.596308	0.0189622	0.0206271	0.941834	0.171852	0.540258	0.0288232	0.918783	-0.170827	0.542715
ENSGALG00000045671	ENSGALG00000045671	LOC416755	416755	-1:14193311:14205059	black	0.26688	0.336277	0.0959749	0.733669	-0.115521	0.681827	0.182207	0.515732	-0.0634486	0.822258	-0.36246	0.184275	-0.114046	0.685696	0.117871	0.675676	-0.0168294	0.952531	0.0109264	0.969172	-0.400411	0.139151	0.0329508	0.907195	0.226322	0.417305	-0.461879	0.0830516	-0.292684	0.289769	0.014825	0.958179	-0.0503267	0.858632	0.216833	0.437607	-0.366612	0.178926	-0.108011	0.701603	-0.0975009	0.72958	-0.336503	0.22006
ENSGALG00000007070	ENSGALG00000007070		NA	1:9166630:9185734	black	-0.26663	0.336747	-0.182241	0.515651	-0.0640558	0.820582	-0.0956448	0.734555	-0.019233	0.94576	0.0880203	0.755092	-0.118636	0.673677	0.0766455	0.786012	-0.120545	0.668701	0.234378	0.400463	-0.0703241	0.803328	0.33317	0.224952	-0.00859756	0.97574	-0.290422	0.293686	-0.15666	0.577142	-0.106469	0.705687	-0.135793	0.62942	0.397583	0.142227	0.611702	0.0153799	-0.147935	0.598782	0.0276303	0.922134	-0.198549	0.47809
ENSGALG00000043036	ENSGALG00000043036	VASH1	423369	1:39074525:39084657	black	-0.265763	0.338381	-0.185649	0.507693	0.530383	0.0419603	-0.0392058	0.889669	-0.380435	0.161855	0.0590915	0.834302	-0.0862174	0.759971	-0.348388	0.20317	-0.115193	0.682686	0.341148	0.213357	-0.0184987	0.947828	-0.236295	0.396507	-0.117924	0.675537	0.140289	0.618006	0.234589	0.400024	0.103035	0.714806	-0.16544	0.555698	-0.48728	0.0654257	0.335957	0.220857	0.376965	0.166035	-0.272167	0.326424	0.305159	0.26873
ENSGALG00000008572	ENSGALG00000008572	LAMP2	414800	1:16422849:16439800	black	-0.265642	0.338609	-0.575679	0.0247262	0.0176156	0.950316	-0.407086	0.132072	0.0478346	0.865572	0.404798	0.13447	-0.327647	0.233204	-0.508527	0.0529065	0.240991	0.386909	-0.318218	0.247724	-0.0842462	0.765315	0.188736	0.500533	-0.400317	0.139253	-0.0235437	0.933625	-0.0394103	0.889097	-0.163938	0.559342	0.383851	0.157809	0.22674	0.416423	-0.194535	0.487211	-0.247648	0.373517	-0.315958	0.251285	-0.0215509	0.939234
ENSGALG00000002430	ENSGALG00000002430	SMN	374025	-1:73237469:73242977	black	-0.261238	0.346976	-0.11961	0.671136	-0.250489	0.367879	-0.401251	0.138246	0.185161	0.508828	-0.0799298	0.777052	0.120409	0.669054	0.158565	0.572459	-0.219284	0.432317	0.118577	0.67383	-0.0238038	0.932894	0.478397	0.0712488	-0.265659	0.338576	-0.0634958	0.822128	-0.0337321	0.905004	-0.190344	0.496821	-0.238929	0.391108	0.458931	0.0852959	-0.172931	0.537679	-0.112472	0.689831	0.413425	0.12558	-0.0452876	0.872674
ENSGALG00000006083	ENSGALG00000006083	LMINA	415464	-1:11903990:11918958	black	-0.260759	0.347894	-0.157883	0.574134	0.0471522	0.867474	-0.111111	0.693416	-0.167835	0.549909	0.0695248	0.805523	-0.0850157	0.763228	-0.191607	0.493916	-0.0792087	0.779017	0.30664	0.266296	0.0633909	0.822417	0.100439	0.721726	-0.15495	0.581356	-0.238468	0.392049	0.078351	0.781356	0.053585	0.849572	-0.210603	0.451201	0.46291	0.0822766	0.00413919	0.988319	0.0355634	0.89987	-0.0927626	0.742299	-0.42954	0.110068
ENSGALG00000039300	ENSGALG00000039300	NFAT5	415866	1:18970250:19029815	black	-0.260546	0.348301	-0.27645	0.318562	0.00201951	0.994301	-0.138784	0.621817	-0.0903497	0.748801	-0.0575336	0.838617	-0.179739	0.52153	-0.0975197	0.72953	-0.0957993	0.73414	0.228582	0.412545	0.214549	0.442567	0.652788	0.00833411	-0.126133	0.654206	0.0143316	0.95957	-0.152993	0.586196	-0.0839999	0.765984	-0.11449	0.684529	0.83913	9.19e-05	-0.117909	0.675577	-0.126016	0.654507	-0.096063	0.733433	-0.106513	0.705569
ENSGALG00000000044	ENSGALG00000000044	WFIKKN1	NA	1:13962836:13964455	black	0.260503	0.348384	0.307611	0.264707	-0.201376	0.471716	0.317746	0.248466	0.0451338	0.873104	-0.298174	0.280394	0.30298	0.272337	0.0222415	0.93729	0.286655	0.300276	0.0891552	0.752025	-0.145416	0.605088	-0.410159	0.128897	0.034105	0.903958	-0.0851525	0.762857	0.00122324	0.996548	0.364163	0.182068	0.0853866	0.762222	-0.529273	0.0424715	0.294701	0.286305	0.0914931	0.745718	0.0244077	0.931195	-0.0149136	0.95793
ENSGALG00000002157	ENSGALG00000002157	RPS17	374053	-1:1790978:1793271	black	-0.260298	0.348777	-0.409097	0.129988	0.243094	0.38265	-0.47455	0.0738826	0.179939	0.521059	-0.0796768	0.777741	-0.229098	0.411461	-0.0950828	0.736063	-0.190954	0.495418	0.0576748	0.838226	0.283844	0.305251	0.245145	0.378521	-0.346164	0.206265	-0.175981	0.530416	0.0310226	0.912606	-0.344095	0.209172	0.102063	0.717395	0.643045	0.00971177	0.0404512	0.886186	0.135132	0.631105	0.0956187	0.734625	-0.35223	0.197893
ENSGALG00000007304	ENSGALG00000007304	DNMBP	423827	1:23021332:23035696	black	-0.259752	0.349826	-0.241682	0.385507	0.0406996	0.885491	-0.120503	0.66881	-0.0845684	0.764441	-0.190979	0.495361	-0.14745	0.599992	-0.0625545	0.824726	-0.0809299	0.774328	0.381246	0.160888	0.0137676	0.96116	0.62757	0.0122586	-0.104201	0.711705	-0.156394	0.577794	-0.099662	0.7238	-0.0431239	0.878715	-0.161152	0.566128	0.635754	0.0108543	-0.0828518	0.769102	0.108388	0.700606	-0.0696277	0.805241	-0.0598719	0.832142
ENSGALG00000035748	ENSGALG00000035748	NA	NA	NA:NA:NA	black	0.259401	0.350501	0.32451	0.237974	-0.0367189	0.896632	0.169041	0.547004	0.0755867	0.788906	0.160282	0.568255	0.230212	0.409127	0.113674	0.686671	0.0578442	0.837756	-0.346646	0.205593	-0.0960656	0.733426	-0.560343	0.0298081	0.154781	0.581773	0.0713221	0.800588	0.217782	0.435554	0.104427	0.711104	0.0780676	0.782129	-0.763042	0.000935824	0.157115	0.576022	-0.0941685	0.738519	0.117971	0.675415	0.144478	0.607443
ENSGALG00000012998	ENSGALG00000012998	WNT5B	418154	1:60852680:60917603	black	-0.258115	0.352981	-0.0790122	0.779553	0.0588036	0.835099	-0.150901	0.591389	-0.00613007	0.982702	-0.203647	0.466626	-0.12764	0.650316	0.151129	0.590823	-0.181191	0.518115	-0.140426	0.617661	0.366541	0.179017	0.272434	0.32593	-0.00814029	0.97703	-0.128141	0.649025	0.359311	0.188399	-0.179387	0.522361	-0.107746	0.702305	0.271806	0.32709	-0.206256	0.460812	0.242399	0.384055	0.101396	0.719172	-0.12318	0.661853
ENSGALG00000004655	ENSGALG00000004655	SMURF1	416487	-1:4669726:4684664	black	-0.255843	0.357383	-0.285409	0.302476	-0.0267302	0.924664	-0.182411	0.515254	-0.0220957	0.9377	-0.132293	0.638359	-0.197359	0.480785	-0.0282982	0.920258	-0.0978901	0.728538	0.126909	0.652202	0.0940599	0.738811	0.656805	0.00781291	-0.105108	0.709298	-0.130082	0.644031	-0.0944232	0.737835	-0.146554	0.602236	-0.0703457	0.803268	0.690451	0.00437964	-0.092547	0.74288	-0.0906772	0.747917	-0.0454969	0.87209	-0.0702632	0.803495
ENSGALG00000016648	ENSGALG00000016648	ARSD	418658	1:129773839:129788312	black	-0.253975	0.361026	-0.319694	0.245415	0.201387	0.471693	-0.168245	0.54892	-0.156785	0.576834	0.183606	0.512457	-0.155826	0.579194	-0.237463	0.394108	-0.168504	0.548297	0.237976	0.393058	0.49298	0.0618761	0.435571	0.104621	-0.226068	0.417844	0.254904	0.359211	-0.0756252	0.788801	-0.0735148	0.794577	-0.147034	0.601035	0.75202	0.0012216	-0.00880488	0.975156	-0.0618331	0.826719	-0.116937	0.678117	-0.0596949	0.832632
ENSGALG00000046387	ENSGALG00000046387	NA	NA	NA:NA:NA	black	-0.253735	0.361496	-0.425126	0.114177	-0.0411862	0.88413	-0.273306	0.324322	-0.0757953	0.788336	0.0529339	0.851381	-0.325368	0.236663	-0.213003	0.445941	0.00323658	0.990866	-0.194453	0.487398	-0.00158578	0.995525	0.204476	0.464774	-0.207994	0.456957	-0.33109	0.228037	0.0812274	0.773519	-0.180725	0.51921	0.0339617	0.90436	0.215205	0.441139	-0.266449	0.337089	0.0866801	0.758718	-0.161486	0.565313	-0.181812	0.516657
ENSGALG00000013751	ENSGALG00000013751	NA	NA	NA:NA:NA	black	-0.253712	0.361541	-0.169638	0.545568	-0.0472529	0.867193	-0.055856	0.843268	-0.0258382	0.927172	0.0655386	0.816493	-0.056554	0.841332	-0.0017233	0.995137	-0.0593549	0.833573	0.285787	0.301808	-0.00525533	0.98517	0.408448	0.130658	-0.0565586	0.84132	-0.193486	0.48961	-0.147633	0.599535	-0.0130034	0.963315	-0.106026	0.70686	0.455461	0.0879926	0.644498	0.00949577	-0.215427	0.440657	-0.0125799	0.964509	-0.138898	0.621528
ENSGALG00000029597	ENSGALG00000029597	NA	NA	NA:NA:NA	black	-0.252773	0.36338	-0.305097	0.268834	-0.177424	0.526996	-0.257324	0.354509	-0.0619238	0.826469	0.0208335	0.941253	-0.23489	0.399404	-0.0479623	0.865216	-0.104674	0.710449	-0.142617	0.612129	-0.0860543	0.760413	0.354129	0.195318	-0.112963	0.68854	-0.273967	0.323107	0.00595129	0.983206	-0.20188	0.470585	-0.104718	0.710332	0.326481	0.23497	-0.299185	0.278688	-0.10642	0.705815	-0.0221714	0.937487	-0.126257	0.653886
ENSGALG00000006412	ENSGALG00000006412	VGLL1	770844	1:4348840:4354659	black	0.251866	0.365164	0.16376	0.559774	-0.392902	0.147417	0.386348	0.154894	0.0780166	0.782268	-0.466076	0.0799299	0.0345669	0.902663	0.1361	0.628638	0.323409	0.239663	-0.0128854	0.963648	-0.168469	0.548381	0.496969	0.0594765	0.222487	0.42545	-0.38362	0.158081	-0.159738	0.569584	0.251331	0.366217	0.123599	0.660765	0.311221	0.258851	-0.139651	0.61962	-0.150753	0.591756	-0.128228	0.648802	-0.0955021	0.734938
ENSGALG00000009301	ENSGALG00000009301	CHRNA1	395608	1:16798486:16810189	black	0.251034	0.366804	0.355618	0.193314	-0.474714	0.0737691	0.244859	0.379097	0.186903	0.504779	-0.177512	0.526788	0.341927	0.212245	0.336636	0.219867	0.165452	0.555669	0.105403	0.708513	-0.424246	0.115009	0.383106	0.158686	0.146427	0.602554	-0.258891	0.351482	-0.372843	0.171092	0.240138	0.388643	-0.145505	0.604864	0.18609	0.506668	-0.0895744	0.750893	-0.241568	0.385736	0.266669	0.336673	-0.043806	0.87681
ENSGALG00000038789	ENSGALG00000038789	CLIC3	417293	-1:778807:781437	black	0.250949	0.366971	0.25369	0.361585	-0.0682064	0.809148	0.275091	0.321044	0.189422	0.498947	-0.253757	0.361453	0.0958027	0.734131	0.262256	0.345032	0.11078	0.694288	0.323337	0.239774	0.0538613	0.848805	-0.0921496	0.74395	0.259833	0.34967	0.174786	0.533258	-0.0876788	0.756015	0.0454789	0.872141	0.139565	0.619838	-0.157152	0.57593	0.224748	0.42064	0.333446	0.224543	0.0858812	0.760882	0.18435	0.51072
ENSGALG00000008486	ENSGALG00000008486	CACNA2D1	768444	1:10375977:10734880	black	0.250616	0.367629	0.292238	0.290539	0.171246	0.54171	0.488512	0.0646462	-0.369453	0.175326	0.173745	0.535738	0.00957576	0.972981	-0.037369	0.894811	-0.0148561	0.958092	0.0248697	0.929895	0.213262	0.445374	-0.473512	0.0746047	0.333784	0.224045	0.179556	0.521962	-0.00734202	0.979282	0.262749	0.344092	-0.17659	0.528972	-0.221254	0.428088	-0.019477	0.945073	0.0526006	0.852307	-0.268412	0.333405	-0.0957192	0.734355
ENSGALG00000002062	ENSGALG00000002062	SRP68	417363	1:4538742:4552221	black	-0.249934	0.368977	-0.243608	0.381613	-0.0453786	0.87242	-0.118407	0.674276	-0.0448332	0.873942	-0.166377	0.55343	-0.14766	0.599467	-0.0465718	0.869092	-0.0448655	0.873852	0.152637	0.587079	0.122271	0.66421	0.688583	0.00453128	-0.103991	0.712265	-0.12818	0.648924	-0.040015	0.887406	-0.0590447	0.834432	-0.0873208	0.756984	0.654487	0.00811045	-0.09552	0.73489	-0.0534605	0.849918	-0.0646696	0.818889	-0.0376328	0.894073
ENSGALG00000012877	ENSGALG00000012877	CREB3L2	418123	1:57351612:57424085	black	-0.249544	0.36975	-0.364246	0.181961	0.0618373	0.826708	-0.187769	0.50277	-0.0611646	0.828567	0.0302399	0.914804	-0.232798	0.403737	-0.167667	0.550314	-0.0557979	0.843429	0.147954	0.598735	0.142122	0.613375	0.727204	0.00212604	-0.152412	0.587637	0.0490053	0.862311	-0.171512	0.541073	-0.126898	0.652232	-0.0194495	0.94515	0.773207	0.00072276	-0.149194	0.595639	-0.157364	0.575409	-0.154992	0.581253	0.0446529	0.874446
ENSGALG00000032685	ENSGALG00000032685	HECTD4	426582	-1:6603817:6667047	black	-0.247903	0.373008	-0.321526	0.242568	0.267021	0.336012	-0.257337	0.354484	-0.00592748	0.983273	0.302954	0.27238	-0.0926439	0.742619	-0.123701	0.660501	-0.189993	0.497631	0.11371	0.686578	0.174169	0.534727	0.402646	0.136753	-0.228564	0.412581	0.00739621	0.979129	-0.120263	0.669435	-0.149804	0.594118	-0.0883591	0.754176	0.432124	0.10771	0.486312	0.0660433	-0.150196	0.593142	0.0205879	0.941945	0.0277677	0.921748
ENSGALG00000039155	ENSGALG00000039155	ZHX3	419176	-1:4936185:4966601	black	-0.247855	0.373104	-0.23179	0.405833	-0.194226	0.487918	-0.142417	0.612632	0.116837	0.67838	-0.212455	0.44714	-0.102901	0.715163	-0.0509125	0.857002	0.127543	0.650566	0.179242	0.522701	0.102064	0.717393	0.543477	0.0362662	-0.173985	0.535164	-0.256624	0.355867	0.0744447	0.79203	-0.0227313	0.935911	0.0640075	0.820716	0.533709	0.040455	-0.0073469	0.979269	0.109837	0.696778	-0.0135307	0.961828	-0.164062	0.559041
ENSGALG00000035406	ENSGALG00000035406	DSN1	426088	-1:1110787:1116428	black	-0.247794	0.373226	-0.236936	0.395189	-0.0648654	0.818349	-0.0873068	0.757022	-0.0620916	0.826005	-0.193822	0.48884	-0.148096	0.598379	-0.046215	0.870087	-0.0257223	0.927498	0.208391	0.456079	0.0616247	0.827295	0.713062	0.00284321	-0.0792904	0.778794	-0.139682	0.619542	-0.0644931	0.819376	-0.0354593	0.900161	-0.0965714	0.73207	0.628204	0.012145	-0.0787657	0.780225	-0.0399444	0.887603	-0.086566	0.759027	-0.000147748	0.999583
ENSGALG00000007115	ENSGALG00000007115	ASB7	415518	1:17780255:17808686	black	-0.24665	0.375509	-0.260656	0.348091	-0.00390694	0.988975	-0.106309	0.706109	-0.0862602	0.759855	-0.145966	0.60371	-0.173612	0.536053	-0.0725293	0.797277	-0.0670071	0.812448	0.191691	0.493723	0.113911	0.68605	0.676397	0.00562574	-0.0953008	0.735478	-0.127553	0.65054	-0.0856135	0.761607	-0.0576191	0.83838	-0.108403	0.700567	0.693502	0.00414063	-0.0765757	0.786203	-0.0685952	0.808079	-0.102099	0.717298	-0.0625348	0.824781
ENSGALG00000002561	ENSGALG00000002561	FANCE	419891	-1:4080001:4083104	black	-0.244337	0.380145	-0.0679376	0.809887	0.158349	0.57299	-0.0748515	0.790917	-0.00241374	0.993188	-0.417811	0.121218	-0.0348907	0.901755	0.0255708	0.927924	-0.138441	0.622687	0.198059	0.479199	0.545162	0.0355778	0.402036	0.137405	-0.0878429	0.755572	-0.168836	0.547498	0.591082	0.0203133	-0.0123802	0.965072	-0.133558	0.635123	0.365703	0.180089	-0.0851779	0.762788	0.455063	0.0883054	0.0658246	0.815705	-0.113553	0.686991
ENSGALG00000011386	ENSGALG00000011386	BCS1L	424212	-1:22467737:22473283	black	-0.244067	0.380688	-0.34848	0.203042	-0.0570457	0.839969	-0.133159	0.636144	-0.144888	0.606413	-0.0560765	0.842657	-0.302755	0.272711	-0.111958	0.691186	-0.040566	0.885864	-0.0368657	0.896221	-0.15082	0.591589	0.524034	0.0449484	-0.0508538	0.857165	-0.358942	0.188888	-0.0874114	0.756739	-0.120647	0.668435	-0.0671817	0.811968	0.406419	0.132768	-0.104546	0.710788	-0.118523	0.673972	-0.197042	0.481505	-0.078596	0.780688
ENSGALG00000044991	ENSGALG00000044991	NA	NA	NA:NA:NA	black	-0.243777	0.381273	-0.173555	0.536189	-0.00173114	0.995115	-0.136102	0.628632	0.0403108	0.886578	-0.27347	0.32402	-0.126399	0.653518	0.0635051	0.822102	-0.115208	0.682645	0.210843	0.450675	0.202998	0.468079	0.543861	0.0361083	-0.064832	0.818441	-0.265057	0.339714	0.172404	0.538939	-0.111505	0.692377	-0.0999429	0.72305	0.558727	0.0303863	0.00265886	0.992497	0.171104	0.542051	0.0504856	0.85819	-0.160803	0.566979
ENSGALG00000001374	ENSGALG00000001374	SLC35E2B	NA	1:2008845:2016560	black	-0.243483	0.381865	-0.287158	0.299392	0.0178848	0.949557	-0.126951	0.652094	-0.0620703	0.826064	-0.112396	0.690033	-0.155168	0.580819	-0.122484	0.663658	-0.0521926	0.853442	0.208728	0.455334	0.158833	0.571802	0.693998	0.00410276	-0.145656	0.604488	-0.103126	0.714564	-0.0592745	0.833795	-0.0438999	0.876548	-0.0832252	0.768087	0.713594	0.00281313	-0.0310607	0.912499	-0.0826535	0.76964	-0.103197	0.714375	-0.0479029	0.865382
ENSGALG00000036675	ENSGALG00000036675	NA	NA	NA:NA:NA	black	0.242556	0.383738	0.334235	0.223381	-0.00231021	0.99348	0.253501	0.361955	0.188978	0.499974	-0.584953	0.0219902	0.172897	0.537761	0.182483	0.515084	0.123953	0.659848	0.175466	0.531641	0.393126	0.147165	-0.0655022	0.816594	0.170938	0.542447	0.224966	0.420177	0.437639	0.102797	0.130257	0.643582	0.160701	0.567228	-0.170236	0.544131	-0.312518	0.256764	0.530343	0.0419784	0.0989712	0.725646	0.178197	0.525169
ENSGALG00000035185	ENSGALG00000035185	2021-09-04	770762	1:979982:986427	black	0.242214	0.384429	0.1122	0.690549	0.000805507	0.997727	-0.0474267	0.866709	0.0700045	0.804205	0.417193	0.121826	0.0092125	0.974006	0.116741	0.678629	-0.110263	0.695654	-0.327216	0.233856	-0.175598	0.531327	-0.603818	0.0171426	0.0832268	0.768083	0.00542834	0.984682	-0.204404	0.464934	-0.158599	0.572376	0.00364047	0.989727	-0.334285	0.223307	-0.108324	0.700775	-0.108183	0.701147	0.142357	0.612783	-0.174864	0.533072
ENSGALG00000013225	ENSGALG00000013225	VAT1L	430410	1:13982142:14025331	black	-0.241982	0.384899	-0.254389	0.360217	0.10682	0.704755	-0.157387	0.575351	-0.0729969	0.795996	-0.0264123	0.925558	-0.170333	0.543899	-0.113988	0.685848	-0.10643	0.70579	0.150296	0.592893	0.115134	0.682839	0.549794	0.0337355	-0.110699	0.694504	-0.166132	0.554024	0.0711916	0.800946	-0.0813905	0.773075	-0.110652	0.694626	0.578998	0.023719	-0.119949	0.670253	0.00131014	0.996303	-0.0884083	0.754043	-0.0948271	0.73675
ENSGALG00000006130	ENSGALG00000006130	STMN3	419263	1:9700709:9711179	black	-0.241763	0.385342	-0.241061	0.386766	0.0822095	0.770847	-0.00493023	0.986087	-0.2862	0.301079	0.208406	0.456047	0.00166675	0.995296	-0.31252	0.256762	0.074334	0.792333	0.0868727	0.758197	-0.0477768	0.865733	0.5994	0.0181959	-0.231988	0.405421	-0.0768519	0.785448	-0.172334	0.539107	0.238075	0.392853	-0.231238	0.406984	0.352002	0.198204	0.0459125	0.870931	-0.207575	0.457884	-0.223883	0.422478	0.119521	0.671369
ENSGALG00000039081	ENSGALG00000039081	NA	NA	NA:NA:NA	black	0.241099	0.386688	0.220144	0.430468	-0.113587	0.686902	0.376804	0.16623	-0.209894	0.452763	-0.497103	0.0593971	-0.177258	0.527389	0.311396	0.258568	-0.149645	0.594515	-0.17013	0.544386	-0.117575	0.67645	0.17929	0.522589	0.50273	0.0561314	-0.267045	0.335968	-0.178388	0.524716	-0.0234532	0.93388	-0.123327	0.661469	0.240271	0.388371	-0.287884	0.298118	-0.262393	0.344772	-0.149649	0.594505	-0.152718	0.586879
ENSGALG00000034584	ENSGALG00000034584	NEDD4L	374119	1:612902:742092	black	-0.240155	0.388608	-0.365034	0.180947	0.0510424	0.85664	-0.368484	0.176549	-0.124288	0.658978	-0.0260265	0.926642	-0.062409	0.825128	-0.288177	0.297603	-0.121176	0.667058	-0.0332693	0.906302	-0.156092	0.57854	0.167668	0.550312	-0.430641	0.109058	-0.311165	0.25894	-0.0788145	0.780092	-0.0440467	0.876138	-0.176334	0.529579	0.219438	0.431985	-0.125972	0.654622	-0.129648	0.645147	0.000661809	0.998132	-0.202942	0.468204
ENSGALG00000009035	ENSGALG00000009035	GTPBP10	420544	1:21718731:21731532	black	-0.239381	0.390185	-0.270707	0.329127	-0.0783183	0.781445	-0.0885664	0.753616	-0.0558813	0.843198	-0.138342	0.62294	-0.153749	0.584326	-0.116737	0.67864	0.0355985	0.899772	0.154948	0.581361	0.111343	0.692805	0.696589	0.00390943	-0.129965	0.644333	-0.125531	0.655763	-0.0725076	0.797337	-0.00653046	0.981572	-0.0406686	0.885578	0.6643	0.00690902	-0.0819362	0.77159	-0.0862397	0.759911	-0.130159	0.643833	-0.0402778	0.886671
ENSGALG00000013356	ENSGALG00000013356	IKBKE	430480	1:2475894:2486807	black	-0.239295	0.390361	-0.280075	0.311996	0.008452	0.976151	-0.207799	0.45739	0.0242753	0.931567	-0.183416	0.512901	-0.305432	0.268282	0.101935	0.717735	-0.201084	0.472374	0.0298803	0.915813	0.143894	0.608912	0.570446	0.0263799	0.0156022	0.955989	-0.1662	0.553858	-0.0247345	0.930276	-0.311656	0.25815	-0.0233991	0.934032	0.652291	0.00840037	-0.085359	0.762297	-0.0341178	0.903922	-0.00961672	0.972866	-0.105034	0.709493
ENSGALG00000027036	ENSGALG00000027036	PKIB	769402	-1:61297796:61352281	black	-0.238133	0.392736	-0.102971	0.714978	0.285579	0.302175	-0.145604	0.604616	-0.0857364	0.761274	0.508459	0.0529434	-0.0211934	0.94024	-0.190957	0.495411	-0.165827	0.554761	0.100547	0.721436	0.463986	0.0814736	-0.118006	0.675324	-0.0768904	0.785343	0.641257	0.00998285	0.285946	0.301527	-0.100407	0.721811	-0.00808684	0.977181	-0.0279359	0.921276	0.292043	0.290876	-0.0807975	0.774689	-0.0453127	0.872604	0.293674	0.288067
ENSGALG00000004653	ENSGALG00000004653		NA	1:12639927:12644952	black	0.23755	0.39393	0.26844	0.333352	-0.247751	0.373312	0.258991	0.351291	-0.0729035	0.796251	-0.0270608	0.923735	0.151273	0.590464	0.0785853	0.780717	0.206365	0.460569	-0.154156	0.583317	-0.517948	0.047958	-0.279968	0.312188	0.213705	0.444408	0.119737	0.670804	-0.214826	0.441963	0.190721	0.495955	0.0334923	0.905676	-0.661603	0.00722431	-0.208528	0.455776	-0.138778	0.621834	-0.0540861	0.84818	0.340586	0.214161
ENSGALG00000039733	ENSGALG00000039733	LOC426514	426514	1:1181751:1184394	black	0.236423	0.396244	0.143968	0.608726	-0.0600804	0.831565	0.0860329	0.760471	-0.0172895	0.951235	0.46863	0.0780713	0.0547362	0.846376	0.0761751	0.787297	0.00482185	0.986393	-0.151683	0.589445	-0.438852	0.101737	-0.448238	0.0937974	0.158303	0.573103	0.252126	0.364652	-0.590728	0.0204074	-0.0367573	0.896525	0.0404927	0.886069	-0.297941	0.280789	0.156736	0.576955	-0.443483	0.0977631	0.00690028	0.980529	0.0760609	0.78761
ENSGALG00000013160	ENSGALG00000013160	CHMP5	420968	-1:85637791:85646774	black	-0.236	0.397114	-0.174357	0.534279	0.15648	0.577583	0.0595491	0.833035	-0.320066	0.244835	0.0467119	0.868701	0.0161558	0.954429	-0.373928	0.169751	0.0044207	0.987525	0.488165	0.064865	0.236494	0.396098	0.282559	0.307541	-0.227122	0.415617	0.158145	0.573491	-0.197423	0.480641	0.273227	0.324467	-0.196097	0.483654	0.616341	0.0144103	0.371753	0.172446	-0.248071	0.372675	-0.266734	0.336553	-0.165924	0.554527
ENSGALG00000001977	ENSGALG00000001977	LDB3	423610	1:3104861:3175701	black	-0.235546	0.398049	-0.133038	0.636453	0.0914641	0.745796	0.164199	0.558709	-0.395446	0.14458	-0.148055	0.598482	-0.188747	0.500507	-0.130056	0.644097	-0.118549	0.673906	0.199822	0.475214	0.231705	0.40601	0.60055	0.017917	0.0999678	0.722983	-0.086062	0.760392	0.0661664	0.814763	0.120734	0.668208	-0.284905	0.303369	0.592839	0.0198512	-0.0576466	0.838304	-0.131138	0.64132	-0.308337	0.263523	-0.0417993	0.882416
ENSGALG00000040335	ENSGALG00000040335	CEBPZ	421474	-1:33619522:33634859	black	-0.234768	0.399655	-0.227292	0.415258	-0.0360771	0.89843	-0.138066	0.623638	-0.0994075	0.72448	-0.216216	0.438946	-0.13497	0.631517	-0.0575216	0.83865	-0.0444868	0.874909	-0.00193769	0.994532	0.0179045	0.949502	0.536498	0.0392241	-0.134502	0.632712	-0.132922	0.636749	-0.123447	0.661158	-0.0500716	0.859342	-0.0853957	0.762198	0.513147	0.0504351	-0.175445	0.531689	-0.132629	0.637498	-0.0737963	0.793806	-0.0604362	0.830581
ENSGALG00000031574	ENSGALG00000031574	NA	NA	NA:NA:NA	black	0.234587	0.40003	0.271236	0.328147	-0.124036	0.659631	0.564703	0.0282897	-0.320126	0.244742	-0.252853	0.363224	0.0556565	0.843822	0.0615977	0.82737	0.0792437	0.778921	0.113739	0.686501	-0.245298	0.378216	0.074582	0.791654	0.355234	0.193829	-0.411192	0.127841	-0.245026	0.378761	0.383698	0.157989	-0.209861	0.452835	0.0912132	0.746472	0.334857	0.222466	-0.350692	0.199996	-0.263642	0.342394	-0.250977	0.366916
ENSGALG00000022030	ENSGALG00000022030	PGAP3	431201	-1:7042112:7045309	black	-0.234583	0.400037	-0.375326	0.168034	0.174817	0.533184	-0.219128	0.432651	-0.198929	0.477231	0.298308	0.280169	-0.231025	0.407427	-0.201813	0.470734	-0.1845	0.510371	-0.0641163	0.820415	0.0442472	0.875578	0.373835	0.169866	-0.186199	0.506413	-0.138588	0.622315	-0.210434	0.451575	-0.135018	0.631396	-0.176871	0.528307	0.496463	0.059777	0.020149	0.94318	-0.228861	0.411958	-0.137267	0.62567	-0.126024	0.654486
ENSGALG00000041232	ENSGALG00000041232	TMEM223	107049451	-1:6508637:6509706	black	-0.232366	0.404634	-0.241453	0.385971	-0.0464877	0.869327	-0.111532	0.692308	-0.0411237	0.884305	-0.208883	0.454994	-0.144217	0.6081	-0.0532849	0.850406	-0.0318419	0.910307	0.271561	0.327543	0.0906884	0.747887	0.649678	0.00875596	-0.119057	0.67258	-0.139982	0.618784	-0.114952	0.683317	-0.0428707	0.879423	-0.0964731	0.732333	0.702264	0.00351133	-0.108206	0.701088	0.0200911	0.943343	-0.064031	0.820651	-0.0988182	0.726055
ENSGALG00000008485	ENSGALG00000008485	CCNYL1	424093	-1:12138734:12173094	black	-0.231839	0.405732	-0.174705	0.533451	-0.264746	0.340303	-0.106977	0.704339	-0.161595	0.565045	0.0529762	0.851264	-0.0571727	0.839617	-0.106033	0.706843	0.00422809	0.988068	0.0271004	0.923624	-0.202899	0.4683	0.376445	0.166667	-0.134799	0.631954	-0.258344	0.352537	-0.122018	0.664869	0.0539138	0.848659	-0.232888	0.40355	0.344937	0.207986	-0.237154	0.394742	-0.209976	0.452582	-0.0499459	0.859692	-0.155735	0.57942
ENSGALG00000012144	ENSGALG00000012144	MIEF1	418012	-1:50613511:50619573	black	-0.231265	0.406928	-0.185868	0.507183	-0.168188	0.549057	-0.112419	0.689972	0.0412683	0.883901	-0.157003	0.576296	-0.0676041	0.810805	-0.0153918	0.956582	0.0318926	0.910164	0.178425	0.524629	0.0541198	0.848087	0.66564	0.00675646	-0.115415	0.682102	-0.120852	0.667902	-0.0556475	0.843846	-0.0206735	0.941704	-0.0412742	0.883884	0.618083	0.0140588	-0.0390788	0.890025	-0.103552	0.713432	-0.00362003	0.989784	-0.0433525	0.878077
ENSGALG00000026816	ENSGALG00000026816		NA	-1:7066866:7101589	black	-0.230802	0.407894	-0.234751	0.39969	-0.0910231	0.746985	-0.142681	0.611966	-0.0371521	0.895419	-0.115942	0.680722	-0.0997632	0.72353	-0.0505016	0.858145	-0.0447364	0.874213	0.152577	0.587228	0.0294064	0.917145	0.693642	0.0041299	-0.140774	0.616779	-0.11773	0.676044	-0.146266	0.602956	-0.0433029	0.878215	-0.11996	0.670224	0.668468	0.00644328	-0.122921	0.662523	-0.146046	0.603509	-0.0260945	0.926451	-0.0374931	0.894464
ENSGALG00000023872	ENSGALG00000023872	NIBAN2	771307	-1:2779784:2798309	black	-0.229629	0.410348	-0.293192	0.288894	0.127035	0.651877	-0.170597	0.543266	-0.176153	0.530009	-0.259781	0.349771	-0.180176	0.520503	-0.145215	0.605593	-0.142922	0.611359	0.100184	0.722405	-0.0781529	0.781896	0.563723	0.0286258	-0.119758	0.670749	0.0208735	0.941141	-0.1532	0.585684	-0.0964718	0.732337	-0.085151	0.762861	0.416187	0.122821	-0.121621	0.665901	-0.218988	0.432953	-0.152331	0.587837	0.184808	0.509652
ENSGALG00000029788	ENSGALG00000029788	CCK	414884	-1:43773646:43778740	black	-0.2272	0.415453	-0.126733	0.652656	0.0149122	0.957934	-0.162373	0.563149	0.112055	0.690931	-0.426098	0.113263	-0.087646	0.756104	-0.011928	0.966347	-0.0134235	0.96213	0.0725269	0.797284	0.348926	0.202426	0.162145	0.563706	-0.15623	0.578199	-0.414176	0.124826	0.568141	0.0271343	-0.0569052	0.840359	0.0381368	0.892661	0.258266	0.352688	-0.0532144	0.850602	0.422935	0.116256	0.060854	0.829426	-0.363461	0.182976
ENSGALG00000029834	ENSGALG00000029834	AIF1L	417179	1:6378663:6390710	black	-0.22711	0.415643	-0.183256	0.513276	-0.0911882	0.74654	-0.0422702	0.8811	-0.107164	0.703846	-0.212673	0.446663	-0.125179	0.656673	-0.0226789	0.936059	-0.0485843	0.863483	0.170393	0.543754	0.0973336	0.730028	0.693839	0.00411484	-0.0455916	0.871826	-0.106195	0.706413	-0.0728898	0.796289	-0.00799916	0.977428	-0.144108	0.608375	0.650403	0.00865622	-0.141032	0.616128	-0.102322	0.716706	-0.084445	0.764776	-0.0241429	0.93194
ENSGALG00000005368	ENSGALG00000005368	CEP120	426802	-1:81708876:81746900	black	-0.226489	0.416954	-0.258175	0.352864	0.0863211	0.75969	-0.193689	0.489145	-0.275197	0.320851	0.0324609	0.90857	-0.226182	0.417601	-0.179773	0.521451	-0.215594	0.440294	0.061482	0.82769	-0.238827	0.391316	0.157458	0.575178	-0.0807022	0.774948	-0.223613	0.423052	-0.09647	0.732342	-0.110303	0.695546	-0.233265	0.402766	0.294279	0.287028	-0.248281	0.372256	-0.190505	0.496451	-0.156007	0.578749	-0.183826	0.511944
ENSGALG00000008103	ENSGALG00000008103	CEP41	416684	-1:1605215:1614380	black	-0.225673	0.418678	-0.246823	0.375161	0.36022	0.187203	0.0685085	0.808317	-0.499795	0.0578176	-0.0156033	0.955986	-0.238247	0.392503	-0.25692	0.355293	-0.197521	0.480419	0.327146	0.233961	-0.0181698	0.948755	0.462665	0.0824605	0.00822327	0.976796	0.0472043	0.867329	-0.329397	0.230569	0.0742871	0.792462	-0.30757	0.264774	0.563355	0.0287528	0.0260421	0.926599	-0.195381	0.485282	-0.389253	0.151549	0.0261442	0.926311
ENSGALG00000012704	ENSGALG00000012704	MYLIP	420841	1:61479711:61493929	black	-0.225127	0.419836	-0.273984	0.323076	-0.0441763	0.875776	-0.106173	0.706471	-0.0403674	0.88642	-0.181581	0.5172	-0.123325	0.661475	-0.137182	0.625885	0.0639529	0.820866	0.197416	0.480657	-0.0024595	0.993059	0.621706	0.0133486	-0.181866	0.516532	-0.215266	0.441008	-0.142396	0.612685	0.0242022	0.931773	-0.027363	0.922886	0.60394	0.0171142	0.00296343	0.991637	-0.0534679	0.849897	-0.120156	0.669714	-0.0988317	0.726019
ENSGALG00000001918	ENSGALG00000001918	DNAJB5	427409	1:8525124:8538233	black	0.224357	0.421468	0.405865	0.133348	0.0116941	0.967007	0.24828	0.372259	0.0135364	0.961812	-0.174014	0.535096	0.421185	0.117934	0.117903	0.675593	0.0205982	0.941916	0.223577	0.423127	-0.0541636	0.847965	-0.534079	0.0402898	-0.00430789	0.987843	-0.397759	0.142033	0.264485	0.340797	0.365712	0.180077	-0.26232	0.344911	-0.533488	0.0405538	0.347752	0.204052	0.389397	0.151385	0.250972	0.366925	-0.304298	0.270152
ENSGALG00000009458	ENSGALG00000009458	MEGF6L	424998	-1:20477304:20626551	black	-0.223606	0.423067	-0.204819	0.46401	0.0481882	0.864587	0.0606909	0.829877	-0.123372	0.661354	-0.328832	0.231418	-0.218476	0.434056	-0.221855	0.426801	0.117822	0.675802	0.126825	0.652418	0.338633	0.216971	0.339277	0.216042	-0.0367761	0.896472	-0.375837	0.167409	0.602071	0.0175534	0.103141	0.714524	0.0408708	0.885012	0.220815	0.429028	-0.0808814	0.77446	0.386192	0.155075	-0.285955	0.301511	-0.157251	0.575687
ENSGALG00000003495	ENSGALG00000003495	ALDH9A1	424405	-1:5858744:5866421	black	-0.223434	0.423432	-0.0752958	0.789702	-0.0809665	0.774229	-0.0318598	0.910256	0.0331414	0.906661	-0.313361	0.255415	0.157492	0.575094	-0.206346	0.460611	0.199562	0.475801	0.176263	0.529747	0.304334	0.270094	0.534967	0.0398962	-0.276736	0.318042	-0.126363	0.653611	0.527473	0.0433109	0.269645	0.331102	-0.0262358	0.926054	0.206566	0.460123	-0.123344	0.661426	0.242916	0.38301	-0.0131324	0.962951	0.0793991	0.778498
ENSGALG00000007814	ENSGALG00000007814	ALPP	100859876	1:15724063:15726925	black	-0.223331	0.423651	0.110657	0.694613	-0.0848219	0.763753	0.0777214	0.783074	-0.194587	0.487092	-0.163863	0.559523	0.137614	0.624786	0.171076	0.542118	-0.214453	0.442776	0.406147	0.133052	0.0358438	0.899084	0.575895	0.0246598	0.0642832	0.819955	-0.0230104	0.935126	-0.078661	0.78051	0.125259	0.656465	-0.479634	0.0704165	0.512489	0.0507819	0.0433698	0.878028	-0.0965072	0.732242	0.128016	0.649346	-0.00197097	0.994438
ENSGALG00000041867	ENSGALG00000041867	IFNAR2	395664	1:106580169:106592227	black	-0.222354	0.425735	-0.155124	0.580927	0.331021	0.228139	-0.114288	0.68506	-0.0424866	0.880496	0.279169	0.313629	-0.089543	0.750978	-0.230928	0.407631	0.0295697	0.916686	0.225754	0.418507	0.306234	0.266963	-0.30996	0.260886	-0.113463	0.687227	0.467583	0.078829	0.257965	0.35327	-0.0560938	0.842608	0.15356	0.584792	-0.304697	0.269494	0.318519	0.247253	0.376439	0.166674	-0.137533	0.624994	0.268832	0.33262
ENSGALG00000042644	ENSGALG00000042644	NA	NA	NA:NA:NA	black	-0.221974	0.426547	-0.242114	0.384632	0.0755793	0.788926	-0.121095	0.667268	-0.187975	0.502293	-0.348724	0.202706	-0.14401	0.608621	-0.148914	0.596336	-0.0952926	0.7355	0.127523	0.650618	-0.106861	0.704647	0.409684	0.129384	-0.13394	0.634146	-0.211375	0.449506	-0.0639102	0.820984	-0.0097499	0.97249	-0.113708	0.686583	0.351832	0.198436	-0.0429701	0.879145	-0.127014	0.651931	-0.147873	0.598935	-0.0460509	0.870545
ENSGALG00000030028	ENSGALG00000030028	MRPS14	424436	1:7476798:7479199	black	-0.221399	0.427778	-0.177602	0.526575	0.00483945	0.986343	-0.250914	0.367041	0.161066	0.566337	0.193291	0.490056	0.0307583	0.913348	0.0419646	0.881954	-0.138118	0.623508	0.30081	0.275958	0.00598944	0.983098	0.36045	0.186901	-0.189631	0.498467	-0.0953297	0.7354	-0.205875	0.461657	-0.131938	0.639269	-0.0830842	0.76847	0.529912	0.0421766	0.582633	0.022652	-0.200853	0.472893	0.196659	0.482374	-0.160453	0.567836
ENSGALG00000009091	ENSGALG00000009091	TRUB1	423914	1:29011128:29039507	black	-0.221372	0.427835	-0.301352	0.275051	-0.133645	0.634902	-0.149895	0.593893	0.0183477	0.948254	-0.17009	0.544483	-0.19337	0.489874	-0.0722535	0.798033	0.0392851	0.889448	0.171612	0.540833	-0.00596638	0.983164	0.654136	0.00815621	-0.12905	0.646685	-0.170048	0.544582	-0.159587	0.569954	-0.0890354	0.752348	0.0135389	0.961805	0.652265	0.00840388	-0.116889	0.678242	-0.0541828	0.847912	-0.0898985	0.750018	-0.0667875	0.813053
ENSGALG00000034895	ENSGALG00000034895	NA	NA	NA:NA:NA	black	-0.219926	0.430936	-0.328376	0.232103	0.123455	0.661137	-0.244965	0.378884	-0.273973	0.323095	0.13454	0.632615	-0.261837	0.345832	-0.235103	0.398963	-0.223469	0.423359	-0.0583156	0.83645	-0.238201	0.392595	0.171031	0.542225	-0.124664	0.658005	-0.213753	0.444302	-0.128972	0.646886	-0.14943	0.59505	-0.195627	0.484723	0.298759	0.279407	-0.251427	0.366028	-0.289593	0.295129	-0.182798	0.514348	-0.159906	0.569172
ENSGALG00000015458	ENSGALG00000015458	ILDR2	418447	1:93259644:93288991	black	-0.218886	0.433174	-0.332623	0.22576	0.348989	0.202339	-0.253172	0.362599	-0.163938	0.559342	-0.0471998	0.867341	-0.184269	0.510909	-0.165808	0.554806	-0.225825	0.418358	0.241711	0.385448	0.0692609	0.806249	0.267131	0.335806	-0.238636	0.391706	-0.141128	0.615886	-0.081887	0.771724	-0.127412	0.650903	-0.22364	0.422994	0.343522	0.209982	-0.164178	0.55876	0.330272	0.229258	-0.0511363	0.856379	-0.0701163	0.803898
ENSGALG00000044832	ENSGALG00000044832	NA	NA	NA:NA:NA	black	-0.218658	0.433664	-0.285937	0.301542	-0.136624	0.627305	-0.207189	0.458742	-0.153651	0.584566	-0.126209	0.654009	-0.189338	0.499142	-0.158695	0.57214	-0.0728828	0.796308	-0.0561805	0.842368	-0.21988	0.431034	0.277166	0.317259	-0.148884	0.596412	-0.224772	0.420588	-0.12605	0.654419	-0.0929436	0.741812	-0.0870995	0.757583	0.307714	0.264539	-0.212395	0.447271	-0.296708	0.28288	-0.119516	0.671382	-0.129041	0.646708
ENSGALG00000017005	ENSGALG00000017005	CAB39L	418865	-1:170465095:170526727	black	0.218164	0.43473	0.339844	0.215226	0.138116	0.623512	0.159803	0.569426	0.158144	0.573492	-0.0733407	0.795053	0.379761	0.162662	0.124668	0.657994	-0.051949	0.854119	0.180185	0.52048	0.2864	0.300726	-0.1688	0.547583	0.0251705	0.92905	0.216012	0.439387	0.258823	0.351614	0.181564	0.51724	-0.0496236	0.860589	-0.226851	0.416189	0.354173	0.195259	0.100754	0.720884	0.255599	0.357859	0.138167	0.623384
ENSGALG00000039815	ENSGALG00000039815	MARF1	416595	-1:7930108:7951239	black	0.218003	0.435077	0.238563	0.391855	-0.196331	0.483121	-0.138961	0.62137	0.366869	0.178599	-0.147212	0.600588	0.294266	0.28705	0.272731	0.325382	-0.0385068	0.891626	-0.0344896	0.90288	-0.331245	0.227807	-0.640011	0.0101752	-0.106314	0.706097	-0.518493	0.0476825	0.0502956	0.858718	-0.0402901	0.886636	-0.00243846	0.993119	-0.462502	0.0825832	0.290896	0.292863	0.175341	0.531937	0.487607	0.0652184	-0.460293	0.0842536
ENSGALG00000006138	ENSGALG00000006138	HELZ2	419265	1:9732482:9752786	black	-0.217621	0.435903	-0.262368	0.344818	0.309703	0.261303	-0.222497	0.425431	0.0339735	0.904327	-0.0559712	0.842949	-0.0792113	0.77901	-0.195698	0.484562	-0.0907136	0.747819	0.10149	0.718922	0.406318	0.132874	0.0222137	0.937368	-0.316061	0.251122	-0.342577	0.211321	0.345877	0.206668	-0.0412429	0.883972	-0.000195749	0.999448	0.269135	0.332055	0.396227	0.143716	0.292097	0.290783	0.00431882	0.987812	-0.394647	0.145466
ENSGALG00000046035	ENSGALG00000046035	NA	NA	NA:NA:NA	black	-0.217412	0.436354	-0.117669	0.676204	-0.111199	0.693185	-0.164684	0.557531	0.238363	0.392265	-0.396127	0.143827	-0.0520741	0.853771	0.0402378	0.886782	0.048374	0.864069	0.0661669	0.814762	0.415465	0.123538	0.334727	0.222658	-0.135959	0.628997	-0.256044	0.356993	0.586333	0.021604	-0.0863034	0.759738	0.136448	0.627753	0.300789	0.275993	-0.0119243	0.966358	0.34447	0.208643	0.115271	0.68248	-0.177539	0.526725
ENSGALG00000008866	ENSGALG00000008866	WDPCP	428553	-1:9992627:10131875	black	0.216499	0.43833	0.171643	0.540759	-0.589409	0.020761	0.0413232	0.883747	0.420427	0.118667	-0.194251	0.48786	0.47947	0.0705261	0.0498182	0.860047	0.433977	0.106041	0.0329377	0.907232	-0.207246	0.458615	0.49816	0.0587731	-0.300534	0.276421	-0.198357	0.478526	-0.305742	0.267771	0.351861	0.198396	0.124024	0.659662	0.376528	0.166565	-0.0618051	0.826797	-0.335931	0.220894	0.304648	0.269575	-0.112888	0.688738
ENSGALG00000002313	ENSGALG00000002313	SLC38A7	107052162	-1:1468224:1475359	black	-0.215654	0.440164	-0.356531	0.192091	0.288566	0.296923	-0.0850617	0.763103	-0.236981	0.395098	-0.066244	0.81455	-0.342085	0.212021	-0.178028	0.525569	-0.112339	0.690181	0.279489	0.313051	0.0285906	0.919436	0.251399	0.366083	-0.0689938	0.806983	-0.247981	0.372853	-0.12275	0.662968	-0.100277	0.722158	-0.121646	0.665835	0.360748	0.18651	0.00480836	0.986431	0.330506	0.228908	-0.26044	0.348506	-0.143819	0.609101
ENSGALG00000004323	ENSGALG00000004323	RASAL2	429069	-1:6831975:6972643	black	-0.215385	0.440748	-0.324891	0.237392	-0.173988	0.535158	-0.300419	0.276614	0.222238	0.425984	-0.0270663	0.923719	0.0915137	0.745662	-0.257872	0.35345	0.230933	0.407621	0.141299	0.615452	0.00991853	0.972014	0.688334	0.00455182	-0.48936	0.0641138	-0.0478912	0.865414	-0.154044	0.583595	0.0742795	0.792483	0.142543	0.612315	0.596635	0.01888	0.0501454	0.859136	-0.204679	0.464322	0.0511767	0.856267	0.0187339	0.947166
ENSGALG00000043314	ENSGALG00000043314	SNORA75	112533087	-1:15431560:15431701	black	-0.21351	0.444833	-0.240947	0.386997	0.270044	0.33036	0.0237386	0.933077	-0.294183	0.287192	0.237244	0.394556	-0.510906	0.0516228	0.0485285	0.863639	-0.264063	0.341595	-0.0986875	0.726405	0.251262	0.366354	0.451362	0.0912552	0.35843	0.189565	0.508536	0.0529013	-0.212548	0.446935	-0.365973	0.179743	0.00617653	0.982571	0.475514	0.0732161	-0.161833	0.564466	-0.233205	0.402893	-0.354461	0.19487	0.372118	0.171991
ENSGALG00000030291	ENSGALG00000030291	IRF9	395243	-1:10063682:10066572	black	-0.213365	0.44515	-0.278216	0.315353	-0.281021	0.310295	-0.144264	0.607981	0.150013	0.593598	-0.33094	0.228261	-0.0201649	0.943136	-0.166031	0.554267	0.299336	0.278434	0.196455	0.482838	0.0238538	0.932753	0.632442	0.0114066	-0.309216	0.262093	-0.0598469	0.832211	-0.0836881	0.76683	0.0802917	0.776066	0.187594	0.503175	0.437815	0.102642	-0.048133	0.86474	0.0419246	0.882066	-0.0556857	0.84374	0.0898809	0.750066
ENSGALG00000007181	ENSGALG00000007181	PGS1	422087	-1:9820165:9837087	black	-0.210501	0.451427	-0.155605	0.579739	-0.248476	0.371869	-0.27113	0.328343	0.255097	0.358836	0.0282499	0.920393	0.104422	0.711118	-0.0805977	0.775233	0.128496	0.64811	-0.0387219	0.891024	0.0871464	0.757456	0.239561	0.389818	-0.339577	0.21561	-0.373037	0.170851	0.319589	0.24558	0.0163708	0.953823	0.0510908	0.856506	0.206253	0.460818	0.10493	0.70977	0.0397857	0.888047	0.198069	0.479178	-0.271463	0.327725
ENSGALG00000012532	ENSGALG00000012532	TXN2	426978	1:51727168:51734903	black	-0.210246	0.451989	-0.510428	0.0518788	-0.0943652	0.73799	-0.371357	0.172939	0.134358	0.633079	0.0867704	0.758473	-0.368858	0.176076	-0.299147	0.278752	0.214418	0.442852	-0.10659	0.705365	-0.395959	0.144013	-0.0102485	0.971084	-0.276349	0.318746	-0.375212	0.168174	-0.218157	0.434746	-0.2366	0.395881	0.39801	0.141759	0.152474	0.587482	0.0977402	0.728939	-0.112824	0.688906	-0.227896	0.413986	-0.280353	0.311495
ENSGALG00000000645	ENSGALG00000000645		NA	-1:607572:614042	black	-0.208052	0.456829	-0.0286939	0.919146	-0.0641136	0.820423	0.0639488	0.820877	0.00298582	0.991574	-0.431121	0.108621	-0.0585254	0.835869	0.0373774	0.894788	0.0559592	0.842982	0.122028	0.664844	0.418733	0.120314	0.276636	0.318224	-0.0064948	0.981673	-0.386161	0.155111	0.619175	0.0138418	0.0845747	0.764424	-0.047403	0.866775	0.16689	0.552189	0.0177916	0.94982	0.495577	0.060306	-0.0176259	0.950287	-0.216159	0.439068
ENSGALG00000043114	ENSGALG00000043114	NA	NA	NA:NA:NA	black	-0.207168	0.458787	-0.446092	0.0955728	-0.143422	0.610099	-0.405231	0.134014	0.187597	0.503169	0.422756	0.116426	-0.260593	0.348211	-0.25093	0.367009	0.178131	0.525326	-0.321114	0.243207	-0.191511	0.494137	0.183381	0.512984	-0.283592	0.305699	-0.0464631	0.869395	-0.183692	0.512256	-0.258582	0.352079	0.350382	0.200421	0.253864	0.361243	-0.0991907	0.725059	-0.324414	0.238122	-0.112776	0.689033	-0.0608148	0.829534
ENSGALG00000031724	ENSGALG00000031724	NA	NA	NA:NA:NA	black	0.206637	0.459965	0.0634797	0.822172	-0.0500731	0.859337	0.295777	0.284465	-0.15294	0.586328	-0.233677	0.401914	-0.24198	0.384902	0.179264	0.522651	0.0565176	0.841433	-0.17031	0.543953	-0.288372	0.297262	0.00936695	0.97357	0.348598	0.20288	-0.397583	0.142226	-0.316042	0.251153	-0.00871921	0.975397	0.00140802	0.996026	0.0110254	0.968892	-0.239493	0.389956	0.0841168	0.765666	-0.22046	0.42979	-0.181647	0.517045
ENSGALG00000000946	ENSGALG00000000946	PFDN1	416142	-1:2140881:2170325	black	-0.206167	0.46101	-0.382847	0.158991	-0.110955	0.693827	-0.314696	0.253288	-0.0584497	0.836079	0.00760236	0.978548	-0.291765	0.291357	-0.204965	0.463685	-0.0193015	0.945567	-0.275397	0.320484	-0.258685	0.35188	0.164055	0.559057	-0.187379	0.503676	-0.250811	0.367244	-0.139015	0.621232	-0.213159	0.4456	0.103455	0.71369	0.262577	0.34442	-0.240934	0.387025	-0.362405	0.184346	-0.157427	0.575254	-0.18492	0.50939
ENSGALG00000022813	ENSGALG00000022813	NDUFV3	418541	1:110902176:110909972	black	-0.204822	0.464003	-0.224978	0.420151	-0.0977858	0.728817	-0.140594	0.617234	0.0122332	0.965486	-0.118866	0.673078	-0.0957958	0.73415	-0.0854928	0.761934	-0.00993297	0.971974	0.086719	0.758613	0.20129	0.47191	0.557594	0.0307966	-0.182085	0.516018	-0.186903	0.504779	-0.00402172	0.988651	-0.0270629	0.923729	-0.0524453	0.852739	0.705427	0.00330387	-0.0868674	0.758211	-0.112473	0.689831	-0.0233385	0.934203	-0.231181	0.407103
ENSGALG00000046318	ENSGALG00000046318	NA	NA	NA:NA:NA	black	-0.204356	0.465043	-0.106836	0.704714	0.0512998	0.855924	0.064687	0.818841	-0.470044	0.077056	0.0853913	0.76221	-0.396761	0.143128	0.0428492	0.879482	-0.326257	0.23531	-0.119849	0.670513	0.0884151	0.754025	0.0796772	0.77774	0.301256	0.275211	0.113015	0.688405	-0.185736	0.50749	-0.202467	0.469267	-0.279116	0.313724	0.421425	0.117703	-0.33339	0.224626	-0.30944	0.261729	-0.283403	0.306035	-0.158614	0.57234
ENSGALG00000023066	ENSGALG00000023066	DNAJA1	427376	1:70797443:70805858	black	-0.204264	0.465247	-0.125268	0.656442	0.051869	0.854341	-0.260721	0.347966	0.199388	0.476196	0.477711	0.071713	0.340368	0.214473	-0.321917	0.241963	0.230392	0.40875	0.277776	0.316152	0.0586634	0.835487	-0.0924302	0.743194	-0.528602	0.0427832	0.225762	0.418491	0.0943901	0.737923	0.21086	0.450639	0.0655501	0.816462	-0.220593	0.429504	0.538752	0.0382498	0.12996	0.644346	0.168993	0.54712	0.153151	0.585805
ENSGALG00000011697	ENSGALG00000011697	SEC22A	424250	1:26927568:26942616	black	-0.204004	0.465829	-0.206674	0.459884	-0.0803111	0.776013	-0.128487	0.648134	0.00735393	0.979249	-0.178224	0.525106	-0.103467	0.713657	0.00239321	0.993246	-0.0568572	0.840492	0.156853	0.576667	0.0802284	0.776238	0.673907	0.00587313	-0.106834	0.704719	-0.141441	0.615094	-0.100458	0.721676	-0.0688246	0.807448	-0.091848	0.744762	0.670054	0.00627272	-0.0900039	0.749734	-0.0884105	0.754037	0.00297832	0.991595	-0.0646465	0.818953
ENSGALG00000003162	ENSGALG00000003162	RETREG3	772215	-1:7795407:7801973	black	-0.203033	0.468001	-0.333759	0.224081	0.21418	0.443371	-0.171236	0.541733	-0.190145	0.497281	0.278728	0.314427	-0.227348	0.41514	-0.219796	0.431216	-0.205192	0.463178	0.12484	0.657549	0.373275	0.170557	0.374799	0.16868	-0.168244	0.548924	0.24016	0.388598	-0.252217	0.364474	-0.139262	0.620607	-0.135531	0.630086	0.790427	0.000452459	-0.0714736	0.800173	-0.215766	0.439921	-0.15802	0.573796	-0.118908	0.672967
ENSGALG00000003082	ENSGALG00000003082	DPH1	417564	1:5643569:5658310	black	-0.202322	0.469593	-0.199848	0.475157	-0.122813	0.662805	-0.0638013	0.821284	-0.015135	0.957306	-0.218625	0.433736	-0.122233	0.664311	-0.00345888	0.990239	-0.00412383	0.988363	0.134213	0.633449	0.106276	0.706197	0.711543	0.00293049	-0.062058	0.826098	-0.120518	0.668771	-0.064856	0.818375	-0.0363501	0.897665	-0.0565139	0.841444	0.629365	0.011939	-0.0740281	0.793171	-0.0929888	0.741691	-0.0545164	0.846986	-9.41e-05	0.999734
ENSGALG00000006137	ENSGALG00000006137	ARHGAP22	423779	-1:19118047:19156066	black	-0.201794	0.470777	-0.153367	0.58527	0.0710528	0.801327	-0.0645261	0.819285	-0.124343	0.658836	-0.0654606	0.816708	-0.165366	0.555878	0.139237	0.62067	-0.227469	0.414887	0.132698	0.637324	-0.0495694	0.86074	0.762937	0.000938269	0.111634	0.692038	0.0380025	0.893038	-0.2021	0.470091	-0.166814	0.552375	-0.228441	0.412841	0.492642	0.0620828	-0.126225	0.653967	-0.0992089	0.725011	-0.0153003	0.95684	0.2832	0.306397
ENSGALG00000006963	ENSGALG00000006963	ENDOV	422079	-1:9480639:9489310	black	-0.20126	0.471976	-0.194639	0.486975	-0.140655	0.617081	-0.0887166	0.75321	0.0302743	0.914707	-0.213697	0.444425	-0.105436	0.708426	0.00963266	0.972821	0.00332088	0.990628	0.149911	0.593851	0.128277	0.648675	0.678655	0.00540866	-0.0881519	0.754736	-0.140469	0.617551	-0.0525236	0.852522	-0.0457692	0.871331	-0.0434054	0.877929	0.650714	0.00861368	-0.0640573	0.820578	-0.056612	0.841171	-0.0142059	0.959925	-0.0583715	0.836296
ENSGALG00000004637	ENSGALG00000004637	SHPK	417607	1:6800175:6808318	black	-0.200527	0.473627	-0.268713	0.332841	0.0539288	0.848617	-0.0442894	0.87546	0.0291957	0.917736	-0.278573	0.314706	-0.0136525	0.961485	-0.292494	0.290099	0.251546	0.365794	0.392645	0.147705	0.248817	0.371192	0.646805	0.00916044	-0.30018	0.277015	-0.0407807	0.885264	0.195418	0.485199	0.19317	0.490333	0.0797082	0.777655	0.358381	0.189629	-0.0567343	0.840832	0.415524	0.123479	-0.159092	0.571168	0.18617	0.50648
ENSGALG00000042792	ENSGALG00000042792	NA	NA	NA:NA:NA	black	-0.199352	0.476276	-0.175459	0.531656	-0.0787501	0.780267	-0.0107457	0.969681	-0.120444	0.668964	-0.296608	0.28305	-0.228248	0.413246	0.0602065	0.831217	-0.0693382	0.806036	0.326543	0.234876	-0.0665569	0.813688	0.488314	0.0647715	0.0619422	0.826418	-0.270279	0.329922	-0.138851	0.621647	-0.0746293	0.791525	-0.160991	0.56652	0.521068	0.0463971	-0.147378	0.600174	0.187917	0.502428	-0.100309	0.722072	-0.140366	0.617812
ENSGALG00000005416	ENSGALG00000005416	TTC39B	427354	-1:31833333:31861093	black	-0.199268	0.476466	-0.314299	0.253919	0.246638	0.375532	-0.173233	0.536959	-0.177911	0.525846	0.228048	0.413667	-0.227343	0.415151	-0.205601	0.462269	-0.221277	0.428039	0.11948	0.671476	0.458347	0.0857456	0.357992	0.190146	-0.165414	0.555762	0.228507	0.412702	-0.146554	0.602236	-0.146177	0.603179	-0.139976	0.618799	0.791123	0.000443578	-0.156037	0.578675	-0.110967	0.693796	-0.139697	0.619504	-0.146194	0.603137
ENSGALG00000009686	ENSGALG00000009686	PPP1R9A	420568	1:23715866:23846194	black	-0.198492	0.478221	-0.215432	0.440646	-0.0405419	0.885932	-0.0525787	0.852368	-0.117556	0.676498	0.07764	0.783296	-0.178211	0.525137	-0.0629428	0.823654	-0.0887155	0.753213	-0.04118	0.884148	0.181374	0.517685	0.594628	0.0193889	-0.0179517	0.949369	-0.0314383	0.91144	-0.114581	0.684291	-0.0722188	0.798128	-0.0828363	0.769144	0.688312	0.00455358	0.0169035	0.952322	-0.381627	0.160436	-0.133257	0.635892	-0.0795786	0.778009
ENSGALG00000037242	ENSGALG00000037242		NA	1:41677647:41708292	black	-0.198349	0.478542	-0.160062	0.568793	-0.0311537	0.912238	0.0195365	0.944905	-0.142084	0.61347	-0.24241	0.384031	-0.132852	0.636928	0.0140007	0.960503	-0.0596133	0.832858	0.341263	0.213193	-0.0145358	0.958995	0.770381	0.000777572	0.0353358	0.900508	0.00570617	0.983898	-0.217909	0.435281	-0.00253256	0.992853	-0.173371	0.53663	0.617997	0.014076	-0.129683	0.645056	-0.0279428	0.921256	-0.115271	0.68248	0.159357	0.570518
ENSGALG00000002375	ENSGALG00000002375	NOTCH1	395655	1:8107664:8143170	black	-0.198145	0.479005	-0.285892	0.301623	-0.133582	0.635062	-0.185303	0.508499	-0.158904	0.571629	0.238311	0.392372	-0.193836	0.488809	-0.133255	0.635899	-0.0950032	0.736277	-0.0526037	0.852299	-0.217634	0.435874	0.359386	0.188301	-0.104309	0.711419	-0.190165	0.497235	-0.240361	0.388189	-0.107755	0.702281	-0.178184	0.5252	0.411332	0.127699	-0.23183	0.40575	-0.312536	0.256737	-0.0995864	0.724002	-0.118857	0.673101
ENSGALG00000000374	ENSGALG00000000374	RNPEP	421165	-1:617184:633046	black	-0.196511	0.482711	-0.21221	0.447676	-0.0649253	0.818184	-0.114066	0.685642	-0.0173147	0.951164	-0.160501	0.567719	-0.0911485	0.746647	-0.0178628	0.949619	-0.0450017	0.873472	0.13229	0.638366	0.0601845	0.831277	0.732701	0.00189002	-0.110768	0.694321	-0.0968179	0.731409	-0.123599	0.660765	-0.0456096	0.871776	-0.101318	0.71938	0.635307	0.0109275	-0.120828	0.667965	-0.112369	0.690104	-0.0172501	0.951345	0.0338883	0.904566
ENSGALG00000036552	ENSGALG00000036552	PDAP1	416491	-1:4772825:4781135	black	-0.196467	0.482811	-0.1436	0.609652	-0.0328052	0.907604	0.024458	0.931053	-0.100757	0.720876	-0.213893	0.443997	-0.152337	0.587822	0.0632601	0.822778	-0.0823394	0.770494	0.218361	0.434306	0.124535	0.65834	0.79288	0.000421795	0.082147	0.771017	0.0244478	0.931082	-0.0831542	0.76828	-0.0515807	0.855143	-0.133469	0.63535	0.616819	0.0143133	-0.11141	0.692628	-0.0468386	0.868348	-0.09316	0.74123	0.175792	0.530866
ENSGALG00000000151	ENSGALG00000000151	ADAMTS19	415600	-1:45410076:45570562	black	-0.194887	0.486408	-0.292579	0.289951	0.314257	0.253986	-0.11393	0.686	-0.259992	0.349365	0.268215	0.333774	-0.237147	0.394757	-0.235321	0.398514	-0.236381	0.39633	0.158995	0.571405	0.455242	0.0881647	0.347216	0.204798	-0.123778	0.660301	0.226696	0.416515	-0.13456	0.632564	-0.100304	0.722085	-0.197236	0.481065	0.782314	0.000567067	-0.176112	0.530106	-0.0864243	0.759411	-0.199877	0.475091	-0.146478	0.602427
ENSGALG00000030533	ENSGALG00000030533	PGLS	430442	1:474865:478263	black	-0.194352	0.48763	-0.386787	0.154386	-0.0900421	0.749631	-0.346741	0.205461	0.255716	0.357631	-0.19251	0.491845	-0.189078	0.499742	-0.080198	0.776321	0.0773106	0.784196	-0.0247647	0.930191	-0.0423272	0.880941	0.567216	0.0274416	-0.265837	0.33824	-0.255181	0.358672	-0.045945	0.87084	-0.223814	0.422623	0.243093	0.382653	0.493403	0.0616182	-0.0266853	0.924791	-0.0403054	0.886593	0.0201625	0.943142	-0.0521614	0.853528
ENSGALG00000026716	ENSGALG00000026716	CELF5	425867	1:1399710:1430678	black	0.193223	0.490211	0.27309	0.32472	0.171207	0.541803	0.236186	0.396732	0.117109	0.677668	0.0620799	0.826038	0.0246893	0.930403	0.262156	0.345224	-0.0401238	0.887101	0.0472496	0.867202	0.320533	0.244108	-0.273953	0.323132	0.329514	0.230393	0.267767	0.334613	0.205154	0.463262	-0.0589405	0.83472	0.102353	0.716622	-0.261306	0.346846	0.186671	0.505316	0.349251	0.201977	0.0690074	0.806946	0.151906	0.588893
ENSGALG00000010193	ENSGALG00000010193	ZNF410	423340	1:37880445:37899754	black	-0.193032	0.490648	-0.291076	0.292552	0.139974	0.618802	-0.161907	0.564285	-0.105934	0.707106	0.254426	0.360145	-0.244106	0.38061	-0.131017	0.641631	-0.11875	0.673379	0.0132682	0.962568	-0.0806007	0.775225	0.469905	0.0771548	-0.0359239	0.89886	-0.0901861	0.749242	-0.138273	0.623114	-0.155922	0.578959	-0.0645986	0.819085	0.477948	0.0715525	-0.0660935	0.814964	-0.217655	0.435829	-0.159502	0.570162	-0.000173457	0.99951
ENSGALG00000017090	ENSGALG00000017090	POMP	418925	-1:177125675:177134363	black	-0.191846	0.493368	-0.130405	0.643201	-0.18825	0.501657	0.0990934	0.725319	-0.171565	0.540945	-0.0628477	0.823917	0.00934773	0.973624	-0.168626	0.548002	0.157408	0.575302	0.217199	0.436815	-0.0260908	0.926462	0.592835	0.0198521	-0.120183	0.669642	-0.21954	0.431765	-0.154656	0.582084	0.25757	0.354033	-0.156749	0.576921	0.535483	0.0396684	0.0969837	0.730965	-0.206837	0.45952	-0.175874	0.530672	-0.124506	0.658415
ENSGALG00000006633	ENSGALG00000006633	TMEM243	418647	1:8021261:8028175	black	0.191348	0.494511	0.0516496	0.854951	0.150945	0.59128	0.0699956	0.80423	-0.0318398	0.910313	0.224267	0.421661	-0.132233	0.638514	-0.03206	0.909695	0.0136163	0.961587	-0.38447	0.157083	-0.142944	0.611303	-0.645402	0.00936318	0.191408	0.494374	0.0693726	0.805942	0.0966351	0.731899	-0.112747	0.68911	0.227616	0.414575	-0.680905	0.00519892	0.060055	0.831636	-0.0321154	0.909539	-0.146388	0.602651	0.102144	0.717179
ENSGALG00000039573	ENSGALG00000039573	RASAL3	426166	1:792438:834813	black	-0.190699	0.496004	-0.174046	0.53502	-0.12304	0.662215	-0.0400129	0.887411	-0.0303486	0.914498	-0.196019	0.483831	-0.0671839	0.811962	-0.0405212	0.88599	0.0306562	0.913635	0.226686	0.416537	0.0441644	0.875809	0.732009	0.00191849	-0.0868954	0.758135	-0.0966445	0.731874	-0.121615	0.665916	0.0347395	0.902179	-0.0860088	0.760536	0.649235	0.00881743	-0.0847957	0.763825	-0.104488	0.710944	-0.0623214	0.82537	0.0115936	0.96729
ENSGALG00000006038	ENSGALG00000006038	TGFBR3	374251	1:14742786:14850067	black	-0.190504	0.496454	-0.127226	0.651383	0.0844242	0.764832	0.266763	0.336497	-0.504619	0.0550649	0.0388895	0.890555	-0.0975435	0.729466	-0.306348	0.266776	0.0325904	0.908206	0.393357	0.146906	-0.141507	0.614928	0.292569	0.289969	0.0329235	0.907272	-0.134318	0.633183	-0.292834	0.289512	0.327781	0.233002	-0.277189	0.317218	0.359659	0.187941	0.437267	0.103123	-0.331575	0.227316	-0.440641	0.100189	-0.113851	0.686206
ENSGALG00000029851	ENSGALG00000029851	NA	NA	NA:NA:NA	black	0.19018	0.4972	0.0996051	0.723952	-0.0878623	0.755519	0.222811	0.424761	-0.121258	0.666844	-0.40009	0.139497	-0.323456	0.23959	0.345179	0.207646	-0.219831	0.43114	-0.19931	0.47637	-0.151866	0.588991	0.0849485	0.76341	0.499355	0.0580736	-0.278011	0.315724	-0.263327	0.342993	-0.237152	0.394746	-0.0190413	0.9463	0.323784	0.239088	-0.211895	0.448367	-0.281633	0.309198	-0.126906	0.65221	-0.255137	0.358757
ENSGALG00000004555	ENSGALG00000004555	RBM22	416270	1:13782576:13790479	black	-0.190088	0.497412	-0.258353	0.35252	0.139709	0.619475	-0.241758	0.385353	-0.0424946	0.880473	0.0392524	0.889539	-0.12267	0.663174	-0.0248841	0.929855	-0.249192	0.370447	0.0389714	0.890326	0.237876	0.393261	0.534023	0.0403147	-0.173155	0.537145	-0.00761015	0.978526	-0.109215	0.698419	-0.181554	0.517263	-0.188426	0.50125	0.649163	0.00882755	-0.150825	0.591578	-0.0778439	0.78274	0.0644244	0.819565	-0.052962	0.851303
ENSGALG00000017190	ENSGALG00000017190	CEP126	100859489	-1:184104312:184140429	black	0.189601	0.498534	0.146027	0.603557	0.0409501	0.88479	0.34155	0.212783	-0.0566658	0.841022	0.0863201	0.759693	0.00799016	0.977454	-0.131207	0.641143	0.26127	0.346915	-0.0643637	0.819733	0.0845446	0.764506	-0.0296618	0.916427	0.226247	0.417465	0.393339	0.146927	0.0252223	0.928904	0.199391	0.476187	0.28438	0.304299	-0.167713	0.550202	0.102033	0.717474	-0.241113	0.386661	-0.31451	0.253584	0.330264	0.229271
ENSGALG00000013196	ENSGALG00000013196	ANKS6	420977	-1:87809146:87849912	black	0.189576	0.498592	0.268089	0.334009	0.190516	0.496427	0.268203	0.333796	-0.185865	0.507191	0.231454	0.406533	0.126341	0.653669	-0.0688291	0.807436	0.00857236	0.975811	-0.106538	0.705504	0.149092	0.595893	-0.662616	0.00710461	0.142802	0.611661	0.160515	0.567685	0.193515	0.489542	0.206026	0.461322	-0.0609507	0.829158	-0.522869	0.0455136	0.105043	0.709469	0.079746	0.777553	-0.0979816	0.728293	-0.0542735	0.84766
ENSGALG00000012396	ENSGALG00000012396	PTGER2	100034745	1:58273131:58276100	black	0.188822	0.500335	0.194201	0.487975	0.0971759	0.73045	0.147129	0.600796	-0.182996	0.513882	0.242761	0.383322	0.16505	0.556643	-0.135137	0.631092	0.00947229	0.973273	-0.0834039	0.767602	-0.320643	0.243937	-0.487757	0.0651231	0.0451186	0.873146	-0.0732949	0.795179	0.0203142	0.942715	0.221411	0.427752	-0.144715	0.606849	-0.521846	0.0460141	-0.0600263	0.831715	-0.115633	0.681531	-0.0659998	0.815222	-0.0283996	0.919973
ENSGALG00000007527	ENSGALG00000007527	ADARB1	374087	1:7259184:7325166	black	-0.188538	0.500991	-0.227682	0.414438	0.227198	0.415456	-0.11625	0.679916	-0.236398	0.396296	-0.298616	0.279648	-0.151407	0.59013	-0.145915	0.603838	-0.227659	0.414485	0.16527	0.55611	0.153449	0.585068	0.455641	0.0878508	-0.119996	0.670131	0.0168701	0.952416	-0.0632273	0.822869	-0.0522459	0.853293	-0.19007	0.497454	0.538293	0.0384467	-0.184217	0.511029	-0.101855	0.71795	-0.133957	0.634103	-0.000960165	0.99729
ENSGALG00000033232	ENSGALG00000033232	LMAN2	100859676	-1:10817553:10823089	black	0.188339	0.501452	0.00758539	0.978596	-0.278356	0.315099	-0.182775	0.514401	0.43011	0.109544	0.204415	0.464912	0.130681	0.642492	-0.0872497	0.757176	0.309046	0.26237	-0.398329	0.141411	0.0709953	0.801485	-0.369421	0.175366	-0.222596	0.425219	0.132328	0.638271	0.201674	0.471047	-0.0518074	0.854513	0.447884	0.0940889	-0.327329	0.233685	-0.254332	0.360328	-0.0117262	0.966916	0.165017	0.556722	-0.00599184	0.983092
ENSGALG00000039440	ENSGALG00000039440		NA	-1:43625547:43626903	black	-0.187307	0.503841	-0.307681	0.264594	-0.0259512	0.926854	-0.322113	0.241661	0.174535	0.533856	-0.236893	0.395278	-0.0102478	0.971086	-0.141853	0.614054	0.0451373	0.873094	0.225465	0.419118	-0.0559859	0.842908	0.681625	0.00513323	-0.361165	0.185964	-0.0660243	0.815155	-0.149402	0.595119	-0.0670487	0.812334	0.0639194	0.820959	0.58856	0.020991	-0.158551	0.572495	-0.0337911	0.904839	0.0713409	0.800537	0.0659656	0.815317
ENSGALG00000032910	ENSGALG00000032910	NA	NA	NA:NA:NA	black	-0.187029	0.504485	-0.335286	0.221838	-0.0495133	0.860896	-0.305036	0.268933	0.11926	0.672048	-0.0871508	0.757444	-0.183505	0.512693	-0.0868393	0.758287	-0.0398484	0.887872	-0.122097	0.664665	0.17004	0.544602	0.626128	0.0125201	-0.220925	0.428792	-0.0309927	0.91269	-0.0276362	0.922118	-0.21589	0.439652	0.0997506	0.723564	0.652923	0.00831617	-0.320271	0.244516	-0.164728	0.557424	0.00180736	0.9949	-0.0126346	0.964355
ENSGALG00000045412	ENSGALG00000045412	NA	NA	NA:NA:NA	black	-0.186884	0.504823	-0.278828	0.314245	0.364971	0.181028	-0.200055	0.474689	-0.0839297	0.766174	-0.10461	0.71062	-0.239749	0.389434	-0.188256	0.501643	-0.137486	0.625113	0.15599	0.578792	0.241444	0.385988	0.073814	0.793757	-0.167781	0.55004	-0.326683	0.234663	0.373165	0.170693	-0.117559	0.676491	-0.0801623	0.776418	0.199728	0.475428	-0.249003	0.370822	0.586044	0.0216844	-0.104993	0.709603	-0.247567	0.373678
ENSGALG00000016217	ENSGALG00000016217	KDM6A	418556	-1:112149411:112296680	black	-0.186521	0.505667	-0.141062	0.616053	-0.386989	0.154153	-0.188297	0.501548	0.0638765	0.821077	-0.025888	0.927032	0.120392	0.669099	-0.0861685	0.760103	0.116992	0.677973	0.0417418	0.882577	-0.24121	0.386463	0.407441	0.131703	-0.288742	0.296615	-0.301506	0.274793	-0.0786663	0.780496	0.102581	0.716016	-0.126665	0.652833	0.26943	0.331504	-0.112695	0.689245	-0.201708	0.470971	0.125685	0.655363	-0.125113	0.656842
ENSGALG00000012834	ENSGALG00000012834	AKR1D1	418107	1:56550352:56584722	black	-0.186229	0.506344	-0.212227	0.447638	0.0137757	0.961138	-0.120427	0.669007	-0.0532154	0.850599	-0.164748	0.557375	-0.152372	0.587736	-0.0428874	0.879376	-0.0513902	0.855673	0.0288347	0.91875	0.0774468	0.783823	0.448627	0.0934784	-0.117071	0.677766	-0.230629	0.408255	-0.108771	0.699593	-0.0641123	0.820426	-0.0602496	0.831097	0.589405	0.0207622	-0.0875992	0.756231	-0.0737586	0.793909	-0.0650211	0.81792	-0.233695	0.401876
ENSGALG00000012662	ENSGALG00000012662	NUAK1	418074	1:53933066:53978011	black	-0.186179	0.506461	-0.21045	0.451539	-0.0922548	0.743666	-0.0822063	0.770856	-0.00660091	0.981373	-0.123366	0.661369	-0.162418	0.56304	0.00303255	0.991442	-0.0231677	0.934683	0.115143	0.682818	0.104341	0.711334	0.630501	0.0117403	-0.0504653	0.858246	-0.156481	0.577582	-0.102612	0.715932	-0.0784672	0.781039	-0.0531258	0.850848	0.669166	0.00636778	-0.102974	0.714968	-0.0661768	0.814735	-0.0557192	0.843648	-0.104685	0.710419
ENSGALG00000009622	ENSGALG00000009622	LOC422426	422426	1:24946440:24954701	black	-0.18499	0.509227	-0.316811	0.249938	0.160612	0.567446	-0.168251	0.548907	-0.149065	0.59596	-0.272114	0.326522	-0.25164	0.365609	-0.116079	0.680364	-0.156066	0.578604	0.151181	0.590693	-0.0133629	0.962301	0.41831	0.120728	-0.136337	0.628033	-0.29895	0.279084	-0.149206	0.595609	-0.119691	0.670926	-0.123749	0.660375	0.554673	0.0318737	-0.155107	0.580969	0.0505832	0.857918	-0.132777	0.637121	-0.208417	0.456022
ENSGALG00000004272	ENSGALG00000004272	ASB1	424030	1:6003930:6013310	black	-0.183167	0.513483	-0.194083	0.488244	-0.11293	0.688628	-0.0860602	0.760397	-0.00272888	0.992299	-0.237731	0.393558	-0.108894	0.699268	-0.00169021	0.99523	-0.00530658	0.985025	0.134637	0.632368	-0.0160237	0.954801	0.63613	0.0107929	-0.0820333	0.771327	-0.255079	0.358871	-0.0834066	0.767595	-0.0308912	0.912975	-0.0689937	0.806983	0.564719	0.0282844	-0.0589027	0.834825	-0.0687275	0.807715	-0.032249	0.909164	-0.0821923	0.770894
ENSGALG00000030966	ENSGALG00000030966	MAPK13	771145	1:169877:184131	black	0.182965	0.513956	0.103233	0.71428	0.345479	0.207225	0.00165284	0.995336	0.123249	0.661673	0.114324	0.684964	0.116982	0.677999	-0.0676119	0.810784	0.0345489	0.902714	-0.081688	0.772266	0.181138	0.518239	-0.403412	0.135937	-0.0728754	0.796329	0.220247	0.430247	0.082066	0.771238	0.027161	0.923453	0.191419	0.494348	-0.267397	0.335306	0.127692	0.650182	0.153934	0.583866	0.0348528	0.901862	0.0287265	0.919054
ENSGALG00000002426	ENSGALG00000002426	EXOSC3	423626	-1:5127362:5131035	black	-0.182448	0.515168	-0.163964	0.559279	-0.00214627	0.993943	-0.0703646	0.803216	-0.0314634	0.911369	-0.489506	0.0640227	-0.133922	0.634193	-0.023741	0.93307	-0.0520817	0.85375	0.147964	0.598708	0.186606	0.505468	0.500122	0.0576279	-0.0740458	0.793122	-0.27045	0.329605	0.202662	0.468832	-0.0296892	0.91635	-0.0463474	0.869718	0.489149	0.0642462	-0.15407	0.58353	0.135122	0.631131	-0.0576685	0.838243	-0.144209	0.608121
ENSGALG00000042553	ENSGALG00000042553	RAP2B	NA	-1:23486507:23490259	black	-0.182312	0.515486	-0.267258	0.335567	0.202817	0.468483	-0.332681	0.225673	0.231565	0.406302	0.06517	0.817509	-0.177367	0.527133	-0.143124	0.61085	0.071269	0.800734	0.0222757	0.937193	0.0407596	0.885323	-0.191066	0.495159	-0.14823	0.598044	0.290551	0.293462	0.325325	0.236729	-0.286688	0.300219	0.401015	0.1385	-0.437973	0.102504	0.0968419	0.731345	0.393256	0.14702	-0.025418	0.928353	0.398398	0.141335
ENSGALG00000029316	ENSGALG00000029316	ARID1A	419542	-1:145665:177912	black	-0.182043	0.516116	-0.206968	0.45923	-0.104747	0.710256	-0.0670999	0.812193	-0.00872706	0.975375	-0.218411	0.434198	-0.129251	0.646168	-0.0278785	0.921437	0.0137395	0.96124	0.174533	0.533858	0.0683242	0.808824	0.673014	0.00596393	-0.078486	0.780988	-0.161059	0.566354	-0.101663	0.718461	-0.0265237	0.925245	-0.0445149	0.874831	0.656436	0.00785974	-0.0979014	0.728508	-0.0614409	0.827803	-0.0692073	0.806396	-0.0656755	0.816116
ENSGALG00000006118	ENSGALG00000006118	ZC3H18	415838	1:18379252:18412636	black	-0.181819	0.516641	-0.411265	0.127767	0.126802	0.652478	-0.20992	0.452707	0.0696786	0.805101	0.204964	0.463686	-0.298853	0.279247	-0.288496	0.297045	0.212297	0.447484	-0.180459	0.519835	-0.0652108	0.817397	0.482866	0.0682742	-0.132523	0.637772	0.197462	0.480553	-0.0498946	0.859834	-0.163977	0.559247	0.390317	0.150336	0.163941	0.559335	-0.150315	0.592846	-0.112935	0.688616	-0.307937	0.264175	0.405983	0.133225
ENSGALG00000008418	ENSGALG00000008418	LARGE2	423200	-1:24137468:24151840	black	-0.181361	0.517716	-0.178658	0.524079	0.0224068	0.936824	-0.183161	0.513498	0.008862	0.974994	-0.02077	0.941432	-0.0581583	0.836886	0.0024849	0.992988	-0.157875	0.574154	0.140796	0.616725	0.0132194	0.962706	0.558471	0.0304787	-0.121788	0.665467	-0.161507	0.56526	-0.115185	0.682706	-0.0983389	0.727337	-0.155421	0.580194	0.628651	0.0120653	-0.00177944	0.994978	-0.183847	0.511895	0.0660234	0.815157	-0.121788	0.665467
ENSGALG00000030732	ENSGALG00000030732	MAPK8IP1	423202	-1:24165051:24178161	black	-0.181146	0.518221	0.0519808	0.854031	0.0669337	0.81265	0.127538	0.650579	-0.173872	0.535433	-0.185156	0.508841	-0.0171494	0.951629	0.100849	0.720632	-0.169342	0.54628	0.376631	0.166441	0.413776	0.125226	0.687484	0.00462243	0.141851	0.614059	0.28942	0.295431	0.107469	0.703037	0.0486691	0.863247	-0.290202	0.29407	0.648423	0.00893095	-0.259506	0.350298	0.103504	0.713558	-0.0295113	0.91685	0.1861	0.506645
ENSGALG00000011816	ENSGALG00000011816	ENGASE	430102	-1:9745042:9754319	black	0.180694	0.519283	0.0921077	0.744063	-0.0158431	0.95531	0.228932	0.411809	-0.212146	0.447815	-0.0615434	0.82752	-0.268914	0.332467	0.215403	0.44071	-0.135082	0.631231	-0.262054	0.345418	-0.116229	0.67997	0.0113709	0.967918	0.390048	0.150642	-0.0984744	0.726974	-0.436784	0.103548	-0.12946	0.645631	-0.0729309	0.796176	0.352963	0.196896	-0.385996	0.155303	-0.282214	0.308157	-0.185189	0.508765	-0.26248	0.344606
ENSGALG00000042077	ENSGALG00000042077	HIC1	396164	1:5668833:5673549	black	0.178513	0.524422	0.101566	0.718718	-0.0584764	0.836005	0.16052	0.567672	0.13232	0.63829	-0.451175	0.0914052	0.00215932	0.993906	0.166442	0.553272	0.0401873	0.886924	0.145641	0.604523	0.143096	0.610921	0.268508	0.333225	0.088485	0.753836	-0.300467	0.276533	-0.104539	0.710807	0.050558	0.857988	0.0478642	0.865489	0.539079	0.0381098	-0.0416974	0.882701	0.0754282	0.78934	0.0371704	0.895368	-0.360866	0.186355
ENSGALG00000046607	ENSGALG00000046607	SCNM1	425744	1:251166:252750	black	-0.178157	0.525263	-0.0386211	0.891306	-0.190415	0.496659	-0.14444	0.60754	0.106046	0.706807	-0.0859118	0.760799	0.00785945	0.977823	0.271755	0.327186	-0.198324	0.4786	0.186697	0.505257	0.0412772	0.883876	0.465191	0.0805811	-0.0142124	0.959906	-0.131182	0.641208	-0.228475	0.412768	-0.161193	0.566026	-0.205566	0.462345	0.633077	0.0112991	0.156246	0.578159	-0.152459	0.58752	0.261644	0.3462	-0.204929	0.463764
ENSGALG00000009496	ENSGALG00000009496	NAF1	769997	-1:23323549:23339843	black	-0.177238	0.527437	-0.218671	0.433638	0.239408	0.39013	-0.188417	0.501271	-0.0554185	0.844482	-0.105175	0.709118	-0.108678	0.69984	-0.0101191	0.971449	-0.222537	0.425344	0.0385187	0.891593	0.218243	0.43456	0.337202	0.219044	-0.161348	0.56565	-0.201772	0.470826	0.0457934	0.871263	-0.129011	0.646785	-0.173286	0.536832	0.362483	0.184245	0.0305756	0.913861	0.167067	0.551763	0.0550842	0.84541	-0.109201	0.698457
ENSGALG00000037683	ENSGALG00000037683	NA	NA	NA:NA:NA	black	-0.177103	0.527757	-0.291281	0.292196	-0.0566373	0.841101	-0.145022	0.606078	0.062837	0.823946	-0.0944758	0.737693	-0.194196	0.487986	-0.101589	0.718658	0.0308517	0.913086	0.0929628	0.741761	0.179596	0.521867	0.662569	0.00711012	-0.123582	0.660809	-0.0929691	0.741744	-0.0110814	0.968735	-0.105057	0.709433	0.0738174	0.793748	0.692947	0.00418329	-0.157965	0.573932	-0.0573588	0.839101	-0.0974866	0.729618	-0.0487639	0.862983
ENSGALG00000001762	ENSGALG00000001762	NA	NA	NA:NA:NA	black	-0.174977	0.532804	-0.23834	0.392312	0.161314	0.565731	-0.166417	0.553334	-0.12342	0.66123	-0.464934	0.0807704	-0.171468	0.541178	-0.0739355	0.793424	-0.133685	0.6348	0.36424	0.181969	-0.18682	0.504972	0.286108	0.301242	-0.131337	0.64081	-0.209127	0.454454	-0.188486	0.501112	-0.0879518	0.755277	-0.119891	0.670404	0.330516	0.228893	-0.150254	0.592997	0.222752	0.424886	-0.0761748	0.787298	-0.077393	0.78397
ENSGALG00000037810	ENSGALG00000037810		NA	1:10007773:10030126	black	-0.172458	0.538809	-0.147553	0.599735	0.050611	0.85784	0.0418315	0.882326	-0.209937	0.452668	-0.0588978	0.834838	-0.293263	0.288772	0.0507553	0.857439	-0.217077	0.43708	0.232259	0.404857	0.191014	0.495279	0.493033	0.0618438	0.174546	0.533829	-0.0669616	0.812573	-0.128762	0.647426	-0.135872	0.62922	-0.203468	0.467026	0.778909	0.000621704	-0.129581	0.64532	-0.0821586	0.770986	-0.167969	0.549587	-0.202097	0.470098
ENSGALG00000042577	ENSGALG00000042577	CFAP44	418359	1:84357507:84390333	black	-0.171105	0.542046	-0.0955515	0.734805	-0.103861	0.712609	-0.207462	0.458135	0.00216993	0.993876	-0.169005	0.54709	-0.00550227	0.984473	-0.0196928	0.944465	-0.0602998	0.830958	-0.236913	0.395237	-0.0553444	0.844688	0.28814	0.297668	-0.143141	0.610806	-0.209224	0.454239	0.226938	0.416005	-0.0560761	0.842658	-0.0766575	0.785979	0.119878	0.670437	-0.373355	0.170458	-0.120266	0.669428	0.0787294	0.780324	-0.0387711	0.890886
ENSGALG00000006092	ENSGALG00000006092	ZGPAT	419260	-1:9621257:9628621	black	-0.17102	0.542252	-0.17671	0.528688	0.125469	0.655923	0.0251651	0.929065	-0.107459	0.703065	-0.290396	0.293732	-0.024894	0.929827	-0.182664	0.514662	0.010817	0.96948	0.510762	0.0517	0.214103	0.443539	0.58159	0.0229543	-0.164485	0.558014	-0.102548	0.716102	-0.0184568	0.947946	0.159648	0.569804	-0.126107	0.654274	0.635656	0.0108703	0.154173	0.583276	0.126596	0.653009	-0.13549	0.630193	-0.0769401	0.785207
ENSGALG00000020736	ENSGALG00000020736	PHOSPHO2	424160	-1:18594485:18595219	black	-0.169843	0.545075	-0.224353	0.421478	-0.037076	0.895632	-0.06345	0.822254	-0.0397885	0.888039	-0.283279	0.306256	-0.114594	0.684257	-0.10864	0.699939	0.0516314	0.855002	0.369055	0.175827	-0.0125638	0.964554	0.58253	0.0226818	-0.144178	0.608198	-0.224214	0.421773	-0.146658	0.601975	0.0426748	0.87997	-0.0717659	0.799371	0.628387	0.0121123	-0.130615	0.642661	0.128187	0.648907	-0.104224	0.711645	-0.134468	0.632798
ENSGALG00000010440	ENSGALG00000010440	MKNK1	771961	-1:22150522:22174621	black	-0.169762	0.545271	-0.160218	0.568409	-0.0757522	0.788454	-0.0510579	0.856597	-0.00889034	0.974914	0.12107	0.667335	-0.0476352	0.866128	-0.00940059	0.973475	-0.0341543	0.90382	0.133461	0.635371	-0.0933482	0.740724	0.352476	0.197558	-0.0615935	0.827381	-0.230882	0.407727	-0.260246	0.348878	-0.0128531	0.963739	-0.0621203	0.825926	0.433549	0.106425	0.61185	0.0153483	-0.375415	0.167924	-0.0187085	0.947237	-0.18159	0.517178
ENSGALG00000004721	ENSGALG00000004721	KCNJ12	427662	-1:4843740:4845029	black	-0.168561	0.54816	-0.129057	0.646667	-0.041497	0.883261	0.0321403	0.909469	-0.0922734	0.743616	-0.194733	0.486761	-0.159219	0.570857	0.0928699	0.742011	-0.0927437	0.74235	0.16228	0.563376	0.0690425	0.806849	0.786238	0.000508993	0.118885	0.673028	0.0120069	0.966125	-0.115867	0.680919	-0.0734908	0.794642	-0.121699	0.665698	0.584217	0.0221987	-0.102846	0.715311	-0.10972	0.697086	-0.0885471	0.753668	0.194627	0.487003
ENSGALG00000034458	ENSGALG00000034458	S100A1	100858258	1:3328411:3329269	black	-0.167922	0.5497	-0.39182	0.148634	-0.0873837	0.756814	-0.254215	0.360557	0.262388	0.344781	-0.320164	0.244682	-0.246528	0.375752	-0.154517	0.582425	0.221775	0.426973	-0.0173797	0.95098	0.191338	0.494534	0.59708	0.0187687	-0.238007	0.392993	-0.100605	0.721282	0.140105	0.618472	-0.170995	0.542311	0.390794	0.149795	0.475609	0.0731508	-0.25422	0.360547	0.189884	0.497882	-0.108929	0.699176	0.0605219	0.830344
ENSGALG00000027183	ENSGALG00000027183	CLEC18B	431137	-1:1191643:1196732	black	-0.167873	0.549818	-0.153915	0.583913	-0.0530514	0.851055	0.0180895	0.948981	-0.101566	0.718719	-0.108624	0.699983	-0.191774	0.493534	0.017473	0.950717	-0.0928455	0.742076	0.210814	0.450739	0.257832	0.353526	0.622247	0.0132451	0.0568429	0.840531	0.0270017	0.923901	-0.14454	0.607289	-0.0692121	0.806383	-0.107445	0.703101	0.828992	0.000133247	-0.105324	0.708723	-0.142867	0.611497	-0.118355	0.674412	-0.115134	0.68284
ENSGALG00000002421	ENSGALG00000002421	FAM213A	423625	-1:5107187:5115923	black	-0.166992	0.551945	-0.151265	0.590484	0.0517324	0.854721	-0.328559	0.231828	0.188588	0.500876	0.520739	0.0465598	0.0694948	0.805606	-0.161408	0.565502	0.0497335	0.860283	-0.0426428	0.880059	0.137026	0.626281	-0.362773	0.183868	-0.329647	0.230195	0.110007	0.696329	0.198292	0.478672	-0.0938516	0.73937	0.0933462	0.740729	-0.232373	0.404619	0.162801	0.562107	0.221306	0.427975	0.167438	0.550868	-0.0815395	0.77267
ENSGALG00000039583	ENSGALG00000039583	MITF	395886	1:15882966:15968266	black	-0.166597	0.552899	-0.140677	0.617026	-0.231636	0.406154	0.0133569	0.962318	-0.185575	0.507866	-0.156559	0.577389	0.0176691	0.950165	-0.19462	0.487017	0.136689	0.627138	0.0663641	0.814219	-0.13194	0.639264	0.499646	0.0579044	-0.188444	0.501209	-0.241551	0.385771	-0.166167	0.553938	0.229537	0.410541	-0.164168	0.558782	0.446782	0.0949999	-0.203212	0.467599	-0.257648	0.353883	-0.144775	0.606698	-0.144192	0.608164
ENSGALG00000000227	ENSGALG00000000227	DPYSL2	395155	-1:605206:646892	black	0.165822	0.554772	0.193667	0.489194	-0.0101557	0.971345	0.0682196	0.809112	0.0047377	0.98663	0.136526	0.627554	0.0908579	0.74743	0.0679768	0.80978	0.0153735	0.956634	-0.0978695	0.728593	-0.197659	0.480106	-0.657593	0.00771366	0.104242	0.711597	0.0831772	0.768217	0.0197533	0.944295	0.0121354	0.965762	0.0225169	0.936515	-0.649624	0.00876351	-0.00652599	0.981585	0.143508	0.609884	0.0700059	0.804202	0.0342087	0.903667
ENSGALG00000005579	ENSGALG00000005579	GFER	416547	1:6565542:6570116	black	0.164964	0.556851	0.126563	0.653096	0.227372	0.41509	-0.149986	0.593664	0.0698372	0.804665	-0.056231	0.842228	0.271739	0.327214	-0.0773017	0.78422	-0.0781548	0.781891	0.00102873	0.997097	-0.13002	0.644191	-0.64389	0.00958568	-0.266855	0.336324	-0.0750739	0.790309	0.0537031	0.849244	0.0830269	0.768626	-0.0722574	0.798023	-0.484302	0.0673384	-0.0418473	0.882282	0.232369	0.404628	0.235256	0.398647	-0.172475	0.538769
ENSGALG00000002527	ENSGALG00000002527	TMEM201	419443	1:3422392:3475582	black	0.163431	0.560573	0.357822	0.190371	-0.165645	0.555201	0.286961	0.299739	0.0320132	0.909826	-0.0391721	0.889764	0.199855	0.47514	0.137258	0.625693	0.161594	0.565049	0.10209	0.717322	-0.0950569	0.736133	-0.379337	0.16317	0.236897	0.395269	0.202781	0.468565	0.0799094	0.777107	0.190971	0.495379	0.0635229	0.822053	-0.45472	0.0885764	0.134033	0.633908	0.0477355	0.865848	0.0277934	0.921676	0.123089	0.662087
ENSGALG00000036064	ENSGALG00000036064	PAXIP1	420441	-1:7745717:7797697	black	-0.163171	0.561207	-0.175332	0.531959	-0.0406483	0.885634	-0.0672357	0.811819	-0.17401	0.535105	-0.318563	0.247184	-0.219416	0.432032	0.052454	0.852715	-0.189243	0.499361	0.060304	0.830947	-0.150179	0.593184	0.517976	0.0479436	0.0792268	0.778967	-0.124248	0.659083	-0.18622	0.506366	-0.145534	0.604793	-0.152142	0.588306	0.437225	0.10316	-0.200938	0.472702	-0.224479	0.42121	-0.100779	0.720818	0.0480211	0.865052
ENSGALG00000003841	ENSGALG00000003841	DGKK	422129	-1:1834265:1850149	black	0.162901	0.561862	0.261449	0.346574	0.0494949	0.860947	0.258518	0.352202	0.0737725	0.793871	-0.240316	0.388279	0.0357075	0.899466	0.263886	0.341933	0.00429423	0.987882	0.167449	0.550839	0.155709	0.579484	-0.36976	0.174939	0.282741	0.307216	0.0979119	0.72848	0.0414315	0.883444	0.00514159	0.985491	0.0986992	0.726373	-0.268028	0.334124	0.392863	0.14746	0.296065	0.283975	0.0508633	0.857139	-0.0145982	0.958819
ENSGALG00000039710	ENSGALG00000039710	HDAC7	426885	1:5847783:5910234	black	-0.162557	0.562702	-0.419337	0.119725	0.161828	0.564478	-0.318263	0.247653	0.0326788	0.907958	0.249906	0.369032	-0.268685	0.332893	-0.312075	0.257476	0.0555056	0.84424	-0.126326	0.653707	-0.00591677	0.983304	0.3962	0.143747	-0.218573	0.433847	0.460354	0.0842074	-0.321093	0.24324	-0.237776	0.393466	0.315632	0.251801	0.451623	0.0910444	-0.263134	0.343361	-0.387254	0.153846	-0.239937	0.389052	0.301307	0.275126
ENSGALG00000029812	ENSGALG00000029812	RAB25	100858582	1:1553973:1559757	black	-0.162291	0.563348	-0.195579	0.484832	-0.120862	0.667876	-0.0752231	0.7899	0.0167895	0.952643	-0.181636	0.517069	-0.109095	0.698736	-0.0232168	0.934545	0.0123947	0.965031	0.143216	0.610619	0.0651013	0.817699	0.644397	0.00951069	-0.088884	0.752758	-0.198286	0.478685	-0.0909735	0.747118	-0.0258188	0.927226	-0.0424189	0.880685	0.653423	0.00824997	-0.0716587	0.799665	-0.0960993	0.733336	-0.0429134	0.879303	-0.110466	0.695118
ENSGALG00000010554	ENSGALG00000010554	RMDN2	421465	1:31979443:32020628	black	-0.162076	0.563874	-0.147031	0.601041	0.0650076	0.817957	-0.206404	0.460481	-0.11905	0.672597	0.0197303	0.944359	-0.0523477	0.853011	0.0207261	0.941555	-0.27314	0.324628	-0.162862	0.561959	0.11461	0.684213	0.263172	0.343288	-0.152508	0.587398	-0.278412	0.314997	0.0578176	0.83783	-0.110187	0.695854	-0.320931	0.243491	0.322162	0.241584	-0.255898	0.357277	-0.0233977	0.934036	0.125698	0.65533	-0.21641	0.438524
ENSGALG00000041422	ENSGALG00000041422	EGLN1	768374	1:39805911:39835770	black	-0.161694	0.564805	-0.197869	0.479631	-0.0499526	0.859673	-0.0146452	0.958686	-0.111321	0.692862	-0.0925381	0.742904	-0.0378843	0.893368	-0.180661	0.519362	0.0507015	0.857589	0.242355	0.384143	0.15699	0.576329	0.65679	0.00781478	-0.185122	0.50892	-0.0688536	0.807368	-0.167235	0.551357	0.133431	0.635447	-0.130298	0.643476	0.750988	0.00125163	-0.113444	0.687277	-0.135593	0.629929	-0.128225	0.648809	-0.113427	0.687322
ENSGALG00000010564	ENSGALG00000010564	TBCK	422534	1:38427792:38520485	black	0.161593	0.565052	0.202177	0.469918	-0.0203923	0.942495	0.140449	0.6176	0.00211245	0.994039	-0.153143	0.585826	0.151625	0.589589	0.0141058	0.960207	0.121653	0.665817	-0.102822	0.715373	0.0547797	0.846255	-0.254393	0.36021	0.0617489	0.826952	0.370903	0.173506	0.130795	0.6422	0.121217	0.666953	0.0965066	0.732244	-0.502943	0.0560104	-0.283262	0.306286	0.159857	0.569293	0.0072822	0.979451	0.371985	0.172157
ENSGALG00000009268	ENSGALG00000009268	FGG	395837	-1:20332665:20338478	black	0.160918	0.566699	0.362123	0.184713	-0.503073	0.0559366	0.179649	0.521743	0.0781252	0.781972	-0.235515	0.398114	0.0980743	0.728045	0.574052	0.0252317	-0.100357	0.721944	-0.271411	0.327823	-0.275284	0.320691	0.0814727	0.772851	0.367101	0.178303	-0.304559	0.269722	-0.205718	0.462007	-0.0683494	0.808755	-0.218515	0.433974	0.0449244	0.873688	-0.300778	0.276012	-0.197219	0.481104	0.308147	0.263832	-0.199862	0.475126
ENSGALG00000003302	ENSGALG00000003302	SLC38A8	100857309	1:2527643:2531674	black	-0.16063	0.567402	-0.209603	0.453405	0.088567	0.753614	-0.240683	0.387534	0.0587316	0.835298	0.101173	0.719767	-0.126093	0.654308	-0.0310105	0.91264	-0.152049	0.588538	0.164416	0.55818	0.0172253	0.951415	0.454472	0.088772	-0.0977162	0.729003	-0.0153731	0.956635	-0.046589	0.869044	-0.189988	0.497642	-0.0700308	0.804133	0.529379	0.0424224	-0.198801	0.47752	-0.0265597	0.925144	0.0437962	0.876837	-0.0152468	0.956991
ENSGALG00000028519	ENSGALG00000028519	CCR10	100858200	-1:7819486:7821867	black	-0.160591	0.567499	-0.052256	0.853265	-0.134575	0.632526	-0.124264	0.659042	0.0200852	0.94336	-0.273241	0.324441	-0.0793799	0.77855	0.268429	0.333372	-0.277722	0.316249	-0.0458956	0.870978	0.0201298	0.943234	0.384948	0.156524	0.0610184	0.828971	-0.396357	0.143574	0.0784872	0.780984	-0.195169	0.485765	-0.226157	0.417655	0.366823	0.178657	0.0761118	0.78747	-0.108016	0.701589	0.200587	0.47349	-0.213743	0.444324
ENSGALG00000025440	ENSGALG00000025440	gga-mir-1797	100315998	-1:2279640:2279740	black	0.159544	0.57006	0.513247	0.0503825	-0.0753401	0.789581	0.376548	0.166542	0.033374	0.906008	-0.297667	0.281252	0.335145	0.222045	0.343781	0.209615	-0.0541922	0.847886	0.443454	0.0977879	0.335721	0.221202	-0.312275	0.257155	0.251209	0.366458	0.046218	0.870079	0.243538	0.381754	0.251075	0.366722	-0.237436	0.394162	-0.119752	0.670766	0.326179	0.235429	0.406559	0.132622	0.257028	0.355083	-0.192833	0.491103
ENSGALG00000042430	ENSGALG00000042430	NA	NA	NA:NA:NA	black	-0.159465	0.570253	-0.149186	0.595657	0.0479723	0.865188	-0.130757	0.642298	-0.126771	0.652559	0.0152668	0.956934	-0.0759959	0.787787	-0.0263787	0.925652	-0.0843088	0.765145	-0.174703	0.533454	-0.10045	0.721697	0.373732	0.169993	-0.105564	0.708086	-0.108332	0.700754	-0.207115	0.458905	-0.0468116	0.868423	-0.140973	0.616276	0.32055	0.244083	-0.218307	0.434423	-0.206532	0.460199	-0.0310537	0.912519	-0.0305542	0.913921
ENSGALG00000033681	ENSGALG00000033681	NA	NA	NA:NA:NA	black	-0.158709	0.572107	-0.343733	0.209683	-0.104943	0.709735	-0.143561	0.609749	0.0788747	0.779927	-0.0700028	0.80421	-0.21717	0.436879	-0.143324	0.610347	0.120384	0.66912	0.0312335	0.912014	-0.0343999	0.903131	0.531806	0.0413109	-0.157957	0.573953	-0.26639	0.337199	-0.191942	0.493148	-0.0845889	0.764385	0.172737	0.538143	0.594893	0.0193211	0.145359	0.60523	-0.212277	0.447529	-0.153217	0.585641	-0.165301	0.556034
ENSGALG00000006446	ENSGALG00000006446	NAP1L4	423087	1:13305879:13331820	black	-0.158535	0.572533	-0.265457	0.338958	-0.0207622	0.941454	-0.214237	0.443247	0.0328161	0.907573	0.131521	0.640338	-0.130774	0.642254	-0.0849515	0.763402	0.065394	0.816892	-0.235347	0.398461	-0.153725	0.584384	0.426181	0.113185	-0.172421	0.538898	-0.0792217	0.778981	-0.236209	0.396684	-0.112528	0.689684	0.0800436	0.776742	0.280235	0.311707	-0.167342	0.551099	-0.196473	0.482797	-0.0556896	0.84373	0.0697659	0.804861
ENSGALG00000042006	ENSGALG00000042006	NA	NA	NA:NA:NA	black	-0.157944	0.573985	-0.0349843	0.901493	-0.0697151	0.805	-0.086555	0.759057	0.0582424	0.836653	-0.0299538	0.915607	-0.0195097	0.944981	0.246534	0.375739	-0.255208	0.358619	0.233731	0.401802	0.178352	0.524804	0.672423	0.00602459	0.0726346	0.796989	0.126422	0.65346	-0.188903	0.500147	-0.175125	0.532451	-0.207541	0.457961	0.737009	0.00172016	0.0890762	0.752238	-0.225923	0.418149	0.188147	0.501895	0.0507775	0.857377
ENSGALG00000028648	ENSGALG00000028648	CCDC59	417878	-1:40766561:40772837	black	-0.157734	0.574499	-0.317715	0.248513	0.220879	0.428891	-0.185497	0.508046	-0.221081	0.428458	-0.214782	0.442061	-0.264197	0.341341	-0.163035	0.561538	-0.220955	0.428728	-0.0636066	0.821822	-0.0377168	0.893838	0.279879	0.312348	-0.123608	0.660742	-0.214589	0.44248	-0.133888	0.63428	-0.150284	0.592924	-0.105347	0.708663	0.391859	0.14859	-0.13858	0.622336	-0.18134	0.517764	-0.174863	0.533075	-0.136477	0.627677
ENSGALG00000035616	ENSGALG00000035616	NA	NA	NA:NA:NA	black	-0.157277	0.575622	-0.0903723	0.74874	-0.190253	0.497032	-0.0131085	0.963019	-0.00463748	0.986913	-0.203446	0.467075	0.00135863	0.996166	0.0432577	0.878342	0.00672107	0.981034	0.208705	0.455386	0.0406351	0.885671	0.681417	0.00515207	-0.0608949	0.829313	-0.134514	0.632681	-0.134982	0.631486	0.0517846	0.854576	-0.137763	0.624408	0.638864	0.0103548	-0.045035	0.873379	-0.141282	0.615495	0.023559	0.933582	-0.0579923	0.837346
ENSGALG00000007030	ENSGALG00000007030	LOC416622	416622	1:9114379:9129367	black	0.157225	0.57575	-0.116764	0.67857	-0.0384375	0.89182	0.0575431	0.838591	0.157575	0.574891	-0.211294	0.449684	-0.00794351	0.977585	-0.283251	0.306306	0.415163	0.123839	-0.0998345	0.723339	0.0572628	0.839367	0.165124	0.556465	-0.223987	0.422257	-0.379535	0.162933	0.164437	0.55813	0.225943	0.418108	0.31211	0.25742	0.146574	0.602185	-0.323603	0.239365	0.242168	0.384522	-0.192015	0.492981	-0.22768	0.414441
ENSGALG00000029379	ENSGALG00000029379	BRD1	417731	-1:18927212:18992907	black	-0.157217	0.575769	-0.314562	0.2535	-0.0217402	0.938701	-0.216055	0.439295	0.126835	0.652392	0.0722755	0.797973	-0.106487	0.705639	-0.148862	0.596466	0.0319157	0.9101	-0.0758975	0.788056	0.283045	0.306673	0.464978	0.080738	-0.248906	0.371015	-0.0618356	0.826712	0.093023	0.741599	-0.104901	0.709845	0.111857	0.691452	0.419218	0.119841	0.0764924	0.78643	-0.06606	0.815057	-0.00839126	0.976322	0.0074902	0.978864
ENSGALG00000003690	ENSGALG00000003690	KRT14	408039	-1:7438735:7442565	black	-0.156151	0.578394	-0.222269	0.425917	-0.0697198	0.804987	-0.0667062	0.813277	-0.16396	0.559287	0.0588056	0.835094	-0.209596	0.453418	0.00331463	0.990646	-0.117475	0.67671	-0.012384	0.965061	-0.200193	0.474379	0.656591	0.00784	0.0478708	0.865471	-0.0510719	0.856558	-0.398072	0.141691	-0.120966	0.667605	-0.153309	0.585414	0.569956	0.0265388	-0.177743	0.526242	-0.393446	0.146807	-0.129481	0.645576	0.0911014	0.746774
ENSGALG00000009158	ENSGALG00000009158	CDC42BPA	416746	1:12391368:12550464	black	0.156118	0.578477	0.167279	0.551251	0.326539	0.234882	0.434871	0.105243	-0.504087	0.0553636	0.0321407	0.909468	-0.00206098	0.994184	-0.172492	0.538727	0.00268908	0.992411	0.230152	0.409252	-0.187727	0.502867	-0.321924	0.241953	0.237039	0.394978	0.0997521	0.723559	-0.196777	0.482108	0.334239	0.223375	-0.245936	0.376935	-0.387558	0.153495	0.0453249	0.87257	0.114107	0.685534	-0.378793	0.163824	0.143682	0.609446
ENSGALG00000035965	ENSGALG00000035965	NA	NA	NA:NA:NA	black	-0.154931	0.581402	-0.115695	0.68137	-0.0863202	0.759693	-0.199935	0.474961	0.0939966	0.738981	-0.22487	0.42038	-0.0805223	0.775438	0.199384	0.476203	-0.189427	0.498936	0.201459	0.47153	-0.087991	0.755171	0.480522	0.0698227	-0.0353133	0.900571	-0.271185	0.328241	-0.10824	0.700997	-0.196723	0.48223	-0.179877	0.521206	0.505087	0.0548031	-0.172206	0.539411	0.11137	0.692734	0.196926	0.48177	-0.142392	0.612695
ENSGALG00000039761	ENSGALG00000039761	NA	NA	NA:NA:NA	black	-0.154444	0.582606	-0.177731	0.52627	-0.0796976	0.777684	-0.0848332	0.763723	0.00662163	0.981315	-0.158511	0.572592	-0.1209	0.667777	0.0119117	0.966393	-0.054272	0.847664	0.157291	0.575589	0.090433	0.748576	0.657396	0.00773837	-0.0502997	0.858707	-0.141426	0.615133	-0.0779873	0.782348	-0.0687296	0.807709	-0.0843993	0.7649	0.675993	0.00566527	-0.160119	0.568652	-0.0703222	0.803333	-0.019201	0.94585	-0.0738316	0.793709
ENSGALG00000015939	ENSGALG00000015939	THNSL2	422927	1:85994262:86001997	black	-0.154144	0.583347	-0.131662	0.639975	0.0180128	0.949197	0.00795826	0.977544	-0.390613	0.15	0.147251	0.600491	0.0861643	0.760115	-0.44339	0.0978419	0.112872	0.688782	-0.00157313	0.995561	-0.248527	0.371767	0.153856	0.58406	-0.289023	0.296125	-0.170107	0.544442	-0.121249	0.666868	0.367162	0.178225	-0.268623	0.333011	0.120767	0.668122	-0.247163	0.374483	-0.31525	0.252406	-0.264192	0.341352	-0.127374	0.651002
ENSGALG00000034295	ENSGALG00000034295		NA	-1:67556766:67569292	black	-0.153875	0.584014	-0.354085	0.195377	-0.0449289	0.873675	-0.025572	0.927921	-0.110225	0.695754	-0.0171019	0.951763	-0.362494	0.184231	-0.146793	0.601638	0.0474319	0.866694	0.20186	0.470629	-0.154021	0.583653	0.648007	0.00898959	0.0604127	0.830646	0.00971174	0.972598	-0.382152	0.159813	-0.130058	0.644092	0.105231	0.708969	0.630113	0.011808	-0.0200525	0.943452	-0.269562	0.331257	-0.336585	0.219941	0.121131	0.667176
ENSGALG00000001985	ENSGALG00000001985	PIGQ	770171	1:13900515:13930696	black	-0.152844	0.586565	-0.174001	0.535126	-0.11988	0.670432	-0.0841502	0.765576	0.0161631	0.954408	-0.185121	0.508921	-0.106767	0.704898	0.0141404	0.960109	-0.0341892	0.903722	0.117811	0.675833	0.109906	0.696595	0.628812	0.0120368	-0.0742836	0.792471	-0.172571	0.538538	-0.0881648	0.754701	-0.0540861	0.84818	-0.072162	0.798284	0.686479	0.004707	-0.131188	0.641191	-0.100991	0.720252	-0.00799356	0.977444	-0.133539	0.635172
ENSGALG00000032779	ENSGALG00000032779	NA	NA	NA:NA:NA	black	-0.152513	0.587387	-0.31596	0.251282	0.177377	0.527107	-0.226851	0.416189	-0.0824778	0.770118	-0.00791023	0.977679	-0.205485	0.462527	-0.113464	0.687224	-0.192892	0.490969	-0.055863	0.843249	0.122528	0.663544	0.336862	0.219537	-0.182042	0.516119	-0.25335	0.36225	-0.0412257	0.88402	-0.165275	0.556097	-0.119919	0.670331	0.455264	0.0881472	-0.117493	0.676664	-0.00299235	0.991555	-0.0431619	0.878609	-0.186203	0.506404
ENSGALG00000023497	ENSGALG00000023497	NA	NA	NA:NA:NA	black	0.151943	0.5888	0.107588	0.702724	-0.130976	0.641734	0.263367	0.342918	-0.144515	0.607351	-0.528985	0.0426049	-0.278037	0.315677	0.322508	0.24105	-0.157116	0.57602	-0.0584701	0.836023	-0.182103	0.515975	0.1879	0.502468	0.469789	0.0772377	-0.343247	0.210372	-0.20141	0.471641	-0.139907	0.618973	-0.0684303	0.808532	0.293899	0.287679	-0.233745	0.401772	-0.131251	0.641031	-0.13656	0.627468	-0.206426	0.460434
ENSGALG00000032660	ENSGALG00000032660	IFNGR2	418502	1:106645075:106653536	black	-0.149984	0.593669	-0.150953	0.591259	-0.102639	0.71586	-0.11489	0.683479	0.0401826	0.886937	-0.17516	0.532368	-0.0534212	0.850027	0.0354302	0.900243	-0.0588552	0.834956	0.141673	0.614508	0.0530501	0.851058	0.639516	0.0102523	-0.0986906	0.726396	-0.168789	0.54761	-0.10901	0.69896	-0.0520055	0.853962	-0.104977	0.709644	0.659648	0.00745969	-0.121118	0.66721	-0.107892	0.701918	0.0517219	0.85475	-0.103014	0.714862
ENSGALG00000016816	ENSGALG00000016816	CDC16	418735	-1:138283945:138303644	black	-0.149716	0.594337	-0.0821437	0.771026	0.476164	0.0727692	-0.0644545	0.819482	-0.272795	0.325263	0.411871	0.127151	-0.322848	0.240526	0.0634045	0.82238	-0.459397	0.0849381	0.0176472	0.950227	0.120284	0.66938	-0.307896	0.264241	0.316778	0.24999	0.480918	0.0695598	-0.00131993	0.996275	-0.379853	0.162551	-0.112097	0.690819	-0.17435	0.534296	0.257698	0.353785	-0.0788378	0.780028	-0.142792	0.611688	0.278623	0.314616
ENSGALG00000038228	ENSGALG00000038228	NA	NA	NA:NA:NA	black	-0.148781	0.596668	-0.075232	0.789876	-0.0782985	0.781499	0.00164389	0.995361	-0.0651072	0.817683	-0.301066	0.275529	-0.0694256	0.805796	0.06907	0.806773	-0.0331991	0.906499	0.241963	0.384937	0.0688831	0.807287	0.503294	0.0558114	-0.0234759	0.933816	-0.166873	0.55223	-0.139652	0.619618	0.0189597	0.94653	-0.161113	0.566222	0.597847	0.0185779	-0.189012	0.499895	0.0950313	0.736201	-0.00916992	0.974126	-0.171986	0.539939
ENSGALG00000011019	ENSGALG00000011019	ROR1	395179	1:28332890:28375114	black	-0.148312	0.597839	-0.510198	0.0520024	0.0842269	0.765368	-0.322832	0.240551	0.190695	0.496014	0.256683	0.355751	-0.395906	0.144071	-0.249976	0.368894	0.0741121	0.792941	-0.0491808	0.861822	0.337469	0.218656	0.363723	0.182637	-0.209612	0.453385	0.249756	0.369329	-0.132296	0.638352	-0.347903	0.203842	0.405098	0.134155	0.63823	0.0104551	-0.104341	0.711334	-0.0520655	0.853795	-0.195153	0.485802	0.0253231	0.92862
ENSGALG00000004622	ENSGALG00000004622	SPOUT1	417203	-1:5651404:5657476	black	-0.147749	0.599245	-0.100071	0.722708	-0.147056	0.600979	-0.283076	0.306618	0.122506	0.663602	0.119887	0.670415	0.0744993	0.791881	0.128277	0.648676	-0.189632	0.498464	-0.0553231	0.844747	-0.0104933	0.970393	0.630886	0.0116735	-0.157918	0.574047	0.119646	0.671043	-0.255511	0.358029	-0.170771	0.542847	-0.174298	0.534419	0.621137	0.0134583	-0.241022	0.386846	-0.405761	0.133458	0.27039	0.329717	0.0749789	0.790569
ENSGALG00000016022	ENSGALG00000016022	RUNX1	396152	-1:107358560:107506805	black	0.147614	0.599584	0.348287	0.203311	0.0669177	0.812694	0.0880446	0.755026	-0.226811	0.416272	0.166109	0.554079	0.214195	0.443339	0.191575	0.49399	-0.306114	0.26716	-0.0498376	0.859993	-0.154419	0.582669	-0.534657	0.0400334	0.146597	0.602127	0.162668	0.562432	-0.150416	0.592594	0.0494536	0.861062	-0.433319	0.106631	-0.323091	0.240152	-0.306361	0.266754	-0.0653966	0.816885	0.211066	0.450185	-0.0886168	0.75348
ENSGALG00000039229	ENSGALG00000039229	NA	NA	NA:NA:NA	black	-0.147226	0.600553	0.205428	0.462652	0.0610873	0.828781	0.0408508	0.885068	0.0730636	0.795813	-0.030937	0.912847	0.425039	0.114259	0.0247191	0.930319	0.0101138	0.971463	0.6419	0.00988461	0.359965	0.187539	0.0956352	0.734581	-0.178913	0.523478	0.400049	0.139543	0.257823	0.353543	0.272739	0.325367	-0.229151	0.411349	-0.0600698	0.831595	0.383723	0.15796	0.426356	0.113021	0.277044	0.31748	0.270042	0.330365
ENSGALG00000024172	ENSGALG00000024172	THOC3	416232	1:11143957:11147476	black	0.147204	0.600608	0.108296	0.700849	0.158313	0.573077	-0.0438791	0.876606	0.120301	0.669335	-0.00436372	0.987686	0.124765	0.657743	0.0251104	0.929218	-0.141753	0.614307	-0.0129209	0.963547	0.24857	0.371682	-0.429411	0.110186	-0.0478092	0.865643	0.0978489	0.728648	0.20416	0.465479	-0.0503961	0.858438	0.0429384	0.879233	-0.203368	0.467251	0.254308	0.360376	0.040715	0.885448	0.168429	0.548478	-0.102414	0.71646
ENSGALG00000014412	ENSGALG00000014412	CSTA	418268	-1:77439994:77445026	black	-0.146158	0.603228	-0.228656	0.412389	-0.11045	0.69516	0.0258068	0.92726	0.0121287	0.965781	0.0415415	0.883137	-0.0914719	0.745775	-0.164686	0.557527	0.17479	0.533248	0.108946	0.699131	0.025155	0.929093	0.38219	0.159767	-0.10979	0.6969	-0.265963	0.338003	-0.093449	0.740453	0.0925128	0.742972	0.116278	0.679841	0.368045	0.177104	0.592204	0.0200174	-0.245222	0.378368	-0.17748	0.526864	-0.143029	0.611089
ENSGALG00000021869	ENSGALG00000021869	PODN	424647	1:24907072:24927370	black	-0.145829	0.604051	-0.286452	0.300634	-0.0169803	0.952106	-0.203545	0.466853	-0.127948	0.649522	-0.0407001	0.88549	-0.222392	0.425654	-0.0942783	0.738224	-0.0905651	0.74822	0.0326415	0.908063	-0.278647	0.314573	0.103005	0.714888	-0.14158	0.614743	-0.411779	0.127244	-0.196788	0.482082	-0.126391	0.65354	-0.155405	0.580234	0.182154	0.515856	-0.268751	0.33277	0.132618	0.637528	-0.0641716	0.820263	-0.248572	0.371678
ENSGALG00000014467	ENSGALG00000014467	COPS7A	418283	1:77817350:77820482	black	-0.145447	0.605009	-0.321355	0.242833	0.117978	0.675396	-0.237552	0.393925	0.0204651	0.94229	-0.164011	0.559165	-0.172686	0.538265	-0.179588	0.521885	0.0066562	0.981217	0.152442	0.587562	-0.0162881	0.954056	0.234856	0.399475	-0.258094	0.353021	-0.350024	0.200912	0.0958771	0.733932	-0.0833761	0.767677	-0.0112124	0.968365	0.207148	0.458832	-0.277748	0.316201	0.440533	0.100282	-0.0501265	0.859189	-0.138923	0.621466
ENSGALG00000044836	ENSGALG00000044836	NA	NA	NA:NA:NA	black	-0.144309	0.60787	-0.153176	0.585742	-0.183555	0.512577	0.0114841	0.967599	-0.144394	0.607655	-0.129142	0.646448	-0.205775	0.461881	0.0369365	0.896023	-0.0493045	0.861477	-0.0855781	0.761703	0.0742436	0.792581	0.441992	0.0990309	0.0478275	0.865592	-0.211361	0.449537	-0.137732	0.624487	-0.0602901	0.830985	-0.121039	0.667413	0.540731	0.0374093	-0.208922	0.454906	-0.176115	0.530099	-0.114238	0.685191	-0.199665	0.47557
ENSGALG00000032071	ENSGALG00000032071	NA	NA	NA:NA:NA	black	-0.14397	0.608722	-0.343674	0.209767	0.21308	0.445773	-0.131129	0.641344	-0.380577	0.161685	0.162516	0.562802	-0.375262	0.168112	-0.309584	0.261497	-0.189815	0.498041	-0.181376	0.517682	-0.140547	0.617354	-0.0259116	0.926965	-0.0618523	0.826666	-0.350228	0.200632	-0.0783286	0.781417	-0.113153	0.688042	-0.160606	0.567461	0.251368	0.366145	-0.28382	0.305294	-0.20674	0.459737	-0.344555	0.208523	-0.347383	0.204566
ENSGALG00000041460	ENSGALG00000041460	NA	NA	NA:NA:NA	black	-0.143654	0.609517	-0.332119	0.226508	-0.0326757	0.907967	-0.181043	0.518463	0.160838	0.566894	0.085358	0.7623	-0.199209	0.476599	-0.14743	0.600043	0.112266	0.690374	0.093273	0.740926	-0.0269297	0.924103	0.463981	0.0814771	-0.152828	0.586606	-0.200509	0.473667	-0.134868	0.631778	-0.124468	0.658514	0.223434	0.423433	0.546752	0.0349371	0.240344	0.388224	-0.168259	0.548888	-0.116074	0.680376	-0.130603	0.642694
ENSGALG00000006612	ENSGALG00000006612	ASXL1	428158	1:10158453:10173320	black	0.143377	0.610214	0.277584	0.316499	0.35078	0.199874	0.125875	0.654871	0.0395911	0.888591	-0.00994364	0.971943	0.0253035	0.928675	0.261874	0.345761	-0.272389	0.326013	0.177059	0.527861	0.334847	0.222482	-0.406256	0.132938	0.285051	0.303109	0.194661	0.486924	0.262454	0.344655	-0.125411	0.656071	-0.0732135	0.795402	-0.153181	0.585732	0.138112	0.623523	0.385165	0.156271	0.144594	0.607152	-0.0513985	0.85565
ENSGALG00000015306	ENSGALG00000015306	OSTM1	421773	1:67542264:67553225	black	-0.143118	0.610865	-0.0908222	0.747526	-0.0120838	0.965908	-0.231863	0.405682	0.104443	0.711062	-0.174969	0.532822	0.0242316	0.93169	0.129957	0.644352	-0.167964	0.549598	-0.180797	0.519041	0.206189	0.460959	0.392024	0.148404	-0.174604	0.53369	-0.232774	0.403787	0.144906	0.606369	-0.131058	0.641526	-0.140177	0.61829	0.363899	0.182409	-0.204895	0.46384	0.041143	0.884251	0.241402	0.386073	-0.14916	0.595722
ENSGALG00000031843	ENSGALG00000031843	ARHGAP18	421706	1:58109966:58167330	black	-0.142622	0.612114	-0.305324	0.268459	0.187446	0.50352	-0.155561	0.579848	-0.149119	0.595826	0.0961009	0.733332	-0.200535	0.473608	-0.16329	0.560916	-0.159811	0.569407	-0.030899	0.912953	0.16375	0.559798	0.418727	0.12032	-0.154611	0.582193	-0.102715	0.715659	-0.12725	0.651323	-0.105466	0.708345	-0.134769	0.632031	0.541771	0.0369732	-0.149646	0.594512	-0.099468	0.724318	-0.120905	0.667763	-0.103501	0.713567
ENSGALG00000019077	ENSGALG00000019077	SPATA13	418940	1:178515945:178724914	black	-0.142278	0.612982	-0.165477	0.555608	0.149443	0.595018	-0.101383	0.719207	-0.065987	0.815258	0.213531	0.444787	-0.110507	0.695011	-0.0812185	0.773543	-0.122882	0.662626	0.151769	0.589233	0.0559611	0.842977	0.440052	0.100697	-0.0458038	0.871234	-0.036965	0.895943	-0.0749884	0.790542	-0.0673984	0.811371	-0.134347	0.633108	0.528092	0.0430208	-0.0674036	0.811357	-0.0930021	0.741655	-0.0612048	0.828456	-0.0535942	0.849547
ENSGALG00000031456	ENSGALG00000031456	NA	NA	NA:NA:NA	black	-0.142252	0.613047	-0.222804	0.424774	0.135867	0.629231	-0.143694	0.609415	-0.0869607	0.757958	0.0773768	0.784015	-0.156621	0.577236	-0.0939874	0.739005	-0.190316	0.496887	0.0759368	0.787949	0.487041	0.0655777	0.337104	0.219186	-0.14109	0.61598	0.202236	0.469787	-0.10279	0.715458	-0.13726	0.625686	-0.110732	0.694417	0.736507	0.0017393	-0.190302	0.496919	-0.0616627	0.82719	-0.0383338	0.89211	-0.157087	0.576089
ENSGALG00000040763	ENSGALG00000040763	NA	NA	NA:NA:NA	black	-0.141628	0.614621	0.010806	0.969511	-0.0351325	0.901078	0.0898808	0.750066	-0.331758	0.227044	0.202267	0.469715	-0.302092	0.273816	0.19383	0.488822	-0.2811	0.310152	-0.1775	0.526817	-0.137131	0.626014	0.0567432	0.840808	0.380311	0.162003	-0.168073	0.549335	-0.0796687	0.777763	-0.188182	0.501815	-0.305282	0.268528	0.176828	0.528409	-0.25128	0.366319	-0.188505	0.501067	-0.138109	0.62353	-0.175352	0.531912
ENSGALG00000013041	ENSGALG00000013041	CCT5	420930	-1:78405510:78413636	black	-0.140729	0.616893	-0.349389	0.201787	-0.0918999	0.744622	-0.230583	0.408352	0.202818	0.468481	-0.215772	0.439908	-0.273083	0.324732	-0.0911173	0.746731	0.225313	0.419441	-0.00312971	0.991168	-0.11313	0.688102	0.310121	0.260626	-0.179581	0.521902	-0.202266	0.469718	-0.17436	0.534271	-0.183849	0.511889	0.349887	0.2011	0.339667	0.21548	-0.160467	0.567801	0.182099	0.515984	-0.118193	0.674835	-0.101921	0.717774
ENSGALG00000046486	ENSGALG00000046486		NA	-1:21:1349	black	-0.139624	0.619689	-0.351226	0.199264	-0.242072	0.384717	-0.166786	0.552442	-0.0236723	0.933264	-0.035717	0.899439	-0.174297	0.53442	-0.310523	0.259977	0.22407	0.42208	-0.0181642	0.94877	-0.341292	0.213152	0.368031	0.177121	-0.233305	0.402684	-0.290512	0.29353	-0.155105	0.580974	0.0261388	0.926327	0.127271	0.651268	0.264309	0.341131	-0.252934	0.363065	-0.214116	0.443512	-0.224968	0.420172	-0.0656137	0.816287
ENSGALG00000001558	ENSGALG00000001558	MOV10	419872	1:3545026:3550985	black	-0.138604	0.622275	-0.333847	0.223952	0.145369	0.605207	-0.186822	0.504967	-0.107588	0.702723	0.0795379	0.77812	-0.220294	0.430145	-0.161001	0.566496	-0.126191	0.654056	-0.107885	0.701936	0.0862057	0.760003	0.401076	0.138435	-0.167048	0.551809	-0.18271	0.514554	-0.120311	0.66931	-0.132275	0.638407	-0.0767744	0.78566	0.46854	0.0781361	-0.132877	0.636865	-0.118415	0.674254	-0.117655	0.676239	-0.106613	0.705305
ENSGALG00000035169	ENSGALG00000035169	NA	NA	NA:NA:NA	black	-0.13857	0.622361	-0.245517	0.377776	0.0346634	0.902393	-0.129959	0.644347	-0.104838	0.710015	-0.387162	0.153952	-0.156725	0.57698	-0.17907	0.523107	-0.0326629	0.908003	-2.49e-05	0.99993	-0.0247611	0.930201	0.342102	0.211997	-0.164267	0.558544	-0.272648	0.325535	0.0269705	0.923989	-0.0190084	0.946392	-0.000220744	0.999377	0.368762	0.176196	-0.175104	0.5325	-0.116859	0.678322	-0.151278	0.590452	-0.150724	0.591829
ENSGALG00000038719	ENSGALG00000038719	NA	NA	NA:NA:NA	black	-0.138023	0.623748	-0.141842	0.614082	-0.155811	0.579232	-0.0662983	0.8144	0.0484017	0.863992	-0.162987	0.561653	-0.0413074	0.883791	0.018846	0.94685	0.0132241	0.962693	0.114378	0.684824	0.0447465	0.874184	0.677485	0.00552034	-0.0823127	0.770567	-0.124979	0.657191	-0.140248	0.618109	-0.0107599	0.969641	-0.0451434	0.873077	0.64944	0.00878896	-0.0436325	0.877295	-0.20106	0.472426	0.0101645	0.971321	-0.04929	0.861517
ENSGALG00000012452	ENSGALG00000012452	MIS18BP1	423593	1:58865655:58882817	black	0.137677	0.624627	0.274485	0.322156	-0.0643156	0.819866	0.273045	0.324803	0.0526469	0.852179	0.361375	0.185689	0.153642	0.58459	0.126967	0.652053	0.0991235	0.725239	-0.10537	0.708601	0.216326	0.438707	-0.205749	0.461939	0.237486	0.39406	0.214907	0.441789	0.245431	0.377948	0.127351	0.651061	0.030223	0.914851	-0.374634	0.168882	0.27859	0.314676	0.0358872	0.898963	0.0394439	0.889003	0.192174	0.492615
ENSGALG00000010998	ENSGALG00000010998	EFCAB7	100858847	1:28187203:28212014	black	-0.137041	0.626243	-0.160953	0.566614	-0.0721407	0.798343	-0.0547348	0.846379	-0.0323934	0.908759	-0.133177	0.636098	-0.0743063	0.792409	-0.00935139	0.973614	-0.0287156	0.919085	0.0845798	0.76441	0.0802839	0.776087	0.708234	0.00312807	-0.071533	0.800009	-0.0366156	0.896922	-0.189638	0.498451	-0.0164055	0.953725	-0.0883647	0.754161	0.67558	0.00570598	-0.156461	0.577631	-0.205186	0.463191	-0.0397491	0.88815	0.0162082	0.954281
ENSGALG00000010971	ENSGALG00000010971	CSRNP3	772101	-1:19728602:19787165	black	-0.135679	0.629709	-0.0832548	0.768007	-0.0828902	0.768997	-0.00399582	0.988724	-0.237865	0.393284	-0.288881	0.296372	-0.1373	0.625585	-0.00544626	0.984631	-0.159326	0.570594	0.0633211	0.82261	-0.149299	0.595378	0.272771	0.325308	0.059916	0.83202	-0.197489	0.480491	-0.10215	0.717163	-0.022494	0.936579	-0.210776	0.450823	0.339843	0.215228	-0.18137	0.517694	-0.255373	0.358298	-0.111259	0.693027	-0.143356	0.610265
ENSGALG00000023411	ENSGALG00000023411	CD180	431584	-1:21298598:21307258	black	0.134112	0.633707	0.186782	0.505059	-0.251178	0.36652	0.318069	0.247958	-0.0514219	0.855585	-0.385813	0.155516	0.0203611	0.942583	0.244008	0.380807	0.0151658	0.957219	0.0406415	0.885653	0.0598088	0.832317	0.509147	0.0525694	0.262007	0.345507	-0.294717	0.286277	-0.066146	0.81482	0.140419	0.617676	-0.163074	0.561442	0.46115	0.0836029	-0.184142	0.511206	-0.0960699	0.733415	-0.00870754	0.97543	-0.149889	0.593907
ENSGALG00000006273	ENSGALG00000006273	MYLK2	396356	1:10051629:10058646	black	0.134019	0.633945	0.0884354	0.75397	0.0708027	0.802014	0.0273526	0.922915	0.035257	0.900729	0.253893	0.361187	0.0950068	0.736267	-0.0889004	0.752713	0.113379	0.687448	-0.179158	0.5229	-0.124403	0.658682	-0.470183	0.0769565	0.00710807	0.979942	0.289341	0.29557	0.0539815	0.848471	0.0398373	0.887903	0.170317	0.543938	-0.658884	0.00755335	0.0670102	0.81244	0.0034735	0.990198	-0.0248001	0.930091	0.30549	0.268185
ENSGALG00000014981	ENSGALG00000014981	COX17	770190	1:80938546:80940510	black	-0.129039	0.646713	-0.198275	0.478712	-0.0108747	0.969318	-0.0869517	0.757983	-0.0418251	0.882344	-0.173148	0.53716	-0.112603	0.689488	-0.0287907	0.918874	-0.0709476	0.801616	0.112041	0.690968	0.0926505	0.742601	0.579053	0.0237026	-0.10769	0.702453	-0.213777	0.444251	-0.122996	0.66233	-0.0383538	0.892054	-0.122243	0.664285	0.63637	0.0107539	-0.146464	0.602461	-0.0421751	0.881366	-0.0306905	0.913539	-0.142606	0.612156
ENSGALG00000045829	ENSGALG00000045829	NA	NA	NA:NA:NA	black	-0.129009	0.646791	-0.079357	0.778613	-0.0757081	0.788574	0.154442	0.582611	-0.223185	0.423964	-0.215123	0.441318	-0.107573	0.702761	-0.0473954	0.866796	-0.00205496	0.994201	0.222439	0.425554	0.0831341	0.768335	0.54792	0.0344721	0.0512779	0.855985	-0.257794	0.353601	-0.0808353	0.774586	0.144143	0.608286	-0.213496	0.444863	0.616918	0.0142932	-0.0812864	0.773358	-0.0695962	0.805327	-0.187692	0.502948	-0.206313	0.460684
ENSGALG00000004767	ENSGALG00000004767	ODF2	417213	1:5481438:5500391	black	-0.12855	0.647972	-0.10876	0.699622	-0.148573	0.597188	0.0395335	0.888753	-0.0532738	0.850437	-0.232237	0.404903	0.0226756	0.936068	-0.0868421	0.75828	0.101042	0.720116	0.245609	0.377592	0.0574933	0.838729	0.677236	0.0055443	-0.126551	0.653126	-0.167376	0.551017	-0.109613	0.697369	0.172096	0.539674	-0.116988	0.677983	0.631658	0.0115405	-0.0957039	0.734396	-0.0887678	0.753071	-0.0718116	0.799245	-0.0812514	0.773453
ENSGALG00000036226	ENSGALG00000036226		NA	1:119902097:119930627	black	-0.126406	0.653501	0.00248928	0.992975	-0.215373	0.440776	0.295915	0.28423	-0.367458	0.17785	0.0255234	0.928057	-0.125208	0.656598	0.0245635	0.930757	-0.0348204	0.901952	0.133604	0.635006	0.022324	0.937057	0.470335	0.0768482	0.235236	0.398689	-0.0956297	0.734595	-0.244524	0.379769	0.159381	0.570459	-0.309059	0.262348	0.526123	0.0439486	0.0483407	0.864162	-0.350289	0.200548	-0.246331	0.376147	-0.113127	0.68811
ENSGALG00000014831	ENSGALG00000014831	TRMT11	378793	-1:59770898:59817269	black	-0.126147	0.65417	-0.0633762	0.822458	0.17234	0.539091	-0.159202	0.570897	-0.0770603	0.784879	0.120144	0.669745	0.00675806	0.98093	-0.172755	0.5381	0.00746327	0.97894	0.0328683	0.907427	-0.304101	0.270479	-0.419793	0.119282	-0.124716	0.65787	-0.0128649	0.963705	0.145479	0.60493	0.00146733	0.995859	0.00867747	0.975515	-0.560234	0.0298467	0.0435756	0.877454	0.185878	0.507161	-0.0415826	0.883022	0.0945143	0.73759
ENSGALG00000043675	ENSGALG00000043675	ANTXR2	422580	-1:45202097:45302156	black	-0.125736	0.655233	-0.242603	0.383642	-0.107573	0.702763	0.00395999	0.988825	-0.0658418	0.815658	-0.27318	0.324554	-0.146682	0.601915	-0.274563	0.322012	0.285405	0.302482	0.159896	0.569197	-0.164056	0.559055	0.465077	0.0806648	-0.154067	0.583539	-0.310547	0.259938	-0.0196489	0.944589	0.159475	0.570229	0.110313	0.695522	0.342713	0.211128	-0.287047	0.299587	0.0987738	0.726174	-0.29042	0.29369	-0.0849295	0.763462
ENSGALG00000025667	ENSGALG00000025667	SNORA66	NA	1:70800672:70800799	black	0.12528	0.656412	0.115637	0.68152	-0.0587958	0.835121	0.288732	0.296633	-0.236228	0.396645	-0.426199	0.113168	-0.298442	0.279942	0.307703	0.264556	-0.23304	0.403235	-0.127014	0.651932	-0.106002	0.706924	0.171905	0.540131	0.516799	0.0485425	-0.254784	0.359446	-0.167533	0.550636	-0.14852	0.59732	-0.123625	0.660699	0.284631	0.303854	-0.181213	0.518063	-0.245994	0.376821	-0.178429	0.524621	-0.162919	0.561819
ENSGALG00000003458	ENSGALG00000003458	CCZ1	416433	-1:1408659:1422508	black	-0.124951	0.657263	-0.305765	0.267733	0.105141	0.709209	-0.154378	0.58277	-0.102051	0.717427	0.0550379	0.845538	-0.140612	0.617189	-0.191801	0.493471	-0.0465591	0.869128	-0.0931469	0.741265	0.0357451	0.899361	0.444713	0.0967264	-0.212309	0.447458	-0.185829	0.507273	-0.131814	0.639587	-0.0367449	0.896559	-0.0778236	0.782795	0.405059	0.134195	-0.12814	0.649028	-0.117159	0.677537	-0.11396	0.685921	-0.0457112	0.871493
ENSGALG00000011868	ENSGALG00000011868	SNAPC1	423517	-1:54150986:54159510	black	-0.124924	0.657332	-0.20675	0.459713	-0.00995689	0.971906	-0.0578449	0.837754	-0.00269738	0.992388	-0.379238	0.163289	-0.16164	0.564936	-0.0421406	0.881462	0.0028782	0.991878	0.1935	0.489576	0.0594487	0.833313	0.553841	0.0321854	-0.0755258	0.789073	-0.262885	0.343834	-0.0582436	0.83665	-0.0356058	0.899751	0.00450765	0.98728	0.59902	0.0182889	-0.095939	0.733766	0.0477373	0.865843	-0.0977034	0.729038	-0.150664	0.591978
ENSGALG00000042215	ENSGALG00000042215	FAAP100	100049617	1:9174889:9180847	black	-0.124773	0.657723	-0.148447	0.597501	0.150199	0.593134	-0.107414	0.703184	-0.0802808	0.776096	0.121976	0.664977	-0.094172	0.73851	-0.0880988	0.75488	-0.146807	0.601602	0.146374	0.602687	0.0453052	0.872625	0.402526	0.13688	-0.0631212	0.823162	-0.0922223	0.743754	-0.0477669	0.86576	-0.0530825	0.850968	-0.158212	0.573325	0.534855	0.0399458	-0.124316	0.658908	-0.105048	0.709455	-0.0493357	0.86139	-0.120323	0.669279
ENSGALG00000004928	ENSGALG00000004928		101750781	-1:6873123:6888003	black	-0.123664	0.660596	-0.0927406	0.742359	-0.252397	0.36412	-0.094251	0.738297	0.0568542	0.8405	-0.0618541	0.826661	0.110489	0.695058	-0.00651025	0.981629	0.0738854	0.793561	0.182169	0.51582	-0.178983	0.523312	0.696681	0.00390273	-0.174003	0.535122	-0.0293598	0.917275	-0.343266	0.210344	0.0856549	0.761495	-0.11596	0.680674	0.584947	0.021992	-0.11923	0.672129	-0.307322	0.265179	0.0862031	0.76001	0.0545166	0.846985
ENSGALG00000030821	ENSGALG00000030821	CBLN3	769254	1:12108431:12112972	black	-0.123253	0.661663	-0.286473	0.300598	0.0797113	0.777647	0.0682223	0.809104	-0.131445	0.640533	-0.225307	0.419454	-0.251389	0.366103	-0.231757	0.405901	0.172057	0.539767	0.143253	0.610526	-0.0258421	0.927161	0.569849	0.0265737	-0.0415809	0.883027	-0.282584	0.307496	-0.0426607	0.880009	0.086083	0.760335	0.0944648	0.737723	0.412615	0.126397	-0.0345056	0.902835	0.0756122	0.788836	-0.36239	0.184366	-0.00292051	0.991758
ENSGALG00000035596	ENSGALG00000035596	NT5DC2	415895	-1:1075941:1100520	black	-0.122965	0.662409	-0.225492	0.419062	0.129754	0.644874	-0.0602685	0.831045	-0.226621	0.416675	-0.291894	0.291134	-0.18601	0.506854	-0.147771	0.599191	-0.133205	0.636025	0.107772	0.702236	-0.0792848	0.77881	0.374743	0.168748	-0.0721087	0.79843	-0.175402	0.531792	-0.200358	0.474007	-0.023937	0.932519	-0.119977	0.67018	0.471515	0.0760094	-0.0972097	0.73036	-0.210146	0.452209	-0.197827	0.479726	-0.113698	0.68661
ENSGALG00000043896	ENSGALG00000043896		NA	-1:30992189:31001097	black	0.121446	0.666356	0.175993	0.530388	-0.0137856	0.96111	0.324438	0.238085	-0.259048	0.351181	-0.487813	0.0650876	-0.211927	0.448296	0.303102	0.272136	-0.2473	0.37421	0.0427935	0.879638	-0.0333223	0.906153	0.239088	0.390784	0.497851	0.0589553	-0.149119	0.595827	-0.130617	0.642657	-0.0709718	0.801549	-0.205429	0.46265	0.328258	0.232282	-0.237427	0.394182	-0.139446	0.620141	-0.145427	0.60506	-0.0915776	0.74549
ENSGALG00000043141	ENSGALG00000043141		NA	1:31189212:31192236	black	0.121268	0.666819	-0.0488281	0.862804	0.148822	0.596566	0.222696	0.425005	-0.291543	0.291742	-0.251674	0.365541	-0.353783	0.195785	0.114051	0.685683	-0.218836	0.433281	-0.122809	0.662813	-0.107465	0.703049	0.22489	0.420338	0.38462	0.156908	-0.165101	0.55652	-0.30309	0.272155	-0.145727	0.604309	-0.0804596	0.775609	0.312626	0.256593	-0.126326	0.653708	-0.269413	0.331535	-0.297027	0.282337	-0.0504302	0.858344
ENSGALG00000042924	ENSGALG00000042924	NA	NA	NA:NA:NA	black	-0.120556	0.668672	-0.150497	0.592393	-0.203786	0.466316	-0.0844161	0.764854	0.0629978	0.823502	-0.149046	0.596007	-0.0612815	0.828244	0.0282828	0.920301	0.00494459	0.986047	0.062633	0.82451	0.0678289	0.810186	0.676757	0.00559067	-0.0764034	0.786674	-0.138828	0.621707	-0.0837368	0.766698	-0.0416702	0.882777	-0.0528612	0.851583	0.633402	0.0112442	-0.194806	0.486594	-0.155853	0.57913	0.0285763	0.919476	-0.0451389	0.873089
ENSGALG00000013980	ENSGALG00000013980	SLC2A12	421696	1:56302892:56331660	black	0.120466	0.668907	-0.351367	0.199071	-0.135125	0.631122	-0.178669	0.524054	0.311051	0.259124	-0.0194185	0.945237	-0.247158	0.374493	-0.187586	0.503195	0.29086	0.292925	-0.396964	0.142905	0.00653222	0.981567	0.280938	0.310443	-0.191942	0.493146	-0.207487	0.458081	-0.137835	0.624225	-0.172715	0.538196	0.532661	0.040925	0.33137	0.22762	-0.1688	0.547583	-0.202433	0.469344	-0.156872	0.576619	-0.103421	0.713779
ENSGALG00000004727	ENSGALG00000004727	ULK2	417614	1:6954591:6988531	black	-0.119828	0.670568	-0.380986	0.161198	-0.0973573	0.729964	-0.30572	0.267808	0.155462	0.580093	0.0506565	0.857714	-0.282436	0.30776	-0.199699	0.475493	0.212302	0.447475	-0.158502	0.572615	-0.376	0.16721	0.0997806	0.723483	-0.209344	0.453976	-0.339318	0.215983	-0.122547	0.663495	-0.192551	0.491751	0.313165	0.255728	0.0778758	0.782653	-0.270689	0.32916	0.0649509	0.818113	-0.145039	0.606036	-0.137407	0.625314
ENSGALG00000032558	ENSGALG00000032558	INSC	423067	1:10855015:10936272	black	-0.119771	0.670717	-0.171489	0.541127	-0.203607	0.466715	-0.0352469	0.900757	-0.0537383	0.849146	0.238884	0.3912	-0.118653	0.673633	-0.179506	0.52208	0.104506	0.710896	0.135084	0.631227	-0.119088	0.672498	0.193935	0.488581	-0.0686253	0.807996	-0.199634	0.47564	-0.130252	0.643595	0.0429773	0.879125	-0.0180045	0.94922	0.427941	0.111544	-0.00219143	0.993816	-0.232147	0.405089	-0.153997	0.583711	-0.290991	0.292699
ENSGALG00000011275	ENSGALG00000011275	DEPDC1	424710	-1:29133310:29143643	black	0.118562	0.67387	-0.0998382	0.723329	-0.0795911	0.777975	-0.167214	0.551407	0.123792	0.660265	-0.244196	0.380429	-0.154227	0.583141	0.142661	0.612017	-0.151878	0.58896	-0.33644	0.220152	-0.0468976	0.868184	0.202615	0.468936	0.0027779	0.992161	-0.0742374	0.792598	-0.339361	0.215921	-0.282253	0.308087	0.118082	0.675124	0.486821	0.0657184	-0.337997	0.21789	-0.423436	0.115777	0.0781763	0.781832	-0.1955	0.485011
ENSGALG00000034153	ENSGALG00000034153	NA	NA	NA:NA:NA	black	0.116135	0.680217	-0.038986	0.890285	-0.0390725	0.890042	-0.00370371	0.989548	-0.0212048	0.940208	-0.443181	0.0980189	-0.0276359	0.922119	0.0244238	0.93115	-0.0215551	0.939222	0.210674	0.451045	-0.442828	0.0983187	0.0395338	0.888752	-0.0511281	0.856402	-0.534533	0.0400882	-0.34011	0.214844	0.0401145	0.887127	-0.09485	0.736688	0.183947	0.511661	-0.0834576	0.767456	0.046535	0.869195	0.0054169	0.984714	-0.352556	0.19745
ENSGALG00000030826	ENSGALG00000030826	CLCN7	416656	-1:12684836:12701562	black	-0.115718	0.681309	-0.145171	0.605703	-0.154492	0.582486	-0.0634713	0.822195	0.130742	0.642337	0.0148429	0.958129	-0.161975	0.564119	0.191583	0.493973	-0.032731	0.907812	-0.0189179	0.946647	0.153133	0.58585	0.529962	0.0421536	0.0836631	0.766898	0.175675	0.531143	-0.283515	0.305836	-0.229656	0.410292	0.105193	0.709071	0.514464	0.0497464	0.161447	0.565409	-0.211596	0.449021	0.0378759	0.893392	0.143981	0.608694
ENSGALG00000013911	ENSGALG00000013911	ZC3HAV1	426315	-1:71375201:71400743	black	-0.115494	0.681896	0.0353476	0.900475	-0.210865	0.450626	-0.0501341	0.859168	0.06633	0.814313	-0.230941	0.407603	0.38119	0.160955	-0.05569	0.843729	0.142994	0.611177	0.398689	0.141018	-0.0848966	0.763551	0.434974	0.105151	-0.386079	0.155207	-0.242443	0.383965	-0.192784	0.491217	0.348809	0.202588	-0.25576	0.357545	0.405056	0.134198	0.126154	0.654152	0.0208404	0.941234	0.230824	0.407847	-0.19868	0.477795
ENSGALG00000043052	ENSGALG00000043052	CD1B	425802	-1:2662153:2664893	black	-0.115275	0.682471	0.0087995	0.975171	-0.205648	0.462163	-0.00177847	0.994981	0.19268	0.491455	-0.286001	0.301431	0.000995097	0.997192	0.112735	0.689142	0.0881858	0.754644	-0.0853774	0.762247	0.488276	0.0647949	0.180377	0.520029	-0.0462218	0.870068	-0.314692	0.253294	0.5101	0.0520554	0.00535164	0.984898	0.0921548	0.743936	0.266961	0.336126	0.0935363	0.740218	0.239386	0.390174	0.114854	0.683574	-0.33905	0.216368
ENSGALG00000035096	ENSGALG00000035096	NA	NA	NA:NA:NA	black	-0.112917	0.688661	0.000163502	0.999539	-0.13509	0.631212	0.057496	0.838721	-0.0740937	0.792991	-0.164491	0.557999	0.0349336	0.901635	0.125738	0.655226	-0.0976309	0.729232	0.20514	0.463295	0.0891034	0.752165	0.731655	0.0019332	0.0409721	0.884729	0.0234882	0.933782	-0.204068	0.465685	0.0482761	0.864342	-0.245883	0.377041	0.672458	0.006021	-0.102785	0.715473	-0.219925	0.430937	0.0499944	0.859557	0.0537839	0.84902
ENSGALG00000016959	ENSGALG00000016959	DGKH	769506	1:167542039:167697926	black	-0.112381	0.690073	-0.153757	0.584306	-0.092927	0.741857	0.0546133	0.846717	-0.222443	0.425544	-0.0985534	0.726763	-0.144304	0.607881	-0.0691644	0.806514	-0.0448923	0.873777	0.0544439	0.847187	-0.122022	0.664857	0.639021	0.01033	0.0413215	0.883752	-0.177158	0.527627	-0.200928	0.472724	0.0473426	0.866943	-0.195469	0.485082	0.525093	0.0444394	-0.239123	0.390711	-0.281629	0.309203	-0.186751	0.505131	0.011686	0.96703
ENSGALG00000013528	ENSGALG00000013528	TSPAN33	426128	-1:3902960:3937658	black	0.112145	0.690693	0.196015	0.483839	-0.233544	0.402189	0.0687846	0.807558	0.114517	0.684458	-0.0200458	0.943471	0.213671	0.44448	0.147828	0.59905	0.111106	0.69343	0.194677	0.486887	-0.253433	0.362088	-0.193508	0.489559	0.0298957	0.91577	0.332811	0.225482	-0.431715	0.108081	0.0716252	0.799756	0.0468554	0.868301	-0.15421	0.583184	0.154336	0.582873	-0.140464	0.617563	0.156474	0.577599	0.155856	0.579121
ENSGALG00000033324	ENSGALG00000033324	NA	NA	NA:NA:NA	black	0.112122	0.690753	0.346423	0.205904	0.0526926	0.852052	0.387865	0.153142	-0.23231	0.40475	-0.33697	0.219381	0.372522	0.17149	-0.0301062	0.915179	0.0749167	0.790739	0.625	0.0127275	0.0586712	0.835466	-0.129773	0.644826	0.0175209	0.950583	0.0507858	0.857354	0.0525651	0.852406	0.513037	0.0504929	-0.360711	0.186559	-0.197688	0.48004	0.103465	0.713662	0.423629	0.115594	0.0129743	0.963397	0.0304411	0.914239
ENSGALG00000014980	ENSGALG00000014980		NA	-1:80915820:80927454	black	0.112062	0.690913	0.202049	0.470206	0.153398	0.585194	0.0207161	0.941584	0.0167236	0.952829	0.242972	0.382897	0.198778	0.477572	0.00883503	0.97507	-0.0320785	0.909643	-0.0779931	0.782332	-0.0127228	0.964106	-0.554138	0.032074	0.0110061	0.968947	0.274494	0.322138	0.152193	0.588179	0.0527962	0.851764	-0.00782785	0.977912	-0.635068	0.0109669	0.109698	0.697144	0.114286	0.685065	0.120546	0.668699	0.193327	0.489972
ENSGALG00000003052	ENSGALG00000003052	AGFG1	424793	1:9629184:9664692	black	-0.111771	0.691677	-0.22699	0.415895	-0.345749	0.206847	-0.297402	0.281702	0.336604	0.219913	-0.106773	0.704882	0.00386775	0.989085	0.0351587	0.901004	0.157523	0.575017	-0.142776	0.611728	-0.110716	0.694458	0.6928	0.00419464	-0.243652	0.381525	0.00823862	0.976753	-0.200113	0.47456	-0.152129	0.588339	0.221322	0.427942	0.458694	0.0854785	-0.225898	0.418202	-0.276078	0.31924	0.163648	0.560047	0.178176	0.525219
ENSGALG00000035699	ENSGALG00000035699	MARCHF6	420927	-1:78272433:78316254	black	0.110115	0.696045	-0.0471224	0.867557	-0.031759	0.910539	-0.205077	0.463434	0.303506	0.271464	0.0551631	0.845191	-0.196418	0.482924	0.227307	0.415227	-0.0115513	0.967409	-0.486486	0.0659318	-0.148479	0.597422	-0.217658	0.435823	0.139122	0.62096	-0.0321303	0.909497	0.1856	0.507807	-0.40553	0.133699	0.314698	0.253284	-0.484678	0.0670943	-0.399246	0.140412	0.26864	0.332979	0.139674	0.619563	0.222757	0.424874
ENSGALG00000000004	ENSGALG00000000004	NA	NA	NA:NA:NA	black	-0.108714	0.699744	-0.0947761	0.736887	0.0748102	0.79103	-0.0811241	0.7738	0.00706646	0.98006	0.228657	0.412387	-0.0244727	0.931012	-0.0214555	0.939502	0.00425735	0.987986	0.184735	0.509821	-0.127572	0.650492	0.329617	0.230238	-0.0563057	0.842021	0.101866	0.71792	-0.335302	0.221814	-0.0278061	0.92164	-0.0430715	0.878861	0.388039	0.152942	0.0251533	0.929098	-0.104997	0.709591	-0.0162002	0.954304	0.0360021	0.898641
ENSGALG00000000806	ENSGALG00000000806	LINGO3	420075	1:2069057:2070874	black	0.108249	0.700974	0.144003	0.608637	0.0504405	0.858315	0.0374673	0.894536	-0.11197	0.691154	-0.19269	0.491431	-0.0804026	0.775764	0.360042	0.187437	-0.342154	0.211922	-0.0360702	0.89845	-0.0802282	0.776239	0.0173706	0.951006	0.222587	0.425237	-0.224733	0.420672	-0.289755	0.294848	-0.173837	0.535518	-0.343837	0.209536	0.302407	0.273291	-0.440509	0.100303	0.105437	0.708424	0.171662	0.540714	-0.305486	0.268192
ENSGALG00000037738	ENSGALG00000037738	NA	NA	NA:NA:NA	black	-0.108134	0.701277	-0.252586	0.363748	0.0239524	0.932476	-0.117521	0.676591	-0.129074	0.646623	0.0391122	0.889932	-0.158649	0.572254	-0.118853	0.67311	-0.0942072	0.738415	-0.12638	0.653567	0.0136037	0.961623	0.379293	0.163222	-0.126802	0.652479	-0.265809	0.338294	-0.0886437	0.753407	-0.0583354	0.836396	-0.140292	0.617998	0.377654	0.165199	-0.186061	0.506734	-0.12635	0.653646	-0.0897488	0.750422	-0.126071	0.654366
ENSGALG00000031270	ENSGALG00000031270	CSK	396396	-1:2881824:2885383	black	-0.106892	0.704566	0.0829763	0.768763	-0.217871	0.435362	-0.132475	0.637894	0.186054	0.506751	-0.18666	0.505343	0.243348	0.382138	0.246994	0.374821	-0.111087	0.69348	0.0931496	0.741258	0.0489116	0.862571	0.620942	0.0134961	-0.118418	0.674246	-0.105614	0.707954	0.00200267	0.994348	0.00341138	0.990373	-0.230146	0.409265	0.451707	0.0909772	-0.0798907	0.777158	-0.110301	0.695552	0.3777	0.165143	0.0143019	0.959654
ENSGALG00000016576	ENSGALG00000016576	OFD1	418633	-1:124308474:124337655	black	-0.106617	0.705294	-0.504288	0.0552507	0.0651409	0.81759	-0.139886	0.619027	0.0498142	0.860058	0.114059	0.685662	-0.376574	0.16651	-0.352475	0.197559	0.262517	0.344534	-0.153755	0.58431	0.000148281	0.999582	0.595545	0.019155	-0.13148	0.640442	0.168178	0.549081	-0.145805	0.604114	-0.148289	0.597898	0.446452	0.0952741	0.271436	0.327776	-0.107851	0.702026	-0.14822	0.59807	-0.409755	0.129311	0.43225	0.107596
ENSGALG00000036500	ENSGALG00000036500		NA	1:7058342:7063125	black	-0.105837	0.707361	-0.201903	0.470533	0.200624	0.473408	-0.119834	0.670552	-0.09037	0.748746	0.119762	0.670741	-0.162176	0.56363	-0.0941196	0.73865	-0.218006	0.43507	0.141816	0.614147	0.520136	0.0468596	0.333685	0.224191	-0.101894	0.717846	0.306413	0.266669	-0.136028	0.628821	-0.149595	0.594639	-0.107284	0.703527	0.782386	0.000565943	-0.203307	0.467386	-0.0615565	0.827484	-0.0534771	0.849872	-0.115348	0.682278
ENSGALG00000006246	ENSGALG00000006246	MUL1L	770265	-1:16034406:16038155	black	-0.104236	0.711612	-0.0836313	0.766984	-0.246343	0.376121	-0.00312917	0.991169	0.0321899	0.90933	-0.0732683	0.795252	0.0243928	0.931237	0.0183837	0.948152	0.0955237	0.73488	0.28953	0.295239	-0.180849	0.518919	0.623807	0.0129498	-0.0543976	0.847316	0.0271381	0.923518	-0.446058	0.0956018	0.0631291	0.82314	-0.0463228	0.869787	0.628749	0.012048	0.0453866	0.872398	-0.318116	0.247884	-0.00873675	0.975348	0.02389	0.932651
ENSGALG00000016441	ENSGALG00000016441		NA	-1:96498135:96502627	black	0.10398	0.712294	0.185448	0.508161	0.205784	0.46186	0.0129373	0.963501	0.11202	0.691022	0.071522	0.80004	0.051499	0.85537	0.308905	0.262598	-0.277417	0.316803	-0.0386904	0.891112	0.381321	0.160799	-0.289082	0.296021	0.165562	0.555401	0.208021	0.456897	0.15048	0.592435	-0.196831	0.481984	-0.0743014	0.792423	-0.147733	0.599286	0.201875	0.470596	0.254686	0.359638	0.264579	0.340618	0.0250235	0.929463
ENSGALG00000005180	ENSGALG00000005180		NA	1:11693571:11741165	black	-0.10271	0.715671	-0.286021	0.301395	0.162245	0.563461	-0.165657	0.555172	-0.00277783	0.992161	-0.198916	0.47726	-0.274173	0.322727	0.0217056	0.938798	-0.169985	0.544735	-0.0855183	0.761865	0.0680789	0.809499	0.406767	0.132405	-0.021818	0.938482	-0.228547	0.412618	0.00305379	0.991382	-0.253353	0.362243	0.0134397	0.962085	0.28937	0.295518	-0.0570464	0.839967	0.0874812	0.75655	-0.0535233	0.849744	0.0348622	0.901835
ENSGALG00000040739	ENSGALG00000040739	TXNL4A	420811	1:56166284:56177528	black	0.102655	0.715818	0.0329132	0.907301	0.043711	0.877075	-0.0116722	0.967068	0.164166	0.558787	0.0995379	0.724131	0.036726	0.896613	-0.0274846	0.922544	0.179512	0.522066	0.0309568	0.912791	-0.194019	0.48839	-0.399367	0.140281	0.010403	0.970648	0.215364	0.440794	0.0169678	0.952141	-0.0271353	0.923525	0.276739	0.318035	-0.622374	0.0132209	0.158007	0.57383	0.257269	0.354615	0.0010248	0.997108	0.315854	0.25145
ENSGALG00000043751	ENSGALG00000043751	NA	NA	NA:NA:NA	black	-0.10256	0.716072	-0.0231436	0.934751	0.465663	0.0802332	-0.0100185	0.971732	-0.266396	0.337189	0.354634	0.194637	-0.177306	0.527276	-0.0717109	0.799521	-0.281161	0.310043	0.0039752	0.988782	0.173285	0.536834	-0.525479	0.0442547	0.164348	0.558347	0.342476	0.211465	0.216077	0.439246	-0.162227	0.563506	-0.095621	0.734619	-0.448776	0.0933561	0.197407	0.480678	0.186356	0.506049	-0.147062	0.600964	0.182264	0.515597
ENSGALG00000041193	ENSGALG00000041193	NFYB	NA	1:54631916:54646904	black	-0.102521	0.716176	-0.162207	0.563554	-0.0791081	0.779291	-0.0441573	0.875829	-0.089624	0.750759	-0.136797	0.626865	-0.0792949	0.778782	-0.0576959	0.838167	-0.00344679	0.990273	-0.114082	0.6856	-0.109186	0.698498	0.714747	0.00274882	-0.0384217	0.891864	-0.0858217	0.761043	-0.0858809	0.760883	0.00551803	0.984429	-0.0793786	0.778554	0.369961	0.174686	-0.326792	0.234499	-0.273043	0.324807	-0.0989388	0.725733	0.225563	0.418913
ENSGALG00000003857	ENSGALG00000003857		NA	-1:12132157:12149954	black	0.10241	0.71647	0.255527	0.357998	-0.14995	0.593755	0.0809005	0.774408	0.213834	0.444125	-0.123624	0.660699	0.129664	0.645105	0.232998	0.403322	0.104256	0.711561	-0.0458955	0.870978	-0.0967899	0.731484	-0.206246	0.460834	0.198726	0.477689	0.234568	0.400068	0.185862	0.507196	-0.0331317	0.906688	0.194046	0.488328	-0.480836	0.0696143	0.0118514	0.966563	0.113096	0.68819	0.149035	0.596034	0.312707	0.256463
ENSGALG00000030730	ENSGALG00000030730	NOL6	100858366	-1:7254427:7288141	black	-0.101276	0.719493	-0.141345	0.615336	-0.0171102	0.95174	-0.0332957	0.906228	0.0160432	0.954746	-0.169993	0.544714	-0.0677788	0.810324	0.00149992	0.995767	-0.0089732	0.974681	0.138915	0.621486	0.148801	0.596618	0.676865	0.00558021	-0.0645058	0.819341	-0.0152083	0.957099	-0.167943	0.549648	-0.0147583	0.958368	-0.0341805	0.903746	0.688309	0.00455389	-0.100574	0.721366	-0.114978	0.683248	-0.0352421	0.90077	0.00138075	0.996103
ENSGALG00000016889	ENSGALG00000016889	RAP2A	769797	-1:146713664:146744321	black	-0.100835	0.720668	0.0809942	0.774153	0.207456	0.458148	0.21096	0.450418	-0.470441	0.0767723	0.0666349	0.813473	0.105112	0.709287	-0.301342	0.275067	0.0269548	0.924033	0.106098	0.706671	0.158345	0.572999	-0.201125	0.472282	-0.0436166	0.877339	0.287118	0.299462	0.235433	0.398283	0.358675	0.189241	-0.290115	0.294221	-0.380791	0.16143	-0.236457	0.396173	0.198059	0.4792	-0.257736	0.353711	0.237509	0.394013
ENSGALG00000011859	ENSGALG00000011859	GBE	417972	-1:49156263:49172880	black	-0.100638	0.721195	-0.320365	0.24437	0.0592327	0.833911	-0.321134	0.243175	0.212584	0.446857	0.185999	0.506879	-0.242136	0.384587	-0.084419	0.764846	0.0508881	0.857069	-0.370079	0.174539	-0.00592759	0.983273	0.448131	0.0938853	-0.101799	0.718098	0.282393	0.307838	-0.0710607	0.801306	-0.336434	0.22016	0.368395	0.176661	0.22708	0.415706	-0.336546	0.219998	-0.241345	0.38619	-0.0702149	0.803628	0.38289	0.158941
ENSGALG00000038026	ENSGALG00000038026	AEBP2	418184	1:64536241:64585951	black	0.0995764	0.724029	0.146068	0.603453	-0.321016	0.243359	-0.0362953	0.897819	0.203351	0.467287	-0.15296	0.586279	0.285621	0.3021	0.202373	0.469478	0.0362258	0.898014	0.26309	0.343443	-0.38164	0.16042	0.409175	0.129908	-0.0854784	0.761973	-0.01666	0.953008	-0.562701	0.0289794	0.0856169	0.761598	-0.118369	0.674376	0.451272	0.091327	-0.0427068	0.87988	-0.352719	0.197228	0.297245	0.281967	-0.0388592	0.890639
ENSGALG00000029671	ENSGALG00000029671	NA	NA	NA:NA:NA	black	0.0982643	0.727537	0.137438	0.625236	-0.0471372	0.867516	0.383861	0.157797	-0.330423	0.229033	-0.399764	0.139851	-0.234585	0.400034	0.222702	0.424993	-0.153463	0.585033	0.030649	0.913655	-0.12293	0.662501	0.222938	0.424489	0.491117	0.0630202	-0.17582	0.530799	-0.250797	0.367271	0.00554122	0.984363	-0.177259	0.527389	0.300243	0.276909	-0.0819129	0.771654	-0.250283	0.368286	-0.258988	0.351297	-0.104744	0.710262
ENSGALG00000016024	ENSGALG00000016024	SETD4	418511	-1:107902287:107912598	black	-0.096884	0.731232	-0.500591	0.0573568	-0.133502	0.635266	-0.15219	0.588188	0.149362	0.59522	0.016359	0.953856	-0.375965	0.167252	-0.366261	0.179375	0.361856	0.185061	-0.0351587	0.901004	-0.00364359	0.989718	0.364547	0.181573	-0.223758	0.422743	-0.213218	0.445472	-0.202885	0.468331	-0.096234	0.732974	0.501518	0.0568231	0.565885	0.0278885	0.0583429	0.836375	-0.160251	0.568329	-0.375841	0.167404	-0.215298	0.440938
ENSGALG00000037034	ENSGALG00000037034	NA	NA	NA:NA:NA	black	-0.0960906	0.733359	0.326367	0.235143	-0.0250479	0.929394	0.39697	0.142898	-0.208705	0.455385	-0.0352433	0.900767	0.200109	0.474569	0.149724	0.594318	-0.0477239	0.86588	0.51676	0.0485627	0.394936	0.145146	0.102846	0.715311	0.286198	0.301082	0.368369	0.176693	0.296537	0.283171	0.279023	0.313892	-0.30913	0.262232	-0.0616069	0.827345	0.370196	0.174392	0.242908	0.383026	0.000769275	0.997829	0.269284	0.331777
ENSGALG00000017268	ENSGALG00000017268	KCTD21	428098	1:194285089:194285891	black	0.095706	0.734391	-0.152492	0.587438	-0.339852	0.215214	0.0444973	0.87488	0.149947	0.593761	-0.332609	0.225781	-0.11747	0.676722	-0.173198	0.537042	0.461454	0.0833726	-0.0751942	0.789979	-0.196947	0.48172	0.337457	0.218672	-0.116211	0.680018	-0.270588	0.329349	-0.153864	0.58404	0.124984	0.657177	0.353053	0.196774	0.303759	0.271045	-0.528268	0.0429385	0.0363801	0.897581	-0.224037	0.42215	-0.136321	0.628075
ENSGALG00000005684	ENSGALG00000005684	FBXL15	428951	1:17811592:17814305	black	0.0950361	0.736188	-0.0759905	0.787802	0.0234522	0.933883	0.0124788	0.964794	0.183949	0.511655	-0.454921	0.0884176	0.0178677	0.949606	-0.0876021	0.756223	0.175726	0.531022	0.0610936	0.828763	0.250798	0.367269	0.238235	0.392527	-0.190595	0.496243	-0.299439	0.278259	0.0776305	0.783322	0.104366	0.711266	0.209661	0.453277	0.415771	0.123234	0.0184598	0.947938	0.149255	0.595487	-0.0255761	0.927909	-0.310278	0.260372
ENSGALG00000015190	ENSGALG00000015190	GTPBP8	418366	-1:84528015:84532502	black	0.0939251	0.739173	0.173393	0.536576	-0.348103	0.203565	-0.111123	0.693384	0.379625	0.162824	-0.358545	0.189412	0.294616	0.286449	0.389447	0.151328	-0.0625076	0.824856	0.0445319	0.874783	-0.00386976	0.98908	0.571682	0.0259818	-0.0786385	0.780572	-0.102509	0.716207	-0.166658	0.552751	-0.0511825	0.856251	-0.0919653	0.744446	0.49617	0.0599514	-0.164243	0.5586	-0.150287	0.592915	0.498063	0.0588303	-0.0311763	0.912175
ENSGALG00000009409	ENSGALG00000009409	MYNN	771218	-1:20107407:20114295	black	-0.0929443	0.741811	-0.268086	0.334016	0.111363	0.692752	-0.135074	0.631252	-0.107755	0.70228	0.0450825	0.873247	-0.173924	0.53531	-0.111228	0.693107	-0.124541	0.658324	-0.105032	0.709498	0.051782	0.854583	0.413043	0.125965	-0.127091	0.651732	-0.190825	0.495714	-0.148263	0.597961	-0.0976356	0.729219	-0.110513	0.694994	0.445463	0.0960982	-0.153381	0.585235	-0.132897	0.636814	-0.0886467	0.753399	-0.0894381	0.751261
ENSGALG00000046411	ENSGALG00000046411		NA	-1:104640895:104658791	black	-0.0929383	0.741827	-0.230401	0.408732	0.0555666	0.844071	-0.222019	0.42645	0.0234581	0.933866	-0.0301186	0.915144	-0.244302	0.380215	0.0840386	0.765879	-0.228968	0.411735	-0.290898	0.29286	0.0192542	0.9457	0.453598	0.0894649	0.00745417	0.978966	-0.230437	0.408656	0.00957472	0.972984	-0.306665	0.266255	-0.0434706	0.877747	0.390809	0.149777	-0.294278	0.287029	-0.154765	0.581813	0.0299493	0.91562	-0.0324808	0.908514
ENSGALG00000007437	ENSGALG00000007437	DPP8	427512	-1:18463290:18484380	black	-0.0928331	0.74211	-0.219465	0.431927	0.221143	0.428324	-0.0473574	0.866902	-0.192778	0.49123	0.0543149	0.847545	-0.306242	0.266949	-0.0391912	0.88971	-0.244017	0.380788	-0.163581	0.560209	0.334768	0.222598	0.260076	0.349203	0.0616202	0.827308	-0.0788841	0.779902	0.063434	0.822298	-0.194555	0.487166	-0.119699	0.670904	0.418233	0.120804	-0.197723	0.47996	-0.00382167	0.989215	-0.157387	0.575353	-0.114752	0.683843
ENSGALG00000011093	ENSGALG00000011093	AK7	428907	1:46651390:46670540	black	0.0924306	0.743193	0.0571553	0.839665	0.331886	0.226853	-0.103267	0.714191	0.19558	0.484828	-0.114392	0.684787	-0.05245	0.852726	0.196349	0.483079	-0.165961	0.554437	-0.0823558	0.77045	0.0918852	0.744662	-0.328527	0.231877	0.120539	0.668716	0.214427	0.442833	0.167555	0.550584	-0.281963	0.308606	0.210558	0.4513	-0.433776	0.106221	0.202107	0.470075	0.294483	0.286677	0.143027	0.611095	0.263024	0.343569
ENSGALG00000009034	ENSGALG00000009034	ALK	421297	1:9091386:9110192	black	-0.0914281	0.745893	-0.106279	0.70619	0.069936	0.804394	-0.0507066	0.857575	-0.22929	0.411058	0.327705	0.233117	-0.0238214	0.932844	-0.000651606	0.998161	-0.267852	0.334453	-0.122099	0.664658	-0.0142981	0.959665	0.45153	0.0911197	-0.0171876	0.951522	0.0622609	0.825537	-0.363895	0.182414	-0.0451298	0.873115	-0.341103	0.213422	0.461274	0.0835087	0.00954789	0.97306	-0.531849	0.0412916	0.00227774	0.993572	0.0546086	0.84673
ENSGALG00000031776	ENSGALG00000031776	NFASC	419824	1:1900570:1977064	black	0.091054	0.746901	-0.160068	0.568778	0.183347	0.513064	0.0389761	0.890312	-0.222379	0.425683	-0.210378	0.451697	-0.345178	0.207648	-0.00189196	0.994661	-0.223209	0.423912	-0.186154	0.506518	-0.0545801	0.846809	0.135841	0.629298	0.169317	0.546341	-0.252301	0.364308	-0.234934	0.399313	-0.185396	0.508281	-0.0536293	0.849449	0.363092	0.183455	-0.265791	0.338327	-0.201605	0.471202	-0.235251	0.398659	-0.212382	0.447299
ENSGALG00000026607	ENSGALG00000026607		NA	-1:11638978:11642570	black	-0.0904176	0.748618	-0.034447	0.902999	-0.0940676	0.73879	0.224263	0.42167	-0.156905	0.576538	0.0238064	0.932886	0.137622	0.624766	-0.193115	0.490458	0.200296	0.474146	0.344802	0.208177	-0.0518816	0.854306	0.377689	0.165157	-0.110595	0.694777	-0.277268	0.317073	-0.162726	0.562289	0.394159	0.14601	-0.151675	0.589465	0.313426	0.255311	0.593206	0.0197556	-0.193822	0.48884	-0.167723	0.550179	-0.150028	0.593561
ENSGALG00000000993	ENSGALG00000000993	GAPVD1	417095	1:9897730:9941204	black	-0.0898712	0.750092	-0.192827	0.491119	0.117401	0.676904	0.0358317	0.899118	-0.201804	0.470754	0.161711	0.564764	0.00216373	0.993894	-0.279409	0.313196	0.0438793	0.876605	0.0822792	0.770658	0.0202229	0.942972	0.356846	0.19167	-0.205305	0.462927	-0.258845	0.351572	-0.142708	0.611899	0.216787	0.437707	-0.170351	0.543855	0.356845	0.191672	0.226304	0.417343	-0.184591	0.510156	-0.184266	0.510916	-0.149788	0.594159
ENSGALG00000027472	ENSGALG00000027472	TMEM38B	427305	1:55185287:55200427	black	-0.089114	0.752136	-0.0388599	0.890638	-0.190041	0.497521	0.171162	0.54191	-0.02857	0.919494	-0.166761	0.552501	-0.0886875	0.753289	-0.0122404	0.965466	0.207179	0.458762	0.00779743	0.977998	0.271156	0.328295	0.595327	0.0192104	0.0847111	0.764054	0.135827	0.629333	0.0153424	0.956721	0.104388	0.71121	0.105363	0.70862	0.483897	0.0676009	-0.196015	0.48384	-0.0790189	0.779534	-0.190615	0.496198	0.121983	0.66496
ENSGALG00000036006	ENSGALG00000036006	NA	NA	NA:NA:NA	black	0.0890679	0.752261	0.156543	0.577428	0.0820559	0.771265	0.0849122	0.763509	0.0311762	0.912175	0.162202	0.563565	0.26695	0.336145	-0.080561	0.775333	0.135097	0.631195	0.220393	0.429933	-0.0587557	0.835232	-0.239128	0.390702	-0.0645666	0.819173	0.452499	0.0903418	-0.0442481	0.875576	0.194705	0.486824	0.0319549	0.909989	-0.480919	0.0695587	0.172769	0.538066	0.140474	0.617539	0.0530512	0.851055	0.42943	0.110169
ENSGALG00000043972	ENSGALG00000043972	NA	NA	NA:NA:NA	black	-0.0877	0.755958	-0.344137	0.209113	0.088435	0.753971	-0.199549	0.47583	0.103189	0.714398	0.307466	0.264944	-0.315512	0.251992	-0.249283	0.370266	0.133891	0.634271	-0.170285	0.544013	0.199906	0.475027	0.18568	0.507621	-0.131106	0.641403	0.222398	0.425641	-0.183774	0.512065	-0.213941	0.443892	0.383728	0.157954	0.554918	0.0317821	-0.163476	0.560464	-0.233715	0.401835	-0.253029	0.362879	-0.106308	0.706114
ENSGALG00000045208	ENSGALG00000045208	NA	NA	NA:NA:NA	black	-0.085791	0.761126	-0.156482	0.577579	0.097943	0.728396	0.0263495	0.925734	-0.252195	0.364517	-0.321803	0.242139	-0.148996	0.596132	-0.130574	0.642766	-0.112217	0.690503	0.0828921	0.768992	0.0161823	0.954354	0.434178	0.105862	-0.0172191	0.951433	-0.0772497	0.784362	-0.144506	0.607373	0.0323899	0.908769	-0.133454	0.635389	0.477094	0.0721328	-0.183511	0.512678	-0.231948	0.405505	-0.214398	0.442895	-0.0316505	0.910844
ENSGALG00000008739	ENSGALG00000008739	MINDY3	420526	1:20283219:20330243	black	-0.0856609	0.761479	-0.0576572	0.838275	0.131804	0.639612	-0.214212	0.443302	0.121725	0.66563	0.161027	0.566432	0.205978	0.461428	-0.205914	0.461572	0.113067	0.688267	0.0621791	0.825764	0.0227165	0.935953	-0.368109	0.177023	-0.339579	0.215606	0.295595	0.284777	0.143423	0.610098	0.0657806	0.815826	0.128743	0.647476	-0.520325	0.0467652	0.236891	0.395281	0.211918	0.448317	0.11768	0.676174	0.25053	0.367799
ENSGALG00000034594	ENSGALG00000034594	NA	NA	NA:NA:NA	black	-0.085286	0.762495	0.0275575	0.922339	-0.264598	0.340582	-0.00453229	0.98721	0.212576	0.446875	-0.51171	0.0511943	-0.0169381	0.952225	0.180075	0.520739	0.0549867	0.84568	-0.00811667	0.977097	0.375616	0.167679	0.33562	0.221349	0.0174897	0.95067	-0.325338	0.236709	0.524497	0.0447251	-0.0353236	0.900542	0.0723614	0.797737	0.28354	0.305792	-0.149058	0.595977	0.29641	0.283388	0.140949	0.616337	-0.212668	0.446674
ENSGALG00000001791	ENSGALG00000001791	LOC415664	415664	1:1073448:1076886	black	-0.0848189	0.763761	0.125741	0.655218	-0.168996	0.547113	0.0369686	0.895933	0.0971091	0.730629	0.0217699	0.938617	0.0678134	0.810229	0.309848	0.261069	-0.149926	0.593814	0.337277	0.218934	0.207112	0.45891	0.437569	0.102858	0.136871	0.626677	0.146085	0.603411	-0.191325	0.494565	-0.0734335	0.794799	-0.203614	0.466699	0.666615	0.00664719	0.0804917	0.775521	-0.0669654	0.812563	0.225564	0.41891	-0.100221	0.722307
ENSGALG00000042101	ENSGALG00000042101	NA	NA	NA:NA:NA	black	-0.0826672	0.769603	-0.247468	0.373876	-0.354287	0.195104	-0.108325	0.700773	0.126295	0.653787	-0.15694	0.576451	-0.107852	0.702024	-0.122178	0.664453	0.233411	0.402465	-0.060718	0.829802	-0.091513	0.745664	0.558667	0.030408	-0.178248	0.525048	-0.240584	0.387735	-0.158737	0.572036	0.00539983	0.984762	0.16966	0.545516	0.534795	0.0399723	-0.22605	0.417882	-0.239588	0.389763	-0.0890622	0.752276	-0.124648	0.658048
ENSGALG00000030853	ENSGALG00000030853		NA	1:45996281:46037126	black	-0.0825742	0.769856	-0.0637998	0.821288	-0.212533	0.446968	0.0370788	0.895624	-0.035605	0.899753	-0.162198	0.563576	0.0341592	0.903806	-0.0372992	0.895007	0.124449	0.658563	0.0577434	0.838036	-0.042578	0.88024	0.505919	0.0543398	-0.112588	0.689527	-0.250022	0.368803	-0.192508	0.491849	0.157819	0.574292	-0.0929442	0.741811	0.530684	0.0418223	-0.112905	0.688693	-0.181079	0.518377	-0.0392865	0.889444	-0.201701	0.470987
ENSGALG00000030598	ENSGALG00000030598	BTAF1	423817	-1:21912396:21954114	black	-0.0820469	0.771289	-0.0693933	0.805885	-0.0752065	0.789946	-0.137465	0.625167	0.0305375	0.913968	-0.339719	0.215405	0.0409983	0.884656	0.0737631	0.793897	-0.154539	0.582372	0.10711	0.703988	-0.00332333	0.990622	0.316969	0.249688	-0.133866	0.634335	-0.125024	0.657075	-0.19814	0.479017	-0.0574482	0.838854	-0.114023	0.685756	0.473898	0.0743361	0.0907344	0.747763	-0.265617	0.338656	0.142108	0.61341	-0.17529	0.532059
ENSGALG00000031606	ENSGALG00000031606	NDC1	772284	-1:25436699:25452503	black	-0.0819948	0.771431	-0.240467	0.387974	0.138718	0.621984	-0.110926	0.693905	-0.169484	0.545939	-0.278199	0.315383	-0.185084	0.509009	-0.145371	0.605201	-0.112002	0.691071	0.0436119	0.877352	-0.123302	0.661535	0.399311	0.140341	-0.101912	0.717798	-0.0931704	0.741202	-0.282995	0.306763	-0.0665615	0.813675	-0.057498	0.838716	0.476272	0.0726949	-0.24798	0.372856	-0.22507	0.419956	-0.175494	0.531574	-0.0398954	0.88774
ENSGALG00000044263	ENSGALG00000044263	DEUP1	419006	-1:187226291:187262877	black	-0.0819409	0.771578	-0.120928	0.667702	0.0158092	0.955406	-0.0114069	0.967816	-0.166236	0.553771	-0.380113	0.16224	-0.181725	0.516863	0.0116094	0.967246	-0.146656	0.601979	0.0271865	0.923382	-0.103676	0.713102	0.38808	0.152894	0.0698906	0.804518	-0.160994	0.566513	-0.136618	0.62732	-0.0786394	0.780569	-0.0960294	0.733523	0.397608	0.142199	-0.178734	0.5239	-0.223162	0.424012	-0.13144	0.640546	-0.0491241	0.86198
ENSGALG00000026019	ENSGALG00000026019	ASCC1	423709	1:12181167:12208613	black	0.0812935	0.773339	0.230854	0.407785	-0.0564151	0.841717	0.0420762	0.881642	0.0891216	0.752116	-0.0693123	0.806107	0.103868	0.712592	0.426842	0.112567	-0.318649	0.247048	0.0945177	0.737581	-0.0392053	0.889671	0.270962	0.328654	0.228685	0.412328	-0.197307	0.480903	-0.142627	0.612101	-0.123558	0.660872	-0.297374	0.28175	0.414221	0.12478	0.0746415	0.791492	-0.176876	0.528294	0.321615	0.24243	-0.206419	0.46045
ENSGALG00000031414	ENSGALG00000031414	NA	NA	NA:NA:NA	black	-0.0811137	0.773828	-0.0555179	0.844206	0.0446401	0.874481	0.0696585	0.805156	-0.281687	0.309101	-0.170813	0.542748	-0.134257	0.633337	-0.0527955	0.851766	-0.0859497	0.760696	-0.0795454	0.778099	-0.00124986	0.996473	0.192171	0.492621	0.0474979	0.86651	-0.0287997	0.918849	-0.232155	0.405074	0.0353549	0.900454	-0.136807	0.626839	0.385233	0.156191	-0.209503	0.453624	-0.287032	0.299613	-0.197546	0.480362	-0.16084	0.56689
ENSGALG00000002528	ENSGALG00000002528	DNAJC18	416189	1:3168035:3179689	black	-0.0808001	0.774682	-0.232436	0.404488	0.148197	0.598128	-0.255236	0.358565	0.0623986	0.825157	0.15719	0.575837	-0.0346165	0.902524	-0.212666	0.446678	-0.0270869	0.923662	-0.00756188	0.978662	0.316772	0.249999	0.0840916	0.765735	-0.361594	0.185403	-0.107118	0.703966	0.0421178	0.881526	-0.0418924	0.882156	-0.027611	0.922188	0.449694	0.0926064	-0.264065	0.341592	0.181873	0.516514	0.0471476	0.867487	-0.344882	0.208064
ENSGALG00000015568	ENSGALG00000015568	SH3TC1	422867	1:80793977:80825261	black	-0.0784385	0.781117	0.124759	0.65776	0.0619901	0.826286	-0.00277847	0.992159	-0.00923295	0.973948	-0.226035	0.417913	0.0316151	0.910943	0.214469	0.442741	-0.247056	0.374697	0.127852	0.649769	0.286983	0.299701	-0.169457	0.546003	0.137122	0.626038	0.151398	0.590153	0.413884	0.125118	-0.121913	0.665143	-0.146434	0.602537	-0.303651	0.271223	0.110379	0.695346	0.347067	0.205005	0.186053	0.506753	0.181259	0.517956
ENSGALG00000009346	ENSGALG00000009346	HN1L	416763	-1:14025385:14035041	black	-0.0783486	0.781362	-0.0994845	0.724274	-0.0953439	0.735362	-0.22142	0.427732	0.0637092	0.821539	0.123122	0.662002	0.0558526	0.843278	0.0449753	0.873546	-0.135657	0.629767	0.0164104	0.953712	-0.288262	0.297455	0.418086	0.120948	-0.140464	0.617562	-0.210895	0.45056	-0.236188	0.396727	-0.0832027	0.768148	-0.196587	0.48254	0.377263	0.165672	-0.145674	0.604441	-0.283243	0.306322	0.182473	0.515109	-0.0712983	0.800653
ENSGALG00000030978	ENSGALG00000030978	NA	NA	NA:NA:NA	black	-0.0782944	0.78151	0.0157214	0.955653	0.182409	0.515257	0.130205	0.643716	-0.306779	0.266069	0.270927	0.328719	-0.300222	0.276944	0.149226	0.59556	-0.319096	0.246349	-0.0254825	0.928172	0.20155	0.471326	0.143602	0.609646	0.372394	0.171649	0.216413	0.438518	-0.215483	0.440535	-0.200462	0.473772	-0.227359	0.415118	0.533543	0.0405289	-0.184989	0.50923	-0.235857	0.397409	-0.183011	0.513848	-0.125431	0.65602
ENSGALG00000026525	ENSGALG00000026525	NA	NA	NA:NA:NA	black	-0.0779038	0.782576	-0.00253081	0.992858	-0.44262	0.0984957	-0.314482	0.253628	0.323656	0.239283	-0.170975	0.542359	0.238468	0.392049	0.212444	0.447163	-0.0270849	0.923667	-0.0982303	0.727628	-0.228965	0.411739	0.34451	0.208588	-0.263673	0.342337	-0.314188	0.254096	-0.0443552	0.875277	-0.0812945	0.773336	-0.109705	0.697125	0.198258	0.47875	-0.174033	0.53505	-0.158015	0.57381	0.470993	0.0763796	-0.125831	0.654986
ENSGALG00000004759	ENSGALG00000004759	DHRS7B	416499	-1:4935123:4946169	black	-0.0776902	0.783159	-0.00980044	0.972347	-0.256614	0.355885	0.0821021	0.771139	0.0174984	0.950646	-0.257792	0.353604	0.0417514	0.88255	0.0859139	0.760793	0.0795204	0.778167	0.159459	0.570267	0.0424447	0.880613	0.77216	0.000742698	0.0180206	0.949175	-0.0137205	0.961293	-0.129243	0.646188	0.0988994	0.725838	-0.0908745	0.747385	0.574696	0.0250307	-0.191826	0.493414	-0.15288	0.586476	0.00973133	0.972542	0.122221	0.664341
ENSGALG00000035174	ENSGALG00000035174	NA	NA	NA:NA:NA	black	-0.0776239	0.78334	-0.299045	0.278924	-0.260447	0.348492	-0.30064	0.276243	0.242247	0.384361	0.280331	0.311534	-0.193838	0.488804	-0.117153	0.677551	0.212728	0.446543	-0.395609	0.1444	-0.28704	0.299599	0.111628	0.692055	-0.180238	0.520355	-0.199372	0.47623	-0.171824	0.540325	-0.214821	0.441976	0.348844	0.202539	0.146343	0.602763	-0.162354	0.563195	-0.30991	0.260968	-0.0435234	0.877599	-0.136454	0.627736
ENSGALG00000044594	ENSGALG00000044594	NA	NA	NA:NA:NA	black	0.0773086	0.784201	0.0638193	0.821235	-0.464131	0.0813658	0.0991597	0.725142	0.16996	0.544795	-0.131951	0.639235	0.0950819	0.736065	0.217654	0.435832	0.154764	0.581814	-0.121548	0.666091	-0.209229	0.454228	0.602796	0.017382	0.0745805	0.791659	-0.189403	0.498992	-0.316928	0.249753	0.0572274	0.839466	0.0243977	0.931223	0.380143	0.162204	0.00276858	0.992187	-0.420647	0.118453	0.114706	0.683963	0.0352172	0.90084
ENSGALG00000035696	ENSGALG00000035696	RRP1B	425237	1:111336046:111358043	black	-0.076787	0.785625	-0.31759	0.248711	-0.149378	0.59518	-0.295136	0.28556	0.18273	0.514507	0.27762	0.316435	-0.244415	0.379989	-0.18516	0.50883	0.183849	0.511888	-0.339834	0.21524	-0.196276	0.483245	0.0494346	0.861115	-0.17792	0.525824	-0.135779	0.629455	-0.112758	0.68908	-0.217732	0.435663	0.342403	0.211569	0.187776	0.502755	-0.290727	0.293157	-0.212744	0.446507	-0.113156	0.688034	-0.165593	0.555326
ENSGALG00000042889	ENSGALG00000042889	NA	NA	NA:NA:NA	black	-0.076492	0.786431	-0.148737	0.59678	0.150851	0.591512	0.0276986	0.921942	-0.21124	0.449804	0.18557	0.507876	-0.249191	0.370449	-0.0444421	0.875034	-0.172164	0.539513	-0.0144762	0.959163	-0.0514344	0.85555	0.412654	0.126357	0.159768	0.569512	-0.114215	0.68525	-0.103483	0.713615	-0.102803	0.715423	-0.152421	0.587615	0.424474	0.114792	-0.144403	0.607632	-0.22312	0.424102	-0.209409	0.453831	-0.0122837	0.965344
ENSGALG00000030545	ENSGALG00000030545	SLC35D3	428614	-1:55006646:55011097	black	-0.076143	0.787385	-0.0124177	0.964966	0.196742	0.482186	0.0960043	0.73359	-0.246758	0.375293	-0.462607	0.0825045	-0.372998	0.1709	0.298259	0.280251	-0.416759	0.122254	0.23416	0.400913	0.0230655	0.934971	0.0240461	0.932212	0.398491	0.141234	-0.29101	0.292666	-0.0363345	0.897709	-0.283816	0.305302	-0.242107	0.384645	0.295167	0.285507	0.000547451	0.998455	0.239582	0.389775	-0.0908075	0.747566	-0.274727	0.321711
ENSGALG00000017395	ENSGALG00000017395		NA	1:18048559:18051063	black	-0.0760758	0.787569	-0.041353	0.883664	-0.128009	0.649365	0.141923	0.613878	-0.143118	0.610865	-0.258948	0.351373	-0.0366814	0.896737	-0.0247926	0.930112	0.0644844	0.8194	0.230569	0.40838	0.0686525	0.807921	0.607995	0.0161905	0.00997938	0.971843	-0.123328	0.661469	-0.173278	0.536851	0.163358	0.560752	-0.16177	0.564619	0.643815	0.00959678	-0.245819	0.377171	-0.0523494	0.853006	-0.131006	0.641659	-0.10868	0.699833
ENSGALG00000012123	ENSGALG00000012123	PAX6	395943	-1:5444151:5461448	black	-0.0759569	0.787894	-0.175537	0.531471	-0.000492984	0.998609	0.128797	0.647336	-0.170368	0.543815	0.199008	0.477054	-0.250052	0.368743	-0.0658168	0.815727	0.0434458	0.877816	-0.0474852	0.866546	0.029101	0.918002	0.640441	0.0101084	0.165755	0.554935	0.15618	0.578324	-0.325173	0.236962	-0.0319037	0.910133	0.025837	0.927175	0.555945	0.0314011	-0.0684825	0.808389	-0.374993	0.168441	-0.312416	0.256928	0.199414	0.476137
ENSGALG00000011809	ENSGALG00000011809	GRIN2B	417965	-1:48468643:48670570	black	-0.0757001	0.788596	0.00094003	0.997347	-0.0158382	0.955324	0.176734	0.528631	-0.188541	0.500983	-0.562832	0.0289341	-0.260042	0.34927	0.185484	0.508076	-0.11345	0.68726	0.265793	0.338324	-0.0316427	0.910866	0.220125	0.430509	0.308583	0.263123	-0.11497	0.68327	-0.100068	0.722715	-0.087968	0.755233	-0.0746399	0.791496	0.272112	0.326525	-0.0646343	0.818986	0.151652	0.589523	-0.173766	0.535687	-0.0513497	0.855785
ENSGALG00000031441	ENSGALG00000031441	NA	NA	NA:NA:NA	black	0.0753579	0.789532	-0.186716	0.505214	0.0185827	0.947592	-0.0262593	0.925988	0.00159276	0.995505	-0.0788594	0.779969	-0.197431	0.480624	-0.0174345	0.950826	-0.03441	0.903103	-0.198606	0.477962	-0.123744	0.660389	0.255321	0.3584	0.0082521	0.976715	-0.442068	0.0989663	-0.154034	0.583619	-0.102702	0.715693	0.0427585	0.879736	0.272887	0.325095	-0.0021603	0.993904	-0.158308	0.57309	-0.101994	0.71758	-0.205581	0.462311
ENSGALG00000035680	ENSGALG00000035680	NA	NA	NA:NA:NA	black	-0.0715323	0.800011	-0.277574	0.316517	-0.0659771	0.815285	-0.162782	0.562152	-0.0389323	0.890435	0.0893402	0.751525	-0.0932264	0.741052	-0.301609	0.274622	0.209783	0.453007	-0.30113	0.275423	-0.191208	0.494834	0.204841	0.46396	-0.306401	0.266689	-0.240609	0.387685	-0.242098	0.384664	0.0661424	0.81483	0.127443	0.650825	0.268037	0.334108	-0.274942	0.321317	-0.283453	0.305946	-0.183714	0.512204	-0.204069	0.465683
ENSGALG00000003135	ENSGALG00000003135	ANK3	396309	1:9421563:9766762	black	0.0711665	0.801015	-0.0763519	0.786814	0.186092	0.506662	-0.270485	0.329541	0.212595	0.446832	-0.0922901	0.743571	0.10947	0.697747	-0.00586804	0.983441	-0.14646	0.60247	-0.00907006	0.974408	0.12396	0.659829	0.0747033	0.791323	-0.31599	0.251235	-0.284855	0.303457	-0.0441791	0.875768	-0.0823831	0.770375	-0.0502345	0.858888	0.420687	0.118415	-0.109981	0.696397	0.0658539	0.815624	0.264668	0.340449	-0.408523	0.13058
ENSGALG00000002450	ENSGALG00000002450	WDR24	416406	-1:13549937:13555202	black	-0.0701046	0.80393	-0.00834993	0.976439	-0.23608	0.39695	0.0480228	0.865047	0.106605	0.705327	-0.101761	0.718199	-0.0146175	0.958764	0.135805	0.62939	0.0558724	0.843223	0.103586	0.713341	-0.124087	0.659499	0.156237	0.578182	0.048936	0.862504	-0.499125	0.0582079	-0.0509247	0.856968	0.0191847	0.945896	0.00204211	0.994237	0.251113	0.366648	0.547524	0.0346293	-0.13745	0.625204	0.0562716	0.842115	-0.379657	0.162786
ENSGALG00000036239	ENSGALG00000036239	NA	NA	NA:NA:NA	black	-0.0698833	0.804538	-0.160777	0.567043	0.466489	0.079627	-0.292135	0.290717	0.122587	0.663389	0.0764856	0.786449	-0.262448	0.344666	0.0664859	0.813883	-0.294472	0.286697	-0.307036	0.265647	0.284745	0.303651	-0.416955	0.122061	0.0392263	0.889612	0.180088	0.520709	0.345157	0.207677	-0.467244	0.079076	0.243866	0.381094	-0.348853	0.202527	0.192068	0.492857	0.223276	0.423769	0.0521315	0.853611	0.119097	0.672474
ENSGALG00000012802	ENSGALG00000012802	F13A1	395420	1:65009436:65078561	black	-0.0690953	0.806704	0.0555278	0.844179	0.371153	0.173194	0.180245	0.52034	-0.488545	0.0646257	0.49371	0.0614319	-0.24382	0.381186	0.00917257	0.974118	-0.340639	0.214085	-0.15155	0.589775	0.10216	0.717136	-0.225028	0.420046	0.410082	0.128976	0.508103	0.0531374	-0.00572371	0.983848	-0.13186	0.639468	-0.261338	0.346785	-0.26707	0.33592	-0.0982428	0.727594	-0.159649	0.569803	-0.280063	0.312017	0.370961	0.173433
ENSGALG00000008105	ENSGALG00000008105	NA	NA	NA:NA:NA	black	-0.0677277	0.810465	0.0912067	0.74649	-0.122234	0.664307	0.0588623	0.834937	-0.055437	0.844431	-0.162872	0.561935	0.148709	0.596847	0.117814	0.675825	-0.103583	0.713348	0.244433	0.379953	0.0317052	0.91069	0.595099	0.0192684	-0.0023596	0.993341	-0.0928212	0.742142	-0.118481	0.674082	0.128214	0.648836	-0.313709	0.25486	0.594179	0.019504	-0.127432	0.650852	-0.17467	0.533532	0.125588	0.655615	-0.0786853	0.780444
ENSGALG00000043599	ENSGALG00000043599	NA	NA	NA:NA:NA	black	0.0669364	0.812643	0.0679628	0.809818	0.0528287	0.851673	0.117132	0.677608	-0.130347	0.643351	0.173719	0.535799	-0.252971	0.362993	0.200858	0.472881	-0.226607	0.416704	-0.204313	0.465138	0.1686	0.548065	0.0659443	0.815376	0.354794	0.194421	0.153692	0.584466	-0.2348	0.399589	-0.223892	0.422457	-0.0532718	0.850442	0.512259	0.0509036	-0.255682	0.357697	-0.344455	0.208664	-0.10886	0.699358	-0.209754	0.453071
ENSGALG00000011468	ENSGALG00000011468	IGFBP5	424220	1:23232312:23248990	black	-0.0661846	0.814713	-0.0915372	0.745599	0.0227826	0.935767	-0.116337	0.679688	0.00117779	0.996676	0.197697	0.48002	0.0076064	0.978536	-0.045554	0.871931	-0.138845	0.621663	0.171341	0.541482	0.0663958	0.814132	0.388492	0.152421	-0.0991736	0.725105	-0.0438931	0.876567	-0.105727	0.707654	-0.0331588	0.906612	-0.187943	0.502368	0.586184	0.0216454	-0.132475	0.637893	-0.172345	0.53908	0.0672973	0.811649	-0.152519	0.587371
ENSGALG00000029528	ENSGALG00000029528	KIRREL1	425302	1:2487750:2508685	black	-0.0649883	0.81801	-0.154633	0.58214	-0.139463	0.620096	-0.0244993	0.930937	-0.200753	0.473118	0.166256	0.553723	-0.1019	0.717828	-0.104539	0.710808	-0.0422136	0.881258	-0.149462	0.594971	-0.189999	0.497617	0.275142	0.320951	-0.049411	0.861181	-0.290599	0.293379	-0.17563	0.531251	0.0323679	0.908831	-0.223477	0.423341	0.241331	0.386218	-0.264852	0.340102	-0.249203	0.370425	-0.104854	0.709972	-0.136898	0.626608
ENSGALG00000015267	ENSGALG00000015267	CMSS1	418381	-1:85718934:85945887	black	0.0646733	0.818879	0.0509964	0.856768	0.240778	0.387341	0.167715	0.5502	-0.212664	0.446683	0.266896	0.336247	-0.127672	0.650234	-0.119464	0.671518	-0.0206382	0.941803	-0.0238459	0.932775	0.0737401	0.79396	-0.60347	0.0172239	0.188478	0.501129	0.239395	0.390157	0.0919018	0.744617	0.00947154	0.973275	0.0600069	0.831769	-0.474854	0.0736717	0.191702	0.493698	0.107386	0.703256	-0.243252	0.382331	0.0656928	0.816068
ENSGALG00000045860	ENSGALG00000045860	NA	NA	NA:NA:NA	black	0.0644142	0.819593	-0.0059255	0.983279	-0.12638	0.653567	0.252289	0.364333	-0.129269	0.646121	-0.27215	0.326454	0.00116379	0.996716	-0.0215473	0.939244	0.149493	0.594892	0.188316	0.501504	-0.101385	0.719201	0.669817	0.00629796	0.076915	0.785276	-0.138023	0.623748	-0.24215	0.384557	0.230346	0.408847	-0.112241	0.690441	0.397157	0.142694	-0.213796	0.444209	-0.0435806	0.877439	-0.173745	0.535737	0.144217	0.6081
ENSGALG00000011421	ENSGALG00000011421	HAL	378924	-1:45710248:45722994	black	-0.0642549	0.820033	-0.177229	0.527458	-0.03968	0.888343	-0.150462	0.592481	0.0045135	0.987263	-0.380701	0.161537	-0.172175	0.539485	-0.0317608	0.910534	-0.0813754	0.773116	-0.122441	0.663771	-0.019872	0.94396	0.257976	0.353249	-0.0758748	0.788118	-0.263684	0.342315	-0.00849591	0.976027	-0.13783	0.624238	0.0587411	0.835272	0.401601	0.137871	-0.22843	0.412863	-0.194091	0.488226	-0.0521128	0.853663	-0.229365	0.4109
ENSGALG00000026727	ENSGALG00000026727	SLC30A10	421349	1:18978772:18984357	black	0.0632542	0.822794	-0.115969	0.680652	-0.136292	0.628148	0.0975607	0.72942	0.0875162	0.756455	-0.199745	0.47539	-0.291675	0.291513	0.112881	0.688757	0.0618936	0.826552	-0.0631736	0.823017	-0.0503812	0.85848	0.426309	0.113065	0.228844	0.411993	-0.265922	0.33808	-0.176783	0.528516	-0.155655	0.579616	0.214009	0.443743	0.516208	0.0488453	0.0125119	0.964701	-0.211488	0.449259	-0.176479	0.529235	-0.156163	0.578366
ENSGALG00000032113	ENSGALG00000032113	NA	NA	NA:NA:NA	black	-0.0628476	0.823917	-0.335071	0.222154	-0.239837	0.389255	-0.30332	0.271772	0.232308	0.404755	-0.243656	0.381517	-0.241255	0.386371	-0.035163	0.900992	0.124143	0.659356	-0.280496	0.311238	-0.152253	0.588031	0.290735	0.293142	-0.212333	0.447406	-0.391046	0.149509	-0.14592	0.603824	-0.242794	0.383257	0.276368	0.318712	0.369721	0.174988	-0.339492	0.215732	-0.0625084	0.824854	0.0021434	0.993951	-0.255739	0.357585
ENSGALG00000013782	ENSGALG00000013782	CDH7	374007	-1:95468521:95545982	black	-0.0608432	0.829456	0.115502	0.681874	-0.267024	0.336006	0.194172	0.48804	-0.277971	0.315797	-0.0653986	0.816879	-0.202716	0.468709	0.287122	0.299455	-0.169173	0.546686	-0.137866	0.624148	-0.125731	0.655246	0.0706894	0.802325	0.382892	0.158938	-0.163158	0.561238	-0.220326	0.430076	-0.0887447	0.753134	-0.278011	0.315724	0.241583	0.385706	-0.278582	0.314691	-0.211774	0.448631	-0.0770533	0.784898	-0.238353	0.392284
ENSGALG00000005046	ENSGALG00000005046	SHMT1	416520	-1:5503923:5511652	black	-0.0605999	0.830128	-0.0469247	0.868108	0.0559764	0.842934	0.0316096	0.910959	-0.131193	0.641179	-0.159233	0.570821	-0.0234657	0.933845	0.0460249	0.870617	-0.168732	0.547747	0.362554	0.184153	0.00855048	0.975873	0.552988	0.0325079	0.00787717	0.977773	-0.0962693	0.73288	-0.287397	0.298972	0.0331554	0.906621	-0.294014	0.287481	0.697962	0.00381001	-0.121973	0.664985	-0.0664321	0.814032	-0.000493919	0.998606	-0.120352	0.669203
ENSGALG00000037047	ENSGALG00000037047	NA	NA	NA:NA:NA	black	-0.0600438	0.831667	0.0774494	0.783816	0.297022	0.282347	0.127759	0.650009	-0.257874	0.353445	0.217085	0.437062	-0.194074	0.488264	0.103169	0.714451	-0.260119	0.349122	-0.256046	0.356989	0.444244	0.0971208	-0.191077	0.495136	0.328254	0.232288	0.474678	0.0737935	0.305811	0.267658	-0.172895	0.537766	-0.0883907	0.75409	-0.260945	0.347538	-0.127667	0.650248	0.104929	0.709773	-0.135074	0.631253	0.328229	0.232326
ENSGALG00000025156	ENSGALG00000025156	gga-mir-1615	100315962	1:7110572:7110664	black	-0.0594199	0.833393	-0.0392223	0.889623	0.0540067	0.848401	0.0558103	0.843395	-0.246962	0.374884	-0.258053	0.353101	-0.410655	0.128389	0.301651	0.274551	-0.325668	0.236207	-0.313716	0.254848	-0.146047	0.603507	0.0879063	0.7554	0.423216	0.115988	-0.197608	0.480222	-0.156558	0.577391	-0.341965	0.212192	-0.111858	0.691448	0.136314	0.628093	-0.219512	0.431825	-0.177488	0.526846	-0.141964	0.613774	-0.0845549	0.764478
ENSGALG00000043174	ENSGALG00000043174	NA	NA	NA:NA:NA	black	0.0591847	0.834044	-0.153369	0.585264	-0.199252	0.476502	0.023269	0.934398	0.000777979	0.997804	-0.116036	0.680477	-0.273855	0.323312	0.0842419	0.765327	0.0445495	0.874734	-0.0789417	0.779745	-0.396056	0.143905	0.329274	0.230753	0.156937	0.576459	-0.427997	0.111492	-0.335758	0.221148	-0.138686	0.622067	0.0505219	0.858088	0.304205	0.270306	-0.241233	0.386417	-0.124747	0.65779	-0.138259	0.623149	-0.154089	0.583483
ENSGALG00000035442	ENSGALG00000035442	NA	NA	NA:NA:NA	black	-0.0591677	0.834091	-0.117881	0.675648	-0.0258012	0.927276	0.102992	0.714921	-0.144456	0.607498	-0.302907	0.272459	-0.243094	0.38265	0.0814436	0.77293	-0.0657979	0.815779	0.173729	0.535774	-0.0220322	0.937879	0.490774	0.0632327	0.154816	0.581688	-0.287004	0.299663	-0.163863	0.559524	-0.0504652	0.858246	-0.129737	0.644917	0.516431	0.0487307	-0.21009	0.45233	0.107465	0.703047	-0.15769	0.574608	-0.132414	0.638049
ENSGALG00000006584	ENSGALG00000006584		NA	1:3388666:3396866	black	-0.0591428	0.83416	-0.112479	0.689814	-0.16722	0.551393	-0.0977176	0.729	0.116797	0.678484	-0.242954	0.382934	-0.0420099	0.881828	0.0813766	0.773113	-0.00238964	0.993256	0.0285503	0.919549	-0.0590018	0.83455	0.568023	0.0271733	-0.0714295	0.800293	-0.261734	0.346029	-0.153471	0.585013	-0.0617872	0.826846	-0.0108387	0.969419	0.571657	0.0259901	-0.12289	0.662604	-0.167702	0.55023	0.0720374	0.798626	-0.141643	0.614583
ENSGALG00000032171	ENSGALG00000032171	NA	NA	NA:NA:NA	black	-0.0579734	0.837399	0.0815492	0.772643	0.196397	0.482971	-0.0371729	0.895361	-0.00150695	0.995747	0.261967	0.345584	-0.0124755	0.964803	0.27734	0.316942	-0.312157	0.257344	0.0511059	0.856464	-0.106988	0.704312	-0.0837027	0.76679	0.263194	0.343246	0.35262	0.197363	-0.0412653	0.883909	-0.259103	0.351075	-0.106589	0.705368	-0.419138	0.119919	0.49117	0.0629874	-0.0484202	0.86394	0.162079	0.563866	0.517612	0.0481284
ENSGALG00000027562	ENSGALG00000027562	PURG	428737	-1:34666884:34667903	black	-0.0577065	0.838138	-0.0991477	0.725174	0.312924	0.256115	-0.254015	0.360948	0.0167948	0.952628	0.34071	0.213984	-0.233339	0.402614	0.0517041	0.8548	-0.267866	0.334428	-0.225105	0.419882	0.00730457	0.979388	-0.640608	0.0100826	0.0843978	0.764904	0.222097	0.426284	0.117627	0.676312	-0.411009	0.128027	0.110473	0.6951	-0.4681	0.078454	0.0525575	0.852427	0.158017	0.573804	0.0393394	0.889296	0.0579348	0.837505
ENSGALG00000042295	ENSGALG00000042295	NA	NA	NA:NA:NA	black	-0.0571449	0.839694	-0.113777	0.686401	-0.100472	0.721638	0.128525	0.648036	-0.0965333	0.732172	-0.313582	0.255063	-0.229892	0.409797	0.0321191	0.909529	0.00943362	0.973382	0.130444	0.6431	0.114397	0.684774	0.617539	0.0141679	0.155464	0.580087	-0.167685	0.550271	-0.0390189	0.890193	-0.0194001	0.945289	-0.0295562	0.916724	0.612544	0.0152005	-0.261168	0.34711	-0.0108872	0.969282	-0.198432	0.478355	-0.0576403	0.838321
ENSGALG00000002503	ENSGALG00000002503	SFTPA2	395308	-1:5196550:5203105	black	0.0563049	0.842023	0.0957562	0.734256	-0.0926783	0.742526	0.261619	0.346248	-0.235849	0.397426	-0.581942	0.022852	-0.317344	0.249097	0.285982	0.301464	-0.20193	0.470472	-0.0424919	0.880481	-0.0686057	0.80805	0.0897088	0.75053	0.474948	0.0736066	-0.396355	0.143575	0.0513129	0.855888	-0.129428	0.645713	-0.137817	0.624271	0.1779	0.52587	-0.267225	0.335629	0.0384431	0.891804	-0.171819	0.540338	-0.246277	0.376254
ENSGALG00000030610	ENSGALG00000030610	NA	NA	NA:NA:NA	black	-0.056176	0.842381	0.012781	0.963942	-0.209838	0.452886	0.0357017	0.899482	-0.00778285	0.978039	-0.101797	0.718104	0.0259719	0.926796	0.165963	0.554432	-0.0660954	0.814959	-0.0167491	0.952757	-0.0663604	0.814229	0.503203	0.0558629	0.0434883	0.877697	-0.333173	0.224947	-0.132223	0.63854	0.0252132	0.928929	-0.204768	0.464123	0.459289	0.0850211	0.0119253	0.966355	-0.234099	0.401039	0.0974535	0.729707	-0.180392	0.519994
ENSGALG00000004782	ENSGALG00000004782	TSEN15	424448	1:8144138:8153180	black	-0.0559928	0.842889	-0.150434	0.592549	-0.19758	0.480286	-0.00573047	0.983829	-0.0131914	0.962785	-0.248755	0.371314	-0.181617	0.517114	0.0583069	0.836475	-0.00945094	0.973333	-0.0356003	0.899766	-0.0309092	0.912925	0.548338	0.0343066	0.0438098	0.876799	-0.280791	0.310708	-0.16279	0.562134	-0.0786902	0.780431	-0.0197387	0.944336	0.581538	0.0229694	-0.200018	0.474774	-0.198649	0.477864	-0.0770204	0.784988	-0.160087	0.568731
ENSGALG00000017418	ENSGALG00000017418	NPTX1	422078	1:9471731:9474194	black	-0.0552492	0.844952	-0.238503	0.391978	-0.278471	0.314891	-0.350685	0.200005	0.466293	0.0797706	0.2757	0.31993	0.11625	0.679917	-0.245143	0.378525	0.461353	0.0834492	-0.0802507	0.776178	-0.192418	0.492054	-0.107941	0.701787	-0.453872	0.0892468	0.182223	0.515695	-0.0767884	0.785622	-0.0276857	0.921979	0.521221	0.0463218	-0.271562	0.327542	0.108203	0.701095	0.0341862	0.90373	0.109444	0.697815	0.196794	0.482068
ENSGALG00000011649	ENSGALG00000011649	ATG9A	425722	1:22223830:22232143	black	-0.0551351	0.845268	-0.000962023	0.997285	-0.0448549	0.873882	-0.078505	0.780936	0.0420526	0.881708	-0.153708	0.584427	0.224329	0.421529	-0.00975626	0.972472	-0.017922	0.949453	0.263546	0.342576	0.173216	0.536999	0.472505	0.0753106	-0.285062	0.30309	-0.0713743	0.800445	-0.15482	0.581676	0.166057	0.554204	-0.253656	0.36165	0.606677	0.0164863	-0.223716	0.422833	0.0779649	0.782409	0.200598	0.473467	-0.182146	0.515875
ENSGALG00000009149	ENSGALG00000009149		NA	1:15401946:15406358	black	0.055122	0.845305	0.0747023	0.791325	-0.128733	0.647501	-0.119569	0.671242	0.31907	0.246389	-0.15793	0.574017	0.299637	0.277926	-0.0885435	0.753678	0.343967	0.209353	-0.0418716	0.882214	-0.319725	0.245366	-0.218931	0.433077	-0.265028	0.339769	-0.107874	0.701964	0.254002	0.360973	0.172224	0.539368	0.278003	0.31574	-0.68236	0.00506675	0.0898043	0.750272	0.244777	0.37926	0.172577	0.538525	0.224394	0.42139
ENSGALG00000001383	ENSGALG00000001383	HTR4	416150	-1:8938645:9038296	black	-0.0538536	0.848826	0.071803	0.799269	-0.119819	0.67059	0.348321	0.203263	-0.250135	0.368579	-0.0131766	0.962826	0.22048	0.429746	-0.233901	0.40145	0.226613	0.416692	0.484734	0.0670582	-0.02198	0.938026	0.3234	0.239678	-0.0824875	0.770092	-0.258815	0.35163	-0.124879	0.657448	0.5469	0.0348779	-0.254322	0.360347	0.3329	0.22535	0.526999	0.0435339	-0.169296	0.546392	-0.20484	0.463964	-0.216125	0.439142
ENSGALG00000032930	ENSGALG00000032930	NCL	396201	-1:15430541:15437975	black	0.0537145	0.849212	-0.104773	0.710186	-0.500142	0.0576163	-0.147848	0.598999	0.255719	0.357624	-0.040758	0.885328	0.0901419	0.749361	-0.0469374	0.868073	0.251793	0.365307	-0.197581	0.480283	-0.245141	0.378529	0.287319	0.299109	-0.24515	0.378513	-0.361996	0.184879	-0.150033	0.593547	0.0505488	0.858013	0.124748	0.657788	0.271506	0.327646	-0.27372	0.32356	-0.274248	0.32259	0.128664	0.647677	-0.234553	0.400101
ENSGALG00000039658	ENSGALG00000039658	GGA1	100857525	-1:51196551:51205052	black	-0.0533414	0.850249	-0.211792	0.448592	-0.10241	0.716469	-0.273341	0.324258	0.313814	0.254693	-0.165237	0.55619	-0.0457062	0.871507	0.0523174	0.853095	0.0191607	0.945964	-0.00693217	0.980439	0.0311787	0.912168	0.578398	0.0238987	-0.204357	0.46504	-0.180681	0.519313	-0.0545282	0.846953	-0.18426	0.510931	0.137147	0.625974	0.526248	0.0438888	-0.183527	0.512642	0.00221356	0.993753	0.171611	0.540835	-0.0345664	0.902665
ENSGALG00000004057	ENSGALG00000004057	HMGCL	396316	-1:5743506:5747633	black	0.0526653	0.852128	-0.00261567	0.992618	-0.363079	0.183471	0.0556616	0.843807	0.0612265	0.828396	-0.25647	0.356165	0.0166904	0.952923	0.0115621	0.967379	0.172653	0.538343	-0.264648	0.340487	0.157008	0.576284	0.450367	0.0920591	-0.0362267	0.898011	0.0812097	0.773567	-0.0783458	0.78137	0.0674073	0.811347	0.110265	0.695648	0.420969	0.118143	-0.481535	0.0691506	-0.323188	0.240003	-0.0295117	0.916849	0.0227823	0.935768
ENSGALG00000003661	ENSGALG00000003661	SETX	417170	-1:6788839:6816609	black	-0.0523917	0.852888	0.0148308	0.958163	0.0456309	0.871717	0.00385633	0.989117	-0.0308123	0.913197	0.522289	0.0457966	0.0274752	0.92257	-0.131013	0.64164	0.0484835	0.863764	-0.322121	0.241647	0.211049	0.450222	-0.335756	0.221151	-0.0236852	0.933227	-0.000472862	0.998666	0.401333	0.138158	0.0494013	0.861208	0.0311056	0.912373	-0.361694	0.185273	0.199408	0.476149	-0.0396917	0.88831	-0.0418192	0.882361	-0.0540151	0.848378
ENSGALG00000039432	ENSGALG00000039432	P2RY13	107049027	1:23681494:23683248	black	0.0519821	0.854027	0.266981	0.336088	0.0132731	0.962555	0.0818985	0.771693	0.0953787	0.735269	0.0665886	0.813601	0.510904	0.0516241	0.0295454	0.916754	0.0327982	0.907623	0.0627463	0.824197	0.179895	0.521164	0.0438166	0.87678	-0.169003	0.547094	0.144571	0.607211	0.305224	0.268624	0.31869	0.246984	-0.18518	0.508785	-0.386472	0.154751	0.383336	0.158415	0.0333183	0.906164	0.3033	0.271807	0.311927	0.257713
ENSGALG00000004319	ENSGALG00000004319	NUDT13	423703	-1:11899306:11907384	black	-0.0518177	0.854484	-0.0833904	0.767639	-0.15959	0.569946	0.0928212	0.742142	-0.00659897	0.981379	-0.400451	0.139108	-0.11423	0.685211	-0.0027816	0.99215	0.106426	0.705801	0.203249	0.467515	0.179419	0.522284	0.589219	0.0208124	0.0181183	0.9489	-0.145968	0.603705	-0.00910658	0.974304	0.0640576	0.820577	0.00726158	0.979509	0.647583	0.00904957	-0.329454	0.230484	0.0976456	0.729192	-0.121179	0.66705	-0.126313	0.65374
ENSGALG00000008616	ENSGALG00000008616	DDR1	417256	1:2195780:2233577	black	-0.0501094	0.859236	-0.192326	0.492266	0.375261	0.168113	-0.111781	0.691652	0.015891	0.955175	0.10364	0.713198	-0.172235	0.539343	-0.225374	0.419311	-0.056707	0.840908	0.234718	0.399759	0.246561	0.375687	-0.268525	0.333193	-0.0656797	0.816105	0.209129	0.454449	0.25624	0.356612	-0.133381	0.635575	0.187868	0.502541	-0.150113	0.593348	0.241622	0.385628	0.328918	0.231288	-0.149917	0.593837	0.106745	0.704954
ENSGALG00000044811	ENSGALG00000044811	LOC100858647	100858647	1:18655953:18660462	black	0.0499775	0.859604	0.0307945	0.913247	-0.218748	0.43347	0.248323	0.372172	-0.0947551	0.736943	-0.219351	0.432173	0.163138	0.561286	-0.247697	0.37342	0.320736	0.243793	0.163819	0.559631	-0.13255	0.637701	0.120006	0.670103	-0.136803	0.62685	-0.388634	0.152258	-0.0952113	0.735718	0.446076	0.0955866	0.0236274	0.93339	0.190835	0.495692	0.406182	0.133016	-0.310903	0.259362	-0.203787	0.466314	-0.33262	0.225764
ENSGALG00000008378	ENSGALG00000008378	SRGAP3	416115	-1:19736835:19803309	black	-0.0499142	0.85978	0.0912841	0.746281	0.387189	0.153921	0.0620615	0.826088	-0.202745	0.468646	0.208755	0.455275	-0.00159247	0.995506	-0.0832861	0.767922	-0.150662	0.591982	0.0629253	0.823703	0.233209	0.402884	-0.575227	0.0248657	0.0771275	0.784696	0.253953	0.36107	0.337065	0.219243	0.0196748	0.944516	-0.0959603	0.733708	-0.525233	0.0443722	0.206843	0.459508	0.324467	0.238041	-0.0757479	0.788465	0.0982739	0.727511
ENSGALG00000033391	ENSGALG00000033391	ISL2	396382	-1:3800164:3803610	black	0.0498016	0.860093	0.156633	0.577208	-0.134227	0.633414	0.3092	0.26212	-0.181394	0.517638	-0.37578	0.167478	0.0136859	0.961391	0.160985	0.566536	-0.0499117	0.859787	0.239651	0.389635	0.0682315	0.809079	0.503894	0.0554726	0.220181	0.430389	-0.253666	0.361632	-0.0921931	0.743833	0.188101	0.502002	-0.291313	0.292139	0.545667	0.0353734	-0.18545	0.508155	-0.0249935	0.929547	-0.0619517	0.826392	-0.186713	0.505219
ENSGALG00000014128	ENSGALG00000014128	A4GALT	418223	-1:68335336:68348032	black	0.0495567	0.860775	-0.0745186	0.791828	0.193913	0.488633	0.0316793	0.910763	-0.185505	0.508028	0.036203	0.898078	-0.20503	0.463538	-0.224078	0.422063	0.07036	0.803229	-0.15813	0.573526	0.0377827	0.893653	-0.325349	0.236693	0.054632	0.846665	0.259848	0.349641	0.143175	0.610721	-0.0277317	0.92185	0.138718	0.621986	-0.33288	0.22538	-0.588992	0.0208737	0.249788	0.369266	-0.295459	0.285009	0.182939	0.514016
ENSGALG00000003590	ENSGALG00000003590	C18H17orf58	417421	1:6987331:6993610	black	0.0494568	0.861053	0.00484318	0.986333	0.451021	0.0915301	0.00688231	0.980579	-0.272386	0.326019	0.244348	0.380124	-0.0378006	0.893603	-0.218328	0.434377	-0.198709	0.47773	-0.0907366	0.747757	0.204577	0.46455	-0.513707	0.0501412	-0.0233394	0.9342	0.254498	0.360004	0.146114	0.603338	0.0139714	0.960586	-0.11536	0.682246	-0.301867	0.274191	-0.089731	0.75047	0.0714548	0.800224	-0.145156	0.605741	0.0108947	0.969261
ENSGALG00000008857	ENSGALG00000008857	PRPF4	417270	-1:1836504:1844590	black	-0.0491278	0.861969	-0.432437	0.107427	-0.0408366	0.885108	-0.326364	0.235148	0.0708827	0.801794	0.279498	0.313036	-0.332238	0.226331	-0.282741	0.307216	0.140228	0.618161	-0.520896	0.0464822	-0.295431	0.285056	-0.000342882	0.999032	-0.232958	0.403404	-0.310541	0.259947	-0.189065	0.499773	-0.234404	0.400408	0.314679	0.253315	0.0990373	0.725469	-0.320824	0.243657	-0.27333	0.324278	-0.208219	0.45646	-0.208578	0.455666
ENSGALG00000002499	ENSGALG00000002499	ZMYM4	419635	-1:4494059:4529122	black	0.0490751	0.862116	0.168382	0.548589	-0.247073	0.374663	0.236421	0.396247	-0.0822874	0.770636	-0.202687	0.468774	0.074971	0.79059	0.163296	0.560903	0.111506	0.692376	-0.109649	0.697273	-0.0864329	0.759387	0.328087	0.232539	0.142894	0.611429	-0.17982	0.521341	-0.180098	0.520685	0.182001	0.516214	-0.118512	0.674001	0.240197	0.388523	-0.176549	0.529069	-0.174553	0.533811	-0.0208152	0.941305	-0.0973891	0.729879
ENSGALG00000033869	ENSGALG00000033869	NA	NA	NA:NA:NA	black	-0.0486401	0.863328	-0.107703	0.702418	0.0406745	0.885561	-0.132453	0.637949	0.0468505	0.868315	0.111596	0.69214	-0.0913921	0.74599	0.0371995	0.895286	-0.122674	0.663165	-0.0562235	0.842249	-0.0519393	0.854146	0.377463	0.16543	-0.00790453	0.977695	-0.16522	0.556232	-0.0476058	0.86621	-0.137842	0.624209	-0.0710793	0.801254	0.401142	0.138364	-0.191912	0.493216	-0.137684	0.624609	0.0428082	0.879597	-0.0828849	0.769012
ENSGALG00000009483	ENSGALG00000009483	MARK1	421342	-1:18746271:18800385	black	-0.0485009	0.863715	-0.173273	0.536863	-0.1718	0.540384	-0.186702	0.505246	0.253657	0.361649	-0.24832	0.372179	0.0901531	0.749331	-0.0918034	0.744882	0.134782	0.631998	0.175338	0.531945	0.0986551	0.726491	0.550652	0.0334022	-0.337867	0.218079	-0.182806	0.514329	-0.124191	0.659231	0.0453761	0.872427	0.099571	0.724043	0.685094	0.00482567	-0.0455899	0.871831	-0.0986855	0.72641	0.121632	0.665872	-0.212272	0.447541
ENSGALG00000011650	ENSGALG00000011650	NIFK	424239	-1:26242390:26246801	black	0.0484668	0.86381	0.116438	0.679422	-0.340095	0.214865	-0.0982469	0.727583	0.287992	0.297928	-0.251745	0.365402	0.28088	0.310548	0.254007	0.360964	-0.0203462	0.942625	0.1154	0.682142	0.0242859	0.931538	0.593898	0.0195766	-0.144732	0.606805	-0.0647244	0.818738	-0.227025	0.415822	0.0268235	0.924402	-0.127697	0.650168	0.625663	0.0126052	-0.184556	0.510238	-0.213215	0.445477	0.398924	0.140762	-0.0965561	0.732111
ENSGALG00000021884	ENSGALG00000021884		420107	-1:3532747:3534622	black	0.048242	0.864437	-0.0636024	0.821833	0.228856	0.411968	0.114387	0.6848	-0.330478	0.228951	-0.0449306	0.873671	-0.335085	0.222133	0.0953487	0.735349	-0.333377	0.224646	-0.174548	0.533825	-0.0734006	0.79489	0.205338	0.462853	0.314172	0.254122	-0.229522	0.410571	-0.229328	0.410978	-0.178331	0.524852	-0.230251	0.409047	0.401039	0.138474	-0.266431	0.337122	-0.260009	0.349331	-0.223832	0.422586	-0.189372	0.499063
ENSGALG00000003987	ENSGALG00000003987	TRAF4	417577	1:5971111:5975016	black	0.0458534	0.871096	-0.0504223	0.858365	0.019506	0.944991	0.151801	0.589153	-0.236597	0.395887	0.215745	0.439966	-0.172444	0.538843	-0.155992	0.578787	0.143697	0.609406	0.00956208	0.97302	-0.523042	0.0454294	-0.512452	0.050801	0.136802	0.626852	-0.11189	0.691365	-0.383548	0.158165	0.0695502	0.805454	0.0858268	0.761029	-0.427972	0.111516	0.290252	0.293982	-0.128267	0.648699	-0.328789	0.231482	-0.0839254	0.766186
ENSGALG00000029172	ENSGALG00000029172	NDUFC2	404751	1:194303527:194307071	black	-0.0450084	0.873453	-0.344188	0.209041	0.0372599	0.895117	-0.345187	0.207635	0.300774	0.276018	0.119303	0.671938	-0.038963	0.890349	-0.326346	0.235175	0.299466	0.278214	-0.192623	0.491584	-0.0979898	0.728271	0.243124	0.382589	-0.446969	0.0948447	-0.0480757	0.8649	-0.130952	0.641797	-0.0519904	0.854004	0.428636	0.110901	0.248143	0.372531	-0.116783	0.678521	-0.131941	0.63926	-0.0572486	0.839407	-0.0212194	0.940167
ENSGALG00000036847	ENSGALG00000036847	PLAC9	423636	1:5866783:5876999	black	0.0447707	0.874117	0.0717493	0.799416	-0.0213771	0.939723	-0.158733	0.572047	0.147085	0.600906	-0.0779753	0.782381	0.400261	0.139314	0.106171	0.706475	-0.138009	0.623784	0.388951	0.151895	-0.203388	0.467205	0.520149	0.0468529	-0.289854	0.294675	0.0987756	0.726169	-0.506996	0.0537445	0.109932	0.696527	-0.311067	0.259098	0.45695	0.0868285	0.0456608	0.871633	-0.209744	0.453094	0.401465	0.138016	0.125622	0.655527
ENSGALG00000000318	ENSGALG00000000318	CSRP1	396176	1:776660:782042	black	-0.0432654	0.87832	-0.0939536	0.739096	0.0201136	0.94328	-0.206476	0.460323	0.008298	0.976585	-0.298639	0.279608	0.0451283	0.873119	0.0255948	0.927856	-0.195826	0.48427	-0.0169465	0.952201	-0.0913769	0.746031	0.379886	0.162512	-0.180957	0.518665	-0.101279	0.719484	-0.218726	0.433518	-0.0804877	0.775532	-0.14224	0.613078	0.450626	0.0918496	-0.205538	0.462407	-0.302967	0.27236	0.142953	0.611281	-0.0821241	0.77108
ENSGALG00000011136	ENSGALG00000011136	CAPN9	421544	1:40564709:40593020	black	0.0417679	0.882504	0.0388276	0.890728	-0.186679	0.505298	0.016339	0.953913	0.110727	0.694429	-0.0335047	0.905642	0.0827023	0.769508	0.14614	0.603274	-0.00708638	0.980004	-0.132524	0.637768	-0.0217743	0.938605	0.493429	0.0616023	0.00432229	0.987803	-0.224938	0.420236	-0.150389	0.592663	0.0208482	0.941212	-0.0688291	0.807436	0.467895	0.0786027	-0.00540902	0.984736	-0.347492	0.204414	0.127901	0.649642	-0.131447	0.640527
ENSGALG00000006588	ENSGALG00000006588	LRRC75B	769750	1:8693398:8706692	black	-0.0411642	0.884192	-0.0074868	0.978874	-0.0507564	0.857436	0.12949	0.645552	-0.0870945	0.757596	-0.0222156	0.937363	0.0119161	0.966381	0.0226728	0.936076	-0.0209289	0.940985	0.251801	0.365291	-0.0195888	0.944758	0.532072	0.0411906	0.0517266	0.854737	-0.160022	0.568888	-0.242039	0.384783	0.121926	0.665108	-0.178052	0.525512	0.604228	0.0170473	0.164978	0.556818	-0.245009	0.378795	-0.0602867	0.830995	-0.13575	0.629529
ENSGALG00000009075	ENSGALG00000009075	CD99L2	422386	1:17685301:17700030	black	0.0405742	0.885842	0.0234044	0.934017	0.2398	0.389331	-0.0581624	0.836875	-0.0324539	0.908589	0.226921	0.41604	0.00839859	0.976302	-0.0805631	0.775327	-0.047571	0.866307	-0.108768	0.6996	-0.108091	0.701391	-0.564113	0.0284917	0.00470496	0.986723	0.153013	0.586146	0.167776	0.550052	-0.0567137	0.84089	0.068282	0.80894	-0.693455	0.00414421	0.14101	0.616183	0.174352	0.534291	-0.0125631	0.964556	0.203425	0.467123
ENSGALG00000026639	ENSGALG00000026639	SMCO4	772206	1:187190153:187219427	black	-0.0399171	0.887679	-0.126813	0.65245	-0.0746289	0.791526	0.0444287	0.875071	-0.146149	0.603251	-0.319513	0.245698	-0.125175	0.656683	-0.0257144	0.92752	0.000974039	0.997251	0.103203	0.714359	-0.306234	0.266963	0.483641	0.0677679	0.0271025	0.923618	-0.234889	0.399405	-0.370646	0.173828	0.033911	0.904502	-0.0779896	0.782342	0.421879	0.117266	-0.10911	0.698698	-0.26715	0.33577	-0.162836	0.562022	-0.0379809	0.893098
ENSGALG00000029971	ENSGALG00000029971	PGLYRP2	693263	1:763832:769606	black	-0.0397829	0.888055	-0.135982	0.628938	-0.00980503	0.972334	0.0991634	0.725132	-0.219012	0.432902	-0.411178	0.127856	-0.125385	0.656141	-0.167106	0.551668	0.0514393	0.855536	0.113468	0.687214	-0.106733	0.704986	0.38248	0.159425	-0.0366706	0.896768	-0.285366	0.302552	-0.156288	0.578056	0.144935	0.606296	-0.0654959	0.816611	0.421125	0.117992	-0.156889	0.576576	-0.156515	0.577498	-0.263079	0.343465	-0.166682	0.552692
ENSGALG00000033701	ENSGALG00000033701	TRHR	395770	1:132483774:132498269	black	-0.0394292	0.889044	-0.0564286	0.84168	-0.222646	0.425112	0.0574941	0.838727	0.0225354	0.936463	-0.0432282	0.878424	-0.0560603	0.842702	0.0704064	0.803102	0.0223254	0.937054	-0.0467201	0.868679	0.104313	0.711409	0.623668	0.0129759	0.0571031	0.83981	-0.0562765	0.842102	-0.172489	0.538735	-0.00303032	0.991448	-0.019165	0.945951	0.651909	0.00845167	-0.0455247	0.872013	-0.392278	0.148117	-0.0346218	0.902509	-0.0588429	0.83499
ENSGALG00000015778	ENSGALG00000015778	GABRR1	428632	1:75770652:75790286	black	0.0390409	0.890131	0.116844	0.678361	-0.177605	0.526568	-0.0858704	0.760911	0.299728	0.277773	0.144068	0.608475	0.120142	0.669749	0.13518	0.630982	0.14715	0.600744	-0.0652689	0.817237	-0.161146	0.566142	-0.362024	0.184843	0.0109088	0.969221	0.203291	0.467422	-0.0224206	0.936786	-0.0912409	0.746398	0.278473	0.314887	-0.39575	0.144243	0.285304	0.302662	-0.0345101	0.902822	0.185047	0.509093	0.113993	0.685835
ENSGALG00000033186	ENSGALG00000033186	LRRC58	NA	1:80695646:80706829	black	0.0389329	0.890433	-0.0399856	0.887488	0.2079	0.457166	-0.123799	0.660246	0.0791455	0.779189	0.0978011	0.728776	-0.102645	0.715845	0.0188211	0.94692	-0.186104	0.506634	0.0408997	0.884931	0.127145	0.651594	-0.363648	0.182733	0.059173	0.834077	0.193115	0.490457	0.196943	0.481731	-0.239548	0.389845	0.0953737	0.735282	-0.268841	0.332603	0.116786	0.678512	0.175522	0.531508	0.0552071	0.845069	0.106247	0.706275
ENSGALG00000039376	ENSGALG00000039376	DPT	768904	1:85034495:85061724	black	0.0368411	0.89629	-0.018677	0.947326	-0.359365	0.188329	-0.0192936	0.945589	0.222666	0.425069	-0.264557	0.34066	0.166035	0.554259	0.0220877	0.937723	0.211815	0.448542	0.0704953	0.802858	-0.0202778	0.942818	0.613718	0.0149526	-0.193768	0.488965	-0.199611	0.475692	-0.188263	0.501626	0.147329	0.600297	0.0502634	0.858808	0.590232	0.0205399	-0.14585	0.603999	-0.214248	0.443224	0.128112	0.649099	-0.134409	0.632949
ENSGALG00000019719	ENSGALG00000019719	KRT24	395861	-1:7369267:7374026	black	-0.0363056	0.89779	-0.221472	0.427621	-0.16786	0.549849	-0.175806	0.530832	0.26011	0.349138	-0.241988	0.384886	0.166477	0.553188	-0.268871	0.332546	0.343342	0.210236	0.291334	0.292103	-0.0620997	0.825983	0.634405	0.0110767	-0.473808	0.0743985	-0.0756631	0.788697	-0.23821	0.392577	0.200654	0.473341	0.192381	0.492141	0.582643	0.022649	-0.120187	0.669633	-0.041469	0.88334	0.0269533	0.924037	-0.0107516	0.969665
ENSGALG00000035496	ENSGALG00000035496	NA	NA	NA:NA:NA	black	-0.0355497	0.899908	-0.170662	0.54311	0.0672621	0.811746	-0.0440812	0.876042	-0.0950109	0.736256	-0.0532391	0.850533	-0.147687	0.599401	-0.0124826	0.964783	-0.129364	0.645877	-0.116317	0.67974	0.09714	0.730546	0.403926	0.135392	-0.02908	0.918061	-0.207367	0.458347	-0.0999634	0.722995	-0.0792146	0.779001	-0.122441	0.663769	0.413996	0.125006	-0.15543	0.580171	-0.0973738	0.72992	-0.0586251	0.835593	-0.0912021	0.746502
ENSGALG00000002103	ENSGALG00000002103	TPPP3	415669	1:1222442:1224448	black	-0.0348993	0.901731	-0.106977	0.704341	-0.257605	0.353966	-0.00628626	0.982261	0.0430085	0.879038	-0.148614	0.597086	0.181686	0.516953	-0.176668	0.528788	0.253708	0.361549	0.212174	0.447756	-0.199833	0.47519	0.645551	0.0093415	-0.298614	0.279652	-0.200326	0.474079	-0.340004	0.214997	0.288172	0.297613	-0.055004	0.845632	0.538079	0.0385386	-0.0658511	0.815632	-0.255819	0.357429	-0.0127536	0.964019	-0.0612131	0.828433
ENSGALG00000045312	ENSGALG00000045312	SEMA6C	100859892	-1:242766:248366	black	0.0342988	0.903415	-0.13572	0.629607	-0.290702	0.293199	-0.0374063	0.894707	0.270466	0.329575	-0.24627	0.376268	-0.153623	0.584636	0.101157	0.71981	0.173424	0.536501	-0.0889094	0.752689	0.0591673	0.834092	0.509989	0.0521147	0.0106151	0.97005	-0.169112	0.546832	-0.178786	0.523778	-0.132342	0.638234	0.295851	0.284339	0.616692	0.014339	-0.0974927	0.729602	-0.184351	0.510718	-0.0146899	0.95856	-0.157832	0.57426
ENSGALG00000005438	ENSGALG00000005438	PARVA	423030	-1:8179591:8207462	black	-0.0333546	0.906062	0.048586	0.863478	-0.256068	0.356947	0.293817	0.287819	-0.0882744	0.754405	-0.0646877	0.818839	0.268955	0.33239	-0.239987	0.388951	0.391707	0.148762	0.397055	0.142805	-0.090083	0.74952	0.351394	0.199034	-0.174864	0.533071	-0.266383	0.337212	-0.158685	0.572164	0.556106	0.0313419	-0.0752305	0.78988	0.272678	0.32548	0.53626	0.0393279	-0.188265	0.501623	-0.159853	0.569303	-0.173447	0.536446
ENSGALG00000037396	ENSGALG00000037396	ASB8	426183	1:7256756:7259786	black	0.0331903	0.906523	0.184554	0.510244	-0.412354	0.126661	0.0407922	0.885232	0.118911	0.67296	-0.274241	0.322604	0.0440586	0.876105	0.473707	0.0744691	-0.183918	0.511729	-0.0443911	0.875177	-0.0743712	0.792232	0.41863	0.120415	0.234609	0.399985	-0.240052	0.388818	-0.131522	0.640336	-0.138767	0.62186	-0.22931	0.411016	0.422646	0.116531	-0.220305	0.430122	-0.18829	0.501565	0.309828	0.261101	-0.157667	0.574663
ENSGALG00000042573	ENSGALG00000042573	NA	NA	NA:NA:NA	black	-0.0330788	0.906836	-0.140407	0.617708	-0.264848	0.340109	0.0401385	0.88706	0.0706879	0.802329	-0.293347	0.288628	-0.0734468	0.794763	-0.0318506	0.910282	0.192326	0.492267	0.176478	0.529237	-0.0710889	0.801228	0.609916	0.0157664	-0.0621917	0.825728	-0.230639	0.408234	-0.247124	0.374561	0.0756665	0.788688	0.0771512	0.784631	0.618331	0.0140091	-0.101886	0.717867	-0.117593	0.676401	-0.0974178	0.729803	-0.126033	0.654464
ENSGALG00000036142	ENSGALG00000036142	LOXL3	425986	1:90807622:90816116	black	0.0328767	0.907403	0.111438	0.692554	-0.311529	0.258353	0.187704	0.502921	0.0538152	0.848933	-0.27432	0.322458	0.226617	0.416682	-0.00360043	0.98984	0.356252	0.192465	0.202432	0.469347	-0.0882153	0.754565	0.282093	0.308374	-0.130292	0.643491	-0.216777	0.43773	-0.159239	0.570808	0.364046	0.18222	-0.0315344	0.91117	0.161858	0.564406	-0.0878222	0.755628	0.18518	0.508784	0.0227902	0.935746	-0.117926	0.675532
ENSGALG00000008238	ENSGALG00000008238	MED13L	417027	1:11842672:12020606	black	0.0326661	0.907994	-0.0644127	0.819598	-0.121157	0.667108	-0.0110384	0.968856	-0.024247	0.931647	-0.344951	0.207967	-0.0514727	0.855443	0.0476284	0.866147	-0.0325419	0.908342	-0.0459789	0.870746	-0.1499	0.593878	0.425431	0.113889	-0.0326554	0.908024	-0.345378	0.207366	-0.236712	0.395651	0.00594954	0.983211	-0.0855664	0.761735	0.497202	0.0593386	-0.269822	0.330774	-0.218586	0.433819	-0.00697285	0.980324	-0.232156	0.405071
ENSGALG00000038954	ENSGALG00000038954	LSM11	416241	-1:12004367:12008463	black	-0.0325873	0.908215	-0.124689	0.65794	-0.155624	0.579694	0.0151182	0.957353	0.0417017	0.882689	-0.0812618	0.773425	-0.251344	0.366192	0.110591	0.694788	0.142406	0.612659	-0.226243	0.417473	-0.224077	0.422064	0.380887	0.161316	0.168	0.549512	-0.0121086	0.965838	-0.257585	0.354004	-0.159518	0.570124	0.20965	0.4533	0.139801	0.619241	-0.278663	0.314545	-0.0866772	0.758726	-0.154936	0.581391	0.204103	0.465608
ENSGALG00000007155	ENSGALG00000007155	RMI2	416628	-1:9317253:9318876	black	0.0319771	0.909927	-0.112372	0.690095	-0.228409	0.412907	-0.10387	0.712586	0.133478	0.635328	-0.0315677	0.911076	-0.0550976	0.845372	-0.00639252	0.981961	0.179552	0.52197	-0.0138139	0.96103	-0.432364	0.107493	0.431532	0.108247	-0.0383351	0.892107	0.0905328	0.748307	-0.434196	0.105846	-0.0671003	0.812192	0.162877	0.561922	0.244904	0.379007	-0.451929	0.0907985	-0.222325	0.425798	-0.0337715	0.904893	0.236101	0.396907
ENSGALG00000042173	ENSGALG00000042173	NA	NA	NA:NA:NA	black	0.0311937	0.912126	0.178625	0.524158	-0.149584	0.594666	0.0649222	0.818193	-0.0141132	0.960186	0.00576176	0.983741	0.142104	0.613421	0.215672	0.440125	-0.0814444	0.772928	-0.0860434	0.760442	0.0204009	0.942471	0.280001	0.312129	0.057262	0.83937	-0.0003662	0.998967	-0.25499	0.359044	0.0542855	0.847627	-0.219815	0.431174	0.431018	0.108715	-0.226804	0.416287	-0.26958	0.331223	0.167821	0.549944	-0.164513	0.557946
ENSGALG00000017010	ENSGALG00000017010	SPRYD7	418871	-1:170670674:170685701	black	-0.028035	0.920997	0.0870208	0.757796	-0.242853	0.383136	-0.300013	0.277296	0.352483	0.197549	-0.25883	0.351601	0.271945	0.326833	0.358563	0.189388	-0.227386	0.415062	0.0595003	0.833171	0.0634984	0.82212	0.46597	0.0800071	-0.200322	0.474089	-0.0918174	0.744844	-0.116099	0.680311	-0.162573	0.562662	-0.200282	0.474178	0.547195	0.0347603	-0.183702	0.512233	-0.109773	0.696946	0.586671	0.02151	-0.141215	0.615665
ENSGALG00000001174	ENSGALG00000001174	RCC1L	417484	-1:2786402:2799813	black	0.0279897	0.921124	0.235322	0.398512	0.0572861	0.839303	0.102191	0.717054	0.0382101	0.892456	-0.135203	0.630923	0.340557	0.214203	0.0676358	0.810718	-0.0583769	0.836281	0.216197	0.438987	0.293917	0.287648	-0.16026	0.568308	-0.0716252	0.799756	0.0138565	0.96091	0.421375	0.117751	0.219405	0.432056	-0.197664	0.480094	-0.334915	0.222382	0.350209	0.200657	0.310025	0.260782	0.242366	0.384122	0.0734576	0.794733
ENSGALG00000008905	ENSGALG00000008905	HABP2	423898	1:28388027:28407872	black	-0.027904	0.921365	-0.195338	0.48538	0.119019	0.672678	-0.0339457	0.904405	-0.106866	0.704635	0.0432282	0.878424	-0.196281	0.483234	-0.014163	0.960046	-0.143202	0.610653	-0.0236424	0.933348	0.0514997	0.855368	0.395416	0.144614	0.009004	0.974594	-0.152882	0.586471	-0.238457	0.392072	-0.113139	0.688079	-0.113559	0.686976	0.481805	0.068972	-0.0821829	0.77092	-0.105267	0.708875	-0.0972894	0.730146	-0.089108	0.752152
ENSGALG00000035629	ENSGALG00000035629	GRAMD1C	418354	-1:83813954:83865313	black	-0.0266838	0.924795	0.00759049	0.978581	0.0574936	0.838728	-0.283075	0.30662	0.274073	0.322912	-0.0137027	0.961343	0.0493392	0.861381	0.265879	0.338163	-0.304616	0.269626	0.0728758	0.796327	0.0987462	0.726248	0.226697	0.416514	-0.0605967	0.830137	-0.104833	0.710027	-0.0112687	0.968206	-0.285676	0.302003	-0.106528	0.70553	0.483363	0.0679493	-0.0405136	0.886011	-0.0227711	0.935799	0.387314	0.153776	-0.225452	0.419146
ENSGALG00000026095	ENSGALG00000026095	NA	NA	NA:NA:NA	black	-0.0254548	0.92825	-0.385376	0.156025	-0.040875	0.885	-0.31403	0.254348	0.0434537	0.877794	0.108573	0.700117	-0.264631	0.340521	-0.285126	0.302976	0.116382	0.679569	-0.48572	0.0664225	-0.299666	0.277879	0.0120823	0.965912	-0.274106	0.322851	-0.361802	0.185132	-0.187773	0.50276	-0.170654	0.54313	0.252264	0.364382	0.153077	0.585989	-0.395557	0.144457	-0.294266	0.287049	-0.176596	0.528959	-0.27862	0.314621
ENSGALG00000000407	ENSGALG00000000407	LSM7	420055	-1:646860:659632	black	-0.0252384	0.928859	-0.104963	0.709683	0.0857891	0.761131	-0.137051	0.626219	0.0800861	0.776626	0.136552	0.627488	-0.170534	0.543415	0.0770883	0.784803	-0.219495	0.431862	-0.120576	0.668619	0.192458	0.491964	0.181177	0.518148	0.0459444	0.870842	-0.191306	0.494608	0.0620792	0.826039	-0.242022	0.384817	-0.0162019	0.954299	0.516673	0.048607	-0.0207738	0.941421	-0.183621	0.512421	0.052768	0.851842	-0.327444	0.233511
ENSGALG00000033644	ENSGALG00000033644	NA	NA	NA:NA:NA	black	-0.0250901	0.929276	-0.254483	0.360034	0.165602	0.555305	-0.13729	0.62561	-0.151598	0.589655	-0.180633	0.519427	-0.156452	0.577653	-0.192983	0.490761	-0.120684	0.668339	-0.153871	0.584024	-0.0494973	0.86094	0.227723	0.41435	-0.177849	0.52599	-0.273663	0.323664	-0.135538	0.630069	-0.0499697	0.859625	-0.0652585	0.817265	0.320273	0.244513	-0.20191	0.470518	-0.198204	0.478871	-0.138294	0.623061	-0.172798	0.537997
ENSGALG00000005695	ENSGALG00000005695	CHEK2	768913	-1:7966112:7979171	black	0.0244894	0.930965	0.0918715	0.744699	0.281392	0.309628	-0.192865	0.491031	0.174817	0.533184	0.136734	0.627023	0.103924	0.712443	0.192366	0.492176	-0.302048	0.273889	-0.204028	0.465774	0.238186	0.392627	-0.461123	0.0836236	-0.0292496	0.917585	-0.0210918	0.940526	0.37719	0.165761	-0.225378	0.419304	-0.0392691	0.889492	-0.446571	0.0951752	0.376684	0.166377	0.210432	0.451578	0.339721	0.215402	-0.0284372	0.919867
ENSGALG00000039931	ENSGALG00000039931	NA	NA	NA:NA:NA	black	0.0243479	0.931363	-0.133202	0.636032	0.0808117	0.77465	0.134577	0.63252	-0.239613	0.389712	0.00267041	0.992464	-0.234677	0.399843	-0.0449153	0.873713	-0.0952078	0.735728	-0.0755994	0.788871	0.0725703	0.797165	0.362257	0.184539	0.127749	0.650036	-0.17527	0.532105	-0.21196	0.448223	-0.0148189	0.958197	-0.135695	0.629669	0.464636	0.080991	-0.169341	0.546282	-0.165711	0.555042	-0.240359	0.388192	-0.125398	0.656107
ENSGALG00000011543	ENSGALG00000011543	SDAD1	422642	-1:49984208:49998626	black	0.0237094	0.933159	0.115316	0.682364	-0.0155958	0.956007	0.152356	0.587775	-0.136499	0.627623	0.2588	0.351659	-0.164007	0.559175	0.163227	0.561071	-0.0985902	0.726665	-0.154444	0.582606	-0.102592	0.715986	-0.209625	0.453356	0.418661	0.120385	0.367558	0.177721	0.0676936	0.810559	-0.165743	0.554964	0.0106697	0.969896	-0.483388	0.0679328	-0.0768462	0.785464	-0.0424568	0.880579	-0.113541	0.687021	0.449782	0.0925347
ENSGALG00000031675	ENSGALG00000031675	NA	NA	NA:NA:NA	black	-0.0219401	0.938138	-0.0661501	0.814808	-0.0229614	0.935264	0.00576668	0.983727	-0.128717	0.64754	-0.343187	0.210457	-0.0593504	0.833585	-0.0260258	0.926644	-0.13463	0.632386	0.171245	0.541712	-0.0400591	0.887282	0.363146	0.183384	-0.00621674	0.982457	-0.134246	0.633365	-0.154352	0.582834	0.0132782	0.96254	-0.153846	0.584086	0.500718	0.0572835	-0.159543	0.570063	-0.232928	0.403466	-0.0612231	0.828405	-0.137673	0.624637
ENSGALG00000027840	ENSGALG00000027840	gga-mir-6681	102465400	-1:8414871:8414980	black	-0.0212855	0.939981	0.103422	0.713777	-0.331594	0.227288	0.205981	0.461422	-0.202434	0.469341	-0.0153834	0.956606	-0.224459	0.421253	0.303915	0.270787	-0.08825	0.754471	-0.318837	0.246754	-0.196538	0.482649	0.125413	0.656068	0.422875	0.116312	-0.239054	0.390852	-0.153117	0.585888	-0.110097	0.69609	-0.164405	0.558209	0.106777	0.704871	-0.255114	0.358804	-0.272597	0.325628	-0.0940805	0.738755	-0.142813	0.611634
ENSGALG00000033804	ENSGALG00000033804	NA	NA	NA:NA:NA	black	0.0205304	0.942106	0.086357	0.759593	-0.254169	0.360646	0.320437	0.244258	-0.182774	0.514403	-0.293142	0.28898	-0.014191	0.959967	0.062706	0.824308	0.102583	0.71601	0.146522	0.602317	-0.0294984	0.916886	0.56197	0.0292344	0.183135	0.513559	-0.244399	0.380021	-0.16136	0.565619	0.238111	0.392781	-0.177583	0.52662	0.512955	0.050536	-0.138847	0.621659	-0.184887	0.509467	-0.167428	0.550891	-0.126262	0.653874
ENSGALG00000023526	ENSGALG00000023526	NA	NA	NA:NA:NA	black	0.0205194	0.942138	-0.0218493	0.938394	-0.0252072	0.928946	0.174237	0.534565	-0.251745	0.365403	-0.395821	0.144166	-0.0948526	0.736681	-0.0464115	0.869539	-0.0435114	0.877633	0.057724	0.838089	-0.131749	0.639753	0.356435	0.192219	0.103292	0.714124	-0.242265	0.384326	-0.163019	0.561575	0.124195	0.65922	-0.144594	0.607152	0.35415	0.195289	-0.141735	0.614353	-0.266464	0.33706	-0.214523	0.442624	-0.107414	0.703183
ENSGALG00000041251	ENSGALG00000041251	HDAC10	NA	-1:20492465:20502957	black	-0.0197929	0.944183	-0.169157	0.546724	-0.116493	0.67928	-0.149206	0.59561	0.0850439	0.763152	-0.125949	0.65468	-0.0984011	0.727171	0.00570059	0.983913	0.0103344	0.970841	-0.195046	0.486046	0.0686058	0.80805	0.238865	0.391239	-0.154989	0.581259	-0.31281	0.256297	-0.0295156	0.916838	-0.0952466	0.735623	0.0050396	0.985779	0.315632	0.251801	-0.337183	0.219071	0.0799139	0.777095	0.0587545	0.835235	-0.240673	0.387554
ENSGALG00000042275	ENSGALG00000042275	TLE1L	100857637	1:1315392:1323490	black	0.0196249	0.944656	-0.0625449	0.824753	-0.307498	0.264893	0.00264402	0.992538	0.140377	0.617783	-0.251162	0.366551	0.020239	0.942927	0.0306991	0.913514	0.10812	0.701314	0.0143324	0.959568	0.0228554	0.935562	0.461071	0.0836624	-0.0909456	0.747194	-0.342778	0.211037	-0.113099	0.688183	0.0582548	0.836619	0.0382234	0.892419	0.582938	0.0225642	0.00393954	0.988883	-0.253098	0.362744	0.0467543	0.868583	-0.304016	0.270619
ENSGALG00000006121	ENSGALG00000006121	PIK3C2A	423070	-1:11958466:12018064	black	0.0185668	0.947636	0.102324	0.716701	-0.225736	0.418545	0.332592	0.225806	-0.099892	0.723186	-0.104923	0.709789	0.284177	0.30466	-0.186204	0.506401	0.337067	0.219239	0.404157	0.135147	-0.099147	0.725176	0.317993	0.248078	-0.122955	0.662436	-0.335618	0.221353	-0.140453	0.617592	0.557294	0.0309058	-0.130599	0.642702	0.249485	0.369867	0.533553	0.0405247	-0.156012	0.578736	-0.129372	0.645857	-0.213398	0.445078
ENSGALG00000028031	ENSGALG00000028031	C1QL1	430993	-1:3712055:3716130	black	-0.0182331	0.948576	0.0791533	0.779168	-0.26446	0.340844	0.281693	0.309089	-0.0606003	0.830127	-0.104764	0.710211	0.314361	0.25382	-0.201958	0.470409	0.364379	0.181789	0.426071	0.113289	-0.113022	0.688386	0.35706	0.191385	-0.182982	0.513915	-0.300357	0.276717	-0.138685	0.62207	0.558209	0.0305732	-0.11256	0.689602	0.246177	0.376455	0.536842	0.0390739	-0.155765	0.579346	-0.0955328	0.734855	-0.169069	0.546935
ENSGALG00000010491	ENSGALG00000010491	PWWP2B	423972	1:35920340:35936635	black	-0.0179767	0.949299	-0.037403	0.894716	0.0182861	0.948427	0.120729	0.66822	-0.273286	0.324358	0.0980022	0.728238	-0.0660549	0.815071	-0.0680281	0.809638	-0.0536504	0.849391	0.00510424	0.985596	-0.282023	0.308498	0.477818	0.0716406	0.104254	0.711565	-0.0716368	0.799725	-0.339328	0.215968	0.10494	0.709743	-0.228554	0.412603	0.368623	0.176373	-0.232176	0.405029	-0.403449	0.135898	-0.199069	0.476914	0.0710845	0.80124
ENSGALG00000008271	ENSGALG00000008271	CALHM1	428977	-1:24598313:24600153	black	0.0176991	0.95008	0.117113	0.677656	0.0191922	0.945875	0.235257	0.398645	-0.192949	0.490838	-0.308453	0.263334	-0.233513	0.402253	0.332577	0.225828	-0.152008	0.588639	0.0676525	0.810672	-0.135408	0.6304	0.111606	0.692111	0.420543	0.118554	-0.227892	0.413995	-0.195872	0.484165	-0.107029	0.704202	-0.175144	0.532407	0.1478	0.599119	-0.169744	0.545313	0.206058	0.461252	-0.0955052	0.734929	-0.120674	0.668366
ENSGALG00000012082	ENSGALG00000012082	FAIM	424270	-1:28267680:28275742	black	0.0145863	0.958852	0.0114802	0.96761	-0.0921884	0.743845	0.103944	0.712389	-0.0729683	0.796074	0.083557	0.767186	0.157787	0.57437	-0.35589	0.192949	0.429241	0.110343	-0.059709	0.832593	-0.222126	0.426222	-0.354991	0.194156	-0.19894	0.477207	0.0893124	0.7516	0.0603064	0.83094	0.356398	0.192269	0.206467	0.460343	-0.592469	0.0199478	0.0636338	0.821747	0.0193896	0.945319	-0.222529	0.425361	0.15809	0.573626
ENSGALG00000026692	ENSGALG00000026692	N-RAS	419885	-1:3906092:3912495	black	0.0136817	0.961402	0.0422738	0.88109	0.144196	0.608154	-0.126561	0.6531	-0.00735209	0.979254	0.361432	0.185615	-0.0302192	0.914862	0.111906	0.691322	-0.162789	0.562137	-0.27273	0.325384	-0.319945	0.245023	-0.429908	0.10973	0.128055	0.649248	0.247673	0.373468	-0.0732566	0.795284	-0.227961	0.413849	0.0223307	0.937039	-0.662807	0.00708214	0.094226	0.738364	-0.0982699	0.727522	0.0869121	0.75809	0.352715	0.197233
ENSGALG00000039458	ENSGALG00000039458	GDF8	373964	1:252348:257840	black	0.0124352	0.964917	0.0453113	0.872608	-0.0101079	0.97148	0.171	0.542299	-0.300852	0.275888	-0.143383	0.610197	-0.337486	0.218631	0.280027	0.312082	-0.337925	0.217995	-0.235501	0.398142	-0.208956	0.454831	0.0738157	0.793752	0.481911	0.0689024	-0.297143	0.282141	-0.199504	0.475933	-0.229161	0.411329	-0.209236	0.454212	0.223937	0.422361	-0.0497408	0.860262	-0.402859	0.136525	-0.161169	0.566086	-0.220276	0.430185
ENSGALG00000045818	ENSGALG00000045818	NA	NA	NA:NA:NA	black	0.0116699	0.967075	-0.0428993	0.879343	0.370131	0.174473	-0.103893	0.712524	-0.228518	0.412678	0.193389	0.489831	-0.033762	0.90492	-0.182401	0.515277	-0.205632	0.462199	-0.0389416	0.890409	-0.0591965	0.834011	-0.593675	0.019634	-0.0943814	0.737947	0.16399	0.559215	-0.0881306	0.754794	-0.045041	0.873362	-0.111452	0.692517	-0.32906	0.231075	0.0106277	0.970014	0.00123418	0.996517	-0.0731379	0.795609	-0.065652	0.816181
ENSGALG00000040397	ENSGALG00000040397	HAUS1	416380	-1:2139149:2148094	black	-0.0103572	0.970777	0.155853	0.579128	-0.251784	0.365326	0.242427	0.383999	0.101366	0.719252	-0.375731	0.167538	0.0749739	0.790582	0.227708	0.414383	0.117729	0.676047	0.10075	0.720896	0.224189	0.421826	0.548017	0.0344337	0.18415	0.511187	-0.161136	0.566167	0.214307	0.443095	0.132346	0.638224	0.000263952	0.999255	0.306033	0.267293	0.130857	0.642041	0.0428497	0.879481	0.0454258	0.872289	0.0337087	0.905069
ENSGALG00000023335	ENSGALG00000023335	RCHY1	771726	1:34596009:34599582	black	-0.00937349	0.973552	-0.127618	0.650373	-0.183784	0.512041	0.0380082	0.893022	-0.0132724	0.962557	-0.336168	0.220548	-0.0254175	0.928355	-0.125623	0.655524	0.195812	0.484301	0.154268	0.583042	-0.197577	0.480291	0.398139	0.141618	-0.150662	0.591983	-0.513026	0.0504985	-0.148511	0.597342	0.18314	0.513546	-0.0214057	0.939642	0.419132	0.119925	-0.157506	0.575061	0.0237462	0.933056	-0.112175	0.690615	-0.314067	0.254288
ENSGALG00000012987	ENSGALG00000012987	CCDC77	418149	1:60277783:60290283	black	-0.00905908	0.974438	0.00452479	0.987231	-0.0695311	0.805506	-0.136897	0.62661	0.210356	0.451745	0.0720987	0.798458	0.19498	0.486198	-0.117393	0.676924	0.0684142	0.808576	0.273692	0.323611	0.25788	0.353434	-0.180636	0.51942	-0.24085	0.387194	0.379342	0.163164	0.0807105	0.774926	0.0346907	0.902316	0.129153	0.646419	0.0428093	0.879594	0.199073	0.476906	0.0183812	0.948159	0.161349	0.565648	0.0338769	0.904598
ENSGALG00000000934	ENSGALG00000000934	ZBTB43	417091	1:10544180:10549641	black	-0.00897946	0.974663	0.185802	0.507337	-0.0185467	0.947693	0.0704573	0.802962	0.0454569	0.872202	0.20072	0.473191	0.0948279	0.736747	0.103072	0.714707	0.0487356	0.863062	0.049478	0.860994	0.100421	0.721774	-0.378757	0.163867	0.123028	0.662245	0.344574	0.208497	0.200765	0.473092	0.00705126	0.980103	0.0366447	0.89684	-0.471597	0.075951	0.0539286	0.848618	0.279924	0.312268	0.0825901	0.769813	0.222575	0.425263
ENSGALG00000008903	ENSGALG00000008903	ITPRID2	424118	-1:14156691:14197263	black	0.00836013	0.97641	-0.383844	0.157818	0.0507506	0.857452	-0.278141	0.315489	0.263504	0.342657	0.171675	0.540682	-0.179161	0.522892	-0.314688	0.253299	0.173524	0.536263	-0.144016	0.608604	0.341258	0.2132	0.172731	0.538157	-0.362798	0.183836	0.0696657	0.805136	-0.137741	0.624465	-0.152494	0.587434	0.428249	0.111259	0.634156	0.0111181	-0.0323168	0.908974	-0.191458	0.49426	-0.113699	0.686605	-0.265956	0.338017
ENSGALG00000006527	ENSGALG00000006527	CRTAM	395342	-1:3151297:3163767	black	0.00707065	0.980048	0.0992325	0.724948	0.31727	0.249214	0.197048	0.481493	-0.405884	0.133328	0.256066	0.356949	0.0110012	0.968961	-0.147318	0.600323	-0.131312	0.640873	0.17884	0.52365	-0.211531	0.449165	-0.192454	0.491973	0.18479	0.509694	0.38417	0.157435	-0.138704	0.62202	0.144006	0.60863	-0.231057	0.407362	-0.362771	0.183871	0.054048	0.848286	-0.131383	0.640692	-0.243972	0.38088	0.392758	0.147578
ENSGALG00000030894	ENSGALG00000030894	NA	NA	NA:NA:NA	black	-0.0070326	0.980155	-0.0166807	0.95295	-0.0160328	0.954775	0.127402	0.650929	-0.243125	0.382588	-0.349963	0.200996	-0.072454	0.797483	0.0036334	0.989747	-0.0694436	0.805746	-0.0413149	0.88377	-0.171381	0.541386	0.417984	0.121048	0.099536	0.724137	-0.121498	0.666222	-0.227126	0.415609	0.0800451	0.776737	-0.152981	0.586225	0.293362	0.288602	-0.197606	0.480227	-0.323875	0.238948	-0.165158	0.556381	0.0485096	0.863691
ENSGALG00000032843	ENSGALG00000032843	AAAS	100859661	-1:7355723:7362680	black	0.00496081	0.986001	-0.18325	0.51329	-0.0792653	0.778863	-0.0789944	0.779601	0.140466	0.617559	0.153468	0.585019	0.175226	0.532211	-0.406871	0.132296	0.423287	0.11592	0.220779	0.429105	-0.265122	0.339591	-0.0449815	0.873529	-0.390557	0.150064	0.0114463	0.967706	-0.0513706	0.855727	0.270335	0.329819	0.24587	0.377068	-0.37093	0.173473	0.282217	0.308152	0.122484	0.663657	-0.0971747	0.730453	0.248206	0.372405
ENSGALG00000020569	ENSGALG00000020569	DIMT1	427157	-1:19481987:19488829	black	-0.0039883	0.988745	-0.0863321	0.75966	0.233415	0.402456	0.0139815	0.960557	-0.137238	0.625742	0.184572	0.510203	-0.0291394	0.917894	-0.381702	0.160346	0.135168	0.631012	-0.19658	0.482554	0.396905	0.14297	-0.506269	0.0541457	-0.206009	0.461361	0.134935	0.631608	0.299983	0.277345	0.149935	0.593792	0.156636	0.577201	-0.21738	0.436425	0.0150281	0.957607	0.100829	0.720685	-0.23876	0.391452	-0.189504	0.498759
ENSGALG00000004679	ENSGALG00000004679	AKAP10	417612	1:6927193:6937680	black	-0.00349605	0.990134	0.016692	0.952918	0.336482	0.22009	-0.0575366	0.838609	-0.121148	0.667132	0.421105	0.118011	-0.0238782	0.932684	-0.127842	0.649796	-0.150535	0.592298	-0.00590723	0.98333	0.172694	0.538245	-0.551456	0.0330923	0.00137288	0.996126	0.422678	0.1165	0.0770769	0.784834	-0.078244	0.781648	-0.016503	0.953451	-0.318619	0.247095	0.0685639	0.808165	0.0757906	0.788349	-0.049601	0.860652	0.086289	0.759777
ENSGALG00000027462	ENSGALG00000027462	P3H4	430099	-1:7494350:7498376	black	0.00277654	0.992165	0.0153475	0.956707	-0.323264	0.239886	0.0456935	0.871542	0.163745	0.559812	-0.26005	0.349253	0.137289	0.625612	0.0447992	0.874037	0.150143	0.593275	0.083151	0.768289	0.261985	0.34555	0.607173	0.0163744	-0.120034	0.670032	-0.0123999	0.965016	-0.0745339	0.791786	0.134039	0.633895	0.0297927	0.916059	0.675822	0.00568216	-0.0968798	0.731243	-0.217097	0.437036	0.0964627	0.732361	-0.108211	0.701073
ENSGALG00000036310	ENSGALG00000036310		NA	1:2117081:2139580	black	-0.00164678	0.995353	-0.293843	0.287776	-0.102812	0.7154	-0.169967	0.544778	0.104649	0.710516	-0.0879448	0.755296	-0.178567	0.524295	-0.291279	0.292199	0.344285	0.208904	-0.0657305	0.815965	-0.429277	0.110309	0.00346458	0.990223	-0.255068	0.358892	-0.357755	0.19046	-0.253973	0.361029	0.0103162	0.970893	0.328623	0.231732	0.091533	0.74561	-0.2994	0.278325	0.0462145	0.870089	-0.221193	0.428218	-0.243407	0.382018
ENSGALG00000002739	ENSGALG00000002739	INPP5K	771549	-1:5408476:5424636	blue	-0.777575	0.000644248	-0.762689	0.000944046	0.71399	0.00279091	-0.780972	0.000588111	-0.198798	0.477528	0.347864	0.203897	-0.650805	0.00860119	-0.245787	0.377234	-0.626865	0.0123858	0.127274	0.651261	0.552883	0.0325475	0.105108	0.709298	-0.289312	0.29562	0.340937	0.213659	0.340501	0.214283	-0.75052	0.00126541	-0.0858883	0.760863	0.434659	0.105431	0.0537024	0.849246	0.374596	0.168929	-0.104775	0.71018	0.0543929	0.847329
ENSGALG00000043591	ENSGALG00000043591	PLA2G4F	428871	-1:25782297:25801921	blue	-0.769491	0.000795508	-0.686979	0.00466477	0.576622	0.0244368	-0.589486	0.0207402	-0.193051	0.490605	0.404727	0.134545	-0.627138	0.0123365	-0.227248	0.415351	-0.446184	0.095497	0.291025	0.292639	0.579891	0.0234534	0.0983928	0.727193	-0.181021	0.518513	0.406848	0.13232	0.299235	0.278604	-0.621709	0.013348	-0.0157086	0.955689	0.397655	0.142148	0.309538	0.261571	0.433861	0.106146	-0.190266	0.497003	0.0914232	0.745906
ENSGALG00000042474	ENSGALG00000042474	FOXD2	395795	1:22337943:22339289	blue	0.71373	0.00280546	0.697766	0.00382403	-0.628312	0.0121258	0.679244	0.00535308	0.170759	0.542877	-0.357336	0.191018	0.641608	0.00992911	0.113008	0.688424	0.642162	0.00984489	-0.160494	0.567735	-0.462905	0.082281	-0.218553	0.433891	0.134821	0.631898	-0.321179	0.243106	-0.301285	0.275163	0.765791	0.000873759	0.115085	0.682969	-0.343476	0.210047	-0.189384	0.499037	-0.350408	0.200384	0.0697866	0.804804	-0.218644	0.433695
ENSGALG00000041187	ENSGALG00000041187	NA	NA	NA:NA:NA	blue	-0.711611	0.00292653	-0.677555	0.00551359	0.476088	0.0728215	-0.659118	0.00752457	-0.166163	0.553947	0.45804	0.0859825	-0.681043	0.00518629	-0.0309851	0.912712	-0.613488	0.0150009	0.086259	0.759858	0.242379	0.384094	0.119936	0.670286	-0.0637291	0.821484	0.189367	0.499075	0.0344073	0.903111	-0.799121	0.000351365	-0.094755	0.736943	0.414901	0.1241	0.36123	0.185879	0.100308	0.722075	-0.0738423	0.79368	0.00931513	0.973716
ENSGALG00000007695	ENSGALG00000007695	SNAPC5	415550	-1:18940350:18942751	blue	-0.675878	0.00567665	-0.752747	0.00120081	0.497064	0.0594201	-0.906929	3.11e-06	0.119398	0.671689	0.351074	0.199471	-0.543274	0.0363498	-0.141944	0.613826	-0.497756	0.0590108	-0.0266068	0.925011	0.266292	0.337384	0.102316	0.716722	-0.367582	0.177691	0.152309	0.587891	0.289706	0.294933	-0.819932	0.0001821	0.111628	0.692054	0.236491	0.396104	0.182452	0.515158	0.278002	0.31574	0.0973984	0.729854	0.0926253	0.742669
ENSGALG00000016314	ENSGALG00000016314	ELOVL5	428646	1:88246591:88283573	blue	0.67447	0.00581644	0.615775	0.0145261	-0.675555	0.00570844	0.440674	0.10016	0.516518	0.0486864	-0.543027	0.0364517	0.76052	0.000995862	0.116606	0.678984	0.724967	0.00222856	0.0563815	0.841811	-0.17909	0.52306	-0.0608682	0.829387	-0.155777	0.579316	-0.166453	0.553246	-0.193536	0.489495	0.692845	0.00419119	0.282969	0.306809	-0.103778	0.712831	-0.289156	0.295892	-0.0144376	0.959272	0.316703	0.250107	-0.200815	0.472978
ENSGALG00000008914	ENSGALG00000008914	NRAP	423899	-1:28407511:28452857	blue	0.658458	0.00760601	0.680721	0.00521587	-0.529642	0.0423011	0.867128	2.85e-05	0.0249941	0.929546	-0.302427	0.273258	0.563469	0.0287136	0.0547744	0.84627	0.652703	0.00834536	0.092174	0.743884	-0.271974	0.326779	-0.0973483	0.729989	0.273352	0.324238	-0.184162	0.511158	-0.215579	0.440328	0.847138	6.73e-05	0.0718657	0.799097	-0.310336	0.260278	0.0805746	0.775296	-0.227354	0.415129	-0.112638	0.689395	-0.0538628	0.848801
ENSGALG00000008601	ENSGALG00000008601	AHSG	424956	1:16291385:16337111	blue	0.657434	0.00773361	0.826416	0.000145882	-0.473167	0.0748465	0.771693	0.000751726	0.0656741	0.81612	-0.416511	0.1225	0.777661	0.00064278	0.215995	0.439425	0.447808	0.0941517	0.137151	0.625964	-0.197323	0.480868	-0.0719543	0.798854	0.188302	0.501538	-0.175177	0.532327	-0.158783	0.571926	0.846415	6.93e-05	-0.176836	0.528389	-0.267584	0.334956	-0.0487643	0.862982	-0.148591	0.597144	0.187379	0.503675	-0.0915356	0.745604
ENSGALG00000039549	ENSGALG00000039549	SEL1L3	422804	1:73376533:73408302	blue	-0.651957	0.0084452	-0.75698	0.00108535	0.463635	0.081735	-0.684517	0.00487579	-0.0467726	0.868532	0.255096	0.358838	-0.635324	0.0109248	-0.265985	0.337963	-0.297796	0.281035	-0.127263	0.651289	0.0822433	0.770756	0.225302	0.419464	-0.220199	0.43035	0.0891558	0.752023	0.322401	0.241215	-0.657652	0.00770629	0.217417	0.436345	0.0423633	0.88084	0.157553	0.574943	0.168805	0.547572	-0.211977	0.448186	0.292562	0.289981
ENSGALG00000044908	ENSGALG00000044908	NA	NA	NA:NA:NA	blue	0.647876	0.00900799	0.616638	0.01435	-0.549932	0.0336817	0.861945	3.6e-05	0.00739375	0.979136	-0.410755	0.128287	0.508428	0.0529602	-0.0429856	0.879102	0.744326	0.00145998	0.0900858	0.749513	-0.242719	0.383408	-0.0794997	0.778224	0.21082	0.450726	-0.242177	0.384503	-0.179847	0.521277	0.884941	1.17e-05	0.135663	0.629751	-0.240922	0.387047	-0.110773	0.694308	-0.133818	0.634459	-0.203268	0.467474	-0.131644	0.640023
ENSGALG00000015231	ENSGALG00000015231	ZBTB24	421763	1:66916714:66925265	blue	-0.646378	0.00922188	-0.583222	0.0224825	0.679474	0.0053315	-0.645646	0.00932779	-0.220827	0.429002	0.498463	0.0585953	-0.587522	0.0212752	-0.141404	0.615189	-0.675714	0.00569274	0.122298	0.664142	0.441266	0.0996521	-0.0124557	0.964859	-0.0963278	0.732723	0.460734	0.0839182	0.234417	0.400381	-0.730271	0.00199161	-0.131184	0.641202	0.365853	0.179896	0.104428	0.711103	0.154366	0.5828	-0.0856512	0.761505	0.0962936	0.732815
ENSGALG00000002818	ENSGALG00000002818	VAT1	420009	-1:7935605:7944619	blue	-0.643496	0.00964422	-0.691031	0.00433335	0.62877	0.0120443	-0.744112	0.00146711	-0.113895	0.686091	0.242488	0.383874	-0.711713	0.00292058	-0.0421565	0.881418	-0.662559	0.00711125	-0.104089	0.712002	0.327587	0.233295	0.157443	0.575215	-0.0921722	0.743889	0.229013	0.411639	0.268358	0.333506	-0.883497	1.26e-05	-0.0133396	0.962367	0.296237	0.283682	-0.0723426	0.797789	0.267397	0.335307	-0.0545479	0.846898	0.165883	0.554625
ENSGALG00000041693	ENSGALG00000041693		NA	-1:8972420:8974651	blue	-0.638625	0.0103925	-0.540544	0.0374879	0.365889	0.17985	-0.607115	0.0163875	-0.167131	0.551607	0.279696	0.312678	-0.509534	0.0523604	-0.0185293	0.947742	-0.602798	0.0173814	0.060836	0.829476	0.286978	0.299709	0.168276	0.548846	-0.0935771	0.740108	0.0944901	0.737655	0.362675	0.183995	-0.65584	0.00793571	-0.239677	0.389581	0.223922	0.422395	-0.0196541	0.944574	0.284353	0.304347	0.0390059	0.890229	0.0913512	0.7461
ENSGALG00000000215	ENSGALG00000000215	DCP2	769972	-1:46038892:46065354	blue	-0.635223	0.0109414	-0.706649	0.00322635	0.647358	0.00908149	-0.862778	3.47e-05	0.0147436	0.958409	0.367961	0.177211	-0.557944	0.0306693	-0.113975	0.685881	-0.613973	0.0148992	-0.0652743	0.817222	0.357951	0.1902	0.0840326	0.765895	-0.296509	0.283219	0.311818	0.25789	0.267857	0.334443	-0.842305	8.14e-05	0.0202472	0.942904	0.219674	0.431478	0.0315156	0.911222	0.30308	0.272172	0.0783841	0.781265	0.199738	0.475405
ENSGALG00000030039	ENSGALG00000030039	NA	NA	NA:NA:NA	blue	0.634719	0.0110245	0.655393	0.00799305	-0.524143	0.0448958	0.850978	5.76e-05	-0.0405192	0.885995	-0.373381	0.170426	0.575172	0.0248829	-0.0383748	0.891995	0.680306	0.00525408	0.124236	0.659115	-0.276182	0.319051	-0.139171	0.620836	0.182087	0.516013	-0.281716	0.309048	-0.168388	0.548575	0.922373	9.93e-07	0.0132693	0.962565	-0.292733	0.289685	-0.0923905	0.743301	-0.127569	0.6505	-0.146696	0.601879	-0.170796	0.542788
ENSGALG00000007158	ENSGALG00000007158	SOCS1	416630	1:9342202:9344743	blue	-0.623625	0.012984	-0.700472	0.00363339	0.40849	0.130614	-0.736478	0.0017404	-0.0132204	0.962703	0.290729	0.293152	-0.596569	0.0188966	-0.114851	0.683582	-0.401502	0.137977	-0.106435	0.705776	-0.0330267	0.906982	0.0277074	0.921918	-0.194197	0.487985	0.152308	0.587895	0.103125	0.714567	-0.75477	0.00114447	0.145644	0.604515	-0.0588479	0.834977	0.240287	0.388339	0.158038	0.573753	-0.058815	0.835067	0.270521	0.329473
ENSGALG00000039898	ENSGALG00000039898	NA	NA	NA:NA:NA	blue	0.619429	0.0137916	0.641882	0.00988737	-0.670581	0.00621683	0.637004	0.0106514	0.198386	0.47846	-0.225658	0.41871	0.688911	0.00450432	0.0588743	0.834903	0.667735	0.00652341	-0.0892466	0.751778	-0.321977	0.241871	-0.0177642	0.949897	0.0413345	0.883716	-0.211221	0.449844	-0.293026	0.289181	0.798842	0.000354293	0.0970932	0.730672	-0.150034	0.593546	-0.0685285	0.808262	-0.438102	0.102391	0.0931164	0.741347	-0.170238	0.544127
ENSGALG00000031586	ENSGALG00000031586	NA	NA	NA:NA:NA	blue	-0.615078	0.0146696	-0.635971	0.0108188	0.562493	0.0290519	-0.55299	0.032507	-0.369496	0.175271	0.716164	0.0026714	-0.676138	0.00565114	-0.137165	0.625928	-0.657353	0.00774377	-0.137073	0.626163	0.208187	0.45653	0.203623	0.466679	0.0107151	0.969767	0.377302	0.165625	-0.0714718	0.800177	-0.717086	0.00262194	-0.206828	0.45954	0.424143	0.115106	0.047007	0.867879	-0.216564	0.43819	-0.215466	0.440572	0.180501	0.519737
ENSGALG00000004373	ENSGALG00000004373	KCNJ16	427812	1:8145867:8171206	blue	0.613988	0.0148961	0.704692	0.00335117	-0.533675	0.0404701	0.715578	0.00270316	0.0721152	0.798413	-0.351795	0.198487	0.785058	0.000525926	0.0101276	0.971425	0.600444	0.0179427	0.191847	0.493367	-0.216551	0.438219	-0.021168	0.940311	0.0107122	0.969776	-0.154001	0.583702	-0.206967	0.459234	0.935962	2.94e-07	-0.0935233	0.740253	-0.18056	0.519598	-0.0903374	0.748834	-0.193887	0.488692	0.0962534	0.732923	-0.115228	0.682593
ENSGALG00000028346	ENSGALG00000028346		NA	-1:1576880:1580042	blue	-0.610517	0.0156357	-0.725975	0.00218189	0.58043	0.0232943	-0.726709	0.00214836	-0.0494288	0.861131	0.510312	0.0519411	-0.663865	0.00695914	-0.116977	0.678012	-0.563014	0.0288707	-0.0236756	0.933254	0.15335	0.585311	0.137251	0.625709	-0.124718	0.657866	0.243764	0.381299	0.046337	0.869747	-0.832896	0.000115822	0.078237	0.781667	0.292152	0.290689	0.369216	0.175624	0.00228631	0.993548	-0.0876838	0.756002	0.181123	0.518275
ENSGALG00000037545	ENSGALG00000037545	GRIP2	416043	-1:11417142:11482054	blue	0.603153	0.017298	0.626545	0.0124439	-0.567146	0.0274649	0.635773	0.0108512	0.0882151	0.754565	-0.398265	0.14148	0.734229	0.00182828	-0.00170589	0.995186	0.581984	0.0228398	0.246914	0.374981	-0.336948	0.219412	0.105482	0.708304	-0.0263232	0.925808	-0.167017	0.551884	-0.335933	0.220892	0.873196	2.13e-05	-0.0995546	0.724087	-0.0525153	0.852545	-0.267944	0.334282	-0.208228	0.45644	0.0998651	0.723258	-0.0922722	0.743619
ENSGALG00000021193	ENSGALG00000021193	STARD5	770108	1:12543742:12547993	blue	-0.594269	0.0194809	-0.563414	0.0287325	0.461661	0.0832159	-0.789008	0.000471003	0.103591	0.713328	0.27467	0.321817	-0.405306	0.133935	0.00530743	0.985023	-0.584963	0.0219876	0.106244	0.706282	0.412765	0.126245	-0.0450144	0.873437	-0.309868	0.261037	0.117897	0.675607	0.282803	0.307105	-0.737447	0.00170362	-0.0670832	0.812239	0.291847	0.291215	0.257527	0.354117	0.385187	0.156245	0.242487	0.383876	-0.106532	0.705519
ENSGALG00000032780	ENSGALG00000032780	TTC13	421545	-1:40629526:40666062	blue	-0.587904	0.0211703	-0.539599	0.0378882	0.688628	0.0045276	-0.659477	0.00748065	-0.168671	0.547895	0.334055	0.223646	-0.625008	0.012726	0.0894781	0.751153	-0.831363	0.000122425	0.00450359	0.987291	0.384543	0.156997	0.12168	0.665748	0.0280346	0.920998	0.305935	0.267453	0.212575	0.446876	-0.874177	2.03e-05	-0.205304	0.46293	0.371413	0.172869	0.0301554	0.915041	0.196552	0.482619	0.0467671	0.868548	0.132211	0.638569
ENSGALG00000013882	ENSGALG00000013882	MXD1	426299	1:4110333:4118011	blue	0.58742	0.0213031	0.695618	0.00398104	-0.523704	0.0451077	0.871482	2.32e-05	-0.0863347	0.759653	-0.40801	0.131112	0.59827	0.0184731	0.0441128	0.875954	0.596313	0.0189611	0.175954	0.53048	-0.230634	0.408244	-0.00523125	0.985238	0.236745	0.395581	-0.213269	0.445359	-0.152755	0.586785	0.912875	2.05e-06	-0.102288	0.716797	-0.248371	0.372077	-0.113061	0.688284	-0.11499	0.683219	-0.0977837	0.728823	-0.0685974	0.808073
ENSGALG00000002335	ENSGALG00000002335	DOCK3	107048988	1:2360795:2623950	blue	0.586219	0.0216356	0.802793	0.000314629	-0.661428	0.00724513	0.673358	0.00592883	0.120285	0.669378	-0.379616	0.162835	0.823237	0.000162815	0.213465	0.44493	0.483278	0.0680048	0.141295	0.615464	-0.28099	0.310349	-0.0914667	0.745789	0.0983223	0.727381	-0.212529	0.446976	-0.151899	0.588908	0.83858	9.38e-05	-0.197731	0.479942	-0.278719	0.314443	-0.112018	0.691028	-0.184724	0.509848	0.274933	0.321334	-0.146575	0.602184
ENSGALG00000029308	ENSGALG00000029308	PNPLA3	418233	1:69044299:69089535	blue	-0.584897	0.022006	-0.604537	0.0169758	0.555466	0.0315786	-0.81426	0.000219548	-0.0108283	0.969448	0.348308	0.203281	-0.525748	0.0441267	0.0303089	0.91461	-0.730386	0.00198667	-0.126634	0.652912	0.322114	0.241659	-0.013303	0.96247	-0.204525	0.464665	0.185891	0.507129	0.17163	0.54079	-0.866157	2.98e-05	-0.0973513	0.729981	0.288078	0.297777	0.146381	0.602669	0.11857	0.673849	0.17114	0.541963	-0.00461573	0.986975
ENSGALG00000030499	ENSGALG00000030499	MOB2	423097	1:14412214:14510673	blue	0.58274	0.0226212	0.578177	0.0239652	-0.617542	0.0141672	0.634944	0.0109873	0.176673	0.528776	-0.29698	0.282419	0.748675	0.00132104	-0.10333	0.714022	0.76376	0.000919277	0.13856	0.622386	-0.26176	0.345979	0.0537599	0.849086	-0.109923	0.696552	-0.169847	0.545066	-0.238367	0.392257	0.931776	4.39e-07	0.089128	0.752098	-0.14674	0.60177	-0.0717876	0.799311	-0.235387	0.398378	0.0419644	0.881955	-0.0960503	0.733467
ENSGALG00000041558	ENSGALG00000041558		NA	-1:16649673:16656261	blue	0.581943	0.0228518	0.484406	0.0672704	-0.311563	0.258299	0.589797	0.0206565	0.0210689	0.940591	-0.179576	0.521916	0.561783	0.0292999	-0.176527	0.529123	0.598605	0.0183906	0.0399036	0.887717	-0.409455	0.129619	-0.115088	0.682962	-0.0125983	0.964457	-0.119256	0.67206	-0.321288	0.242936	0.785409	0.000520847	0.103061	0.714737	-0.282533	0.307587	-0.0342544	0.903539	-0.351616	0.19873	-0.120686	0.668334	-0.0205022	0.942186
ENSGALG00000046288	ENSGALG00000046288	UPK3B	NA	-1:4327079:4327988	blue	0.578378	0.0239049	0.618143	0.0140468	-0.457113	0.0867012	0.76479	0.000895955	-0.0412877	0.883846	-0.251581	0.365725	0.601701	0.0176413	-0.0626233	0.824537	0.557597	0.0307956	0.258369	0.35249	-0.108161	0.701206	-0.0292701	0.917527	0.117858	0.675709	-0.0459157	0.870922	-0.221177	0.428253	0.867721	2.77e-05	-0.0644984	0.819361	-0.0388016	0.890801	-0.078909	0.779834	-0.225172	0.419741	-0.0845897	0.764383	-0.127919	0.649598
ENSGALG00000037576	ENSGALG00000037576	VSX1	395537	-1:16155290:16157946	blue	0.577225	0.024253	0.779613	0.000610067	-0.657313	0.00774879	0.751314	0.00124206	0.0386326	0.891274	-0.384515	0.157031	0.733849	0.00184351	0.185392	0.508291	0.518819	0.0475184	0.153561	0.58479	-0.275206	0.320835	-0.0989337	0.725746	0.172937	0.537666	-0.202591	0.468991	-0.184707	0.509886	0.851596	5.62e-05	-0.175803	0.53084	-0.26896	0.332381	-0.117579	0.676438	-0.166319	0.553571	0.151652	0.589522	-0.145547	0.60476
ENSGALG00000002150	ENSGALG00000002150	CPEB1	415326	-1:1793936:1820488	blue	-0.576933	0.024342	-0.641477	0.00994912	0.581197	0.0230692	-0.793145	0.000418597	0.031039	0.91256	0.333875	0.223911	-0.633343	0.0112541	0.0280411	0.92098	-0.669331	0.00635006	-0.125871	0.654883	0.394152	0.146018	0.070325	0.803325	-0.13134	0.640802	0.282557	0.307544	0.218299	0.434439	-0.92754	6.42e-07	0.0336809	0.905147	0.346202	0.206212	0.00311666	0.991205	0.227262	0.415322	0.0850006	0.763269	0.0876815	0.756008
ENSGALG00000044110	ENSGALG00000044110	NA	NA	NA:NA:NA	blue	0.576174	0.0245738	0.718401	0.00255271	-0.536173	0.039366	0.710857	0.00297062	0.0461032	0.870399	-0.352255	0.197859	0.735966	0.00176012	0.0633894	0.822421	0.533268	0.0406522	0.19837	0.478496	-0.271394	0.327854	-0.0787009	0.780401	0.0829602	0.768807	-0.302125	0.273761	-0.109463	0.697765	0.889542	9.06e-06	-0.151552	0.58977	-0.220171	0.430409	-0.065879	0.815555	-0.148666	0.596956	0.106558	0.705451	-0.213958	0.443856
ENSGALG00000008060	ENSGALG00000008060	PRKAR2B	769420	1:14593473:14674699	blue	-0.569039	0.0268384	-0.476668	0.0724241	0.53577	0.0395424	-0.444792	0.0966606	-0.242489	0.383872	0.293973	0.287552	-0.574798	0.0249988	-0.0793967	0.778504	-0.601786	0.0176212	0.017934	0.949419	0.622008	0.0132907	0.202392	0.469436	0.0666327	0.813479	0.491883	0.0625478	0.491148	0.0630013	-0.638897	0.0103495	-0.107769	0.702245	0.318652	0.247044	-0.06331	0.822641	0.164907	0.55699	-0.147452	0.599988	0.286635	0.300312
ENSGALG00000007755	ENSGALG00000007755	NEXMIF	422325	-1:12376599:12497277	blue	-0.568973	0.0268602	-0.706683	0.00322423	0.620823	0.0135191	-0.57015	0.0264759	-0.249288	0.370256	0.374635	0.168881	-0.891599	8.06e-06	-0.0796399	0.777842	-0.613995	0.0148947	-0.176597	0.528956	0.258319	0.352585	-0.00525508	0.985171	0.10491	0.709822	0.164393	0.558236	0.151166	0.590729	-0.884411	1.2e-05	0.0506119	0.857838	0.254526	0.359949	0.0245038	0.930925	0.161106	0.566239	-0.287202	0.299315	0.0676192	0.810764
ENSGALG00000010999	ENSGALG00000010999	DICER1	423437	-1:46021692:46065300	blue	0.567264	0.0274255	0.59385	0.0195889	-0.520664	0.0465973	0.571223	0.0261292	0.224382	0.421417	-0.625413	0.0126512	0.736276	0.00174816	-0.0382092	0.892459	0.683129	0.00499799	0.200767	0.473087	-0.194183	0.488015	-0.0299608	0.915587	-0.120068	0.669943	-0.244254	0.380312	-0.0183833	0.948153	0.861837	3.62e-05	0.10065	0.721162	-0.268877	0.332536	-0.159363	0.570503	0.0545742	0.846825	0.118363	0.674391	-0.101169	0.719779
ENSGALG00000032534	ENSGALG00000032534		420395	-1:2173497:2346313	blue	0.566133	0.0278047	0.717117	0.00262032	-0.535488	0.0396665	0.718507	0.0025472	-0.0286947	0.919143	-0.45769	0.0862532	0.702273	0.00351069	0.132874	0.636873	0.449146	0.0930535	0.186576	0.505537	-0.228383	0.412961	0.116705	0.678724	0.122477	0.663678	-0.189079	0.499741	-0.243193	0.382451	0.848957	6.26e-05	-0.251166	0.366542	-0.0398596	0.88784	-0.324259	0.238358	-0.170098	0.544464	0.114153	0.685415	-0.125101	0.656876
ENSGALG00000002403	ENSGALG00000002403	ULK1	416800	-1:2927966:2996889	blue	-0.565912	0.0278793	-0.525001	0.0444833	0.474668	0.0738004	-0.665646	0.00675587	-0.0356154	0.899724	0.0930963	0.741402	-0.425908	0.113441	0.0323155	0.908978	-0.645313	0.00937616	0.142802	0.611661	0.351598	0.198756	0.151938	0.588813	-0.182725	0.514518	0.131853	0.639486	0.277861	0.315997	-0.688038	0.00457626	-0.171821	0.540332	0.279422	0.313173	0.167648	0.550361	0.317757	0.248447	0.160875	0.566804	0.0832966	0.767893
ENSGALG00000038765	ENSGALG00000038765	NA	NA	NA:NA:NA	blue	0.564956	0.0282034	0.43074	0.108969	-0.350218	0.200645	0.510806	0.0516763	0.0239711	0.932423	-0.513922	0.0500287	0.433752	0.106243	-0.0913375	0.746137	0.486382	0.0659984	-0.0551377	0.845261	-0.381643	0.160416	-0.245768	0.377273	0.00676849	0.9809	-0.331519	0.227398	-0.222884	0.424605	0.637431	0.0105826	0.116641	0.678892	-0.29559	0.284785	-0.136973	0.626417	-0.249257	0.370318	-0.0856473	0.761516	-0.214272	0.443172
ENSGALG00000039257	ENSGALG00000039257	CYP4F11	100859277	-1:756102:763625	blue	0.563236	0.0287939	0.725836	0.00218829	-0.536937	0.0390328	0.649765	0.00874402	0.114977	0.683252	-0.369946	0.174705	0.851817	5.56e-05	0.0635938	0.821857	0.559124	0.0302433	0.236407	0.396276	-0.224186	0.421832	-0.0363502	0.897665	-0.0403872	0.886364	-0.176686	0.528744	-0.154953	0.581349	0.922172	1.01e-06	-0.152904	0.586417	-0.241912	0.385039	-0.0440367	0.876166	-0.102698	0.715703	0.211035	0.450253	-0.109307	0.698178
ENSGALG00000003443	ENSGALG00000003443	LRRC52	NA	1:5849184:5851743	blue	0.557982	0.0306555	0.684361	0.00488943	-0.355028	0.194105	0.748035	0.00134079	-0.100147	0.722504	-0.448062	0.093942	0.660526	0.00735319	0.0333888	0.905967	0.459045	0.0852088	0.313426	0.255311	-0.262295	0.344958	-0.156469	0.577612	0.113984	0.685859	-0.251001	0.366869	-0.165566	0.555394	0.885104	1.16e-05	-0.228915	0.411846	-0.302514	0.273112	-0.0950519	0.736146	0.0515596	0.855202	0.0176316	0.950271	-0.148422	0.597564
ENSGALG00000002637	ENSGALG00000002637	RBP7	419447	1:3596396:3598338	blue	-0.554223	0.0320419	-0.622219	0.0132503	0.570767	0.0262761	-0.736677	0.00173279	-0.0234835	0.933795	0.342037	0.21209	-0.700591	0.00362513	0.0760838	0.787547	-0.694652	0.00405328	-0.200875	0.472843	0.252809	0.363311	-0.00690605	0.980512	-0.00640165	0.981935	0.196232	0.483346	0.201004	0.472553	-0.962111	1.03e-08	0.032648	0.908045	0.195618	0.484744	0.0699158	0.804449	0.168115	0.549235	0.0305394	0.913963	0.108683	0.699825
ENSGALG00000006796	ENSGALG00000006796	SRPX2	422261	-1:5171035:5178153	blue	0.551506	0.0330733	0.552947	0.0325232	-0.439021	0.101591	0.739959	0.00161112	-0.0894379	0.751261	-0.377837	0.164977	0.552583	0.0326614	-0.101343	0.719314	0.595469	0.0191744	0.18388	0.511816	-0.202647	0.468864	0.150066	0.593466	0.0784343	0.781128	-0.146436	0.602531	-0.242742	0.383361	0.882579	1.32e-05	-0.0766573	0.78598	-0.00243066	0.993141	-0.351814	0.19846	-0.159473	0.570233	-0.144633	0.607053	-0.0766987	0.785867
ENSGALG00000031620	ENSGALG00000031620	NA	NA	NA:NA:NA	blue	0.549509	0.0338468	0.546874	0.0348884	-0.556757	0.0311024	0.590797	0.0203892	0.242121	0.384618	-0.38119	0.160955	0.664547	0.00688074	0.000951307	0.997315	0.694129	0.00409283	0.330593	0.228779	-0.174001	0.535127	0.208752	0.455282	-0.0329808	0.907111	0.0747886	0.791089	-0.298787	0.279359	0.782158	0.000569477	0.127672	0.650235	-0.0118496	0.966568	-0.180292	0.520228	-0.0441449	0.875864	0.0769417	0.785203	0.105604	0.70798
ENSGALG00000041226	ENSGALG00000041226	RRAGA	422311	-1:11471654:11485646	blue	-0.547197	0.0347591	-0.566071	0.0278257	0.607208	0.0163666	-0.4591	0.0851666	-0.257571	0.354031	0.0345043	0.902839	-0.652982	0.00830827	-0.141827	0.614119	-0.497826	0.05897	-0.0742069	0.792681	0.304653	0.269566	0.140962	0.616304	0.035692	0.899509	0.255734	0.357596	0.421987	0.117163	-0.630677	0.0117097	0.0336649	0.905192	0.0241681	0.931869	-0.00246422	0.993046	0.239625	0.389688	-0.264447	0.340868	0.355689	0.193219
ENSGALG00000002908	ENSGALG00000002908	TRAIP	415927	-1:2972533:2990373	blue	0.545637	0.0353855	0.755123	0.00113485	-0.690308	0.00439109	0.659102	0.00752653	0.0858909	0.760856	-0.335274	0.221856	0.762111	0.000957643	0.187085	0.504356	0.485436	0.066605	0.108218	0.701055	-0.301176	0.275345	-0.10572	0.707672	0.109942	0.696499	-0.237014	0.395029	-0.137154	0.625955	0.811591	0.000239237	-0.192555	0.491742	-0.294156	0.287238	-0.121936	0.665081	-0.203524	0.466901	0.228609	0.412486	-0.158253	0.573225
ENSGALG00000015110	ENSGALG00000015110	FAM189A2	NA	1:34698424:34709646	blue	0.545624	0.0353907	0.649403	0.00879416	-0.307669	0.264612	0.609522	0.0158527	0.00438226	0.987633	-0.178765	0.523828	0.593418	0.0197007	0.0736976	0.794076	0.397602	0.142205	0.146455	0.602483	-0.264202	0.341332	-0.41864	0.120405	0.149115	0.595836	-0.0352316	0.9008	-0.106909	0.70452	0.677022	0.00556497	-0.0926298	0.742657	-0.573173	0.0255079	-0.0354862	0.900086	0.0319973	0.909871	0.0798441	0.777285	0.000557562	0.998427
ENSGALG00000033683	ENSGALG00000033683	PHOSPHO1	395650	1:6034509:6040276	blue	0.544814	0.035719	0.669099	0.00637502	-0.439748	0.10096	0.753079	0.00119142	-0.0552326	0.844998	-0.498418	0.0586214	0.646	0.00927633	0.0800496	0.776725	0.493242	0.0617164	0.175392	0.531817	-0.20518	0.463204	0.204836	0.463972	0.158158	0.573459	-0.130751	0.642312	-0.126352	0.653639	0.853945	5.09e-05	-0.175728	0.531018	-0.183732	0.512163	-0.294622	0.286439	-0.0717938	0.799294	0.0125432	0.964612	0.0973945	0.729865
ENSGALG00000003670	ENSGALG00000003670	MAFB	419173	-1:4690689:4693338	blue	0.544237	0.0359544	0.594201	0.0194983	-0.533851	0.0403914	0.587489	0.021284	0.0993182	0.724719	-0.500629	0.0573346	0.630085	0.0118128	-0.00668318	0.981141	0.568713	0.0269455	0.112976	0.688506	-0.0219206	0.938193	-0.0974222	0.729791	-0.0572733	0.839338	-0.234839	0.399509	-0.0873853	0.756809	0.799848	0.000343828	-0.0270806	0.923679	0.0150731	0.95748	-0.401524	0.137954	-0.0025361	0.992843	0.0832806	0.767937	-0.371672	0.172546
ENSGALG00000002880	ENSGALG00000002880	AARSD1	107049007	-1:7907883:7912277	blue	-0.542365	0.0367257	-0.64885	0.0088712	0.473982	0.0742774	-0.728044	0.0020885	0.0804632	0.775599	0.292409	0.290245	-0.690196	0.00440006	0.0664222	0.814059	-0.576637	0.0244323	-0.215143	0.441275	0.269646	0.3311	0.110679	0.694556	-0.0295087	0.916857	0.226805	0.416285	0.187873	0.50253	-0.948244	7.58e-08	0.176174	0.52996	0.237775	0.393468	0.171273	0.541645	0.101077	0.720024	0.0183618	0.948214	0.179015	0.523237
ENSGALG00000005657	ENSGALG00000005657	CRHR2	395105	1:4245112:4382203	blue	0.541498	0.0370874	0.573375	0.0254442	-0.608953	0.015978	0.596735	0.018855	0.213309	0.445271	-0.246728	0.375352	0.74839	0.00132981	-0.076592	0.786158	0.728837	0.00205357	0.170099	0.54446	-0.218221	0.434607	-0.0922034	0.743805	-0.114875	0.68352	-0.170756	0.542883	-0.175386	0.53183	0.883975	1.23e-05	0.105835	0.707366	-0.242276	0.384303	0.153896	0.583961	-0.196096	0.483655	0.0907377	0.747754	-0.13783	0.62424
ENSGALG00000036194	ENSGALG00000036194	NA	NA	NA:NA:NA	blue	0.540051	0.0376967	0.648326	0.00894457	-0.446605	0.0951469	0.83162	0.000121296	-0.111829	0.691526	-0.380671	0.161573	0.61342	0.0150153	-0.0532563	0.850485	0.603684	0.0171738	0.241424	0.38603	-0.192795	0.491192	-0.0212099	0.940193	0.145243	0.605522	-0.206998	0.459165	-0.119041	0.67262	0.951945	4.72e-08	-0.110599	0.694767	-0.221408	0.427757	-0.0591101	0.834251	-0.0883499	0.754201	-0.125496	0.655853	-0.10117	0.719775
ENSGALG00000006322	ENSGALG00000006322	CLCA1	424523	-1:16349218:16362800	blue	-0.540003	0.0377168	-0.51602	0.048942	0.594303	0.0194722	-0.314939	0.252901	-0.44245	0.0986401	0.392426	0.147951	-0.858478	4.2e-05	-0.00270218	0.992374	-0.658648	0.00758252	-0.125024	0.657073	0.25309	0.36276	-0.0200729	0.943395	0.360482	0.186859	0.233849	0.401557	0.222028	0.426432	-0.757752	0.00106532	-0.107036	0.704183	0.147809	0.599096	0.086148	0.760159	0.0563255	0.841966	-0.379179	0.163359	0.157151	0.575934
ENSGALG00000034132	ENSGALG00000034132	CACFD1	417151	1:7226419:7232634	blue	0.531166	0.041602	0.581166	0.0230783	-0.506595	0.0539656	0.781454	0.00058048	-0.0712644	0.800746	-0.336953	0.219405	0.599864	0.018083	-0.0985606	0.726744	0.694555	0.00406057	0.180671	0.519337	-0.30373	0.271092	0.0554274	0.844457	0.0901544	0.749328	-0.135564	0.630004	-0.228847	0.411988	0.938714	2.22e-07	-0.0216958	0.938826	-0.263622	0.342433	-0.135596	0.629921	-0.140848	0.616592	-0.151405	0.590135	0.0352527	0.90074
ENSGALG00000026182	ENSGALG00000026182	CTTNBP2NL	419870	1:3457929:3474605	blue	-0.529972	0.0421491	-0.597695	0.0186156	0.480693	0.0697095	-0.756546	0.00109677	0.0650027	0.817971	0.345054	0.207821	-0.653402	0.00825278	0.10996	0.696452	-0.65851	0.00759961	-0.205312	0.462911	0.300284	0.27684	0.0640191	0.820683	-0.0281544	0.920661	0.293134	0.288994	0.17012	0.544409	-0.971692	1.59e-09	0.0781012	0.782037	0.28731	0.299125	-0.000839201	0.997632	0.118523	0.673973	0.0942142	0.738396	0.139931	0.618912
ENSGALG00000001163	ENSGALG00000001163	NDEL1	417317	1:1701769:1724694	blue	0.529212	0.0424998	0.358817	0.189052	-0.133099	0.636296	0.39108	0.149471	-0.0582277	0.836694	0.0680864	0.809478	0.366976	0.178462	-0.13811	0.623529	0.30599	0.267363	-0.201078	0.472387	-0.350008	0.200935	-0.341349	0.21307	-0.00832998	0.976495	-0.328365	0.23212	-0.205256	0.463035	0.519536	0.0471586	-0.0616989	0.82709	-0.302753	0.272715	-0.277534	0.316591	-0.21658	0.438155	-0.0579527	0.837456	-0.265178	0.339486
ENSGALG00000044014	ENSGALG00000044014	ZNF212	420369	1:544726:552213	blue	-0.527153	0.0434613	-0.439873	0.100852	0.34148	0.212883	-0.664075	0.00693497	0.00196015	0.994468	0.291698	0.291474	-0.332024	0.226649	0.153363	0.585279	-0.665558	0.00676576	0.159629	0.569852	0.078572	0.780753	0.112279	0.69034	-0.150002	0.593626	0.0111404	0.968568	0.0206356	0.94181	-0.677683	0.00550124	-0.288286	0.297413	0.282376	0.307867	0.282359	0.307899	0.160234	0.568371	0.290892	0.29287	-0.024869	0.929898
ENSGALG00000044975	ENSGALG00000044975	KY	769840	-1:3857750:3879247	blue	0.526915	0.0435735	0.653203	0.00827899	-0.480208	0.0700321	0.685215	0.0048152	0.102721	0.715643	-0.294518	0.286617	0.590438	0.0204849	0.186309	0.506157	0.500474	0.0574242	0.11166	0.69197	-0.347847	0.203921	0.195642	0.484689	0.275458	0.320373	0.00912256	0.974259	-0.1321	0.638855	0.679104	0.00536626	-0.00485608	0.986296	-0.382281	0.15966	-0.0611508	0.828605	-0.170982	0.542341	0.0613201	0.828137	0.348001	0.203707
ENSGALG00000002610	ENSGALG00000002610		NA	1:13466193:13472225	blue	0.526053	0.0439818	0.538426	0.0383896	-0.464026	0.0814443	0.623198	0.0130644	-0.000464603	0.998689	-0.202625	0.468913	0.691146	0.00432424	-0.184138	0.511215	0.660085	0.00740655	0.143625	0.60959	-0.290007	0.294407	-0.168691	0.547845	-0.120964	0.667611	-0.261498	0.34648	-0.179467	0.522171	0.939363	2.08e-07	-0.0537473	0.849122	-0.312855	0.256225	-0.0608153	0.829533	-0.120288	0.669369	-0.0265414	0.925195	-0.185726	0.507515
ENSGALG00000034453	ENSGALG00000034453	SAMD11	419434	-1:2922203:2982448	blue	0.524877	0.0445426	0.565954	0.0278653	-0.33428	0.223314	0.692676	0.00420427	-0.100711	0.721	-0.256125	0.356835	0.670222	0.00625482	-0.177349	0.527175	0.573441	0.0254236	0.187101	0.504318	-0.260504	0.348382	-0.0537399	0.849142	-0.0323564	0.908863	-0.215204	0.441141	-0.147385	0.600156	0.954633	3.27e-08	-0.126655	0.652858	-0.271249	0.328123	-0.042464	0.880559	-0.165243	0.556175	-0.088403	0.754057	-0.0853512	0.762318
ENSGALG00000044618	ENSGALG00000044618		415531	-1:18212963:18222747	blue	-0.52373	0.0450953	-0.700563	0.00362712	0.276872	0.317794	-0.625953	0.012552	-0.0262386	0.926046	0.49745	0.0591919	-0.597812	0.0185864	-0.290961	0.29275	-0.149088	0.595904	-0.26112	0.347203	-0.127688	0.650191	-0.103983	0.712286	-0.211774	0.448632	0.131862	0.639464	0.032868	0.907428	-0.605139	0.0168369	0.308554	0.26317	-0.127279	0.651248	0.178301	0.524922	-0.0244861	0.930974	-0.238074	0.392855	0.185326	0.508445
ENSGALG00000029843	ENSGALG00000029843	NA	NA	NA:NA:NA	blue	-0.522886	0.045505	-0.544876	0.035694	0.525014	0.0444774	-0.620981	0.0134884	-0.167229	0.55137	0.510874	0.0516403	-0.668031	0.00649093	0.0801483	0.776456	-0.688927	0.00450306	-0.37299	0.17091	0.157244	0.575705	0.00844782	0.976163	0.0822566	0.770719	0.23279	0.403753	0.0982617	0.727544	-0.873406	2.11e-05	-0.0739375	0.793419	0.120399	0.66908	-0.0050097	0.985863	-0.0545141	0.846992	-0.033834	0.904718	0.173966	0.535211
ENSGALG00000015663	ENSGALG00000015663	HSDL2	100858057	1:66228725:66241158	blue	0.520906	0.0464774	0.427051	0.112372	-0.358845	0.189015	0.590968	0.0203437	-0.0765544	0.786261	-0.191645	0.493829	0.567607	0.0273113	-0.193857	0.488761	0.595189	0.0192455	0.0211865	0.940259	-0.469709	0.0772954	0.00399855	0.988716	-0.075665	0.788692	-0.30584	0.26761	-0.34226	0.211771	0.848602	6.35e-05	-0.0546516	0.84661	-0.316554	0.250344	-0.0922296	0.743734	-0.249595	0.369648	-0.118015	0.6753	-0.0274742	0.922573
ENSGALG00000030852	ENSGALG00000030852		NA	-1:1638657:1663714	blue	0.520252	0.0468016	0.659378	0.00749277	-0.468353	0.0782713	0.777985	0.000637258	-0.0482339	0.864459	-0.398604	0.141111	0.660751	0.00732611	-0.0388678	0.890615	0.603159	0.0172966	0.322105	0.241672	-0.172793	0.538008	-0.0712351	0.800827	0.0924133	0.743239	-0.17905	0.523154	-0.0853055	0.762442	0.941287	1.69e-07	-0.106775	0.704876	-0.23456	0.400086	-0.0413821	0.883583	-0.00780483	0.977977	-0.0486214	0.86338	-0.11997	0.670197
ENSGALG00000014901	ENSGALG00000014901	METTL16	431184	1:80198363:80208691	blue	-0.519053	0.047401	-0.528041	0.0430446	0.514631	0.0496598	-0.486736	0.0657722	-0.0942512	0.738297	0.19038	0.496741	-0.648297	0.00894869	0.0579785	0.837384	-0.568871	0.0268937	0.0773196	0.784171	0.485741	0.0664088	0.114942	0.683343	0.0672359	0.811818	0.168107	0.549253	0.350069	0.200851	-0.742436	0.00152392	-0.0409706	0.884733	0.28156	0.309327	0.0851274	0.762925	0.475691	0.0730942	-0.0582031	0.836762	0.0930798	0.741446
ENSGALG00000038727	ENSGALG00000038727		NA	-1:2484038:2494920	blue	0.514639	0.0496553	0.624341	0.0128498	-0.558263	0.0305539	0.748385	0.00132997	-0.0992862	0.724804	-0.152324	0.587854	0.564072	0.0285058	0.00897113	0.974687	0.507427	0.0535077	-0.0736346	0.794248	-0.1806	0.519505	-0.0110803	0.968738	0.19745	0.480579	-0.137517	0.625033	-0.098056	0.728094	0.808772	0.000261573	-0.114029	0.68574	-0.234677	0.399844	-0.115744	0.681242	-0.405385	0.133852	-0.0718621	0.799107	-0.0525617	0.852416
ENSGALG00000015438	ENSGALG00000015438	MPZL1	NA	-1:92933089:92944816	blue	-0.512041	0.0510186	-0.635363	0.0109183	0.526221	0.0439019	-0.595151	0.0192553	-0.164398	0.558224	0.399193	0.14047	-0.802499	0.000317454	0.00340233	0.990399	-0.633708	0.0111929	-0.209236	0.454214	0.215209	0.44113	-0.0539083	0.848674	0.101167	0.719784	0.166189	0.553885	0.149222	0.59557	-0.899908	4.9e-06	0.0239079	0.932601	0.179705	0.521611	-0.00920033	0.97404	0.140374	0.617792	-0.153256	0.585544	0.0800271	0.776787
ENSGALG00000033583	ENSGALG00000033583	NA	NA	NA:NA:NA	blue	-0.511638	0.0512327	-0.507754	0.0533284	0.327949	0.232747	-0.552523	0.0326843	-0.170009	0.544676	0.55252	0.0326855	-0.510595	0.0517892	0.0107239	0.969743	-0.577568	0.024149	-0.135574	0.629977	0.0786782	0.780463	0.275374	0.320527	0.00688817	0.980563	0.239421	0.390104	0.0432119	0.878469	-0.678071	0.00546413	-0.200856	0.472886	0.256025	0.35703	-0.100565	0.72139	-0.085414	0.762148	-0.00342411	0.990337	0.25827	0.352681
ENSGALG00000000668	ENSGALG00000000668	RBBP5	419826	-1:2014218:2023555	blue	0.508264	0.0530494	0.653245	0.0082735	-0.522277	0.0458027	0.581537	0.0229698	0.103299	0.714106	-0.319498	0.245721	0.8589	4.12e-05	-0.0343317	0.903323	0.579989	0.0234244	0.244702	0.379412	-0.221302	0.427986	-0.00465107	0.986875	-0.145448	0.605009	-0.158611	0.572346	-0.144328	0.607821	0.940639	1.82e-07	-0.150123	0.593323	-0.217051	0.437137	-0.0547313	0.846389	-0.129154	0.646418	0.191944	0.493142	-0.0983854	0.727213
ENSGALG00000031001	ENSGALG00000031001	NA	NA	NA:NA:NA	blue	0.507983	0.053203	0.528442	0.0428574	-0.475459	0.0732539	0.634411	0.0110757	0.0244522	0.93107	-0.156907	0.576533	0.580668	0.0232242	-0.163795	0.55969	0.670176	0.00625972	0.113559	0.686975	-0.231433	0.406578	-0.388996	0.151843	-0.0402537	0.886738	-0.326614	0.234768	-0.0988531	0.725962	0.861433	3.69e-05	0.0513066	0.855905	-0.337669	0.218365	0.0857759	0.761167	-0.0891308	0.752091	-0.0799784	0.776919	-0.371544	0.172705
ENSGALG00000008784	ENSGALG00000008784		NA	-1:16953648:16965095	blue	0.502315	0.0563676	0.603352	0.0172515	-0.445007	0.0964795	0.785484	0.000519757	-0.116906	0.678198	-0.3156	0.251851	0.631862	0.0115055	-0.122156	0.664511	0.630673	0.0117104	0.254327	0.360337	-0.206561	0.460134	-0.0176346	0.950262	0.0643015	0.819905	-0.187398	0.50363	-0.135666	0.629742	0.975258	6.68e-10	-0.111804	0.69159	-0.219861	0.431075	-0.0497108	0.860346	-0.104068	0.71206	-0.131922	0.63931	-0.0948436	0.736705
ENSGALG00000012281	ENSGALG00000012281	PLA2G6	418028	1:50979471:50998677	blue	0.501352	0.0569183	0.518825	0.0475156	-0.458272	0.0858033	0.708473	0.00311342	-0.0213007	0.939938	-0.302176	0.273676	0.627775	0.0122218	-0.217847	0.435414	0.73915	0.00164048	0.207633	0.457757	-0.208426	0.456001	0.0121834	0.965627	-0.05505	0.845505	-0.199047	0.476966	-0.126816	0.652443	0.975644	6.04e-10	0.0302198	0.91486	-0.197069	0.481445	-0.0637189	0.821512	-0.108254	0.70096	-0.151939	0.58881	-0.0976825	0.729094
ENSGALG00000016332	ENSGALG00000016332	MCPH1	100125976	-1:88558041:88679655	blue	0.499131	0.0582045	0.632848	0.0113377	-0.419651	0.119419	0.792212	0.00042997	-0.164975	0.556825	-0.337024	0.219301	0.623815	0.0129484	-0.0561756	0.842382	0.513424	0.0502898	0.199186	0.476652	-0.14127	0.615527	-0.019776	0.944231	0.118805	0.673236	-0.182395	0.51529	-0.0945754	0.737426	0.930944	4.74e-07	-0.198447	0.478322	-0.215324	0.440882	-0.0446076	0.874572	-0.15285	0.58655	-0.0933633	0.740683	-0.0944386	0.737793
ENSGALG00000010692	ENSGALG00000010692	LRP8	396102	-1:25016404:25163464	blue	0.497738	0.0590218	0.575649	0.0247355	-0.175035	0.532665	0.515696	0.0491085	-0.0570253	0.840026	-0.0375662	0.894259	0.685524	0.00478855	-0.0694052	0.805852	0.324375	0.238181	0.0249121	0.929776	-0.151548	0.58978	-0.234796	0.399598	-0.0709976	0.801479	-0.124073	0.659537	-0.198647	0.477869	0.762186	0.00095586	-0.208593	0.455633	-0.208757	0.455271	0.0558563	0.843267	-0.307959	0.26414	0.0973779	0.729909	-0.211937	0.448273
ENSGALG00000036949	ENSGALG00000036949	ASAP3	429809	-1:2336751:2352001	blue	0.496893	0.0595216	0.596475	0.0189204	-0.400805	0.138726	0.716375	0.00266002	-0.0929999	0.741661	-0.272852	0.325158	0.700108	0.00365854	-0.140734	0.61688	0.5886	0.0209803	0.259045	0.351187	-0.231537	0.40636	-0.0388228	0.890741	-0.0234366	0.933927	-0.19945	0.476055	-0.157347	0.57545	0.97974	1.84e-10	-0.153001	0.586176	-0.230849	0.407795	0.01632	0.953966	-0.146177	0.603181	-0.0587967	0.835118	-0.110683	0.694544
ENSGALG00000004514	ENSGALG00000004514	PDE6G	395091	1:9141163:9143240	blue	0.494357	0.0610396	0.575464	0.0247927	-0.498257	0.0587161	0.69931	0.00371426	-0.0161756	0.954373	-0.195132	0.485849	0.67421	0.00584257	-0.126928	0.652153	0.672344	0.00603268	0.200062	0.474675	-0.25228	0.36435	-0.00908566	0.974363	-0.0194804	0.945063	-0.213708	0.444402	-0.156912	0.576519	0.952776	4.23e-08	-0.0703756	0.803186	-0.224342	0.4215	-0.0370056	0.895829	-0.130387	0.643247	-0.0558242	0.843356	-0.111442	0.692546
ENSGALG00000026578	ENSGALG00000026578	LOC769510	769510	-1:2365901:2379396	blue	-0.494284	0.061084	-0.49801	0.0588613	0.364254	0.181951	-0.52216	0.0458598	-0.0372304	0.8952	0.463188	0.0820692	-0.51009	0.0520604	0.0605516	0.830262	-0.501289	0.0569551	-0.0677525	0.810397	-0.0147641	0.958351	-0.0268098	0.92444	0.0221822	0.937457	0.0239719	0.932421	-0.010584	0.970137	-0.68937	0.00446689	0.00651399	0.981618	0.0771509	0.784631	0.679913	0.00529055	-0.122693	0.663115	0.0023821	0.993278	0.04914	0.861935
ENSGALG00000032420	ENSGALG00000032420	DPAGT1	419699	1:59463:64835	blue	0.493396	0.0616223	0.494647	0.0608646	-0.541402	0.0371274	0.58373	0.0223374	0.0932254	0.741054	-0.374501	0.169045	0.71168	0.00292253	-0.167605	0.550465	0.724627	0.00224449	0.255106	0.358819	-0.408999	0.130089	0.14041	0.617699	-0.147433	0.600037	-0.199473	0.476002	-0.264122	0.341485	0.929974	5.18e-07	0.0316774	0.910768	-0.201863	0.470623	-0.0408128	0.885174	-0.201796	0.470773	-0.0109926	0.968985	0.0184069	0.948087
ENSGALG00000033835	ENSGALG00000033835	NA	NA	NA:NA:NA	blue	0.492803	0.061984	0.531953	0.0412444	-0.436322	0.103955	0.675452	0.0057186	-0.0425946	0.880194	-0.360365	0.187013	0.653036	0.00830118	-0.201158	0.472207	0.657556	0.00771836	0.292035	0.290891	-0.169364	0.546228	0.0326851	0.907941	-0.0732917	0.795188	-0.145428	0.605059	-0.101234	0.719605	0.959441	1.6e-08	-0.060248	0.831102	-0.158402	0.57286	-0.191004	0.495303	-0.039537	0.888743	-0.0959732	0.733674	-0.0724542	0.797483
ENSGALG00000029287	ENSGALG00000029287	TMEM67	420224	1:125754778:125783224	blue	-0.492774	0.0620016	-0.494262	0.0610971	0.625137	0.0127022	-0.629074	0.0119905	-0.111039	0.693607	0.28951	0.295273	-0.643423	0.00965513	0.175156	0.532378	-0.780085	0.000602374	-0.10136	0.71927	0.183672	0.512303	-0.0760254	0.787707	0.105983	0.706975	0.208739	0.45531	0.137544	0.624966	-0.915368	1.71e-06	-0.117444	0.676792	0.0926671	0.742556	0.0648606	0.818362	0.244772	0.379271	0.0661776	0.814733	0.150217	0.59309
ENSGALG00000007961	ENSGALG00000007961	ARMC7	422118	1:10653105:10655190	blue	0.491919	0.0625259	0.581253	0.0230527	-0.443038	0.0981405	0.686256	0.00472598	-0.0570806	0.839873	-0.287806	0.298254	0.681503	0.00514429	-0.139186	0.6208	0.632054	0.0114727	0.241125	0.386636	-0.23991	0.389106	-0.0941654	0.738527	-0.0472998	0.867063	-0.243834	0.381157	-0.11002	0.696293	0.963062	8.78e-09	-0.123864	0.660077	-0.289307	0.295629	-0.109805	0.696861	-0.00486664	0.986267	-0.0438916	0.876571	-0.142182	0.613225
ENSGALG00000003297	ENSGALG00000003297	HDAC1	373961	-1:5272426:5285757	blue	0.491133	0.0630105	0.503793	0.0555297	-0.392403	0.147977	0.577375	0.0242074	0.0658737	0.81557	-0.364435	0.181718	0.70125	0.00357996	-0.224331	0.421524	0.687049	0.0046589	0.2152	0.44115	-0.139756	0.619354	-0.116589	0.679029	-0.199923	0.474988	-0.183118	0.513598	-0.0876518	0.756089	0.935654	3.03e-07	0.0457502	0.871384	-0.231912	0.405579	-0.00580061	0.983631	-0.0436086	0.877361	-0.0241841	0.931824	-0.164136	0.55886
ENSGALG00000043623	ENSGALG00000043623	ARL14	101749876	1:22259518:22261234	blue	0.489497	0.0640284	0.589259	0.0208015	-0.446763	0.0950156	0.63017	0.011798	0.0457859	0.871284	-0.348803	0.202596	0.627189	0.0123273	-0.0494941	0.860949	0.556118	0.0313374	0.213922	0.443934	0.0405371	0.885945	-0.100748	0.720901	0.0148025	0.958243	0.0635983	0.821845	0.0287769	0.918913	0.798521	0.000357685	-0.0144532	0.959228	-0.236898	0.395268	-0.220032	0.430709	0.0490274	0.862249	0.0222218	0.937345	0.00277848	0.992159
ENSGALG00000029760	ENSGALG00000029760	NRBP2	776552	-1:149468979:149495570	blue	0.48794	0.0650074	0.581365	0.0230198	-0.349021	0.202295	0.743148	0.00149957	-0.0113222	0.968056	-0.297222	0.282007	0.598283	0.01847	-0.0448522	0.873889	0.554824	0.0318174	0.371425	0.172855	-0.0208682	0.941155	0.101431	0.71908	0.0980999	0.727977	-0.0795386	0.778118	-0.0622246	0.825638	0.862695	3.48e-05	-0.0756406	0.788759	-0.0868702	0.758203	0.0440698	0.876074	0.0338876	0.904568	-0.0626515	0.824459	-0.0163637	0.953843
ENSGALG00000040269	ENSGALG00000040269		NA	1:6483833:6496693	blue	0.485939	0.0662822	0.356602	0.191997	-0.466911	0.0793186	0.472083	0.075608	0.168206	0.549015	-0.419659	0.119411	0.571143	0.026155	-0.267783	0.334582	0.76686	0.000850535	0.108683	0.699827	-0.368803	0.176145	-0.110422	0.695234	-0.23808	0.392843	-0.528434	0.0428611	-0.0217318	0.938724	0.841294	8.46e-05	0.190802	0.495767	-0.334014	0.223706	-0.0178	0.949796	0.015143	0.957283	-0.0659212	0.815439	-0.254323	0.360347
ENSGALG00000009467	ENSGALG00000009467	RBM48	420555	1:22674892:22680498	blue	-0.484448	0.0672437	-0.577158	0.0242735	0.43509	0.105048	-0.281726	0.30903	-0.324273	0.238338	0.144109	0.608371	-0.870977	2.37e-05	-0.00192298	0.994573	-0.431888	0.107924	-0.221237	0.428125	0.0452832	0.872687	0.0852639	0.762555	0.313924	0.254517	-0.0523044	0.853131	0.177305	0.527279	-0.699124	0.00372739	0.0773999	0.783952	-0.0189394	0.946587	0.162642	0.562494	0.147784	0.599158	-0.417334	0.121688	0.195341	0.485373
ENSGALG00000007668	ENSGALG00000007668	BMP7	395494	1:11682314:11723878	blue	0.484276	0.067355	0.4583	0.0857822	-0.399291	0.140364	0.682129	0.00508758	-0.0370167	0.895798	-0.306689	0.266216	0.501998	0.0565484	-0.22218	0.426108	0.747588	0.00135471	0.0537931	0.848994	-0.233239	0.402821	-0.177016	0.527962	-0.0221197	0.937633	-0.27584	0.319676	-0.10345	0.713703	0.887643	1.01e-05	0.133629	0.63494	-0.350859	0.199766	-0.0162003	0.954304	-0.0488787	0.862663	-0.225377	0.419306	-0.161163	0.5661
ENSGALG00000002775	ENSGALG00000002775	FA2H	415687	-1:1892371:1901853	blue	0.483899	0.0675999	0.567992	0.0271837	-0.49527	0.0604898	0.708447	0.00311503	-0.0437039	0.877095	-0.403564	0.135776	0.659288	0.0075037	-0.0919657	0.744445	0.632515	0.0113942	0.207896	0.457175	-0.28229	0.308022	0.11308	0.688233	-0.0053752	0.984832	-0.328591	0.231781	-0.133226	0.635973	0.953247	3.96e-08	-0.111084	0.693489	-0.180196	0.520456	-0.0654809	0.816652	-0.121565	0.666046	-0.0549864	0.845681	-0.111061	0.693548
ENSGALG00000006539	ENSGALG00000006539	C9H21orf2	424866	-1:4551856:4565071	blue	0.483659	0.067756	0.526877	0.0435915	-0.444143	0.0972062	0.65741	0.00773666	-0.0160295	0.954785	-0.37045	0.174073	0.674488	0.00581465	-0.213582	0.444676	0.691048	0.00433201	0.230832	0.407832	-0.187107	0.504304	-0.0428315	0.879532	-0.111597	0.692137	-0.211194	0.449904	-0.0491074	0.862026	0.973287	1.09e-09	-0.0218208	0.938474	-0.272429	0.325939	-0.090921	0.74726	-0.0302683	0.914724	-0.0817969	0.771969	-0.0954881	0.734975
ENSGALG00000004144	ENSGALG00000004144	DDX21	768898	1:11485483:11498075	blue	-0.483534	0.0678376	-0.437728	0.102719	0.302952	0.272383	-0.577332	0.0242207	0.115508	0.68186	0.0834828	0.767388	-0.588764	0.0209358	0.2833	0.306219	-0.576965	0.0243323	-0.201886	0.470571	0.236661	0.395755	0.00502917	0.985808	0.118974	0.672796	-0.0627151	0.824283	0.346073	0.206393	-0.868442	2.68e-05	0.0756569	0.788714	0.100643	0.72118	0.282451	0.307734	0.225094	0.419905	0.146024	0.603563	-0.0110457	0.968835
ENSGALG00000000695	ENSGALG00000000695	MFSD4A	419831	1:2178133:2192431	blue	0.483508	0.0678549	0.623402	0.0130259	-0.475793	0.0730241	0.571473	0.0260489	0.0816436	0.772386	-0.297311	0.281856	0.846699	6.85e-05	-0.0745879	0.791638	0.579592	0.023542	0.284739	0.303663	-0.192914	0.490918	4.42e-05	0.999875	-0.172618	0.538426	-0.138916	0.621482	-0.146005	0.603612	0.94892	6.98e-08	-0.154779	0.58178	-0.191846	0.493367	-0.0313002	0.911827	-0.0997359	0.723603	0.16559	0.555334	-0.0994572	0.724347
ENSGALG00000034085	ENSGALG00000034085	DDEFL1	769389	1:1160252:1181245	blue	-0.482132	0.0687567	-0.481027	0.0694872	0.258421	0.35239	-0.594654	0.0193821	0.146853	0.601487	0.43232	0.107533	-0.466975	0.0792716	0.135473	0.630235	-0.449678	0.0926195	-0.106133	0.706577	0.141324	0.615391	0.0114719	0.967633	-0.032218	0.909251	0.130316	0.64343	0.0256484	0.927706	-0.753651	0.00117537	0.123968	0.659807	0.192576	0.491692	0.60575	0.016697	-0.0784749	0.781018	0.127622	0.650363	0.031406	0.91153
ENSGALG00000046235	ENSGALG00000046235	LOC420294	420294	1:148842604:148854807	blue	-0.481897	0.0689118	-0.407328	0.13182	0.469018	0.0777917	-0.434181	0.105858	-0.19502	0.486104	0.354005	0.195485	-0.512925	0.0505519	-0.0620365	0.826157	-0.491486	0.0627926	0.0726652	0.796905	0.20036	0.474002	-0.427477	0.111975	0.00427784	0.987928	-0.132933	0.636723	0.415109	0.123892	-0.541418	0.0371207	-0.14359	0.609677	-0.103134	0.714544	0.223737	0.422787	0.463804	0.0816089	-0.0707726	0.802096	-0.251912	0.365073
ENSGALG00000031471	ENSGALG00000031471	NA	NA	NA:NA:NA	blue	0.478713	0.0710351	0.703667	0.00341802	-0.529522	0.0423567	0.682902	0.00501825	0.209948	0.452643	-0.577482	0.024175	0.60383	0.0171397	0.296293	0.283586	0.481841	0.0689486	0.206998	0.459165	0.0438772	0.876611	0.0635774	0.821902	0.24315	0.382537	-0.125448	0.655977	0.175665	0.531167	0.65884	0.00755879	0.0104201	0.9706	-0.279022	0.313895	0.0276762	0.922005	0.188439	0.50122	0.187244	0.503987	0.0472789	0.867121
ENSGALG00000006351	ENSGALG00000006351	FAS	395274	1:20087175:20099497	blue	-0.477481	0.0718699	-0.333974	0.223765	0.267111	0.335844	-0.490478	0.0634165	0.200397	0.473919	-0.0383995	0.891926	-0.383419	0.158317	0.197029	0.481534	-0.407997	0.131125	0.217278	0.436645	0.549123	0.0339977	0.185973	0.506939	-0.0133039	0.962468	0.229453	0.410715	0.420334	0.118756	-0.639097	0.0103181	0.0821168	0.771099	0.401701	0.137763	0.151286	0.590431	0.474494	0.0739214	0.186517	0.505676	0.0234897	0.933777
ENSGALG00000013993	ENSGALG00000013993	VNN1	421702	1:56889501:56916337	blue	0.477226	0.072043	0.530855	0.0417439	-0.401096	0.138412	0.627333	0.0123012	-0.00579719	0.983641	-0.373536	0.170234	0.634537	0.0110548	-0.137453	0.625198	0.642172	0.00984332	0.175099	0.532513	-0.402355	0.137064	-0.0530423	0.85108	-0.0431073	0.878761	-0.381973	0.160024	-0.058227	0.836696	0.905592	3.4e-06	-0.0373873	0.89476	-0.401053	0.13846	-0.0513431	0.855804	-0.0179659	0.949329	-0.0592748	0.833795	-0.0884998	0.753796
ENSGALG00000031565	ENSGALG00000031565	NEBL	395148	1:18282264:18339795	blue	0.476614	0.0724611	0.537021	0.0389963	-0.301265	0.275197	0.802055	0.000321752	-0.15142	0.590097	-0.316889	0.249814	0.461439	0.0833842	-0.100252	0.722225	0.557963	0.0306623	0.29645	0.283318	-0.00238638	0.993266	0.0256943	0.927577	0.182841	0.514246	0.00432028	0.987808	-0.0600601	0.831622	0.839311	9.13e-05	-0.0533815	0.850137	-0.175619	0.531277	-0.120559	0.668664	0.0768445	0.785469	-0.225869	0.418264	0.0565405	0.84137
ENSGALG00000003885	ENSGALG00000003885	KIAA1614	424414	-1:6204758:6208758	blue	0.476118	0.0728009	0.464839	0.0808412	-0.485326	0.0666764	0.730052	0.00200096	0.0280504	0.920954	-0.408431	0.130676	0.421317	0.117807	-0.115175	0.682733	0.745731	0.00141387	0.16002	0.568895	-0.143454	0.61002	0.0943227	0.738104	0.106564	0.705435	-0.30434	0.270083	-0.020379	0.942533	0.824265	0.00015717	0.15039	0.592659	-0.111101	0.693444	-0.151232	0.590566	0.0533035	0.850354	-0.225732	0.418553	-0.139955	0.618851
ENSGALG00000000535	ENSGALG00000000535	ERRFI1	419364	1:255925:259437	blue	-0.474881	0.0736532	-0.573058	0.0255443	0.403517	0.135825	-0.695598	0.00398251	0.0508631	0.857139	0.170713	0.542987	-0.460034	0.0844513	-0.142666	0.612003	-0.451298	0.0913062	0.123868	0.660068	0.222989	0.424381	0.0412179	0.884042	-0.27572	0.319894	0.105788	0.707492	0.112686	0.689271	-0.64215	0.00984667	0.0499812	0.859593	0.490977	0.0631072	-0.00567715	0.98398	0.128507	0.648082	0.0376909	0.89391	-0.168786	0.547617
ENSGALG00000003851	ENSGALG00000003851	TRIT1	419678	-1:5664869:5678872	blue	0.474683	0.0737905	0.521559	0.0461548	-0.501778	0.0566743	0.553167	0.0324401	0.155794	0.579274	-0.272792	0.32527	0.769165	0.000802164	-0.1408	0.616714	0.714076	0.00278609	0.238616	0.391746	-0.248734	0.371357	0.17959	0.521881	-0.1638	0.559676	0.0288197	0.918792	-0.173134	0.537195	0.903969	3.78e-06	0.0549818	0.845694	-0.251952	0.364994	-0.0462407	0.870016	-0.145369	0.605207	0.0600395	0.831678	0.203296	0.467411
ENSGALG00000011659	ENSGALG00000011659	ACAT2	421587	-1:45699532:45707626	blue	-0.474068	0.0742177	-0.40914	0.129944	0.311511	0.258382	-0.351183	0.199322	-0.00659238	0.981397	0.136143	0.628527	-0.466538	0.0795911	0.0587744	0.83518	-0.268741	0.33279	0.0271129	0.923588	0.11093	0.693893	0.306605	0.266354	0.0863811	0.759528	-0.0141741	0.960014	0.408513	0.130591	-0.50417	0.0553172	0.049039	0.862216	-0.0659758	0.815289	0.159902	0.569183	0.442226	0.0988313	-0.0711478	0.801066	0.341253	0.213208
ENSGALG00000035594	ENSGALG00000035594	MYH7	395350	-1:56925:70995	blue	0.473962	0.0742912	0.528405	0.0428746	-0.211908	0.448338	0.821888	0.000170471	-0.239008	0.390946	-0.399967	0.13963	0.34623	0.206174	-0.124314	0.658912	0.492254	0.0623203	0.063998	0.820742	0.0368905	0.896152	-0.127529	0.650603	0.259358	0.350584	-0.240801	0.387294	0.200224	0.474309	0.800367	0.000338525	-0.0401576	0.887007	-0.289999	0.294422	-0.165829	0.554755	0.0621215	0.825923	-0.322064	0.241736	-0.122646	0.663238
ENSGALG00000030785	ENSGALG00000030785	NA	NA	NA:NA:NA	blue	0.473874	0.0743527	0.398419	0.141313	-0.600022	0.0180448	0.569871	0.0265666	0.0568877	0.840407	-0.254299	0.360393	0.546577	0.0350073	-0.26859	0.333071	0.801072	0.000331438	0.0704977	0.802851	-0.310577	0.259888	-0.0349448	0.901604	-0.13374	0.634658	-0.221558	0.427437	-0.142559	0.612274	0.870658	2.41e-05	0.14817	0.598193	-0.254299	0.360393	-0.243137	0.382563	-0.142358	0.61278	-0.151157	0.590751	-0.096114	0.733296
ENSGALG00000032542	ENSGALG00000032542	NA	NA	NA:NA:NA	blue	0.472608	0.0752384	0.563786	0.0286041	-0.403591	0.135747	0.716499	0.00265334	-0.0846795	0.76414	-0.279879	0.312349	0.66621	0.00669242	-0.186777	0.505071	0.633203	0.0112778	0.26102	0.347394	-0.129148	0.646433	-0.0243586	0.931333	-0.0401507	0.887026	-0.155018	0.581188	-0.0853239	0.762392	0.982349	7.57e-11	-0.0943693	0.737979	-0.187543	0.503295	-0.0187109	0.94723	-0.100571	0.721372	-0.105261	0.708891	-0.113775	0.686407
ENSGALG00000041872	ENSGALG00000041872	NA	NA	NA:NA:NA	blue	0.470274	0.0768911	0.448466	0.0936105	-0.224562	0.421035	0.770856	0.000768122	-0.251724	0.365443	-0.340528	0.214244	0.346266	0.206124	-0.243525	0.381781	0.580169	0.0233713	0.150947	0.591273	-0.100519	0.721513	-0.13841	0.622765	0.129399	0.645788	-0.215418	0.440677	-0.0870178	0.757804	0.847363	6.67e-05	-0.00424533	0.98802	-0.133042	0.636443	-0.205931	0.461534	-0.0243822	0.931267	-0.379793	0.162623	-0.222751	0.424888
ENSGALG00000044564	ENSGALG00000044564	NA	NA	NA:NA:NA	blue	0.469975	0.077105	0.544376	0.0358977	-0.417893	0.121137	0.686824	0.00467786	-0.0560068	0.84285	-0.3129	0.256152	0.68255	0.00504971	-0.19874	0.477658	0.666992	0.00660532	0.24035	0.38821	-0.183577	0.512525	0.0347029	0.902282	-0.0791354	0.779217	-0.165056	0.556629	-0.0928725	0.742004	0.988037	6.12e-12	-0.0704292	0.803039	-0.219109	0.432692	-0.073269	0.79525	-0.0864863	0.759243	-0.0932286	0.741046	-0.0519612	0.854085
ENSGALG00000012095	ENSGALG00000012095		NA	1:55690420:55695393	blue	0.468874	0.0778951	0.761535	0.000971345	-0.366131	0.179541	0.708304	0.00312375	-0.0424586	0.880574	-0.431627	0.108161	0.712892	0.00285286	0.139147	0.620899	0.364713	0.181359	0.203566	0.466807	0.0355211	0.899988	-0.157596	0.574839	0.143421	0.610102	-0.185245	0.508633	0.206961	0.459247	0.829181	0.000132357	-0.270321	0.329845	-0.347079	0.204989	-0.0732145	0.795399	0.120593	0.668575	0.152163	0.588254	-0.132057	0.638965
ENSGALG00000021353	ENSGALG00000021353	CD72AGL	768355	1:9061604:9064699	blue	0.46877	0.0779703	0.547674	0.0345695	-0.354745	0.194487	0.667416	0.00655847	-0.0944485	0.737767	-0.137924	0.623999	0.640319	0.0101274	-0.14902	0.596073	0.577043	0.0243083	0.237035	0.394987	-0.30319	0.271989	-0.103106	0.714617	-0.030141	0.915081	-0.253779	0.36141	-0.245547	0.377715	0.924556	8.29e-07	-0.142399	0.612676	-0.202895	0.46831	0.052858	0.851592	-0.146741	0.601768	-0.076628	0.78606	-0.202519	0.469151
ENSGALG00000002318	ENSGALG00000002318	LVRN	431649	-1:73044444:73078736	blue	0.46862	0.0780781	0.626395	0.0124712	-0.331293	0.227736	0.869826	2.51e-05	-0.3329	0.225351	-0.297817	0.280998	0.459027	0.0852224	0.00491214	0.986138	0.399958	0.139641	0.224357	0.42147	-0.142728	0.611847	0.00796583	0.977522	0.305218	0.268633	-0.0920696	0.744165	-0.220976	0.428683	0.84625	6.97e-05	-0.287043	0.299594	-0.104996	0.709595	-0.173798	0.53561	-0.148744	0.59676	-0.215919	0.439588	-0.0719832	0.798775
ENSGALG00000040498	ENSGALG00000040498	SLC26A8	771137	-1:130061:146496	blue	-0.467256	0.0790669	-0.437367	0.103036	0.391059	0.149494	-0.232057	0.405276	-0.29606	0.283983	0.210167	0.452161	-0.70442	0.00336883	0.103284	0.714145	-0.452397	0.0904229	-0.137893	0.62408	-0.000945962	0.99733	0.269593	0.331201	0.377802	0.16502	0.198805	0.477511	0.181863	0.516538	-0.643104	0.00970285	-0.024458	0.931053	-0.135012	0.63141	0.105087	0.709352	0.125795	0.655081	-0.294442	0.286748	0.552939	0.0325264
ENSGALG00000012966	ENSGALG00000012966	ZBTB2	421635	-1:48961177:48969226	blue	0.466033	0.0799611	0.436711	0.103612	-0.356736	0.191817	0.677395	0.00552894	0.0352674	0.900699	-0.241929	0.385007	0.466426	0.0796733	-0.230082	0.4094	0.742511	0.00152135	0.195758	0.484423	-0.0523655	0.852961	0.0451935	0.872937	0.0424066	0.880719	0.0483146	0.864234	0.0168481	0.952478	0.818691	0.000189808	0.218648	0.433686	-0.23618	0.396745	-0.100537	0.721464	0.00367382	0.989632	-0.247682	0.373448	0.134399	0.632975
ENSGALG00000002551	ENSGALG00000002551	CFAP70	769473	1:13473277:13496508	blue	0.464698	0.0809454	0.588741	0.0209418	-0.457275	0.0865755	0.735593	0.00177458	-0.104103	0.711966	-0.259743	0.349843	0.672414	0.00602554	-0.131872	0.639438	0.607691	0.0162583	0.299472	0.278204	-0.185479	0.508089	0.0808441	0.774562	0.0128957	0.963618	-0.0925627	0.742837	-0.169812	0.54515	0.971835	1.54e-09	-0.151587	0.589684	-0.132227	0.638528	-0.0804103	0.775743	-0.154457	0.582574	-0.086357	0.759593	-0.0349759	0.901517
ENSGALG00000010977	ENSGALG00000010977	FAM221A	420620	1:31327774:31334403	blue	0.46454	0.0810622	0.568473	0.0270248	-0.521677	0.0460968	0.62527	0.0126776	0.0314861	0.911305	-0.453329	0.0896786	0.647525	0.00905784	-0.0392531	0.889537	0.631457	0.011575	0.137259	0.625689	-0.176628	0.528883	-0.0295615	0.916709	-0.0267383	0.924641	-0.104235	0.711614	-0.0823695	0.770412	0.848854	6.28e-05	-0.0177119	0.950044	-0.328007	0.23266	-0.2053	0.462938	0.0124883	0.964767	0.0166862	0.952934	0.0143717	0.959457
ENSGALG00000043373	ENSGALG00000043373	ARVCF	395119	-1:1353112:1541582	blue	0.46451	0.0810846	0.522105	0.0458868	-0.389062	0.151767	0.69582	0.00396603	-0.105899	0.707197	-0.290915	0.29283	0.638828	0.0103604	-0.233915	0.401421	0.650873	0.00859191	0.275156	0.320926	-0.156306	0.578013	-0.00740687	0.979099	-0.0742038	0.79269	-0.155139	0.58089	-0.126665	0.652831	0.984836	2.84e-11	-0.0879532	0.755273	-0.152553	0.587287	-0.110982	0.693756	-0.0769662	0.785136	-0.142037	0.61359	-0.119961	0.670222
ENSGALG00000015677	ENSGALG00000015677	SUSD1	427334	1:66362196:66399087	blue	-0.463037	0.0821821	-0.539506	0.0379277	0.404074	0.135235	-0.707763	0.00315704	0.154257	0.583068	0.226005	0.417976	-0.648144	0.00897017	0.17148	0.541149	-0.599617	0.018143	-0.24306	0.382719	0.348715	0.202717	-0.0290535	0.918136	0.0176376	0.950254	0.212925	0.446112	0.24494	0.378934	-0.972344	1.37e-09	0.177676	0.5264	0.25347	0.362015	0.0472425	0.867222	0.16459	0.55776	0.118167	0.674901	0.0384354	0.891826
ENSGALG00000002507	ENSGALG00000002507	MBL2	374267	-1:5216200:5224380	blue	0.462772	0.0823803	0.576057	0.0246099	-0.663014	0.00705797	0.602113	0.0175434	0.200133	0.474514	-0.610666	0.0156033	0.564925	0.028214	0.115776	0.681157	0.62226	0.0132425	0.237296	0.394451	-0.130656	0.642558	-0.00176549	0.995018	0.0589053	0.834818	-0.400331	0.139237	0.0885906	0.75355	0.733344	0.00186383	0.0361354	0.898267	-0.168887	0.547373	-0.190117	0.497346	0.22427	0.421654	0.112106	0.690797	-0.250362	0.368129
ENSGALG00000034948	ENSGALG00000034948	UAP1L1	417295	-1:719281:734578	blue	0.462701	0.0824332	0.53908	0.0381093	-0.428031	0.11146	0.680387	0.00524666	-0.064224	0.820118	-0.256638	0.355839	0.680669	0.00522064	-0.204641	0.464407	0.632357	0.011421	0.244774	0.379267	-0.139946	0.618874	0.039394	0.889143	-0.0775719	0.783482	-0.140684	0.617007	-0.102214	0.716994	0.975558	6.18e-10	-0.0902556	0.749055	-0.142734	0.611833	-0.0222287	0.937326	-0.176033	0.530293	-0.0880483	0.755016	-0.0902712	0.749013
ENSGALG00000005079	ENSGALG00000005079	VCL	396422	-1:16242475:16296001	blue	-0.461836	0.0830841	-0.652858	0.00832485	0.358604	0.189334	-0.537863	0.0386318	-0.178872	0.523575	0.211489	0.449255	-0.742739	0.00151353	-0.169204	0.546611	-0.394024	0.146161	-0.274965	0.321276	0.258043	0.353119	0.0713049	0.800635	-0.0518683	0.854343	0.132742	0.637211	0.13677	0.626933	-0.698225	0.00379118	0.106015	0.70689	0.33558	0.221407	-0.398842	0.140851	0.11594	0.680727	-0.26114	0.347164	-0.00740482	0.979105
ENSGALG00000002638	ENSGALG00000002638	SRRL	423635	-1:5829189:5856130	blue	0.46175	0.0831494	0.518583	0.0476372	-0.401813	0.137643	0.779943	0.000604678	-0.0684438	0.808495	-0.324957	0.237291	0.527094	0.0434891	-0.164216	0.558668	0.681564	0.00513872	0.351085	0.199456	-0.106174	0.706469	0.0804396	0.775663	0.0886496	0.753391	-0.110716	0.694458	-0.0871818	0.75736	0.919402	1.26e-06	0.0221276	0.93761	-0.110787	0.69427	0.0225227	0.936498	-0.0258149	0.927237	-0.220689	0.429297	-0.0355855	0.899808
ENSGALG00000014999	ENSGALG00000014999	MAP1B	396174	-1:25324362:25392656	blue	0.460923	0.0837748	0.56568	0.0279576	-0.324295	0.238304	0.784259	0.000537643	-0.233468	0.402347	-0.353963	0.195543	0.537737	0.0386862	-0.110637	0.694668	0.510007	0.0521052	0.237726	0.393569	-0.250073	0.368702	0.0463118	0.869817	0.157716	0.574544	-0.0645928	0.819101	-0.167037	0.551835	0.893124	7.38e-06	-0.154285	0.583	-0.270088	0.330277	-0.0723069	0.797887	-0.174475	0.533999	-0.206655	0.459926	0.0991332	0.725213
ENSGALG00000031699	ENSGALG00000031699	NEDD1	417922	1:46042534:46066135	blue	0.460689	0.0839529	0.525912	0.0440486	-0.224024	0.422177	0.657827	0.00768453	-0.0901929	0.749224	-0.223897	0.422447	0.632044	0.0114744	-0.221277	0.428038	0.576762	0.0243941	0.268488	0.333264	-0.102795	0.715446	-0.154783	0.581768	-0.0636906	0.82159	-0.076251	0.78709	-0.0653473	0.817021	0.920249	1.18e-06	-0.0608756	0.829366	-0.295321	0.285244	0.0521715	0.8535	-0.0115455	0.967426	-0.117122	0.677634	-0.0638602	0.821122
ENSGALG00000046457	ENSGALG00000046457	NA	NA	NA:NA:NA	blue	0.459538	0.0848307	0.582823	0.0225971	-0.434121	0.105912	0.7218	0.0023805	-0.0915767	0.745493	-0.218751	0.433464	0.682941	0.00501472	-0.123409	0.661257	0.599891	0.0180764	0.279629	0.3128	-0.247882	0.37305	-0.0224898	0.936591	-0.00179949	0.994922	-0.183714	0.512205	-0.197102	0.48137	0.966527	4.67e-09	-0.143306	0.610391	-0.223338	0.423638	0.136004	0.628884	-0.183184	0.513444	-0.0670454	0.812343	-0.0966471	0.731867
ENSGALG00000005694	ENSGALG00000005694	GARS	428403	-1:4427833:4450500	blue	0.45921	0.085082	0.572334	0.025774	-0.523841	0.0450419	0.613668	0.014963	-0.00044097	0.998756	-0.265189	0.339464	0.767926	0.000827881	-0.128895	0.647084	0.630546	0.0117325	0.225692	0.418638	-0.332763	0.225553	0.0649776	0.81804	-0.113821	0.686287	-0.137637	0.62473	-0.210993	0.450346	0.959294	1.64e-08	-0.121324	0.666674	-0.246759	0.37529	-0.0399849	0.88749	-0.235964	0.397189	0.035195	0.900902	0.00297874	0.991594
ENSGALG00000039791	ENSGALG00000039791	DOLPP1	417196	1:5775799:5788840	blue	0.458806	0.0853918	0.529905	0.0421799	-0.399705	0.139914	0.691451	0.0043001	-0.0835153	0.767299	-0.251765	0.365363	0.657914	0.00767356	-0.225105	0.419881	0.655928	0.00792441	0.303616	0.271281	-0.191073	0.495144	-0.0372771	0.895069	-0.0656092	0.816299	-0.127514	0.65064	-0.111529	0.692316	0.979932	1.73e-10	-0.0760006	0.787774	-0.242051	0.38476	-0.016051	0.954724	-0.0742761	0.792492	-0.122786	0.662875	-0.0567551	0.840775
ENSGALG00000012830	ENSGALG00000012830	IRF4	374179	1:66457756:66470687	blue	0.45856	0.0855812	0.562769	0.028956	-0.40508	0.134173	0.736913	0.0017238	-0.143884	0.608936	-0.272115	0.326518	0.647843	0.00901273	-0.18002	0.520868	0.615873	0.014506	0.275286	0.320687	-0.207229	0.458652	-0.00508873	0.98564	-0.00634962	0.982082	-0.155023	0.581175	-0.146322	0.602817	0.987292	9.05e-12	-0.142258	0.613034	-0.212568	0.446893	-0.0391401	0.889854	-0.120572	0.668631	-0.133094	0.636311	-0.0737447	0.793947
ENSGALG00000041428	ENSGALG00000041428	NEK4	415900	-1:1184932:1201802	blue	0.455337	0.0880897	0.622341	0.0132271	-0.539805	0.0378007	0.619537	0.0137703	-0.0109814	0.969016	-0.254366	0.360263	0.745615	0.00141765	-0.0606394	0.830019	0.589719	0.0206775	0.144637	0.607043	-0.255516	0.35802	-0.130325	0.643406	-0.0715489	0.799966	-0.203987	0.465866	-0.128446	0.648239	0.922214	1.01e-06	-0.15153	0.589825	-0.307225	0.265338	-0.0795562	0.77807	-0.140592	0.617241	0.0745721	0.791682	-0.160008	0.568924
ENSGALG00000043904	ENSGALG00000043904	SH3RF2	416346	1:18478205:18497381	blue	0.454484	0.0887628	0.610233	0.0156973	-0.395667	0.144335	0.698729	0.00375527	-0.160607	0.567458	-0.216711	0.437871	0.701374	0.00357151	-0.093292	0.740875	0.494114	0.061187	0.189834	0.497999	-0.273933	0.323169	-0.011362	0.967943	0.00531511	0.985001	-0.245953	0.376903	-0.155734	0.579422	0.955434	2.92e-08	-0.274076	0.322906	-0.245465	0.377879	-0.0092184	0.973989	-0.213644	0.44454	-0.0230481	0.93502	-0.113532	0.687045
ENSGALG00000042462	ENSGALG00000042462	ST3GAL2L	100858260	1:1184661:1186998	blue	0.454414	0.088818	0.470745	0.0765558	-0.564707	0.0282883	0.588489	0.0210103	0.0705705	0.802651	-0.296479	0.28327	0.552453	0.0327109	-0.0835218	0.767282	0.664743	0.00685826	-0.178623	0.524163	-0.300523	0.276439	0.0552215	0.845029	-0.00177046	0.995004	-0.387615	0.15343	0.0148262	0.958176	0.790683	0.000449176	0.096066	0.733425	-0.366046	0.17965	-0.00920512	0.974027	-0.291756	0.291372	-0.0591658	0.834096	-0.0564709	0.841563
ENSGALG00000032273	ENSGALG00000032273	POLR1B	101749883	1:16112592:16128910	blue	0.453901	0.0892238	0.157777	0.574395	-0.325037	0.23717	0.409455	0.129619	0.107668	0.70251	-0.396182	0.143767	0.217007	0.437231	-0.275077	0.32107	0.62164	0.0133614	-0.0364898	0.897274	-0.180283	0.52025	0.00993224	0.971976	-0.0724966	0.797367	-0.0916733	0.745233	-0.264823	0.340156	0.513522	0.0502385	0.41805	0.120983	0.0113892	0.967866	-0.0658842	0.815541	-0.327758	0.233036	-0.286219	0.301046	-0.0762096	0.787203
ENSGALG00000001666	ENSGALG00000001666	RPAIN	417500	-1:3581614:3584062	blue	0.451079	0.0914833	0.470851	0.0764806	-0.422664	0.116515	0.626148	0.0125163	-0.0205566	0.942033	-0.35216	0.197988	0.630384	0.0117607	-0.262897	0.34381	0.699525	0.00369922	0.294275	0.287035	-0.247017	0.374774	-0.0130344	0.963227	-0.124669	0.657994	-0.180051	0.520796	-0.121392	0.666497	0.949755	6.28e-08	0.0225803	0.936336	-0.199303	0.476387	-0.0292801	0.917499	-0.106163	0.706498	-0.134156	0.633595	-0.0915682	0.745516
ENSGALG00000020084	ENSGALG00000020084	CAPN13	421304	1:8479768:8512438	blue	0.450738	0.0917585	0.58006	0.0234035	-0.140291	0.618	0.728317	0.0020764	-0.237886	0.39324	-0.415487	0.123516	0.435016	0.105114	-0.0608222	0.829514	0.335223	0.22193	0.135902	0.629141	-0.0326945	0.907914	-0.220886	0.428876	0.208757	0.455272	-0.297079	0.28225	0.187708	0.502911	0.767062	0.000846206	-0.187572	0.503227	-0.296943	0.282482	-0.114995	0.683205	0.0498425	0.859979	-0.17028	0.544025	-0.219283	0.432319
ENSGALG00000033828	ENSGALG00000033828	PYCR3	420293	-1:148887321:148890498	blue	0.449968	0.0923835	0.49432	0.0610622	-0.374158	0.169467	0.61301	0.0151017	-0.0103834	0.970703	-0.143102	0.610906	0.68499	0.00483468	-0.239842	0.389245	0.630194	0.0117937	0.328469	0.231964	-0.0828316	0.769156	-0.0113247	0.968048	-0.154768	0.581805	-0.0573942	0.839003	-0.190727	0.495939	0.942236	1.53e-07	-0.0562291	0.842233	-0.0408626	0.885035	0.0605364	0.830304	-0.152187	0.588196	-0.0590678	0.834368	-0.146956	0.60123
ENSGALG00000033063	ENSGALG00000033063	GINS2	415824	1:17631261:17634750	blue	-0.448803	0.0933342	-0.471746	0.0758455	0.357148	0.191268	-0.393234	0.147044	-0.0677863	0.810304	0.123211	0.661771	-0.783024	0.000556166	0.191552	0.494043	-0.503025	0.055964	-0.084997	0.763279	0.343587	0.20989	0.149508	0.594856	0.306615	0.266337	0.285206	0.302835	0.207152	0.458822	-0.849843	6.03e-05	0.12554	0.655738	0.285288	0.30269	-0.103997	0.712249	0.29368	0.288056	-0.151521	0.589848	0.201607	0.471197
ENSGALG00000004002	ENSGALG00000004002	LYPLA2	419685	1:5733966:5739642	blue	0.446727	0.0950457	0.607798	0.0162344	-0.481011	0.0694982	0.54141	0.0371243	0.118861	0.67309	-0.227981	0.413807	0.837625	9.73e-05	-0.0279907	0.921122	0.544756	0.0357427	0.289549	0.295207	-0.230271	0.409003	-0.031516	0.911221	-0.156504	0.577524	-0.187613	0.503133	-0.171787	0.540415	0.896986	5.87e-06	-0.143295	0.610419	-0.215181	0.441193	0.232067	0.405256	-0.170404	0.543729	0.204783	0.464089	-0.129111	0.646528
ENSGALG00000003022	ENSGALG00000003022	DM5L	100857724	-1:4675696:4682832	blue	0.445475	0.0960884	0.490778	0.0632301	-0.491733	0.0626401	0.512648	0.050698	0.112996	0.688453	-0.220051	0.430668	0.63502	0.0109749	-0.0951429	0.735902	0.531258	0.0415601	0.156296	0.578037	-0.188491	0.501099	-0.067813	0.81023	-0.101387	0.719196	-0.379131	0.163418	-0.0591514	0.834136	0.785247	0.000523179	-0.0283155	0.920209	-0.0708393	0.801913	0.18379	0.512026	-0.269384	0.33159	0.0695884	0.805349	-0.350033	0.2009
ENSGALG00000009681	ENSGALG00000009681	BUB3	423949	1:32458807:32470396	blue	0.445134	0.0963731	0.316855	0.249868	-0.263463	0.342734	0.345007	0.207888	0.13249	0.637856	-0.318302	0.247593	0.650649	0.00862256	-0.267807	0.334537	0.578654	0.0238218	0.147085	0.600906	-0.285026	0.303153	0.225577	0.418881	-0.315281	0.252358	-0.0462044	0.870117	-0.190666	0.49608	0.76003	0.00100788	0.0697657	0.804861	-0.19315	0.490379	-0.183884	0.511808	-0.142721	0.611866	0.0284656	0.919787	0.209916	0.452714
ENSGALG00000039084	ENSGALG00000039084	EVI2A	776037	1:9173852:9177498	blue	0.445063	0.0964327	0.599649	0.0181353	-0.418647	0.120398	0.699334	0.00371261	-0.0425003	0.880457	-0.30183	0.274252	0.640227	0.0101417	-0.0508689	0.857123	0.543121	0.0364129	0.311907	0.257745	-0.181468	0.517465	-0.146112	0.603343	0.0370918	0.895588	-0.281089	0.310173	-0.118366	0.674383	0.892261	7.76e-06	-0.116528	0.679188	-0.183418	0.512896	0.251085	0.366703	-0.11256	0.689601	-0.0237606	0.933015	-0.274626	0.321897
ENSGALG00000040087	ENSGALG00000040087	ZNF609	415331	-1:1604895:1646564	blue	-0.444364	0.0970197	-0.276437	0.318586	0.364311	0.181877	-0.314133	0.254183	-0.103605	0.713291	-0.000284828	0.999196	-0.450798	0.0917101	0.200571	0.473528	-0.521657	0.0461069	0.152108	0.588391	0.562225	0.0291455	0.0902212	0.749147	0.156438	0.577687	0.464842	0.0808385	0.220197	0.430353	-0.598304	0.0184647	-0.0815956	0.772517	0.302078	0.273839	0.0741423	0.792858	0.340594	0.214149	0.0268198	0.924412	0.181348	0.517748
ENSGALG00000031276	ENSGALG00000031276	NA	NA	NA:NA:NA	blue	-0.444207	0.0971519	-0.0335018	0.90565	0.107846	0.70204	-0.140562	0.617315	-0.157362	0.575415	-0.0466836	0.86878	-0.290843	0.292955	0.398905	0.140783	-0.534834	0.0399552	0.0824813	0.770109	0.413685	0.125318	0.01744	0.950811	0.295412	0.285088	-0.0405011	0.886046	0.409113	0.129972	-0.424526	0.114743	-0.337977	0.217918	0.178338	0.524835	0.254761	0.359492	0.282054	0.308444	0.162762	0.562201	-0.160588	0.567505
ENSGALG00000030270	ENSGALG00000030270	CD1C	425801	-1:2665728:2668557	blue	0.443612	0.0976547	0.453737	0.0893543	-0.464271	0.0812619	0.630389	0.0117599	-0.125659	0.65543	-0.10332	0.714049	0.561	0.0295756	-0.175462	0.53165	0.559745	0.0300212	0.28492	0.303342	-0.36409	0.182163	0.106246	0.706277	-0.0127996	0.963889	0.0162317	0.954215	-0.539211	0.0380536	0.843613	7.74e-05	-0.106612	0.705306	0.0460028	0.870679	-0.0351957	0.9009	-0.448062	0.0939423	-0.141604	0.614683	-0.0341204	0.903915
ENSGALG00000030849	ENSGALG00000030849		NA	-1:114505:118382	blue	0.443584	0.097678	0.529825	0.0422165	-0.462997	0.082212	0.673713	0.00589275	-0.0660626	0.81505	-0.226215	0.417533	0.64646	0.00921005	-0.174372	0.534244	0.605188	0.0168257	0.137302	0.625581	-0.0802543	0.776168	0.0730082	0.795964	-0.0384811	0.891698	-0.0811029	0.773857	-0.0755692	0.788954	0.923735	8.88e-07	-0.0690674	0.80678	-0.129393	0.645801	-0.0172508	0.951344	-0.279175	0.313618	-0.0909069	0.747298	-0.0448437	0.873913
ENSGALG00000025819	ENSGALG00000025819	UQCRFS1	415752	-1:8114445:8118077	blue	0.443482	0.0977641	0.434069	0.105959	-0.376261	0.166891	0.459468	0.0848843	0.0743366	0.792326	-0.287782	0.298296	0.645187	0.00939455	-0.263973	0.341766	0.662236	0.0071493	0.144511	0.607361	-0.352816	0.197097	-0.257645	0.353888	-0.237823	0.393371	-0.344919	0.208011	-0.0592155	0.833959	0.860252	3.88e-05	0.0647571	0.818648	-0.384378	0.157191	0.000287605	0.999188	-0.0615791	0.827421	-0.0237608	0.933015	-0.238202	0.392593
ENSGALG00000038369	ENSGALG00000038369	NA	NA	NA:NA:NA	blue	0.442075	0.0989599	0.564701	0.0282904	-0.396836	0.143046	0.672575	0.00600891	-0.104725	0.710315	-0.254786	0.359442	0.70224	0.00351293	-0.15907	0.57122	0.57081	0.0262624	0.313362	0.255414	-0.235349	0.398457	0.0541577	0.847982	-0.0648661	0.818347	-0.198241	0.478788	-0.163848	0.55956	0.978202	2.95e-10	-0.201034	0.472486	-0.138879	0.621576	-0.0422376	0.881191	-0.132167	0.638682	-0.0460189	0.870634	-0.111764	0.691696
ENSGALG00000011400	ENSGALG00000011400	USP44	417913	-1:45585772:45597222	blue	0.441289	0.0996328	0.54865	0.0341838	-0.433749	0.106246	0.665028	0.00682581	-0.0529827	0.851246	-0.334803	0.222547	0.664625	0.00687181	-0.168084	0.549309	0.63888	0.0103522	0.349631	0.201453	-0.226095	0.417785	-0.0478772	0.865453	-0.0747544	0.791183	-0.229094	0.41147	-0.143861	0.608995	0.963322	8.39e-09	-0.101259	0.719537	-0.153757	0.584306	-0.0291	0.918005	-0.035262	0.900715	-0.0679631	0.809817	-0.196929	0.481762
ENSGALG00000005188	ENSGALG00000005188	MINDY4	420383	1:1070522:1138100	blue	0.441071	0.0998192	0.519872	0.046991	-0.435931	0.104302	0.715673	0.00269802	-0.0783485	0.781363	-0.296697	0.282899	0.631258	0.0116093	-0.206798	0.459608	0.68494	0.004839	0.281951	0.308628	-0.171535	0.541018	0.000139418	0.999607	-0.0451634	0.873021	-0.17838	0.524735	-0.106721	0.705018	0.981349	1.08e-10	-0.0457785	0.871305	-0.209332	0.454001	0.0507986	0.857318	-0.0856211	0.761587	-0.14544	0.605028	-0.0894351	0.751269
ENSGALG00000009850	ENSGALG00000009850	NOVA1	423300	-1:33031679:33185933	blue	0.440624	0.100203	0.557904	0.030684	-0.348555	0.202939	0.72681	0.0021438	-0.159478	0.570222	-0.134635	0.632372	0.632737	0.0113565	-0.175756	0.530951	0.558764	0.0303727	0.279324	0.313349	-0.121131	0.667176	-0.0594546	0.833297	0.002428	0.993148	-0.10008	0.722684	-0.17865	0.524098	0.954187	3.48e-08	-0.166972	0.551993	-0.134928	0.631625	0.0750969	0.790246	-0.174831	0.533151	-0.126725	0.652678	-0.139896	0.618999
ENSGALG00000014410	ENSGALG00000014410	CSTB	418267	1:77433979:77438548	blue	0.440216	0.100555	0.216324	0.438711	-0.238312	0.392368	0.401254	0.138243	0.119628	0.671089	-0.369365	0.175436	0.29404	0.287438	-0.203095	0.467861	0.622552	0.013187	0.213919	0.44394	-0.260558	0.34828	-0.178049	0.525519	-0.122052	0.664781	-0.301329	0.27509	-0.189205	0.49945	0.571484	0.0260455	0.234456	0.4003	-0.244738	0.379339	-0.164162	0.558798	0.326945	0.234266	-0.150383	0.592678	-0.159598	0.569927
ENSGALG00000009332	ENSGALG00000009332		NA	-1:26616754:26624529	blue	0.43971	0.100993	0.549626	0.0338013	-0.366287	0.179341	0.570433	0.0263843	-0.0265624	0.925136	-0.424955	0.114338	0.743773	0.00147847	-0.148464	0.59746	0.554209	0.0320474	0.370668	0.1738	-0.256585	0.355943	-0.0437404	0.876993	-0.166603	0.552884	-0.199878	0.47509	-0.14837	0.597694	0.939658	2.01e-07	-0.16563	0.555238	-0.223859	0.422528	-0.0651799	0.817482	0.00860287	0.975725	0.0475714	0.866305	-0.115606	0.681602
ENSGALG00000031657	ENSGALG00000031657	IFITM10	771148	1:14337982:14344292	blue	0.439278	0.101367	0.556067	0.0313562	-0.32596	0.235762	0.652193	0.00841351	-0.11315	0.688048	-0.192866	0.491029	0.649654	0.00875931	-0.0787371	0.780303	0.415761	0.123243	0.386918	0.154234	-0.153069	0.586008	0.0686083	0.808043	-0.00621313	0.982467	-0.161779	0.564596	-0.29251	0.290071	0.871471	2.32e-05	-0.264845	0.340115	0.0972542	0.730241	0.110373	0.695363	-0.238882	0.391204	-0.00468863	0.986769	-0.225517	0.419009
ENSGALG00000043352	ENSGALG00000043352	CERS4	420050	-1:194557:243536	blue	0.438437	0.102099	0.467986	0.0785369	-0.176901	0.528235	0.440254	0.100523	0.00456661	0.987113	-0.172129	0.539596	0.659348	0.00749642	-0.105182	0.7091	0.398717	0.140988	0.0651387	0.817596	-0.256199	0.356692	-0.174717	0.533422	-0.16407	0.55902	-0.188975	0.49998	-0.246814	0.375181	0.74055	0.00158998	-0.102848	0.715303	-0.292502	0.290085	0.216894	0.437475	-0.23671	0.395654	0.0860089	0.760536	-0.127373	0.651006
ENSGALG00000007765	ENSGALG00000007765	NA	NA	NA:NA:NA	blue	0.438167	0.102335	0.55528	0.0316473	-0.387807	0.153209	0.659535	0.00747359	-0.0484048	0.863983	-0.287966	0.297973	0.707861	0.003151	-0.195528	0.484947	0.634929	0.0109898	0.292575	0.289959	-0.11353	0.68705	-0.00693894	0.98042	-0.103582	0.713352	-0.120349	0.66921	-0.034932	0.901639	0.981894	8.92e-11	-0.0995891	0.723995	-0.220095	0.430573	-0.0465509	0.86915	-0.0256123	0.927807	-0.0530331	0.851106	-0.0650083	0.817955
ENSGALG00000037258	ENSGALG00000037258	MRPL32	420773	1:51155641:51158032	blue	0.437483	0.102934	0.456756	0.0869794	-0.409365	0.129712	0.647002	0.00913232	-0.0583319	0.836405	-0.282203	0.308176	0.62337	0.0130319	-0.27764	0.316398	0.705454	0.00330211	0.26046	0.348466	-0.259831	0.349675	-0.0360528	0.898499	-0.123779	0.660297	-0.201945	0.470438	-0.167036	0.551837	0.96813	3.4e-09	0.00910956	0.974296	-0.229145	0.411363	0.0895714	0.750901	-0.154589	0.582248	-0.162573	0.562663	-0.102771	0.715508
ENSGALG00000023025	ENSGALG00000023025	NA	NA	NA:NA:NA	blue	0.436489	0.103808	0.439797	0.100918	-0.443367	0.0978615	0.59559	0.0191437	0.0393774	0.889189	-0.121885	0.665216	0.646591	0.00919116	-0.262908	0.343789	0.707362	0.00318186	0.17846	0.524549	-0.14196	0.613785	0.00797121	0.977507	-0.159743	0.569573	-0.128275	0.64868	-0.157372	0.575388	0.920131	1.19e-06	0.0665122	0.813811	-0.132759	0.637168	0.189871	0.497913	-0.271029	0.32853	-0.0993984	0.724504	-0.109642	0.697291
ENSGALG00000037241	ENSGALG00000037241	KCNAB2	396068	-1:673711:691341	blue	-0.434333	0.105722	-0.412042	0.126977	0.39451	0.145619	-0.686039	0.00474448	0.153962	0.583798	0.27593	0.31951	-0.444676	0.0967573	0.276019	0.319349	-0.71719	0.00261643	-0.0971701	0.730466	0.338369	0.217352	0.0634134	0.822355	-0.0188194	0.946925	0.240083	0.388755	0.064832	0.818441	-0.889868	8.9e-06	-0.0402301	0.886804	0.422832	0.116353	0.234741	0.399712	0.00342114	0.990346	0.303536	0.271414	-0.0169233	0.952266
ENSGALG00000000902	ENSGALG00000000902	KDF1	769268	-1:1939316:1944798	blue	0.433235	0.106707	0.39377	0.146444	-0.220471	0.429766	0.555921	0.0314101	-0.139572	0.619821	-0.175681	0.531128	0.513536	0.0502311	-0.21003	0.452464	0.483315	0.0679809	0.0279156	0.921333	-0.256492	0.356122	-0.0333493	0.906077	-0.0735704	0.794424	-0.31157	0.258288	-0.0861642	0.760115	0.801005	0.000332102	-0.13147	0.640468	-0.345413	0.207318	-0.101054	0.720085	-0.0642298	0.820102	-0.121765	0.665525	-0.0443333	0.875338
ENSGALG00000009388	ENSGALG00000009388	SUSD4	770442	1:17861903:17932443	blue	0.433109	0.106821	0.344309	0.208871	-0.375472	0.167855	0.36847	0.176566	0.0393579	0.889244	-0.487721	0.065146	0.470878	0.0764613	-0.186487	0.505745	0.48694	0.0656422	-0.00098712	0.997214	-0.285712	0.301941	-0.141689	0.614467	-0.16213	0.563741	-0.23049	0.408546	-0.126634	0.652912	0.63751	0.01057	0.0856618	0.761476	-0.20056	0.473553	-0.263668	0.342346	-0.214847	0.441919	-0.0388521	0.890659	-0.172976	0.537573
ENSGALG00000026914	ENSGALG00000026914	DOK3	429960	-1:10890327:10892838	blue	0.433033	0.106889	0.692591	0.00421088	-0.417145	0.121873	0.788565	0.000476925	-0.118602	0.673765	-0.351669	0.198658	0.652797	0.00833296	0.0996226	0.723905	0.421848	0.117296	0.345484	0.207218	-0.0315046	0.911253	0.16158	0.565082	0.195072	0.485986	-0.0514086	0.855622	-0.0775482	0.783547	0.868608	2.66e-05	-0.27993	0.312256	-0.0714674	0.80019	-0.00776435	0.978091	-0.0662363	0.814571	0.0210227	0.94072	0.0060255	0.982997
ENSGALG00000029438	ENSGALG00000029438	NA	NA	NA:NA:NA	blue	0.432853	0.107051	0.518295	0.0477827	-0.406861	0.132306	0.67445	0.00581844	-0.0816696	0.772316	-0.280309	0.311573	0.673785	0.00588549	-0.229034	0.411595	0.661098	0.00728457	0.303122	0.272102	-0.180078	0.520732	0.0260896	0.926465	-0.102009	0.717538	-0.15726	0.575663	-0.112036	0.690979	0.995501	1.08e-14	-0.0936577	0.739892	-0.188333	0.501466	-0.0257852	0.927321	-0.0764367	0.786583	-0.108711	0.699751	-0.0759835	0.787821
ENSGALG00000031874	ENSGALG00000031874	HIST1H101	417954	1:48151569:48152313	blue	0.431732	0.108066	0.469133	0.0777086	-0.330803	0.228465	0.598657	0.0183778	-0.0830952	0.76844	-0.217118	0.436991	0.651489	0.00850838	-0.246699	0.375411	0.618908	0.0138946	0.392326	0.148063	-0.338173	0.217636	-0.0214352	0.939559	-0.142376	0.612736	-0.172672	0.538298	-0.26673	0.336559	0.945817	1.02e-07	-0.123284	0.661581	-0.190188	0.497181	-0.0496542	0.860504	-0.0310567	0.91251	-0.0928405	0.74209	-0.0861423	0.760174
ENSGALG00000008963	ENSGALG00000008963	DBF4	420536	1:20828415:20844335	blue	0.428796	0.110753	0.538161	0.0385033	-0.399967	0.139631	0.671014	0.00617117	-0.0861775	0.760079	-0.345408	0.207325	0.665981	0.00671811	-0.190974	0.495372	0.643867	0.00958913	0.248078	0.372661	-0.214016	0.443729	-0.0687761	0.807581	-0.0755244	0.789077	-0.210775	0.450825	-0.0349532	0.90158	0.973694	9.92e-10	-0.0929714	0.741738	-0.353991	0.195505	-0.0196161	0.944681	-0.00036243	0.998977	-0.0901486	0.749343	-0.0583625	0.836321
ENSGALG00000044814	ENSGALG00000044814	CCDC14	424252	-1:27378340:27386680	blue	0.427099	0.112327	0.480904	0.0695688	-0.439892	0.100835	0.609663	0.0158218	-0.0785597	0.780787	-0.215344	0.440837	0.676214	0.00564363	-0.197095	0.481385	0.641735	0.00990978	0.261356	0.346751	-0.477364	0.0719493	0.0653987	0.816879	-0.113107	0.688164	-0.227255	0.415336	-0.315651	0.251772	0.951215	5.2e-08	-0.124948	0.657271	-0.287413	0.298944	0.0151793	0.957181	-0.197457	0.480564	-0.0723069	0.797887	0.0106306	0.970006
ENSGALG00000039206	ENSGALG00000039206	ARID5A	101749459	-1:3788778:3793564	blue	0.426326	0.113049	0.745631	0.0014171	-0.516037	0.048933	0.709836	0.00303109	-0.0265613	0.925139	-0.39829	0.141453	0.605351	0.0167882	0.284115	0.304769	0.324087	0.238622	0.244855	0.379104	-0.168807	0.547568	-0.221177	0.428251	0.284199	0.304621	-0.3464	0.205936	0.0903003	0.748934	0.708418	0.00311682	-0.286098	0.301259	-0.39917	0.140495	0.118785	0.673288	0.101044	0.720112	0.176243	0.529796	-0.211808	0.448557
ENSGALG00000037332	ENSGALG00000037332	IGFBP7	422620	1:49164561:49178507	blue	0.42618	0.113186	0.497175	0.0593541	-0.356005	0.192795	0.653821	0.00819758	-0.104353	0.711302	-0.253352	0.362247	0.6558	0.00794079	-0.250365	0.368124	0.628198	0.0121461	0.347212	0.204804	-0.137471	0.62515	-0.0166828	0.952944	-0.124497	0.658437	-0.122684	0.663138	-0.142175	0.613241	0.979132	2.23e-10	-0.118549	0.673904	-0.142134	0.613344	-0.0544549	0.847157	-0.0296332	0.916508	-0.113255	0.687774	-0.114392	0.684787
ENSGALG00000017493	ENSGALG00000017493	TRPC2L	100857925	1:195602594:195605798	blue	0.425969	0.113383	0.524714	0.0446209	-0.471233	0.0762091	0.593887	0.0195794	0.0574919	0.838732	-0.197315	0.480887	0.630637	0.0117168	-0.108114	0.701329	0.579163	0.0236698	-0.0183137	0.948349	0.0219431	0.93813	0.0156869	0.95575	-0.0360595	0.89848	-0.107984	0.701676	0.098048	0.728115	0.815374	0.000211733	0.0292962	0.917454	-0.196525	0.48268	0.0711384	0.801092	-0.28213	0.308308	-0.007424	0.979051	-0.0665765	0.813634
ENSGALG00000039577	ENSGALG00000039577	NA	NA	NA:NA:NA	blue	0.425374	0.113943	0.348228	0.203392	-0.263738	0.342213	0.494648	0.0608645	-0.113356	0.687508	-0.45787	0.0861143	0.387514	0.153545	-0.195746	0.48445	0.433401	0.106558	0.0882305	0.754524	-0.316736	0.250055	-0.0903978	0.748671	-0.0248576	0.929929	-0.260347	0.348684	-0.181187	0.518124	0.667984	0.00649601	0.00761632	0.978508	-0.158711	0.572102	-0.1324	0.638085	-0.246857	0.375095	-0.17785	0.525989	-0.156728	0.576973
ENSGALG00000034903	ENSGALG00000034903	LOC101748312	101748312	-1:555450:559965	blue	-0.425094	0.114207	-0.426375	0.113003	0.387614	0.153431	-0.487322	0.0653992	0.00696899	0.980335	0.315843	0.251467	-0.586585	0.0215339	0.0998315	0.723347	-0.483176	0.0680718	-0.323296	0.239836	0.217205	0.436802	-0.0871146	0.757542	0.154632	0.582142	0.242831	0.383182	0.334763	0.222605	-0.776992	0.000654304	0.177987	0.525666	-0.0879107	0.755388	0.240982	0.386926	-0.00724016	0.97957	-0.0474031	0.866774	0.241009	0.386872
ENSGALG00000016809	ENSGALG00000016809	EDAR	428015	-1:137823933:137849975	blue	-0.424598	0.114675	-0.515301	0.0493122	0.54174	0.0369859	-0.631042	0.0116466	-0.0438638	0.876649	0.385871	0.155449	-0.681929	0.00510561	0.128397	0.648366	-0.713647	0.00281011	-0.281659	0.309151	0.255227	0.358582	-0.0618165	0.826765	0.101073	0.720033	0.190658	0.496098	0.141666	0.614527	-0.935014	3.22e-07	0.00737263	0.979196	0.256337	0.356424	-0.0313784	0.911608	0.0371836	0.895331	0.0221225	0.937625	0.0203241	0.942687
ENSGALG00000007331	ENSGALG00000007331	SVIL	420475	-1:14681633:14783967	blue	0.424342	0.114918	0.499819	0.0578039	-0.444318	0.097059	0.640283	0.0101329	-0.0468802	0.868232	-0.166002	0.554337	0.675754	0.00568881	-0.22335	0.423611	0.645302	0.00937786	0.306732	0.266146	-0.136202	0.628378	0.00430579	0.987849	-0.124864	0.657488	-0.0837892	0.766556	-0.211712	0.448767	0.957907	2.03e-08	-0.075334	0.789597	-0.0732807	0.795218	0.0830616	0.768532	-0.202875	0.468354	-0.0787738	0.780203	-0.134844	0.631838
[truncated: 15,769 more rows]
[truncated: 44 more columns]

## Sheet: Module GO enrichment analysis
module	modSize	bkgrModSize	rank	enrichmentP	BonferoniP	nModGenesInTerm	fracOfBkgrModSize	fracOfBkgrTermSize	bkgrTermSize	termID	termOntology	termName	termDefinition
[truncated: 430 more rows]

[truncated: 3 more sheets: Module KEGG analysis, Sankeycharts, genes in PPI analysis]
