# Supplementary figures and images for: Effects of Selenium Yeast on Egg Quality, Plasma Antioxidants, Selenium Deposition and Eggshell Formation in Aged Laying Hens
Source: MDPI journal article supplement (doi:10.3390/ani13050902), 2023-03-01

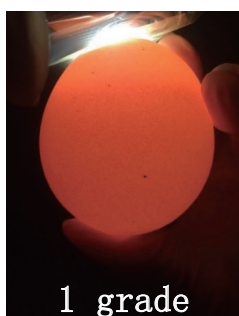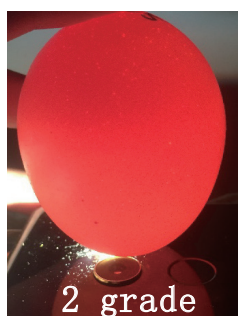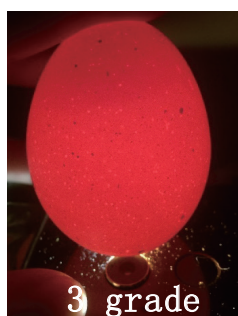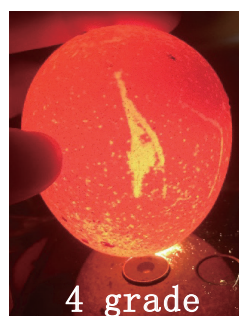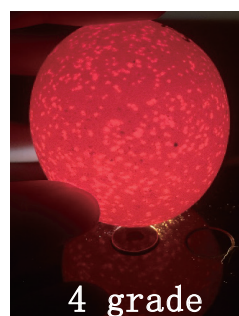

Supplement: s1 [file s1]
